# Supplementary material for: Dynamic Development of Viral and Bacterial Diversity during Grass Silage Preservation
Source: Viruses. 2023 Apr 12;15(4):951. doi: 10.3390/v15040951 (PMC10146946; doi:10.3390/v15040951)
Supplement: Supplementary file 1 [file viruses-15-00951-s001.zip › Supplementary_material S2.xlsx]

## Sheet: Table S1
MAG	completeness	contamination	Contigs	N50	N75	L50	L75	GC (%)	contigs (>= 0 bp)	contigs (>= 1000 bp)	contigs (>= 5000 bp)	contigs (>= 10000 bp)	contigs (>= 25000 bp)	contigs (>= 50000 bp)
C2A_bin.5	97.4502	0	36	89390	40381	7	14	36.58	36	36	34	29	21	10
C2B_bin.4	79.6172	0	98	47053	32265	13	30	44.23	98	98	68	52	32	12
C2C_bin.7	78.2297	9.64912	591	4921	3258	150	309	36.92	591	591	146	43	1	0
C4B_bin.1	75.8028	5.2971	418	3913	2674	126	240	38.88	418	418	73	2	0	0
C4C_bin.3	84.8663	1.92708	288	6671	4419	80	154	46.58	288	288	133	31	1	0
C4C_bin.8	84.4946	8.30516	980	4233	2141	194	457	37.68	980	980	142	40	3	0
C8A_bin.2	96.5278	0.517677	186	18813	8626	32	68	35.41	186	186	104	59	18	0
C8A_bin.3	95.7055	0.306748	339	9886	4085	51	126	45.36	339	339	106	50	9	1
C8A_bin.6	99.8236	0	19	221511	100284	3	7	38.79	19	19	19	19	14	12
C15B_bin.6	76.506	1.30208	380	5293	3811	114	218	46.12	380	380	129	22	0	0
C40A_bin.1	99.0625	0	16	354046	133340	3	6	44.44	16	16	16	16	12	10
C40A_bin.2	94.2087	1.20309	453	7202	3914	105	217	30.59	453	453	168	49	2	0
C40C_bin.5	98.9375	0.625	27	165452	85602	6	12	40.02	27	27	27	26	24	19
C40C_bin.6	99.2477	3.13786	155	38012	16780	20	52	44.53	155	155	115	83	32	13
C40C_bin.8	70.4052	2.96524	269	5361	3578	77	152	37.82	269	269	92	17	0	0
T0B_bin.2	85.2968	1.17849	1104	3826	2272	256	547	55.83	1104	1104	160	31	1	0
T0B_bin.3	97.9455	1.67121	160	46234	23854	30	61	54.14	160	160	133	113	59	25
T0B_bin.4	81.01219454 2.037097376		304	10272	6502	79	156	47.95	304	304	206	86	4	0
T0C_bin.2	85.1491	1.88221	1659	2382	1660	489	953	39.75	1659	1659	80	1	0	0
Average	88.8487	2.22045	393.789	54972.2	25234	96.5789	198.895	42.1905	393.789	393.789	102.684	40.4737	12.2632	5.36842
sd	9.84573	2.82183	429.333	93970.5	38596.1	118.142	237.082	6.38524	429.333	429.333	53.7577	29.1536	15.751	7.80463
Median	89.7527	1.25259	288	9886	4419	77	152	40.02	288	288	106	31	4	0

## Sheet: Table S2
user_genome	classification	fastani_reference	fastani_reference_radius	fastani_taxonomy	fastani_ani	fastani_af	closest_placement_reference	closest_placement_radius	closest_placement_taxonomy	closest_placement_ani	closest_placement_af	pplacer_taxonomy	classification_method	note	other_related_references(genome_id,species_name,radius,ANI,AF)	msa_percent	translation_table	red_value	warnings
C15B_bin.9	d__Bacteria;p__Firmicutes_A;c__Clostridia;o__Clostridiales;f__Clostridiaceae;g__Clostridium_B;s__Clostridium tyrobutyricum	GCF_000359585.1	95	d__Bacteria;p__Firmicutes_A;c__Clostridia;o__Clostridiales;f__Clostridiaceae;g__Clostridium_B;s__Clostridium tyrobutyricum	99.47	0.93	GCF_000359585.1	95	d__Bacteria;p__Firmicutes_A;c__Clostridia;o__Clostridiales;f__Clostridiaceae;g__Clostridium_B;s__Clostridium_B tyrobutyricum	99.47	0.93	d__Bacteria;p__Firmicutes_A;c__Clostridia;o__Clostridiales;f__Clostridiaceae;g__Clostridium_B;s__	taxonomic classification defined by topology and ANI	topological placement and ANI have congruent species assignments	GCF_017874415.1, s__Clostridium_B algifaecis, 95.0, 79.49, 0.51; GCF_014050525.1, s__Clostridium_B sp014050525, 95.0, 78.94, 0.4; GCF_004006395.2, s__Clostridium_B sp004006395, 95.0, 78.1, 0.3; GCF_001675165.1, s__Clostridium_B ragsdalei, 95.0, 78.02, 0.3; GCF_001636845.1, s__Clostridium_B ljungdahlii_A, 95.0, 77.87, 0.27; GCF_000143685.1, s__Clostridium_B ljungdahlii, 95.0, 77.84, 0.3; GCF_00299…	78.65	11	N/A	N/A
C40A_bin.2	d__Bacteria;p__Firmicutes_A;c__Clostridia;o__Clostridiales;f__Clostridiaceae;g__Clostridium_B;s__Clostridium tyrobutyricum	GCF_000359585.1	95	d__Bacteria;p__Firmicutes_A;c__Clostridia;o__Clostridiales;f__Clostridiaceae;g__Clostridium_B;s__Clostridium tyrobutyricum	99.52	0.97	GCF_000359585.1	95	d__Bacteria;p__Firmicutes_A;c__Clostridia;o__Clostridiales;f__Clostridiaceae;g__Clostridium_B;s__Clostridium_B tyrobutyricum	99.52	0.97	d__Bacteria;p__Firmicutes_A;c__Clostridia;o__Clostridiales;f__Clostridiaceae;g__Clostridium_B;s__	taxonomic classification defined by topology and ANI	topological placement and ANI have congruent species assignments	GCF_017874415.1, s__Clostridium_B algifaecis, 95.0, 79.53, 0.52; GCF_014050525.1, s__Clostridium_B sp014050525, 95.0, 78.94, 0.44; GCF_001636845.1, s__Clostridium_B ljungdahlii_A, 95.0, 78.11, 0.28; GCF_004006395.2, s__Clostridium_B sp004006395, 95.0, 77.97, 0.32; GCF_000143685.1, s__Clostridium_B ljungdahlii, 95.0, 77.89, 0.31; GCF_001675165.1, s__Clostridium_B ragsdalei, 95.0, 77.8, 0.31; GCF_0…	86.5	11	N/A	N/A
C40C_bin.9	d__Bacteria;p__Firmicutes_A;c__Clostridia;o__Clostridiales;f__Clostridiaceae;g__Clostridium_B;s__Clostridium tyrobutyricum	GCF_000359585.1	95	d__Bacteria;p__Firmicutes_A;c__Clostridia;o__Clostridiales;f__Clostridiaceae;g__Clostridium_B;s__Clostridium tyrobutyricum	99.45	0.97	GCF_000359585.1	95	d__Bacteria;p__Firmicutes_A;c__Clostridia;o__Clostridiales;f__Clostridiaceae;g__Clostridium_B;s__Clostridium_B tyrobutyricum	99.45	0.97	d__Bacteria;p__Firmicutes_A;c__Clostridia;o__Clostridiales;f__Clostridiaceae;g__Clostridium_B;s__	taxonomic classification defined by topology and ANI	topological placement and ANI have congruent species assignments	GCF_017874415.1, s__Clostridium_B algifaecis, 95.0, 79.43, 0.54; GCF_014050525.1, s__Clostridium_B sp014050525, 95.0, 79.31, 0.41; GCF_004006395.2, s__Clostridium_B sp004006395, 95.0, 77.86, 0.32; GCF_001636845.1, s__Clostridium_B ljungdahlii_A, 95.0, 77.81, 0.3; GCF_000143685.1, s__Clostridium_B ljungdahlii, 95.0, 77.8, 0.31; GCF_001675165.1, s__Clostridium_B ragsdalei, 95.0, 77.7, 0.32; GCA_902…	82.45	11	N/A	N/A
C15A_bin.6	d__Bacteria;p__Firmicutes;c__Bacilli;o__Lactobacillales;f__Lactobacillaceae;g__Lactiplantibacillus;s__Lactiplantibacillus plantarum	GCF_014131735.1	95	d__Bacteria;p__Firmicutes;c__Bacilli;o__Lactobacillales;f__Lactobacillaceae;g__Lactiplantibacillus;s__Lactiplantibacillus plantarum	99.13	0.95	GCF_014131735.1	95	d__Bacteria;p__Firmicutes;c__Bacilli;o__Lactobacillales;f__Lactobacillaceae;g__Lactiplantibacillus;s__Lactiplantibacillus plantarum	99.13	0.95	d__Bacteria;p__Firmicutes;c__Bacilli;o__Lactobacillales;f__Lactobacillaceae;g__Lactiplantibacillus;s__	taxonomic classification defined by topology and ANI	topological placement and ANI have congruent species assignments	GCF_003641145.1, s__Lactiplantibacillus paraplantarum, 95.0, 87.87, 0.79; GCF_003641185.1, s__Lactiplantibacillus pentosus, 95.0, 82.88, 0.67; GCF_000463075.2, s__Lactiplantibacillus plantarum_A, 95.0, 82.67, 0.65; GCF_001039045.1, s__Lactiplantibacillus herbarum, 95.0, 80.41, 0.45; GCF_001438845.1, s__Lactiplantibacillus xiangfangensis, 95.0, 80.36, 0.38; GCF_003885105.1, s__Lactiplantibacillus …	79.11	11	N/A	N/A
C15B_bin.1	d__Bacteria;p__Firmicutes;c__Bacilli;o__Lactobacillales;f__Lactobacillaceae;g__Lactiplantibacillus;s__Lactiplantibacillus plantarum	GCF_014131735.1	95	d__Bacteria;p__Firmicutes;c__Bacilli;o__Lactobacillales;f__Lactobacillaceae;g__Lactiplantibacillus;s__Lactiplantibacillus plantarum	99.23	0.89	GCF_014131735.1	95	d__Bacteria;p__Firmicutes;c__Bacilli;o__Lactobacillales;f__Lactobacillaceae;g__Lactiplantibacillus;s__Lactiplantibacillus plantarum	99.23	0.89	d__Bacteria;p__Firmicutes;c__Bacilli;o__Lactobacillales;f__Lactobacillaceae;g__Lactiplantibacillus;s__	taxonomic classification defined by topology and ANI	topological placement and ANI have congruent species assignments	GCF_003641145.1, s__Lactiplantibacillus paraplantarum, 95.0, 87.12, 0.75; GCF_000463075.2, s__Lactiplantibacillus plantarum_A, 95.0, 82.88, 0.63; GCF_003641185.1, s__Lactiplantibacillus pentosus, 95.0, 82.83, 0.66; GCF_001039045.1, s__Lactiplantibacillus herbarum, 95.0, 80.6, 0.46; GCF_001438845.1, s__Lactiplantibacillus xiangfangensis, 95.0, 80.57, 0.37; GCF_005405405.1, s__Lactiplantibacillus p…	68.9	11	N/A	N/A
C15C_bin.7	d__Bacteria;p__Firmicutes;c__Bacilli;o__Lactobacillales;f__Lactobacillaceae;g__Lactiplantibacillus;s__Lactiplantibacillus plantarum	GCF_014131735.1	95	d__Bacteria;p__Firmicutes;c__Bacilli;o__Lactobacillales;f__Lactobacillaceae;g__Lactiplantibacillus;s__Lactiplantibacillus plantarum	99.41	0.98	GCF_014131735.1	95	d__Bacteria;p__Firmicutes;c__Bacilli;o__Lactobacillales;f__Lactobacillaceae;g__Lactiplantibacillus;s__Lactiplantibacillus plantarum	99.41	0.98	d__Bacteria;p__Firmicutes;c__Bacilli;o__Lactobacillales;f__Lactobacillaceae;g__Lactiplantibacillus;s__	taxonomic classification defined by topology and ANI	topological placement and ANI have congruent species assignments	GCF_003641145.1, s__Lactiplantibacillus paraplantarum, 95.0, 87.48, 0.82; GCF_000463075.2, s__Lactiplantibacillus plantarum_A, 95.0, 82.55, 0.69; GCF_003641185.1, s__Lactiplantibacillus pentosus, 95.0, 82.55, 0.69; GCF_001039045.1, s__Lactiplantibacillus herbarum, 95.0, 80.38, 0.49; GCF_001438845.1, s__Lactiplantibacillus xiangfangensis, 95.0, 80.28, 0.38; GCF_003885105.1, s__Lactiplantibacillus …	69.64	11	N/A	N/A
C40A_bin.7	d__Bacteria;p__Firmicutes;c__Bacilli;o__Lactobacillales;f__Lactobacillaceae;g__Lactiplantibacillus;s__Lactiplantibacillus plantarum	GCF_014131735.1	95	d__Bacteria;p__Firmicutes;c__Bacilli;o__Lactobacillales;f__Lactobacillaceae;g__Lactiplantibacillus;s__Lactiplantibacillus plantarum	99.33	0.98	GCF_014131735.1	95	d__Bacteria;p__Firmicutes;c__Bacilli;o__Lactobacillales;f__Lactobacillaceae;g__Lactiplantibacillus;s__Lactiplantibacillus plantarum	99.33	0.98	d__Bacteria;p__Firmicutes;c__Bacilli;o__Lactobacillales;f__Lactobacillaceae;g__Lactiplantibacillus;s__	taxonomic classification defined by topology and ANI	topological placement and ANI have congruent species assignments	GCF_003641145.1, s__Lactiplantibacillus paraplantarum, 95.0, 87.5, 0.82; GCF_003641185.1, s__Lactiplantibacillus pentosus, 95.0, 82.66, 0.7; GCF_000463075.2, s__Lactiplantibacillus plantarum_A, 95.0, 82.62, 0.68; GCF_001039045.1, s__Lactiplantibacillus herbarum, 95.0, 80.36, 0.5; GCF_001438845.1, s__Lactiplantibacillus xiangfangensis, 95.0, 80.19, 0.41; GCF_003885105.1, s__Lactiplantibacillus gar…	59.45	11	N/A	N/A
C40B_bin.7	d__Bacteria;p__Firmicutes;c__Bacilli;o__Lactobacillales;f__Lactobacillaceae;g__Lactiplantibacillus;s__Lactiplantibacillus plantarum	GCF_014131735.1	95	d__Bacteria;p__Firmicutes;c__Bacilli;o__Lactobacillales;f__Lactobacillaceae;g__Lactiplantibacillus;s__Lactiplantibacillus plantarum	99.25	0.96	GCF_014131735.1	95	d__Bacteria;p__Firmicutes;c__Bacilli;o__Lactobacillales;f__Lactobacillaceae;g__Lactiplantibacillus;s__Lactiplantibacillus plantarum	99.25	0.96	d__Bacteria;p__Firmicutes;c__Bacilli;o__Lactobacillales;f__Lactobacillaceae;g__Lactiplantibacillus;s__	taxonomic classification defined by topology and ANI	topological placement and ANI have congruent species assignments	GCF_003641145.1, s__Lactiplantibacillus paraplantarum, 95.0, 87.37, 0.84; GCF_000463075.2, s__Lactiplantibacillus plantarum_A, 95.0, 82.99, 0.67; GCF_003641185.1, s__Lactiplantibacillus pentosus, 95.0, 82.9, 0.72; GCF_003885105.1, s__Lactiplantibacillus garii, 95.0, 80.75, 0.41; GCF_001438845.1, s__Lactiplantibacillus xiangfangensis, 95.0, 80.65, 0.43; GCF_001039045.1, s__Lactiplantibacillus herb…	68.88	11	N/A	N/A
C40C_bin.6	d__Bacteria;p__Firmicutes;c__Bacilli;o__Lactobacillales;f__Lactobacillaceae;g__Lactiplantibacillus;s__Lactiplantibacillus plantarum	GCF_014131735.1	95	d__Bacteria;p__Firmicutes;c__Bacilli;o__Lactobacillales;f__Lactobacillaceae;g__Lactiplantibacillus;s__Lactiplantibacillus plantarum	98.97	0.92	GCF_014131735.1	95	d__Bacteria;p__Firmicutes;c__Bacilli;o__Lactobacillales;f__Lactobacillaceae;g__Lactiplantibacillus;s__Lactiplantibacillus plantarum	98.97	0.92	d__Bacteria;p__Firmicutes;c__Bacilli;o__Lactobacillales;f__Lactobacillaceae;g__Lactiplantibacillus;s__	taxonomic classification defined by topology and ANI	topological placement and ANI have congruent species assignments	GCF_003641145.1, s__Lactiplantibacillus paraplantarum, 95.0, 87.71, 0.76; GCF_003641185.1, s__Lactiplantibacillus pentosus, 95.0, 82.77, 0.66; GCF_000463075.2, s__Lactiplantibacillus plantarum_A, 95.0, 82.49, 0.61; GCF_001039045.1, s__Lactiplantibacillus herbarum, 95.0, 80.52, 0.46; GCF_001438845.1, s__Lactiplantibacillus xiangfangensis, 95.0, 80.39, 0.36; GCF_003885105.1, s__Lactiplantibacillus …	89.75	11	N/A	N/A
C4C_bin.1	d__Bacteria;p__Firmicutes;c__Bacilli;o__Lactobacillales;f__Lactobacillaceae;g__Lactiplantibacillus;s__Lactiplantibacillus plantarum	GCF_014131735.1	95	d__Bacteria;p__Firmicutes;c__Bacilli;o__Lactobacillales;f__Lactobacillaceae;g__Lactiplantibacillus;s__Lactiplantibacillus plantarum	99.12	0.94	GCF_014131735.1	95	d__Bacteria;p__Firmicutes;c__Bacilli;o__Lactobacillales;f__Lactobacillaceae;g__Lactiplantibacillus;s__Lactiplantibacillus plantarum	99.12	0.94	d__Bacteria;p__Firmicutes;c__Bacilli;o__Lactobacillales;f__Lactobacillaceae;g__Lactiplantibacillus;s__	taxonomic classification defined by topology and ANI	topological placement and ANI have congruent species assignments	GCF_003641145.1, s__Lactiplantibacillus paraplantarum, 95.0, 87.58, 0.79; GCF_003641185.1, s__Lactiplantibacillus pentosus, 95.0, 83.02, 0.69; GCF_000463075.2, s__Lactiplantibacillus plantarum_A, 95.0, 82.86, 0.63; GCF_001039045.1, s__Lactiplantibacillus herbarum, 95.0, 80.72, 0.46; GCF_001438845.1, s__Lactiplantibacillus xiangfangensis, 95.0, 80.5, 0.36; GCF_003885105.1, s__Lactiplantibacillus g…	83.82	11	N/A	N/A
C8B_bin.8	d__Bacteria;p__Firmicutes;c__Bacilli;o__Lactobacillales;f__Lactobacillaceae;g__Lactiplantibacillus;s__Lactiplantibacillus plantarum	GCF_014131735.1	95	d__Bacteria;p__Firmicutes;c__Bacilli;o__Lactobacillales;f__Lactobacillaceae;g__Lactiplantibacillus;s__Lactiplantibacillus plantarum	99.26	0.96	GCF_014131735.1	95	d__Bacteria;p__Firmicutes;c__Bacilli;o__Lactobacillales;f__Lactobacillaceae;g__Lactiplantibacillus;s__Lactiplantibacillus plantarum	99.26	0.96	d__Bacteria;p__Firmicutes;c__Bacilli;o__Lactobacillales;f__Lactobacillaceae;g__Lactiplantibacillus;s__	taxonomic classification defined by topology and ANI	topological placement and ANI have congruent species assignments	GCF_003641145.1, s__Lactiplantibacillus paraplantarum, 95.0, 87.45, 0.82; GCF_000463075.2, s__Lactiplantibacillus plantarum_A, 95.0, 82.53, 0.65; GCF_003641185.1, s__Lactiplantibacillus pentosus, 95.0, 82.53, 0.68; GCF_001039045.1, s__Lactiplantibacillus herbarum, 95.0, 80.19, 0.45; GCF_001438845.1, s__Lactiplantibacillus xiangfangensis, 95.0, 80.18, 0.39; GCF_003885105.1, s__Lactiplantibacillus …	69.16	11	N/A	N/A
C8C_bin.5	d__Bacteria;p__Firmicutes;c__Bacilli;o__Lactobacillales;f__Lactobacillaceae;g__Lactiplantibacillus;s__Lactiplantibacillus plantarum	GCF_014131735.1	95	d__Bacteria;p__Firmicutes;c__Bacilli;o__Lactobacillales;f__Lactobacillaceae;g__Lactiplantibacillus;s__Lactiplantibacillus plantarum	98.94	0.9	GCF_014131735.1	95	d__Bacteria;p__Firmicutes;c__Bacilli;o__Lactobacillales;f__Lactobacillaceae;g__Lactiplantibacillus;s__Lactiplantibacillus plantarum	98.94	0.9	d__Bacteria;p__Firmicutes;c__Bacilli;o__Lactobacillales;f__Lactobacillaceae;g__Lactiplantibacillus;s__	taxonomic classification defined by topology and ANI	topological placement and ANI have congruent species assignments	GCF_003641145.1, s__Lactiplantibacillus paraplantarum, 95.0, 87.62, 0.77; GCF_003641185.1, s__Lactiplantibacillus pentosus, 95.0, 83.01, 0.64; GCF_000463075.2, s__Lactiplantibacillus plantarum_A, 95.0, 82.64, 0.58; GCF_001039045.1, s__Lactiplantibacillus herbarum, 95.0, 80.52, 0.45; GCF_001438845.1, s__Lactiplantibacillus xiangfangensis, 95.0, 80.36, 0.34; GCF_000498955.2, s__Lactiplantibacillus …	84.51	11	N/A	N/A
C15A_bin.3	d__Bacteria;p__Firmicutes;c__Bacilli;o__Lactobacillales;f__Lactobacillaceae;g__Lentilactobacillus;s__Lentilactobacillus buchneri	GCF_018314255.1	95	d__Bacteria;p__Firmicutes;c__Bacilli;o__Lactobacillales;f__Lactobacillaceae;g__Lentilactobacillus;s__Lentilactobacillus buchneri	95.93	0.62	GCF_018314255.1	95	d__Bacteria;p__Firmicutes;c__Bacilli;o__Lactobacillales;f__Lactobacillaceae;g__Lentilactobacillus;s__Lentilactobacillus buchneri	95.93	0.62	d__Bacteria;p__Firmicutes;c__Bacilli;o__Lactobacillales;f__Lactobacillaceae;g__Lentilactobacillus;s__	taxonomic classification defined by topology and ANI	topological placement and ANI have congruent species assignments	GCF_001434255.1, s__Lentilactobacillus diolivorans, 95.0, 92.45, 0.61; GCF_002157585.1, s__Lentilactobacillus parakefiri, 95.0, 85.77, 0.57; GCF_001434145.1, s__Lentilactobacillus otakiensis, 95.0, 83.26, 0.5; GCF_007989105.1, s__Lentilactobacillus kefiri, 95.0, 82.03, 0.47; GCF_001435575.1, s__Lentilactobacillus sunkii, 95.0, 81.97, 0.48; GCF_001435315.1, s__Lentilactobacillus parabuchneri, 95.0…	92.55	11	N/A	N/A
C15B_bin.4	d__Bacteria;p__Firmicutes;c__Bacilli;o__Lactobacillales;f__Lactobacillaceae;g__Lentilactobacillus;s__Lentilactobacillus buchneri	GCF_018314255.1	95	d__Bacteria;p__Firmicutes;c__Bacilli;o__Lactobacillales;f__Lactobacillaceae;g__Lentilactobacillus;s__Lentilactobacillus buchneri	97.19	0.9	GCF_018314255.1	95	d__Bacteria;p__Firmicutes;c__Bacilli;o__Lactobacillales;f__Lactobacillaceae;g__Lentilactobacillus;s__Lentilactobacillus buchneri	97.19	0.9	d__Bacteria;p__Firmicutes;c__Bacilli;o__Lactobacillales;f__Lactobacillaceae;g__Lentilactobacillus;s__	taxonomic classification defined by topology and ANI	topological placement and ANI have congruent species assignments	GCF_002157585.1, s__Lentilactobacillus parakefiri, 95.0, 85.71, 0.77; GCF_001434145.1, s__Lentilactobacillus otakiensis, 95.0, 83.23, 0.68; GCF_007989105.1, s__Lentilactobacillus kefiri, 95.0, 82.0, 0.59; GCF_001435575.1, s__Lentilactobacillus sunkii, 95.0, 81.94, 0.63; GCF_001435315.1, s__Lentilactobacillus parabuchneri, 95.0, 81.17, 0.57; GCF_001434255.1, s__Lentilactobacillus diolivorans, 95.0…	93.69	11	N/A	N/A
C15C_bin.2	d__Bacteria;p__Firmicutes;c__Bacilli;o__Lactobacillales;f__Lactobacillaceae;g__Lentilactobacillus;s__Lentilactobacillus buchneri	GCF_018314255.1	95	d__Bacteria;p__Firmicutes;c__Bacilli;o__Lactobacillales;f__Lactobacillaceae;g__Lentilactobacillus;s__Lentilactobacillus buchneri	97.56	0.96	GCF_018314255.1	95	d__Bacteria;p__Firmicutes;c__Bacilli;o__Lactobacillales;f__Lactobacillaceae;g__Lentilactobacillus;s__Lentilactobacillus buchneri	97.56	0.96	d__Bacteria;p__Firmicutes;c__Bacilli;o__Lactobacillales;f__Lactobacillaceae;g__Lentilactobacillus;s__	taxonomic classification defined by topology and ANI	topological placement and ANI have congruent species assignments	GCF_002157585.1, s__Lentilactobacillus parakefiri, 95.0, 86.44, 0.83; GCF_001434145.1, s__Lentilactobacillus otakiensis, 95.0, 84.17, 0.72; GCF_001435575.1, s__Lentilactobacillus sunkii, 95.0, 83.07, 0.68; GCF_007989105.1, s__Lentilactobacillus kefiri, 95.0, 83.02, 0.68; GCF_001435315.1, s__Lentilactobacillus parabuchneri, 95.0, 81.99, 0.65; GCF_019061365.1, s__Lentilactobacillus sp019061365, 95.…	88.36	11	N/A	N/A
C40A_bin.1	d__Bacteria;p__Firmicutes;c__Bacilli;o__Lactobacillales;f__Lactobacillaceae;g__Lentilactobacillus;s__Lentilactobacillus buchneri	GCF_018314255.1	95	d__Bacteria;p__Firmicutes;c__Bacilli;o__Lactobacillales;f__Lactobacillaceae;g__Lentilactobacillus;s__Lentilactobacillus buchneri	97.17	0.92	GCF_018314255.1	95	d__Bacteria;p__Firmicutes;c__Bacilli;o__Lactobacillales;f__Lactobacillaceae;g__Lentilactobacillus;s__Lentilactobacillus buchneri	97.17	0.92	d__Bacteria;p__Firmicutes;c__Bacilli;o__Lactobacillales;f__Lactobacillaceae;g__Lentilactobacillus;s__	taxonomic classification defined by topology and ANI	topological placement and ANI have congruent species assignments	GCF_002157585.1, s__Lentilactobacillus parakefiri, 95.0, 85.78, 0.76; GCF_001434145.1, s__Lentilactobacillus otakiensis, 95.0, 83.2, 0.68; GCF_001435575.1, s__Lentilactobacillus sunkii, 95.0, 82.04, 0.63; GCF_007989105.1, s__Lentilactobacillus kefiri, 95.0, 82.0, 0.6; GCF_001435315.1, s__Lentilactobacillus parabuchneri, 95.0, 81.2, 0.6; GCF_019061365.1, s__Lentilactobacillus sp019061365, 95.0, 79…	94.64	11	N/A	N/A
C40B_bin.2	d__Bacteria;p__Firmicutes;c__Bacilli;o__Lactobacillales;f__Lactobacillaceae;g__Lentilactobacillus;s__Lentilactobacillus buchneri	GCF_018314255.1	95	d__Bacteria;p__Firmicutes;c__Bacilli;o__Lactobacillales;f__Lactobacillaceae;g__Lentilactobacillus;s__Lentilactobacillus buchneri	97.24	0.94	GCF_018314255.1	95	d__Bacteria;p__Firmicutes;c__Bacilli;o__Lactobacillales;f__Lactobacillaceae;g__Lentilactobacillus;s__Lentilactobacillus buchneri	97.24	0.94	d__Bacteria;p__Firmicutes;c__Bacilli;o__Lactobacillales;f__Lactobacillaceae;g__Lentilactobacillus;s__	taxonomic classification defined by topology and ANI	topological placement and ANI have congruent species assignments	GCF_002157585.1, s__Lentilactobacillus parakefiri, 95.0, 85.81, 0.78; GCF_001434145.1, s__Lentilactobacillus otakiensis, 95.0, 83.2, 0.67; GCF_007989105.1, s__Lentilactobacillus kefiri, 95.0, 82.06, 0.6; GCF_001435575.1, s__Lentilactobacillus sunkii, 95.0, 82.02, 0.67; GCF_001435315.1, s__Lentilactobacillus parabuchneri, 95.0, 81.18, 0.59; GCF_019061365.1, s__Lentilactobacillus sp019061365, 95.0,…	94.64	11	N/A	N/A
C40C_bin.10	d__Bacteria;p__Firmicutes;c__Bacilli;o__Lactobacillales;f__Lactobacillaceae;g__Lentilactobacillus;s__Lentilactobacillus buchneri	GCF_018314255.1	95	d__Bacteria;p__Firmicutes;c__Bacilli;o__Lactobacillales;f__Lactobacillaceae;g__Lentilactobacillus;s__Lentilactobacillus buchneri	97.21	0.93	GCF_018314255.1	95	d__Bacteria;p__Firmicutes;c__Bacilli;o__Lactobacillales;f__Lactobacillaceae;g__Lentilactobacillus;s__Lentilactobacillus buchneri	97.21	0.93	d__Bacteria;p__Firmicutes;c__Bacilli;o__Lactobacillales;f__Lactobacillaceae;g__Lentilactobacillus;s__	taxonomic classification defined by topology and ANI	topological placement and ANI have congruent species assignments	GCF_002157585.1, s__Lentilactobacillus parakefiri, 95.0, 85.79, 0.77; GCF_001434145.1, s__Lentilactobacillus otakiensis, 95.0, 83.13, 0.68; GCF_007989105.1, s__Lentilactobacillus kefiri, 95.0, 82.03, 0.6; GCF_001435575.1, s__Lentilactobacillus sunkii, 95.0, 82.01, 0.66; GCF_001435315.1, s__Lentilactobacillus parabuchneri, 95.0, 81.16, 0.59; GCF_019061365.1, s__Lentilactobacillus sp019061365, 95.0…	94.64	11	N/A	N/A
C8A_bin.5	d__Bacteria;p__Firmicutes;c__Bacilli;o__Lactobacillales;f__Lactobacillaceae;g__Lentilactobacillus;s__Lentilactobacillus buchneri	GCF_018314255.1	95	d__Bacteria;p__Firmicutes;c__Bacilli;o__Lactobacillales;f__Lactobacillaceae;g__Lentilactobacillus;s__Lentilactobacillus buchneri	97.17	0.92	GCF_018314255.1	95	d__Bacteria;p__Firmicutes;c__Bacilli;o__Lactobacillales;f__Lactobacillaceae;g__Lentilactobacillus;s__Lentilactobacillus buchneri	97.17	0.92	d__Bacteria;p__Firmicutes;c__Bacilli;o__Lactobacillales;f__Lactobacillaceae;g__Lentilactobacillus;s__	taxonomic classification defined by topology and ANI	topological placement and ANI have congruent species assignments	GCF_002157585.1, s__Lentilactobacillus parakefiri, 95.0, 85.62, 0.75; GCF_001434145.1, s__Lentilactobacillus otakiensis, 95.0, 83.11, 0.66; GCF_007989105.1, s__Lentilactobacillus kefiri, 95.0, 81.86, 0.58; GCF_001435575.1, s__Lentilactobacillus sunkii, 95.0, 81.79, 0.63; GCF_001435315.1, s__Lentilactobacillus parabuchneri, 95.0, 80.98, 0.58; GCF_019061365.1, s__Lentilactobacillus sp019061365, 95.…	77.66	11	N/A	N/A
C8B_bin.3	d__Bacteria;p__Firmicutes;c__Bacilli;o__Lactobacillales;f__Lactobacillaceae;g__Lentilactobacillus;s__Lentilactobacillus buchneri	GCF_018314255.1	95	d__Bacteria;p__Firmicutes;c__Bacilli;o__Lactobacillales;f__Lactobacillaceae;g__Lentilactobacillus;s__Lentilactobacillus buchneri	97.25	0.93	GCF_018314255.1	95	d__Bacteria;p__Firmicutes;c__Bacilli;o__Lactobacillales;f__Lactobacillaceae;g__Lentilactobacillus;s__Lentilactobacillus buchneri	97.25	0.93	d__Bacteria;p__Firmicutes;c__Bacilli;o__Lactobacillales;f__Lactobacillaceae;g__Lentilactobacillus;s__	taxonomic classification defined by topology and ANI	topological placement and ANI have congruent species assignments	GCF_002157585.1, s__Lentilactobacillus parakefiri, 95.0, 85.79, 0.76; GCF_001434145.1, s__Lentilactobacillus otakiensis, 95.0, 83.3, 0.68; GCF_001435575.1, s__Lentilactobacillus sunkii, 95.0, 82.0, 0.64; GCF_007989105.1, s__Lentilactobacillus kefiri, 95.0, 81.95, 0.6; GCF_001435315.1, s__Lentilactobacillus parabuchneri, 95.0, 81.15, 0.59; GCF_019061365.1, s__Lentilactobacillus sp019061365, 95.0, …	94.56	11	N/A	N/A
C8C_bin.8	d__Bacteria;p__Firmicutes;c__Bacilli;o__Lactobacillales;f__Lactobacillaceae;g__Lentilactobacillus;s__Lentilactobacillus buchneri	GCF_018314255.1	95	d__Bacteria;p__Firmicutes;c__Bacilli;o__Lactobacillales;f__Lactobacillaceae;g__Lentilactobacillus;s__Lentilactobacillus buchneri	97.21	0.93	GCF_018314255.1	95	d__Bacteria;p__Firmicutes;c__Bacilli;o__Lactobacillales;f__Lactobacillaceae;g__Lentilactobacillus;s__Lentilactobacillus buchneri	97.21	0.93	d__Bacteria;p__Firmicutes;c__Bacilli;o__Lactobacillales;f__Lactobacillaceae;g__Lentilactobacillus;s__	taxonomic classification defined by topology and ANI	topological placement and ANI have congruent species assignments	GCF_002157585.1, s__Lentilactobacillus parakefiri, 95.0, 85.72, 0.77; GCF_001434145.1, s__Lentilactobacillus otakiensis, 95.0, 83.25, 0.67; GCF_001435575.1, s__Lentilactobacillus sunkii, 95.0, 82.09, 0.64; GCF_007989105.1, s__Lentilactobacillus kefiri, 95.0, 81.99, 0.6; GCF_001435315.1, s__Lentilactobacillus parabuchneri, 95.0, 81.13, 0.59; GCF_019061365.1, s__Lentilactobacillus sp019061365, 95.0…	94.5	11	N/A	N/A
C15A_bin.5	d__Bacteria;p__Firmicutes;c__Bacilli;o__Lactobacillales;f__Lactobacillaceae;g__Lentilactobacillus;s__Lentilactobacillus diolivorans	GCF_001434255.1	95	d__Bacteria;p__Firmicutes;c__Bacilli;o__Lactobacillales;f__Lactobacillaceae;g__Lentilactobacillus;s__Lentilactobacillus diolivorans	99.97	0.97	GCF_001434255.1	95	d__Bacteria;p__Firmicutes;c__Bacilli;o__Lactobacillales;f__Lactobacillaceae;g__Lentilactobacillus;s__Lentilactobacillus diolivorans	99.97	0.97	d__Bacteria;p__Firmicutes;c__Bacilli;o__Lactobacillales;f__Lactobacillaceae;g__Lentilactobacillus;s__	taxonomic classification defined by topology and ANI	topological placement and ANI have congruent species assignments	GCF_001435315.1, s__Lentilactobacillus parabuchneri, 95.0, 80.29, 0.23; GCF_001435575.1, s__Lentilactobacillus sunkii, 95.0, 80.2, 0.25; GCF_007989105.1, s__Lentilactobacillus kefiri, 95.0, 80.08, 0.27; GCF_001434145.1, s__Lentilactobacillus otakiensis, 95.0, 79.97, 0.27; GCF_018314255.1, s__Lentilactobacillus buchneri, 95.0, 79.93, 0.26; GCF_019061365.1, s__Lentilactobacillus sp019061365, 95.0, …	89.87	11	N/A	N/A
C15B_bin.7	d__Bacteria;p__Firmicutes;c__Bacilli;o__Lactobacillales;f__Lactobacillaceae;g__Lentilactobacillus;s__Lentilactobacillus diolivorans	GCF_001434255.1	95	d__Bacteria;p__Firmicutes;c__Bacilli;o__Lactobacillales;f__Lactobacillaceae;g__Lentilactobacillus;s__Lentilactobacillus diolivorans	99.99	0.97	GCF_001434255.1	95	d__Bacteria;p__Firmicutes;c__Bacilli;o__Lactobacillales;f__Lactobacillaceae;g__Lentilactobacillus;s__Lentilactobacillus diolivorans	99.99	0.97	d__Bacteria;p__Firmicutes;c__Bacilli;o__Lactobacillales;f__Lactobacillaceae;g__Lentilactobacillus;s__	taxonomic classification defined by topology and ANI	topological placement and ANI have congruent species assignments	GCF_001435315.1, s__Lentilactobacillus parabuchneri, 95.0, 79.46, 0.26; GCF_001434145.1, s__Lentilactobacillus otakiensis, 95.0, 79.45, 0.3; GCF_001435575.1, s__Lentilactobacillus sunkii, 95.0, 79.19, 0.27; GCF_019061365.1, s__Lentilactobacillus sp019061365, 95.0, 79.16, 0.27; GCF_000159315.1, s__Lentilactobacillus hilgardii, 95.0, 79.16, 0.29; GCF_007989105.1, s__Lentilactobacillus kefiri, 95.0,…	93.23	11	N/A	N/A
C15C_bin.4	d__Bacteria;p__Firmicutes;c__Bacilli;o__Lactobacillales;f__Lactobacillaceae;g__Lentilactobacillus;s__Lentilactobacillus diolivorans	GCF_001434255.1	95	d__Bacteria;p__Firmicutes;c__Bacilli;o__Lactobacillales;f__Lactobacillaceae;g__Lentilactobacillus;s__Lentilactobacillus diolivorans	100	1	GCF_001434255.1	95	d__Bacteria;p__Firmicutes;c__Bacilli;o__Lactobacillales;f__Lactobacillaceae;g__Lentilactobacillus;s__Lentilactobacillus diolivorans	100	1	d__Bacteria;p__Firmicutes;c__Bacilli;o__Lactobacillales;f__Lactobacillaceae;g__Lentilactobacillus;s__	taxonomic classification defined by topology and ANI	topological placement and ANI have congruent species assignments	GCF_001434145.1, s__Lentilactobacillus otakiensis, 95.0, 79.03, 0.35; GCF_001435315.1, s__Lentilactobacillus parabuchneri, 95.0, 79.01, 0.34; GCF_002157585.1, s__Lentilactobacillus parakefiri, 95.0, 78.74, 0.3; GCF_007989105.1, s__Lentilactobacillus kefiri, 95.0, 78.73, 0.36; GCF_000159315.1, s__Lentilactobacillus hilgardii, 95.0, 78.68, 0.36; GCF_001435575.1, s__Lentilactobacillus sunkii, 95.0, …	71.25	11	N/A	N/A
C40A_bin.5	d__Bacteria;p__Firmicutes;c__Bacilli;o__Lactobacillales;f__Lactobacillaceae;g__Lentilactobacillus;s__Lentilactobacillus diolivorans	GCF_001434255.1	95	d__Bacteria;p__Firmicutes;c__Bacilli;o__Lactobacillales;f__Lactobacillaceae;g__Lentilactobacillus;s__Lentilactobacillus diolivorans	100	0.98	GCF_001434255.1	95	d__Bacteria;p__Firmicutes;c__Bacilli;o__Lactobacillales;f__Lactobacillaceae;g__Lentilactobacillus;s__Lentilactobacillus diolivorans	100	0.98	d__Bacteria;p__Firmicutes;c__Bacilli;o__Lactobacillales;f__Lactobacillaceae;g__Lentilactobacillus;s__	taxonomic classification defined by topology and ANI	topological placement and ANI have congruent species assignments	GCF_001434145.1, s__Lentilactobacillus otakiensis, 95.0, 78.83, 0.3; GCF_001435315.1, s__Lentilactobacillus parabuchneri, 95.0, 78.81, 0.26; GCF_000159315.1, s__Lentilactobacillus hilgardii, 95.0, 78.73, 0.29; GCF_002157585.1, s__Lentilactobacillus parakefiri, 95.0, 78.68, 0.26; GCF_018314255.1, s__Lentilactobacillus buchneri, 95.0, 78.66, 0.27; GCF_007989105.1, s__Lentilactobacillus kefiri, 95.0…	93.23	11	N/A	N/A
C40B_bin.6	d__Bacteria;p__Firmicutes;c__Bacilli;o__Lactobacillales;f__Lactobacillaceae;g__Lentilactobacillus;s__Lentilactobacillus diolivorans	GCF_001434255.1	95	d__Bacteria;p__Firmicutes;c__Bacilli;o__Lactobacillales;f__Lactobacillaceae;g__Lentilactobacillus;s__Lentilactobacillus diolivorans	99.96	0.98	GCF_001434255.1	95	d__Bacteria;p__Firmicutes;c__Bacilli;o__Lactobacillales;f__Lactobacillaceae;g__Lentilactobacillus;s__Lentilactobacillus diolivorans	99.96	0.98	d__Bacteria;p__Firmicutes;c__Bacilli;o__Lactobacillales;f__Lactobacillaceae;g__Lentilactobacillus;s__	taxonomic classification defined by topology and ANI	topological placement and ANI have congruent species assignments	GCF_001435315.1, s__Lentilactobacillus parabuchneri, 95.0, 79.05, 0.26; GCF_001434145.1, s__Lentilactobacillus otakiensis, 95.0, 78.91, 0.3; GCF_007989105.1, s__Lentilactobacillus kefiri, 95.0, 78.81, 0.3; GCF_002157585.1, s__Lentilactobacillus parakefiri, 95.0, 78.79, 0.26; GCF_000159315.1, s__Lentilactobacillus hilgardii, 95.0, 78.78, 0.29; GCF_019061365.1, s__Lentilactobacillus sp019061365, 95…	93.23	11	N/A	N/A
C40C_bin.5	d__Bacteria;p__Firmicutes;c__Bacilli;o__Lactobacillales;f__Lactobacillaceae;g__Lentilactobacillus;s__Lentilactobacillus diolivorans	GCF_001434255.1	95	d__Bacteria;p__Firmicutes;c__Bacilli;o__Lactobacillales;f__Lactobacillaceae;g__Lentilactobacillus;s__Lentilactobacillus diolivorans	100	0.98	GCF_001434255.1	95	d__Bacteria;p__Firmicutes;c__Bacilli;o__Lactobacillales;f__Lactobacillaceae;g__Lentilactobacillus;s__Lentilactobacillus diolivorans	100	0.98	d__Bacteria;p__Firmicutes;c__Bacilli;o__Lactobacillales;f__Lactobacillaceae;g__Lentilactobacillus;s__	taxonomic classification defined by topology and ANI	topological placement and ANI have congruent species assignments	GCF_001435315.1, s__Lentilactobacillus parabuchneri, 95.0, 78.86, 0.25; GCF_001434145.1, s__Lentilactobacillus otakiensis, 95.0, 78.83, 0.3; GCF_000159315.1, s__Lentilactobacillus hilgardii, 95.0, 78.73, 0.28; GCF_007989105.1, s__Lentilactobacillus kefiri, 95.0, 78.7, 0.3; GCF_002157585.1, s__Lentilactobacillus parakefiri, 95.0, 78.67, 0.26; GCF_018314255.1, s__Lentilactobacillus buchneri, 95.0, …	93.23	11	N/A	N/A
C8B_bin.7	d__Bacteria;p__Firmicutes;c__Bacilli;o__Lactobacillales;f__Lactobacillaceae;g__Lentilactobacillus;s__Lentilactobacillus diolivorans	GCF_001434255.1	95	d__Bacteria;p__Firmicutes;c__Bacilli;o__Lactobacillales;f__Lactobacillaceae;g__Lentilactobacillus;s__Lentilactobacillus diolivorans	99.99	0.97	GCF_001434255.1	95	d__Bacteria;p__Firmicutes;c__Bacilli;o__Lactobacillales;f__Lactobacillaceae;g__Lentilactobacillus;s__Lentilactobacillus diolivorans	99.99	0.97	d__Bacteria;p__Firmicutes;c__Bacilli;o__Lactobacillales;f__Lactobacillaceae;g__Lentilactobacillus;s__	taxonomic classification defined by topology and ANI	topological placement and ANI have congruent species assignments	GCF_001434145.1, s__Lentilactobacillus otakiensis, 95.0, 78.89, 0.3; GCF_001435315.1, s__Lentilactobacillus parabuchneri, 95.0, 78.88, 0.25; GCF_000159315.1, s__Lentilactobacillus hilgardii, 95.0, 78.86, 0.29; GCF_002157585.1, s__Lentilactobacillus parakefiri, 95.0, 78.74, 0.26; GCF_001435575.1, s__Lentilactobacillus sunkii, 95.0, 78.73, 0.26; GCF_018314255.1, s__Lentilactobacillus buchneri, 95.0…	92.75	11	N/A	N/A
C8C_bin.6	d__Bacteria;p__Firmicutes;c__Bacilli;o__Lactobacillales;f__Lactobacillaceae;g__Lentilactobacillus;s__Lentilactobacillus diolivorans	GCF_001434255.1	95	d__Bacteria;p__Firmicutes;c__Bacilli;o__Lactobacillales;f__Lactobacillaceae;g__Lentilactobacillus;s__Lentilactobacillus diolivorans	99.99	0.97	GCF_001434255.1	95	d__Bacteria;p__Firmicutes;c__Bacilli;o__Lactobacillales;f__Lactobacillaceae;g__Lentilactobacillus;s__Lentilactobacillus diolivorans	99.99	0.97	d__Bacteria;p__Firmicutes;c__Bacilli;o__Lactobacillales;f__Lactobacillaceae;g__Lentilactobacillus;s__	taxonomic classification defined by topology and ANI	topological placement and ANI have congruent species assignments	GCF_001435315.1, s__Lentilactobacillus parabuchneri, 95.0, 79.17, 0.22; GCF_001434145.1, s__Lentilactobacillus otakiensis, 95.0, 79.01, 0.26; GCF_002157585.1, s__Lentilactobacillus parakefiri, 95.0, 78.87, 0.22; GCF_018314255.1, s__Lentilactobacillus buchneri, 95.0, 78.84, 0.24; GCF_001435575.1, s__Lentilactobacillus sunkii, 95.0, 78.75, 0.23; GCF_007989105.1, s__Lentilactobacillus kefiri, 95.0, …	89.87	11	N/A	N/A
C4B_bin.1	d__Bacteria;p__Firmicutes;c__Bacilli;o__Lactobacillales;f__Lactobacillaceae;g__Leuconostoc;s__Leuconostoc citreum	GCF_004354555.1	95	d__Bacteria;p__Firmicutes;c__Bacilli;o__Lactobacillales;f__Lactobacillaceae;g__Leuconostoc;s__Leuconostoc citreum	99.04	0.91	GCF_004354555.1	95	d__Bacteria;p__Firmicutes;c__Bacilli;o__Lactobacillales;f__Lactobacillaceae;g__Leuconostoc;s__Leuconostoc citreum	99.04	0.91	d__Bacteria;p__Firmicutes;c__Bacilli;o__Lactobacillales;f__Lactobacillaceae;g__Leuconostoc;s__	taxonomic classification defined by topology and ANI	topological placement and ANI have congruent species assignments	GCF_007954625.1, s__Leuconostoc lactis_A, 95.0, 78.87, 0.32; GCF_014651235.1, s__Leuconostoc lactis, 95.0, 78.87, 0.32; GCA_900554745.1, s__Leuconostoc sp900554745, 95.0, 78.43, 0.2; GCF_000014445.1, s__Leuconostoc mesenteroides, 95.0, 78.38, 0.26; GCF_012396485.1, s__Leuconostoc holzapfelii, 95.0, 78.33, 0.31; GCF_016908715.1, s__Leuconostoc rapi, 95.0, 78.31, 0.37; GCF_000166715.1, s__Leuconost…	56.41	11	N/A	N/A
C15A_bin.2	d__Bacteria;p__Firmicutes;c__Bacilli;o__Lactobacillales;f__Lactobacillaceae;g__Leuconostoc;s__Leuconostoc pseudomesenteroides	GCF_014634745.1	95	d__Bacteria;p__Firmicutes;c__Bacilli;o__Lactobacillales;f__Lactobacillaceae;g__Leuconostoc;s__Leuconostoc pseudomesenteroides	96.7	0.84	GCF_014634745.1	95	d__Bacteria;p__Firmicutes;c__Bacilli;o__Lactobacillales;f__Lactobacillaceae;g__Leuconostoc;s__Leuconostoc pseudomesenteroides	96.7	0.84	d__Bacteria;p__Firmicutes;c__Bacilli;o__Lactobacillales;f__Lactobacillaceae;g__Leuconostoc;s__	taxonomic classification defined by topology and ANI	topological placement and ANI have congruent species assignments	GCF_014634805.1, s__Leuconostoc falkenbergense, 95.0, 92.8, 0.85; GCF_000014445.1, s__Leuconostoc mesenteroides, 95.0, 80.77, 0.34; GCF_014651235.1, s__Leuconostoc lactis, 95.0, 80.5, 0.28; GCF_001891125.1, s__Leuconostoc suionicum, 95.0, 80.34, 0.32; GCF_009676745.1, s__Leuconostoc mesenteroides_B, 95.0, 80.24, 0.36; GCF_000092505.1, s__Leuconostoc kimchii, 95.0, 79.84, 0.25; GCF_007954625.1, s_…	95.04	11	N/A	N/A
C15B_bin.3	d__Bacteria;p__Firmicutes;c__Bacilli;o__Lactobacillales;f__Lactobacillaceae;g__Leuconostoc;s__Leuconostoc pseudomesenteroides	GCF_014634745.1	95	d__Bacteria;p__Firmicutes;c__Bacilli;o__Lactobacillales;f__Lactobacillaceae;g__Leuconostoc;s__Leuconostoc pseudomesenteroides	96.65	0.85	GCF_014634745.1	95	d__Bacteria;p__Firmicutes;c__Bacilli;o__Lactobacillales;f__Lactobacillaceae;g__Leuconostoc;s__Leuconostoc pseudomesenteroides	96.65	0.85	d__Bacteria;p__Firmicutes;c__Bacilli;o__Lactobacillales;f__Lactobacillaceae;g__Leuconostoc;s__	taxonomic classification defined by topology and ANI	topological placement and ANI have congruent species assignments	GCF_014634805.1, s__Leuconostoc falkenbergense, 95.0, 92.75, 0.85; GCF_000014445.1, s__Leuconostoc mesenteroides, 95.0, 80.88, 0.35; GCF_001891125.1, s__Leuconostoc suionicum, 95.0, 80.62, 0.33; GCF_014651235.1, s__Leuconostoc lactis, 95.0, 80.59, 0.27; GCF_009676745.1, s__Leuconostoc mesenteroides_B, 95.0, 80.5, 0.37; GCF_007954625.1, s__Leuconostoc lactis_A, 95.0, 79.85, 0.24; GCF_000092505.1, …	95.04	11	N/A	N/A
C15C_bin.6	d__Bacteria;p__Firmicutes;c__Bacilli;o__Lactobacillales;f__Lactobacillaceae;g__Leuconostoc;s__Leuconostoc pseudomesenteroides	GCF_014634745.1	95	d__Bacteria;p__Firmicutes;c__Bacilli;o__Lactobacillales;f__Lactobacillaceae;g__Leuconostoc;s__Leuconostoc pseudomesenteroides	96.76	0.81	GCF_014634745.1	95	d__Bacteria;p__Firmicutes;c__Bacilli;o__Lactobacillales;f__Lactobacillaceae;g__Leuconostoc;s__Leuconostoc pseudomesenteroides	96.76	0.81	d__Bacteria;p__Firmicutes;c__Bacilli;o__Lactobacillales;f__Lactobacillaceae;g__Leuconostoc;s__	taxonomic classification defined by topology and ANI	topological placement and ANI have congruent species assignments	GCF_014634805.1, s__Leuconostoc falkenbergense, 95.0, 92.74, 0.82; GCF_000014445.1, s__Leuconostoc mesenteroides, 95.0, 80.59, 0.34; GCF_014651235.1, s__Leuconostoc lactis, 95.0, 80.23, 0.27; GCF_001891125.1, s__Leuconostoc suionicum, 95.0, 80.2, 0.3; GCF_009676745.1, s__Leuconostoc mesenteroides_B, 95.0, 80.03, 0.35; GCF_000092505.1, s__Leuconostoc kimchii, 95.0, 79.66, 0.24; GCF_008107645.1, s_…	84.75	11	N/A	N/A
C2A_bin.1	d__Bacteria;p__Firmicutes;c__Bacilli;o__Lactobacillales;f__Lactobacillaceae;g__Leuconostoc;s__Leuconostoc pseudomesenteroides	GCF_014634745.1	95	d__Bacteria;p__Firmicutes;c__Bacilli;o__Lactobacillales;f__Lactobacillaceae;g__Leuconostoc;s__Leuconostoc pseudomesenteroides	96.77	0.87	GCF_014634745.1	95	d__Bacteria;p__Firmicutes;c__Bacilli;o__Lactobacillales;f__Lactobacillaceae;g__Leuconostoc;s__Leuconostoc pseudomesenteroides	96.77	0.87	d__Bacteria;p__Firmicutes;c__Bacilli;o__Lactobacillales;f__Lactobacillaceae;g__Leuconostoc;s__	taxonomic classification defined by topology and ANI	topological placement and ANI have congruent species assignments	GCF_014634805.1, s__Leuconostoc falkenbergense, 95.0, 92.61, 0.8; GCF_001891125.1, s__Leuconostoc suionicum, 95.0, 79.6, 0.31; GCF_000014445.1, s__Leuconostoc mesenteroides, 95.0, 79.38, 0.31; GCF_014651235.1, s__Leuconostoc lactis, 95.0, 79.22, 0.21; GCF_007954625.1, s__Leuconostoc lactis_A, 95.0, 79.12, 0.22; GCF_008107645.1, s__Leuconostoc litchii, 95.0, 78.87, 0.3; GCF_012396485.1, s__Leucono…	76.95	11	N/A	N/A
C2C_bin.2	d__Bacteria;p__Firmicutes;c__Bacilli;o__Lactobacillales;f__Lactobacillaceae;g__Leuconostoc;s__Leuconostoc pseudomesenteroides	GCF_014634745.1	95	d__Bacteria;p__Firmicutes;c__Bacilli;o__Lactobacillales;f__Lactobacillaceae;g__Leuconostoc;s__Leuconostoc pseudomesenteroides	96.74	0.84	GCF_014634745.1	95	d__Bacteria;p__Firmicutes;c__Bacilli;o__Lactobacillales;f__Lactobacillaceae;g__Leuconostoc;s__Leuconostoc pseudomesenteroides	96.74	0.84	d__Bacteria;p__Firmicutes;c__Bacilli;o__Lactobacillales;f__Lactobacillaceae;g__Leuconostoc;s__	taxonomic classification defined by topology and ANI	topological placement and ANI have congruent species assignments	GCF_014634805.1, s__Leuconostoc falkenbergense, 95.0, 92.65, 0.85; GCF_000014445.1, s__Leuconostoc mesenteroides, 95.0, 80.98, 0.35; GCF_014651235.1, s__Leuconostoc lactis, 95.0, 80.74, 0.28; GCF_001891125.1, s__Leuconostoc suionicum, 95.0, 80.5, 0.32; GCF_009676745.1, s__Leuconostoc mesenteroides_B, 95.0, 80.44, 0.37; GCF_007954625.1, s__Leuconostoc lactis_A, 95.0, 80.06, 0.26; GCF_000092505.1, …	94.16	11	N/A	N/A
C40A_bin.4	d__Bacteria;p__Firmicutes;c__Bacilli;o__Lactobacillales;f__Lactobacillaceae;g__Leuconostoc;s__Leuconostoc pseudomesenteroides	GCF_014634745.1	95	d__Bacteria;p__Firmicutes;c__Bacilli;o__Lactobacillales;f__Lactobacillaceae;g__Leuconostoc;s__Leuconostoc pseudomesenteroides	96.65	0.85	GCF_014634745.1	95	d__Bacteria;p__Firmicutes;c__Bacilli;o__Lactobacillales;f__Lactobacillaceae;g__Leuconostoc;s__Leuconostoc pseudomesenteroides	96.65	0.85	d__Bacteria;p__Firmicutes;c__Bacilli;o__Lactobacillales;f__Lactobacillaceae;g__Leuconostoc;s__	taxonomic classification defined by topology and ANI	topological placement and ANI have congruent species assignments	GCF_014634805.1, s__Leuconostoc falkenbergense, 95.0, 92.67, 0.86; GCF_000014445.1, s__Leuconostoc mesenteroides, 95.0, 80.98, 0.35; GCF_001891125.1, s__Leuconostoc suionicum, 95.0, 80.6, 0.32; GCF_014651235.1, s__Leuconostoc lactis, 95.0, 80.55, 0.28; GCF_009676745.1, s__Leuconostoc mesenteroides_B, 95.0, 80.41, 0.37; GCF_007954625.1, s__Leuconostoc lactis_A, 95.0, 79.97, 0.25; GCF_008107645.1, …	95.04	11	N/A	N/A
C40B_bin.4	d__Bacteria;p__Firmicutes;c__Bacilli;o__Lactobacillales;f__Lactobacillaceae;g__Leuconostoc;s__Leuconostoc pseudomesenteroides	GCF_014634745.1	95	d__Bacteria;p__Firmicutes;c__Bacilli;o__Lactobacillales;f__Lactobacillaceae;g__Leuconostoc;s__Leuconostoc pseudomesenteroides	96.99	0.89	GCF_014634745.1	95	d__Bacteria;p__Firmicutes;c__Bacilli;o__Lactobacillales;f__Lactobacillaceae;g__Leuconostoc;s__Leuconostoc pseudomesenteroides	96.99	0.89	d__Bacteria;p__Firmicutes;c__Bacilli;o__Lactobacillales;f__Lactobacillaceae;g__Leuconostoc;s__	taxonomic classification defined by topology and ANI	topological placement and ANI have congruent species assignments	GCF_014634805.1, s__Leuconostoc falkenbergense, 95.0, 92.64, 0.81; GCF_000014445.1, s__Leuconostoc mesenteroides, 95.0, 79.69, 0.33; GCF_001891125.1, s__Leuconostoc suionicum, 95.0, 79.57, 0.32; GCF_014651235.1, s__Leuconostoc lactis, 95.0, 79.42, 0.23; GCF_008107645.1, s__Leuconostoc litchii, 95.0, 79.33, 0.3; GCF_007954625.1, s__Leuconostoc lactis_A, 95.0, 79.24, 0.23; GCF_009676745.1, s__Leuco…	76.35	11	N/A	N/A
C40C_bin.4	d__Bacteria;p__Firmicutes;c__Bacilli;o__Lactobacillales;f__Lactobacillaceae;g__Leuconostoc;s__Leuconostoc pseudomesenteroides	GCF_014634745.1	95	d__Bacteria;p__Firmicutes;c__Bacilli;o__Lactobacillales;f__Lactobacillaceae;g__Leuconostoc;s__Leuconostoc pseudomesenteroides	96.79	0.87	GCF_014634745.1	95	d__Bacteria;p__Firmicutes;c__Bacilli;o__Lactobacillales;f__Lactobacillaceae;g__Leuconostoc;s__Leuconostoc pseudomesenteroides	96.79	0.87	d__Bacteria;p__Firmicutes;c__Bacilli;o__Lactobacillales;f__Lactobacillaceae;g__Leuconostoc;s__	taxonomic classification defined by topology and ANI	topological placement and ANI have congruent species assignments	GCF_014634805.1, s__Leuconostoc falkenbergense, 95.0, 92.83, 0.81; GCF_000014445.1, s__Leuconostoc mesenteroides, 95.0, 80.73, 0.35; GCF_014651235.1, s__Leuconostoc lactis, 95.0, 80.41, 0.27; GCF_001891125.1, s__Leuconostoc suionicum, 95.0, 80.37, 0.31; GCF_009676745.1, s__Leuconostoc mesenteroides_B, 95.0, 80.36, 0.35; GCF_000092505.1, s__Leuconostoc kimchii, 95.0, 79.86, 0.27; GCF_008107645.1, …	95.04	11	N/A	N/A
C4A_bin.3	d__Bacteria;p__Firmicutes;c__Bacilli;o__Lactobacillales;f__Lactobacillaceae;g__Leuconostoc;s__Leuconostoc pseudomesenteroides	GCF_014634745.1	95	d__Bacteria;p__Firmicutes;c__Bacilli;o__Lactobacillales;f__Lactobacillaceae;g__Leuconostoc;s__Leuconostoc pseudomesenteroides	96.81	0.84	GCF_014634745.1	95	d__Bacteria;p__Firmicutes;c__Bacilli;o__Lactobacillales;f__Lactobacillaceae;g__Leuconostoc;s__Leuconostoc pseudomesenteroides	96.81	0.84	d__Bacteria;p__Firmicutes;c__Bacilli;o__Lactobacillales;f__Lactobacillaceae;g__Leuconostoc;s__	taxonomic classification defined by topology and ANI	topological placement and ANI have congruent species assignments	GCF_014634805.1, s__Leuconostoc falkenbergense, 95.0, 92.84, 0.82; GCF_000014445.1, s__Leuconostoc mesenteroides, 95.0, 80.83, 0.33; GCF_001891125.1, s__Leuconostoc suionicum, 95.0, 80.51, 0.32; GCF_014651235.1, s__Leuconostoc lactis, 95.0, 80.41, 0.27; GCF_009676745.1, s__Leuconostoc mesenteroides_B, 95.0, 80.34, 0.35; GCF_008107645.1, s__Leuconostoc litchii, 95.0, 79.98, 0.33; GCF_000092505.1, …	94.82	11	N/A	N/A
C4B_bin.4	d__Bacteria;p__Firmicutes;c__Bacilli;o__Lactobacillales;f__Lactobacillaceae;g__Leuconostoc;s__Leuconostoc pseudomesenteroides	GCF_014634745.1	95	d__Bacteria;p__Firmicutes;c__Bacilli;o__Lactobacillales;f__Lactobacillaceae;g__Leuconostoc;s__Leuconostoc pseudomesenteroides	96.74	0.85	GCF_014634745.1	95	d__Bacteria;p__Firmicutes;c__Bacilli;o__Lactobacillales;f__Lactobacillaceae;g__Leuconostoc;s__Leuconostoc pseudomesenteroides	96.74	0.85	d__Bacteria;p__Firmicutes;c__Bacilli;o__Lactobacillales;f__Lactobacillaceae;g__Leuconostoc;s__	taxonomic classification defined by topology and ANI	topological placement and ANI have congruent species assignments	GCF_014634805.1, s__Leuconostoc falkenbergense, 95.0, 92.7, 0.86; GCF_000014445.1, s__Leuconostoc mesenteroides, 95.0, 81.02, 0.36; GCF_014651235.1, s__Leuconostoc lactis, 95.0, 80.65, 0.27; GCF_001891125.1, s__Leuconostoc suionicum, 95.0, 80.48, 0.33; GCF_009676745.1, s__Leuconostoc mesenteroides_B, 95.0, 80.41, 0.37; GCF_007954625.1, s__Leuconostoc lactis_A, 95.0, 79.95, 0.25; GCF_012396485.1, …	94.84	11	N/A	N/A
C4C_bin.4	d__Bacteria;p__Firmicutes;c__Bacilli;o__Lactobacillales;f__Lactobacillaceae;g__Leuconostoc;s__Leuconostoc pseudomesenteroides	GCF_014634745.1	95	d__Bacteria;p__Firmicutes;c__Bacilli;o__Lactobacillales;f__Lactobacillaceae;g__Leuconostoc;s__Leuconostoc pseudomesenteroides	97.04	0.9	GCF_014634745.1	95	d__Bacteria;p__Firmicutes;c__Bacilli;o__Lactobacillales;f__Lactobacillaceae;g__Leuconostoc;s__Leuconostoc pseudomesenteroides	97.04	0.9	d__Bacteria;p__Firmicutes;c__Bacilli;o__Lactobacillales;f__Lactobacillaceae;g__Leuconostoc;s__	taxonomic classification defined by topology and ANI	topological placement and ANI have congruent species assignments	GCF_014634805.1, s__Leuconostoc falkenbergense, 95.0, 92.94, 0.79; GCF_014651235.1, s__Leuconostoc lactis, 95.0, 79.8, 0.24; GCF_000014445.1, s__Leuconostoc mesenteroides, 95.0, 79.62, 0.34; GCF_001891125.1, s__Leuconostoc suionicum, 95.0, 79.6, 0.31; GCF_009676745.1, s__Leuconostoc mesenteroides_B, 95.0, 79.21, 0.33; GCF_007954625.1, s__Leuconostoc lactis_A, 95.0, 79.17, 0.23; GCF_012396485.1, s…	92.81	11	N/A	N/A
C8A_bin.6	d__Bacteria;p__Firmicutes;c__Bacilli;o__Lactobacillales;f__Lactobacillaceae;g__Leuconostoc;s__Leuconostoc pseudomesenteroides	GCF_014634745.1	95	d__Bacteria;p__Firmicutes;c__Bacilli;o__Lactobacillales;f__Lactobacillaceae;g__Leuconostoc;s__Leuconostoc pseudomesenteroides	96.71	0.83	GCF_014634745.1	95	d__Bacteria;p__Firmicutes;c__Bacilli;o__Lactobacillales;f__Lactobacillaceae;g__Leuconostoc;s__Leuconostoc pseudomesenteroides	96.71	0.83	d__Bacteria;p__Firmicutes;c__Bacilli;o__Lactobacillales;f__Lactobacillaceae;g__Leuconostoc;s__	taxonomic classification defined by topology and ANI	topological placement and ANI have congruent species assignments	GCF_014634805.1, s__Leuconostoc falkenbergense, 95.0, 92.7, 0.85; GCF_000014445.1, s__Leuconostoc mesenteroides, 95.0, 81.08, 0.34; GCF_001891125.1, s__Leuconostoc suionicum, 95.0, 80.68, 0.3; GCF_014651235.1, s__Leuconostoc lactis, 95.0, 80.41, 0.27; GCF_009676745.1, s__Leuconostoc mesenteroides_B, 95.0, 80.28, 0.35; GCF_000092505.1, s__Leuconostoc kimchii, 95.0, 79.96, 0.25; GCF_007954625.1, s_…	95.04	11	N/A	N/A
C8B_bin.4	d__Bacteria;p__Firmicutes;c__Bacilli;o__Lactobacillales;f__Lactobacillaceae;g__Leuconostoc;s__Leuconostoc pseudomesenteroides	GCF_014634745.1	95	d__Bacteria;p__Firmicutes;c__Bacilli;o__Lactobacillales;f__Lactobacillaceae;g__Leuconostoc;s__Leuconostoc pseudomesenteroides	96.72	0.83	GCF_014634745.1	95	d__Bacteria;p__Firmicutes;c__Bacilli;o__Lactobacillales;f__Lactobacillaceae;g__Leuconostoc;s__Leuconostoc pseudomesenteroides	96.72	0.83	d__Bacteria;p__Firmicutes;c__Bacilli;o__Lactobacillales;f__Lactobacillaceae;g__Leuconostoc;s__	taxonomic classification defined by topology and ANI	topological placement and ANI have congruent species assignments	GCF_014634805.1, s__Leuconostoc falkenbergense, 95.0, 92.67, 0.85; GCF_000014445.1, s__Leuconostoc mesenteroides, 95.0, 81.01, 0.35; GCF_014651235.1, s__Leuconostoc lactis, 95.0, 80.71, 0.28; GCF_009676745.1, s__Leuconostoc mesenteroides_B, 95.0, 80.51, 0.37; GCF_001891125.1, s__Leuconostoc suionicum, 95.0, 80.47, 0.33; GCF_000092505.1, s__Leuconostoc kimchii, 95.0, 80.19, 0.27; GCF_007954625.1, …	94.76	11	N/A	N/A
C8C_bin.4	d__Bacteria;p__Firmicutes;c__Bacilli;o__Lactobacillales;f__Lactobacillaceae;g__Leuconostoc;s__Leuconostoc pseudomesenteroides	GCF_014634745.1	95	d__Bacteria;p__Firmicutes;c__Bacilli;o__Lactobacillales;f__Lactobacillaceae;g__Leuconostoc;s__Leuconostoc pseudomesenteroides	96.69	0.83	GCF_014634745.1	95	d__Bacteria;p__Firmicutes;c__Bacilli;o__Lactobacillales;f__Lactobacillaceae;g__Leuconostoc;s__Leuconostoc pseudomesenteroides	96.69	0.83	d__Bacteria;p__Firmicutes;c__Bacilli;o__Lactobacillales;f__Lactobacillaceae;g__Leuconostoc;s__	taxonomic classification defined by topology and ANI	topological placement and ANI have congruent species assignments	GCF_014634805.1, s__Leuconostoc falkenbergense, 95.0, 92.66, 0.84; GCF_000014445.1, s__Leuconostoc mesenteroides, 95.0, 80.8, 0.34; GCF_014651235.1, s__Leuconostoc lactis, 95.0, 80.38, 0.26; GCF_009676745.1, s__Leuconostoc mesenteroides_B, 95.0, 80.35, 0.36; GCF_001891125.1, s__Leuconostoc suionicum, 95.0, 80.3, 0.32; GCF_000092505.1, s__Leuconostoc kimchii, 95.0, 79.85, 0.25; GCF_007954625.1, s_…	82.64	11	N/A	N/A
C2C_bin.7	d__Bacteria;p__Firmicutes;c__Bacilli;o__Lactobacillales;f__Lactobacillaceae;g__Leuconostoc;s__Leuconostoc suionicum	GCF_001891125.1	95	d__Bacteria;p__Firmicutes;c__Bacilli;o__Lactobacillales;f__Lactobacillaceae;g__Leuconostoc;s__Leuconostoc suionicum	96.53	0.63	GCF_001891125.1	95	d__Bacteria;p__Firmicutes;c__Bacilli;o__Lactobacillales;f__Lactobacillaceae;g__Leuconostoc;s__Leuconostoc suionicum	96.53	0.63	d__Bacteria;p__Firmicutes;c__Bacilli;o__Lactobacillales;f__Lactobacillaceae;g__Leuconostoc;s__	taxonomic classification defined by topology and ANI	topological placement and ANI have congruent species assignments	GCF_000014445.1, s__Leuconostoc mesenteroides, 95.0, 93.33, 0.61; GCF_009676745.1, s__Leuconostoc mesenteroides_B, 95.0, 88.62, 0.54; GCF_014634745.1, s__Leuconostoc pseudomesenteroides, 95.0, 83.49, 0.29; GCF_008107645.1, s__Leuconostoc litchii, 95.0, 81.58, 0.4; GCF_014634805.1, s__Leuconostoc falkenbergense, 95.0, 80.79, 0.28; GCF_004354555.1, s__Leuconostoc citreum, 95.0, 79.7, 0.17; GCF_0079…	58.22	11	N/A	N/A
C15B_bin.6	d__Bacteria;p__Firmicutes;c__Bacilli;o__Lactobacillales;f__Lactobacillaceae;g__Levilactobacillus;s__Levilactobacillus brevis	GCF_001433855.1	95	d__Bacteria;p__Firmicutes;c__Bacilli;o__Lactobacillales;f__Lactobacillaceae;g__Levilactobacillus;s__Levilactobacillus brevis	98.88	0.94	GCF_001433855.1	95	d__Bacteria;p__Firmicutes;c__Bacilli;o__Lactobacillales;f__Lactobacillaceae;g__Levilactobacillus;s__Levilactobacillus brevis	98.88	0.94	d__Bacteria;p__Firmicutes;c__Bacilli;o__Lactobacillales;f__Lactobacillaceae;g__Levilactobacillus;s__	taxonomic classification defined by topology and ANI	topological placement and ANI have congruent species assignments	GCF_003946335.1, s__Levilactobacillus fujinensis, 95.0, 80.55, 0.4; GCF_001435525.1, s__Levilactobacillus koreensis, 95.0, 80.46, 0.38; GCF_016861655.1, s__Levilactobacillus sp016861655, 95.0, 80.39, 0.42; GCF_016861695.1, s__Levilactobacillus sp016861695, 95.0, 80.34, 0.39; GCF_016861585.1, s__Levilactobacillus sp016861585, 95.0, 80.3, 0.41; GCF_007115095.1, s__Levilactobacillus enshiensis, 95.0…	64.42	11	N/A	N/A
C15C_bin.5	d__Bacteria;p__Firmicutes;c__Bacilli;o__Lactobacillales;f__Lactobacillaceae;g__Levilactobacillus;s__Levilactobacillus brevis	GCF_001433855.1	95	d__Bacteria;p__Firmicutes;c__Bacilli;o__Lactobacillales;f__Lactobacillaceae;g__Levilactobacillus;s__Levilactobacillus brevis	97.7	0.95	GCF_001433855.1	95	d__Bacteria;p__Firmicutes;c__Bacilli;o__Lactobacillales;f__Lactobacillaceae;g__Levilactobacillus;s__Levilactobacillus brevis	97.7	0.95	d__Bacteria;p__Firmicutes;c__Bacilli;o__Lactobacillales;f__Lactobacillaceae;g__Levilactobacillus;s__	taxonomic classification defined by topology and ANI	topological placement and ANI have congruent species assignments	GCF_004745505.1, s__Levilactobacillus suantsaiihabitans, 95.0, 80.11, 0.43; GCF_016861585.1, s__Levilactobacillus sp016861585, 95.0, 80.09, 0.46; GCF_003946345.1, s__Levilactobacillus tongjiangensis, 95.0, 80.07, 0.45; GCF_016861655.1, s__Levilactobacillus sp016861655, 95.0, 80.05, 0.45; GCF_003946045.1, s__Levilactobacillus mulengensis, 95.0, 79.91, 0.48; GCF_003946335.1, s__Levilactobacillus fu…	60.94	11	N/A	N/A
C40A_bin.6	d__Bacteria;p__Firmicutes;c__Bacilli;o__Lactobacillales;f__Lactobacillaceae;g__Levilactobacillus;s__Levilactobacillus brevis	GCF_001433855.1	95	d__Bacteria;p__Firmicutes;c__Bacilli;o__Lactobacillales;f__Lactobacillaceae;g__Levilactobacillus;s__Levilactobacillus brevis	99.08	0.92	GCF_001433855.1	95	d__Bacteria;p__Firmicutes;c__Bacilli;o__Lactobacillales;f__Lactobacillaceae;g__Levilactobacillus;s__Levilactobacillus brevis	99.08	0.92	d__Bacteria;p__Firmicutes;c__Bacilli;o__Lactobacillales;f__Lactobacillaceae;g__Levilactobacillus;s__	taxonomic classification defined by topology and ANI	topological placement and ANI have congruent species assignments	GCF_003946045.1, s__Levilactobacillus mulengensis, 95.0, 81.05, 0.4; GCF_016861585.1, s__Levilactobacillus sp016861585, 95.0, 80.73, 0.43; GCF_003946085.1, s__Levilactobacillus angrenensis, 95.0, 80.63, 0.43; GCF_003946335.1, s__Levilactobacillus fujinensis, 95.0, 80.57, 0.37; GCF_016861655.1, s__Levilactobacillus sp016861655, 95.0, 80.56, 0.43; GCF_004745505.1, s__Levilactobacillus suantsaiihabi…	79.37	11	N/A	N/A
C40B_bin.1	d__Bacteria;p__Firmicutes;c__Bacilli;o__Lactobacillales;f__Lactobacillaceae;g__Levilactobacillus;s__Levilactobacillus brevis	GCF_001433855.1	95	d__Bacteria;p__Firmicutes;c__Bacilli;o__Lactobacillales;f__Lactobacillaceae;g__Levilactobacillus;s__Levilactobacillus brevis	98.15	0.91	GCF_001433855.1	95	d__Bacteria;p__Firmicutes;c__Bacilli;o__Lactobacillales;f__Lactobacillaceae;g__Levilactobacillus;s__Levilactobacillus brevis	98.15	0.91	d__Bacteria;p__Firmicutes;c__Bacilli;o__Lactobacillales;f__Lactobacillaceae;g__Levilactobacillus;s__	taxonomic classification defined by topology and ANI	topological placement and ANI have congruent species assignments	GCF_004745505.1, s__Levilactobacillus suantsaiihabitans, 95.0, 80.07, 0.4; GCF_003946335.1, s__Levilactobacillus fujinensis, 95.0, 80.02, 0.37; GCF_016861695.1, s__Levilactobacillus sp016861695, 95.0, 79.91, 0.42; GCF_003946085.1, s__Levilactobacillus angrenensis, 95.0, 79.9, 0.42; GCF_016861585.1, s__Levilactobacillus sp016861585, 95.0, 79.86, 0.43; GCF_003946045.1, s__Levilactobacillus mulengen…	61.91	11	N/A	N/A
C40C_bin.7	d__Bacteria;p__Firmicutes;c__Bacilli;o__Lactobacillales;f__Lactobacillaceae;g__Levilactobacillus;s__Levilactobacillus brevis	GCF_001433855.1	95	d__Bacteria;p__Firmicutes;c__Bacilli;o__Lactobacillales;f__Lactobacillaceae;g__Levilactobacillus;s__Levilactobacillus brevis	98.83	0.86	GCF_001433855.1	95	d__Bacteria;p__Firmicutes;c__Bacilli;o__Lactobacillales;f__Lactobacillaceae;g__Levilactobacillus;s__Levilactobacillus brevis	98.83	0.86	d__Bacteria;p__Firmicutes;c__Bacilli;o__Lactobacillales;f__Lactobacillaceae;g__Levilactobacillus;s__	taxonomic classification defined by topology and ANI	topological placement and ANI have congruent species assignments	GCF_004745505.1, s__Levilactobacillus suantsaiihabitans, 95.0, 80.74, 0.37; GCF_016861695.1, s__Levilactobacillus sp016861695, 95.0, 80.67, 0.36; GCF_003946335.1, s__Levilactobacillus fujinensis, 95.0, 80.67, 0.32; GCF_003946045.1, s__Levilactobacillus mulengensis, 95.0, 80.52, 0.38; GCF_016861655.1, s__Levilactobacillus sp016861655, 95.0, 80.52, 0.38; GCF_016861585.1, s__Levilactobacillus sp0168…	71.47	11	N/A	N/A
C4C_bin.3	d__Bacteria;p__Firmicutes;c__Bacilli;o__Lactobacillales;f__Lactobacillaceae;g__Levilactobacillus;s__Levilactobacillus brevis	GCF_001433855.1	95	d__Bacteria;p__Firmicutes;c__Bacilli;o__Lactobacillales;f__Lactobacillaceae;g__Levilactobacillus;s__Levilactobacillus brevis	98.23	0.97	GCF_001433855.1	95	d__Bacteria;p__Firmicutes;c__Bacilli;o__Lactobacillales;f__Lactobacillaceae;g__Levilactobacillus;s__Levilactobacillus brevis	98.23	0.97	d__Bacteria;p__Firmicutes;c__Bacilli;o__Lactobacillales;f__Lactobacillaceae;g__Levilactobacillus;s__	taxonomic classification defined by topology and ANI	topological placement and ANI have congruent species assignments	GCF_004745505.1, s__Levilactobacillus suantsaiihabitans, 95.0, 80.55, 0.43; GCF_003946085.1, s__Levilactobacillus angrenensis, 95.0, 80.45, 0.46; GCF_001435525.1, s__Levilactobacillus koreensis, 95.0, 80.41, 0.44; GCF_016861585.1, s__Levilactobacillus sp016861585, 95.0, 80.39, 0.45; GCF_003946045.1, s__Levilactobacillus mulengensis, 95.0, 80.39, 0.47; GCF_003666485.1, s__Levilactobacillus brevis_…	76.37	11	N/A	N/A
C8C_bin.7	d__Bacteria;p__Firmicutes;c__Bacilli;o__Lactobacillales;f__Lactobacillaceae;g__Levilactobacillus;s__Levilactobacillus brevis	GCF_001433855.1	95	d__Bacteria;p__Firmicutes;c__Bacilli;o__Lactobacillales;f__Lactobacillaceae;g__Levilactobacillus;s__Levilactobacillus brevis	98.49	0.9	GCF_001433855.1	95	d__Bacteria;p__Firmicutes;c__Bacilli;o__Lactobacillales;f__Lactobacillaceae;g__Levilactobacillus;s__Levilactobacillus brevis	98.49	0.9	d__Bacteria;p__Firmicutes;c__Bacilli;o__Lactobacillales;f__Lactobacillaceae;g__Levilactobacillus;s__	taxonomic classification defined by topology and ANI	topological placement and ANI have congruent species assignments	GCF_004745505.1, s__Levilactobacillus suantsaiihabitans, 95.0, 80.77, 0.48; GCF_016861695.1, s__Levilactobacillus sp016861695, 95.0, 80.74, 0.49; GCF_007115095.1, s__Levilactobacillus enshiensis, 95.0, 80.65, 0.5; GCF_012641185.1, s__Levilactobacillus sp012641185, 95.0, 80.64, 0.45; GCF_003946395.1, s__Levilactobacillus fuyuanensis, 95.0, 80.62, 0.43; GCF_001435525.1, s__Levilactobacillus koreens…	68.69	11	N/A	N/A
C15A_bin.7	d__Bacteria;p__Firmicutes;c__Bacilli;o__Lactobacillales;f__Lactobacillaceae;g__Weissella;s__Weissella cibaria	GCF_000193635.1	95	d__Bacteria;p__Firmicutes;c__Bacilli;o__Lactobacillales;f__Lactobacillaceae;g__Weissella;s__Weissella cibaria	98.89	0.94	GCF_000193635.1	95	d__Bacteria;p__Firmicutes;c__Bacilli;o__Lactobacillales;f__Lactobacillaceae;g__Weissella;s__Weissella cibaria	98.89	0.94	d__Bacteria;p__Firmicutes;c__Bacilli;o__Lactobacillales;f__Lactobacillaceae;g__Weissella;s__	taxonomic classification defined by topology and ANI	topological placement and ANI have congruent species assignments	GCF_004521965.1, s__Weissella cibaria_A, 95.0, 94.02, 0.86; GCF_004766315.1, s__Weissella confusa_A, 95.0, 83.29, 0.61; GCF_004771295.1, s__Weissella confusa_B, 95.0, 83.29, 0.6; GCA_001436895.1, s__Weissella confusa, 95.0, 83.17, 0.61; GCF_008107635.1, s__Weissella muntiaci, 95.0, 79.76, 0.15; GCF_018394055.1, s__Weissella ceti, 95.0, 79.57, 0.19; GCF_005405465.1, s__Weissella thailandensis, 95.…	92.06	11	N/A	N/A
C15B_bin.2	d__Bacteria;p__Firmicutes;c__Bacilli;o__Lactobacillales;f__Lactobacillaceae;g__Weissella;s__Weissella cibaria	GCF_000193635.1	95	d__Bacteria;p__Firmicutes;c__Bacilli;o__Lactobacillales;f__Lactobacillaceae;g__Weissella;s__Weissella cibaria	98.88	0.97	GCF_000193635.1	95	d__Bacteria;p__Firmicutes;c__Bacilli;o__Lactobacillales;f__Lactobacillaceae;g__Weissella;s__Weissella cibaria	98.88	0.97	d__Bacteria;p__Firmicutes;c__Bacilli;o__Lactobacillales;f__Lactobacillaceae;g__Weissella;s__	taxonomic classification defined by topology and ANI	topological placement and ANI have congruent species assignments	GCF_004521965.1, s__Weissella cibaria_A, 95.0, 93.99, 0.88; GCA_001436895.1, s__Weissella confusa, 95.0, 83.11, 0.62; GCF_004766315.1, s__Weissella confusa_A, 95.0, 83.06, 0.63; GCF_004771295.1, s__Weissella confusa_B, 95.0, 82.9, 0.61; GCF_018394055.1, s__Weissella ceti, 95.0, 79.73, 0.19; GCF_001437355.1, s__Weissella viridescens, 95.0, 79.49, 0.17; GCF_000750535.1, s__Weissella ceti_A, 95.0, 7…	90.29	11	N/A	N/A
C15C_bin.3	d__Bacteria;p__Firmicutes;c__Bacilli;o__Lactobacillales;f__Lactobacillaceae;g__Weissella;s__Weissella cibaria	GCF_000193635.1	95	d__Bacteria;p__Firmicutes;c__Bacilli;o__Lactobacillales;f__Lactobacillaceae;g__Weissella;s__Weissella cibaria	98.82	0.97	GCF_000193635.1	95	d__Bacteria;p__Firmicutes;c__Bacilli;o__Lactobacillales;f__Lactobacillaceae;g__Weissella;s__Weissella cibaria	98.82	0.97	d__Bacteria;p__Firmicutes;c__Bacilli;o__Lactobacillales;f__Lactobacillaceae;g__Weissella;s__	taxonomic classification defined by topology and ANI	topological placement and ANI have congruent species assignments	GCF_004521965.1, s__Weissella cibaria_A, 95.0, 93.88, 0.89; GCF_004771295.1, s__Weissella confusa_B, 95.0, 83.28, 0.64; GCF_004766315.1, s__Weissella confusa_A, 95.0, 83.1, 0.65; GCA_001436895.1, s__Weissella confusa, 95.0, 83.07, 0.64; GCF_008107635.1, s__Weissella muntiaci, 95.0, 80.07, 0.15; GCF_001437355.1, s__Weissella viridescens, 95.0, 79.81, 0.17; GCF_000750535.1, s__Weissella ceti_A, 95.…	92.81	11	N/A	N/A
C2A_bin.6	d__Bacteria;p__Firmicutes;c__Bacilli;o__Lactobacillales;f__Lactobacillaceae;g__Weissella;s__Weissella cibaria	GCF_000193635.1	95	d__Bacteria;p__Firmicutes;c__Bacilli;o__Lactobacillales;f__Lactobacillaceae;g__Weissella;s__Weissella cibaria	98.8	0.95	GCF_000193635.1	95	d__Bacteria;p__Firmicutes;c__Bacilli;o__Lactobacillales;f__Lactobacillaceae;g__Weissella;s__Weissella cibaria	98.8	0.95	d__Bacteria;p__Firmicutes;c__Bacilli;o__Lactobacillales;f__Lactobacillaceae;g__Weissella;s__	taxonomic classification defined by topology and ANI	topological placement and ANI have congruent species assignments	GCF_004521965.1, s__Weissella cibaria_A, 95.0, 93.88, 0.85; GCF_004771295.1, s__Weissella confusa_B, 95.0, 82.92, 0.59; GCA_001436895.1, s__Weissella confusa, 95.0, 82.75, 0.63; GCF_004766315.1, s__Weissella confusa_A, 95.0, 82.66, 0.61; GCF_018394055.1, s__Weissella ceti, 95.0, 79.61, 0.17; GCF_008107635.1, s__Weissella muntiaci, 95.0, 79.56, 0.12; GCF_000691805.2, s__Weissella oryzae, 95.0, 79.…	92.65	11	N/A	N/A
C2B_bin.1	d__Bacteria;p__Firmicutes;c__Bacilli;o__Lactobacillales;f__Lactobacillaceae;g__Weissella;s__Weissella cibaria	GCF_000193635.1	95	d__Bacteria;p__Firmicutes;c__Bacilli;o__Lactobacillales;f__Lactobacillaceae;g__Weissella;s__Weissella cibaria	98.87	0.97	GCF_000193635.1	95	d__Bacteria;p__Firmicutes;c__Bacilli;o__Lactobacillales;f__Lactobacillaceae;g__Weissella;s__Weissella cibaria	98.87	0.97	d__Bacteria;p__Firmicutes;c__Bacilli;o__Lactobacillales;f__Lactobacillaceae;g__Weissella;s__	taxonomic classification defined by topology and ANI	topological placement and ANI have congruent species assignments	GCF_004521965.1, s__Weissella cibaria_A, 95.0, 94.02, 0.87; GCF_004766315.1, s__Weissella confusa_A, 95.0, 83.18, 0.59; GCF_004771295.1, s__Weissella confusa_B, 95.0, 83.06, 0.62; GCA_001436895.1, s__Weissella confusa, 95.0, 82.89, 0.62; GCF_005405465.1, s__Weissella thailandensis, 95.0, 79.48, 0.18; GCF_008107635.1, s__Weissella muntiaci, 95.0, 79.4, 0.15; GCF_001437355.1, s__Weissella viridesce…	91.96	11	N/A	N/A
C2C_bin.3	d__Bacteria;p__Firmicutes;c__Bacilli;o__Lactobacillales;f__Lactobacillaceae;g__Weissella;s__Weissella cibaria	GCF_000193635.1	95	d__Bacteria;p__Firmicutes;c__Bacilli;o__Lactobacillales;f__Lactobacillaceae;g__Weissella;s__Weissella cibaria	98.82	0.96	GCF_000193635.1	95	d__Bacteria;p__Firmicutes;c__Bacilli;o__Lactobacillales;f__Lactobacillaceae;g__Weissella;s__Weissella cibaria	98.82	0.96	d__Bacteria;p__Firmicutes;c__Bacilli;o__Lactobacillales;f__Lactobacillaceae;g__Weissella;s__	taxonomic classification defined by topology and ANI	topological placement and ANI have congruent species assignments	GCF_004521965.1, s__Weissella cibaria_A, 95.0, 93.9, 0.87; GCF_004771295.1, s__Weissella confusa_B, 95.0, 83.21, 0.62; GCA_001436895.1, s__Weissella confusa, 95.0, 83.1, 0.61; GCF_004766315.1, s__Weissella confusa_A, 95.0, 83.03, 0.59; GCF_018394055.1, s__Weissella ceti, 95.0, 79.66, 0.18; GCF_001437355.1, s__Weissella viridescens, 95.0, 79.19, 0.15; GCF_005405465.1, s__Weissella thailandensis, 9…	89.22	11	N/A	N/A
C40A_bin.3	d__Bacteria;p__Firmicutes;c__Bacilli;o__Lactobacillales;f__Lactobacillaceae;g__Weissella;s__Weissella cibaria	GCF_000193635.1	95	d__Bacteria;p__Firmicutes;c__Bacilli;o__Lactobacillales;f__Lactobacillaceae;g__Weissella;s__Weissella cibaria	98.81	0.97	GCF_000193635.1	95	d__Bacteria;p__Firmicutes;c__Bacilli;o__Lactobacillales;f__Lactobacillaceae;g__Weissella;s__Weissella cibaria	98.81	0.97	d__Bacteria;p__Firmicutes;c__Bacilli;o__Lactobacillales;f__Lactobacillaceae;g__Weissella;s__	taxonomic classification defined by topology and ANI	topological placement and ANI have congruent species assignments	GCF_004521965.1, s__Weissella cibaria_A, 95.0, 94.03, 0.87; GCF_004771295.1, s__Weissella confusa_B, 95.0, 83.34, 0.64; GCF_004766315.1, s__Weissella confusa_A, 95.0, 83.32, 0.63; GCA_001436895.1, s__Weissella confusa, 95.0, 83.24, 0.65; GCF_001437355.1, s__Weissella viridescens, 95.0, 79.6, 0.15; GCF_008107635.1, s__Weissella muntiaci, 95.0, 79.55, 0.16; GCF_018394055.1, s__Weissella ceti, 95.0,…	85.66	11	N/A	N/A
C40B_bin.8	d__Bacteria;p__Firmicutes;c__Bacilli;o__Lactobacillales;f__Lactobacillaceae;g__Weissella;s__Weissella cibaria	GCF_000193635.1	95	d__Bacteria;p__Firmicutes;c__Bacilli;o__Lactobacillales;f__Lactobacillaceae;g__Weissella;s__Weissella cibaria	98.69	0.89	GCF_000193635.1	95	d__Bacteria;p__Firmicutes;c__Bacilli;o__Lactobacillales;f__Lactobacillaceae;g__Weissella;s__Weissella cibaria	98.69	0.89	d__Bacteria;p__Firmicutes;c__Bacilli;o__Lactobacillales;f__Lactobacillaceae;g__Weissella;s__	taxonomic classification defined by topology and ANI	topological placement and ANI have congruent species assignments	GCF_004521965.1, s__Weissella cibaria_A, 95.0, 93.86, 0.8; GCF_004771295.1, s__Weissella confusa_B, 95.0, 83.29, 0.58; GCF_004766315.1, s__Weissella confusa_A, 95.0, 83.28, 0.56; GCA_001436895.1, s__Weissella confusa, 95.0, 82.94, 0.57; GCF_005405465.1, s__Weissella thailandensis, 95.0, 79.78, 0.16; GCF_000750535.1, s__Weissella ceti_A, 95.0, 79.62, 0.19; GCF_008107635.1, s__Weissella muntiaci, 9…	93.92	11	N/A	N/A
C40C_bin.1	d__Bacteria;p__Firmicutes;c__Bacilli;o__Lactobacillales;f__Lactobacillaceae;g__Weissella;s__Weissella cibaria	GCF_000193635.1	95	d__Bacteria;p__Firmicutes;c__Bacilli;o__Lactobacillales;f__Lactobacillaceae;g__Weissella;s__Weissella cibaria	98.82	0.97	GCF_000193635.1	95	d__Bacteria;p__Firmicutes;c__Bacilli;o__Lactobacillales;f__Lactobacillaceae;g__Weissella;s__Weissella cibaria	98.82	0.97	d__Bacteria;p__Firmicutes;c__Bacilli;o__Lactobacillales;f__Lactobacillaceae;g__Weissella;s__	taxonomic classification defined by topology and ANI	topological placement and ANI have congruent species assignments	GCF_004521965.1, s__Weissella cibaria_A, 95.0, 93.78, 0.88; GCF_004771295.1, s__Weissella confusa_B, 95.0, 83.35, 0.64; GCA_001436895.1, s__Weissella confusa, 95.0, 83.09, 0.64; GCF_004766315.1, s__Weissella confusa_A, 95.0, 83.0, 0.63; GCF_018394055.1, s__Weissella ceti, 95.0, 79.81, 0.18; GCF_006777025.1, s__Weissella hellenica_B, 95.0, 79.27, 0.2; GCF_003862435.1, s__Weissella viridescens_A, 9…	83.96	11	N/A	N/A
C4A_bin.5	d__Bacteria;p__Firmicutes;c__Bacilli;o__Lactobacillales;f__Lactobacillaceae;g__Weissella;s__Weissella cibaria	GCF_000193635.1	95	d__Bacteria;p__Firmicutes;c__Bacilli;o__Lactobacillales;f__Lactobacillaceae;g__Weissella;s__Weissella cibaria	98.8	0.96	GCF_000193635.1	95	d__Bacteria;p__Firmicutes;c__Bacilli;o__Lactobacillales;f__Lactobacillaceae;g__Weissella;s__Weissella cibaria	98.8	0.96	d__Bacteria;p__Firmicutes;c__Bacilli;o__Lactobacillales;f__Lactobacillaceae;g__Weissella;s__	taxonomic classification defined by topology and ANI	topological placement and ANI have congruent species assignments	GCF_004521965.1, s__Weissella cibaria_A, 95.0, 93.83, 0.85; GCF_004766315.1, s__Weissella confusa_A, 95.0, 83.24, 0.58; GCF_004771295.1, s__Weissella confusa_B, 95.0, 83.07, 0.61; GCA_001436895.1, s__Weissella confusa, 95.0, 83.01, 0.61; GCF_018394055.1, s__Weissella ceti, 95.0, 79.69, 0.19; GCF_008107635.1, s__Weissella muntiaci, 95.0, 79.53, 0.14; GCF_001437355.1, s__Weissella viridescens, 95.0…	88.78	11	N/A	N/A
C4B_bin.5	d__Bacteria;p__Firmicutes;c__Bacilli;o__Lactobacillales;f__Lactobacillaceae;g__Weissella;s__Weissella cibaria	GCF_000193635.1	95	d__Bacteria;p__Firmicutes;c__Bacilli;o__Lactobacillales;f__Lactobacillaceae;g__Weissella;s__Weissella cibaria	98.76	0.97	GCF_000193635.1	95	d__Bacteria;p__Firmicutes;c__Bacilli;o__Lactobacillales;f__Lactobacillaceae;g__Weissella;s__Weissella cibaria	98.76	0.97	d__Bacteria;p__Firmicutes;c__Bacilli;o__Lactobacillales;f__Lactobacillaceae;g__Weissella;s__	taxonomic classification defined by topology and ANI	topological placement and ANI have congruent species assignments	GCF_004521965.1, s__Weissella cibaria_A, 95.0, 93.95, 0.9; GCA_001436895.1, s__Weissella confusa, 95.0, 83.24, 0.64; GCF_004771295.1, s__Weissella confusa_B, 95.0, 83.19, 0.64; GCF_004766315.1, s__Weissella confusa_A, 95.0, 83.15, 0.64; GCF_018394055.1, s__Weissella ceti, 95.0, 79.83, 0.2; GCF_008107635.1, s__Weissella muntiaci, 95.0, 79.41, 0.16; GCF_000750535.1, s__Weissella ceti_A, 95.0, 79.41…	88.34	11	N/A	N/A
C4C_bin.5	d__Bacteria;p__Firmicutes;c__Bacilli;o__Lactobacillales;f__Lactobacillaceae;g__Weissella;s__Weissella cibaria	GCF_000193635.1	95	d__Bacteria;p__Firmicutes;c__Bacilli;o__Lactobacillales;f__Lactobacillaceae;g__Weissella;s__Weissella cibaria	98.77	0.97	GCF_000193635.1	95	d__Bacteria;p__Firmicutes;c__Bacilli;o__Lactobacillales;f__Lactobacillaceae;g__Weissella;s__Weissella cibaria	98.77	0.97	d__Bacteria;p__Firmicutes;c__Bacilli;o__Lactobacillales;f__Lactobacillaceae;g__Weissella;s__	taxonomic classification defined by topology and ANI	topological placement and ANI have congruent species assignments	GCF_004521965.1, s__Weissella cibaria_A, 95.0, 93.82, 0.85; GCF_004771295.1, s__Weissella confusa_B, 95.0, 82.9, 0.62; GCF_004766315.1, s__Weissella confusa_A, 95.0, 82.83, 0.59; GCA_001436895.1, s__Weissella confusa, 95.0, 82.71, 0.6; GCF_018394055.1, s__Weissella ceti, 95.0, 79.88, 0.17; GCF_001437355.1, s__Weissella viridescens, 95.0, 79.41, 0.15; GCF_000750535.1, s__Weissella ceti_A, 95.0, 79…	90.51	11	N/A	N/A
C8A_bin.3	d__Bacteria;p__Firmicutes;c__Bacilli;o__Lactobacillales;f__Lactobacillaceae;g__Weissella;s__Weissella cibaria	GCF_000193635.1	95	d__Bacteria;p__Firmicutes;c__Bacilli;o__Lactobacillales;f__Lactobacillaceae;g__Weissella;s__Weissella cibaria	98.73	0.96	GCF_000193635.1	95	d__Bacteria;p__Firmicutes;c__Bacilli;o__Lactobacillales;f__Lactobacillaceae;g__Weissella;s__Weissella cibaria	98.73	0.96	d__Bacteria;p__Firmicutes;c__Bacilli;o__Lactobacillales;f__Lactobacillaceae;g__Weissella;s__	taxonomic classification defined by topology and ANI	topological placement and ANI have congruent species assignments	GCF_004521965.1, s__Weissella cibaria_A, 95.0, 93.87, 0.85; GCF_004766315.1, s__Weissella confusa_A, 95.0, 83.19, 0.6; GCF_004771295.1, s__Weissella confusa_B, 95.0, 83.13, 0.63; GCA_001436895.1, s__Weissella confusa, 95.0, 83.07, 0.61; GCF_018394055.1, s__Weissella ceti, 95.0, 79.68, 0.2; GCF_000750535.1, s__Weissella ceti_A, 95.0, 79.48, 0.19; GCF_001437355.1, s__Weissella viridescens, 95.0, 79…	90.85	11	N/A	N/A
C8B_bin.1	d__Bacteria;p__Firmicutes;c__Bacilli;o__Lactobacillales;f__Lactobacillaceae;g__Weissella;s__Weissella cibaria	GCF_000193635.1	95	d__Bacteria;p__Firmicutes;c__Bacilli;o__Lactobacillales;f__Lactobacillaceae;g__Weissella;s__Weissella cibaria	98.98	0.96	GCF_000193635.1	95	d__Bacteria;p__Firmicutes;c__Bacilli;o__Lactobacillales;f__Lactobacillaceae;g__Weissella;s__Weissella cibaria	98.98	0.96	d__Bacteria;p__Firmicutes;c__Bacilli;o__Lactobacillales;f__Lactobacillaceae;g__Weissella;s__	taxonomic classification defined by topology and ANI	topological placement and ANI have congruent species assignments	GCF_004521965.1, s__Weissella cibaria_A, 95.0, 93.87, 0.9; GCF_004766315.1, s__Weissella confusa_A, 95.0, 82.92, 0.61; GCF_004771295.1, s__Weissella confusa_B, 95.0, 82.75, 0.63; GCA_001436895.1, s__Weissella confusa, 95.0, 82.68, 0.65; GCF_000750535.1, s__Weissella ceti_A, 95.0, 79.52, 0.18; GCF_008107635.1, s__Weissella muntiaci, 95.0, 79.23, 0.14; GCF_018394055.1, s__Weissella ceti, 95.0, 79.2…	89.81	11	N/A	N/A
C8C_bin.1	d__Bacteria;p__Firmicutes;c__Bacilli;o__Lactobacillales;f__Lactobacillaceae;g__Weissella;s__Weissella cibaria	GCF_000193635.1	95	d__Bacteria;p__Firmicutes;c__Bacilli;o__Lactobacillales;f__Lactobacillaceae;g__Weissella;s__Weissella cibaria	98.76	0.97	GCF_000193635.1	95	d__Bacteria;p__Firmicutes;c__Bacilli;o__Lactobacillales;f__Lactobacillaceae;g__Weissella;s__Weissella cibaria	98.76	0.97	d__Bacteria;p__Firmicutes;c__Bacilli;o__Lactobacillales;f__Lactobacillaceae;g__Weissella;s__	taxonomic classification defined by topology and ANI	topological placement and ANI have congruent species assignments	GCF_004521965.1, s__Weissella cibaria_A, 95.0, 93.83, 0.88; GCF_004766315.1, s__Weissella confusa_A, 95.0, 83.02, 0.61; GCA_001436895.1, s__Weissella confusa, 95.0, 82.95, 0.6; GCF_004771295.1, s__Weissella confusa_B, 95.0, 82.83, 0.64; GCF_006777025.1, s__Weissella hellenica_B, 95.0, 79.56, 0.19; GCF_000750535.1, s__Weissella ceti_A, 95.0, 79.44, 0.2; GCF_008107635.1, s__Weissella muntiaci, 95.0…	92.69	11	N/A	N/A
C2A_bin.4	d__Bacteria;p__Firmicutes;c__Bacilli;o__Lactobacillales;f__Lactobacillaceae;g__Weissella;s__Weissella confusa	GCA_001436895.1	95	d__Bacteria;p__Firmicutes;c__Bacilli;o__Lactobacillales;f__Lactobacillaceae;g__Weissella;s__Weissella confusa	97.61	0.86	GCA_001436895.1	95	d__Bacteria;p__Firmicutes;c__Bacilli;o__Lactobacillales;f__Lactobacillaceae;g__Weissella;s__Weissella confusa	97.61	0.86	d__Bacteria;p__Firmicutes;c__Bacilli;o__Lactobacillales;f__Lactobacillaceae;g__Weissella;s__	taxonomic classification defined by topology and ANI	topological placement and ANI have congruent species assignments	GCF_004766315.1, s__Weissella confusa_A, 95.0, 91.97, 0.8; GCF_004771295.1, s__Weissella confusa_B, 95.0, 91.55, 0.77; GCF_000193635.1, s__Weissella cibaria, 95.0, 82.36, 0.52; GCF_004521965.1, s__Weissella cibaria_A, 95.0, 81.96, 0.52; GCF_005405545.1, s__Weissella hellenica, 95.0, 78.99, 0.17; GCF_018394055.1, s__Weissella ceti, 95.0, 78.76, 0.22; GCF_000750535.1, s__Weissella ceti_A, 95.0, 78.…	75.87	11	N/A	N/A
C2B_bin.4	d__Bacteria;p__Firmicutes;c__Bacilli;o__Lactobacillales;f__Lactobacillaceae;g__Weissella;s__Weissella confusa	GCA_001436895.1	95	d__Bacteria;p__Firmicutes;c__Bacilli;o__Lactobacillales;f__Lactobacillaceae;g__Weissella;s__Weissella confusa	97.67	0.82	GCA_001436895.1	95	d__Bacteria;p__Firmicutes;c__Bacilli;o__Lactobacillales;f__Lactobacillaceae;g__Weissella;s__Weissella confusa	97.67	0.82	d__Bacteria;p__Firmicutes;c__Bacilli;o__Lactobacillales;f__Lactobacillaceae;g__Weissella;s__	taxonomic classification defined by topology and ANI	topological placement and ANI have congruent species assignments	GCF_004766315.1, s__Weissella confusa_A, 95.0, 91.92, 0.77; GCF_004771295.1, s__Weissella confusa_B, 95.0, 91.59, 0.74; GCF_000193635.1, s__Weissella cibaria, 95.0, 82.26, 0.51; GCF_004521965.1, s__Weissella cibaria_A, 95.0, 81.95, 0.52; GCF_005405545.1, s__Weissella hellenica, 95.0, 78.82, 0.17; GCF_018394055.1, s__Weissella ceti, 95.0, 78.51, 0.22; GCF_005405465.1, s__Weissella thailandensis, 9…	68.55	11	N/A	N/A
C2C_bin.1	d__Bacteria;p__Firmicutes;c__Bacilli;o__Lactobacillales;f__Lactobacillaceae;g__Weissella;s__Weissella confusa	GCA_001436895.1	95	d__Bacteria;p__Firmicutes;c__Bacilli;o__Lactobacillales;f__Lactobacillaceae;g__Weissella;s__Weissella confusa	97.63	0.89	GCA_001436895.1	95	d__Bacteria;p__Firmicutes;c__Bacilli;o__Lactobacillales;f__Lactobacillaceae;g__Weissella;s__Weissella confusa	97.63	0.89	d__Bacteria;p__Firmicutes;c__Bacilli;o__Lactobacillales;f__Lactobacillaceae;g__Weissella;s__	taxonomic classification defined by topology and ANI	topological placement and ANI have congruent species assignments	GCF_004766315.1, s__Weissella confusa_A, 95.0, 91.86, 0.78; GCF_004771295.1, s__Weissella confusa_B, 95.0, 91.67, 0.82; GCF_000193635.1, s__Weissella cibaria, 95.0, 82.15, 0.53; GCF_004521965.1, s__Weissella cibaria_A, 95.0, 81.82, 0.47; GCF_018394055.1, s__Weissella ceti, 95.0, 78.52, 0.2; GCF_000750535.1, s__Weissella ceti_A, 95.0, 78.01, 0.22; GCF_001761545.1, s__Weissella soli, 95.0, 77.89, 0…	67.45	11	N/A	N/A
C4A_bin.6	d__Bacteria;p__Firmicutes;c__Bacilli;o__Lactobacillales;f__Lactobacillaceae;g__Weissella;s__Weissella confusa	GCA_001436895.1	95	d__Bacteria;p__Firmicutes;c__Bacilli;o__Lactobacillales;f__Lactobacillaceae;g__Weissella;s__Weissella confusa	97.65	0.91	GCA_001436895.1	95	d__Bacteria;p__Firmicutes;c__Bacilli;o__Lactobacillales;f__Lactobacillaceae;g__Weissella;s__Weissella confusa	97.65	0.91	d__Bacteria;p__Firmicutes;c__Bacilli;o__Lactobacillales;f__Lactobacillaceae;g__Weissella;s__	taxonomic classification defined by topology and ANI	topological placement and ANI have congruent species assignments	GCF_004766315.1, s__Weissella confusa_A, 95.0, 91.8, 0.82; GCF_004771295.1, s__Weissella confusa_B, 95.0, 91.62, 0.86; GCF_000193635.1, s__Weissella cibaria, 95.0, 81.63, 0.53; GCF_004521965.1, s__Weissella cibaria_A, 95.0, 80.98, 0.46; GCF_018394055.1, s__Weissella ceti, 95.0, 78.06, 0.18; GCF_900094835.1, s__Weissella bombi, 95.0, 77.61, 0.17; GCF_000750535.1, s__Weissella ceti_A, 95.0, 77.49, …	59.71	11	N/A	N/A
C4C_bin.6	d__Bacteria;p__Firmicutes;c__Bacilli;o__Lactobacillales;f__Lactobacillaceae;g__Weissella;s__Weissella confusa	GCA_001436895.1	95	d__Bacteria;p__Firmicutes;c__Bacilli;o__Lactobacillales;f__Lactobacillaceae;g__Weissella;s__Weissella confusa	97.72	0.89	GCA_001436895.1	95	d__Bacteria;p__Firmicutes;c__Bacilli;o__Lactobacillales;f__Lactobacillaceae;g__Weissella;s__Weissella confusa	97.72	0.89	d__Bacteria;p__Firmicutes;c__Bacilli;o__Lactobacillales;f__Lactobacillaceae;g__Weissella;s__	taxonomic classification defined by topology and ANI	topological placement and ANI have congruent species assignments	GCF_004766315.1, s__Weissella confusa_A, 95.0, 91.99, 0.78; GCF_004771295.1, s__Weissella confusa_B, 95.0, 91.72, 0.84; GCF_000193635.1, s__Weissella cibaria, 95.0, 82.12, 0.54; GCF_004521965.1, s__Weissella cibaria_A, 95.0, 81.51, 0.5; GCF_018394055.1, s__Weissella ceti, 95.0, 78.42, 0.22; GCF_000750535.1, s__Weissella ceti_A, 95.0, 78.06, 0.24; GCF_900094835.1, s__Weissella bombi, 95.0, 77.82, …	69.7	11	N/A	N/A
C15A_bin.1	d__Bacteria;p__Firmicutes;c__Bacilli;o__Lactobacillales;f__Lactobacillaceae;g__Weissella;s__Weissella hellenica	GCF_006777025.1	95	d__Bacteria;p__Firmicutes;c__Bacilli;o__Lactobacillales;f__Lactobacillaceae;g__Weissella;s__Weissella hellenica	99.13	0.89	GCF_006777025.1	95	d__Bacteria;p__Firmicutes;c__Bacilli;o__Lactobacillales;f__Lactobacillaceae;g__Weissella;s__Weissella hellenica_B	99.13	0.89	d__Bacteria;p__Firmicutes;c__Bacilli;o__Lactobacillales;f__Lactobacillaceae;g__Weissella;s__	taxonomic classification defined by topology and ANI	topological placement and ANI have congruent species assignments	GCF_005405545.1, s__Weissella hellenica, 95.0, 90.71, 0.81; GCF_900094835.1, s__Weissella bombi, 95.0, 85.27, 0.8; GCF_000160575.1, s__Weissella paramesenteroides, 95.0, 80.48, 0.56; GCF_005405465.1, s__Weissella thailandensis, 95.0, 80.41, 0.56; GCF_004771295.1, s__Weissella confusa_B, 95.0, 79.62, 0.2; GCF_000193635.1, s__Weissella cibaria, 95.0, 79.56, 0.24; GCA_001436895.1, s__Weissella confu…	87.13	11	N/A	N/A
C15B_bin.8	d__Bacteria;p__Firmicutes;c__Bacilli;o__Lactobacillales;f__Lactobacillaceae;g__Weissella;s__Weissella hellenica	GCF_006777025.1	95	d__Bacteria;p__Firmicutes;c__Bacilli;o__Lactobacillales;f__Lactobacillaceae;g__Weissella;s__Weissella hellenica	99.17	0.96	GCF_006777025.1	95	d__Bacteria;p__Firmicutes;c__Bacilli;o__Lactobacillales;f__Lactobacillaceae;g__Weissella;s__Weissella hellenica_B	99.17	0.96	d__Bacteria;p__Firmicutes;c__Bacilli;o__Lactobacillales;f__Lactobacillaceae;g__Weissella;s__	taxonomic classification defined by topology and ANI	topological placement and ANI have congruent species assignments	GCF_005405545.1, s__Weissella hellenica, 95.0, 90.37, 0.86; GCF_900094835.1, s__Weissella bombi, 95.0, 84.98, 0.83; GCF_005405465.1, s__Weissella thailandensis, 95.0, 80.34, 0.56; GCF_000160575.1, s__Weissella paramesenteroides, 95.0, 80.34, 0.56; GCA_001436895.1, s__Weissella confusa, 95.0, 79.05, 0.18; GCF_004766315.1, s__Weissella confusa_A, 95.0, 78.84, 0.19; GCF_004771295.1, s__Weissella con…	86.14	11	N/A	N/A
C15C_bin.8	d__Bacteria;p__Firmicutes;c__Bacilli;o__Lactobacillales;f__Lactobacillaceae;g__Weissella;s__Weissella hellenica	GCF_006777025.1	95	d__Bacteria;p__Firmicutes;c__Bacilli;o__Lactobacillales;f__Lactobacillaceae;g__Weissella;s__Weissella hellenica	99.17	0.97	GCF_006777025.1	95	d__Bacteria;p__Firmicutes;c__Bacilli;o__Lactobacillales;f__Lactobacillaceae;g__Weissella;s__Weissella hellenica_B	99.17	0.97	d__Bacteria;p__Firmicutes;c__Bacilli;o__Lactobacillales;f__Lactobacillaceae;g__Weissella;s__	taxonomic classification defined by topology and ANI	topological placement and ANI have congruent species assignments	GCF_005405545.1, s__Weissella hellenica, 95.0, 90.48, 0.89; GCF_900094835.1, s__Weissella bombi, 95.0, 85.08, 0.86; GCF_000160575.1, s__Weissella paramesenteroides, 95.0, 80.37, 0.59; GCF_005405465.1, s__Weissella thailandensis, 95.0, 80.23, 0.59; GCA_001436895.1, s__Weissella confusa, 95.0, 78.67, 0.21; GCF_004771295.1, s__Weissella confusa_B, 95.0, 78.63, 0.22; GCF_004766315.1, s__Weissella con…	87.17	11	N/A	N/A
C2A_bin.5	d__Bacteria;p__Firmicutes;c__Bacilli;o__Lactobacillales;f__Lactobacillaceae;g__Weissella;s__Weissella hellenica	GCF_006777025.1	95	d__Bacteria;p__Firmicutes;c__Bacilli;o__Lactobacillales;f__Lactobacillaceae;g__Weissella;s__Weissella hellenica	99.27	0.96	GCF_006777025.1	95	d__Bacteria;p__Firmicutes;c__Bacilli;o__Lactobacillales;f__Lactobacillaceae;g__Weissella;s__Weissella hellenica_B	99.27	0.96	d__Bacteria;p__Firmicutes;c__Bacilli;o__Lactobacillales;f__Lactobacillaceae;g__Weissella;s__	taxonomic classification defined by topology and ANI	topological placement and ANI have congruent species assignments	GCF_005405545.1, s__Weissella hellenica, 95.0, 90.41, 0.89; GCF_900094835.1, s__Weissella bombi, 95.0, 85.17, 0.82; GCF_000160575.1, s__Weissella paramesenteroides, 95.0, 80.56, 0.56; GCF_005405465.1, s__Weissella thailandensis, 95.0, 80.4, 0.57; GCA_001436895.1, s__Weissella confusa, 95.0, 78.9, 0.21; GCF_004771295.1, s__Weissella confusa_B, 95.0, 78.85, 0.22; GCF_004766315.1, s__Weissella confu…	92.08	11	N/A	N/A
C2B_bin.5	d__Bacteria;p__Firmicutes;c__Bacilli;o__Lactobacillales;f__Lactobacillaceae;g__Weissella;s__Weissella hellenica	GCF_006777025.1	95	d__Bacteria;p__Firmicutes;c__Bacilli;o__Lactobacillales;f__Lactobacillaceae;g__Weissella;s__Weissella hellenica	98.98	0.94	GCF_006777025.1	95	d__Bacteria;p__Firmicutes;c__Bacilli;o__Lactobacillales;f__Lactobacillaceae;g__Weissella;s__Weissella hellenica_B	98.98	0.94	d__Bacteria;p__Firmicutes;c__Bacilli;o__Lactobacillales;f__Lactobacillaceae;g__Weissella;s__	taxonomic classification defined by topology and ANI	topological placement and ANI have congruent species assignments	GCF_005405545.1, s__Weissella hellenica, 95.0, 90.41, 0.86; GCF_900094835.1, s__Weissella bombi, 95.0, 85.14, 0.83; GCF_005405465.1, s__Weissella thailandensis, 95.0, 80.42, 0.58; GCF_000160575.1, s__Weissella paramesenteroides, 95.0, 80.32, 0.57; GCF_004771295.1, s__Weissella confusa_B, 95.0, 79.12, 0.21; GCF_001437355.1, s__Weissella viridescens, 95.0, 79.08, 0.15; GCF_004766315.1, s__Weissella…	83.98	11	N/A	N/A
C2C_bin.8	d__Bacteria;p__Firmicutes;c__Bacilli;o__Lactobacillales;f__Lactobacillaceae;g__Weissella;s__Weissella hellenica	GCF_006777025.1	95	d__Bacteria;p__Firmicutes;c__Bacilli;o__Lactobacillales;f__Lactobacillaceae;g__Weissella;s__Weissella hellenica	99.16	0.94	GCF_006777025.1	95	d__Bacteria;p__Firmicutes;c__Bacilli;o__Lactobacillales;f__Lactobacillaceae;g__Weissella;s__Weissella hellenica_B	99.16	0.94	d__Bacteria;p__Firmicutes;c__Bacilli;o__Lactobacillales;f__Lactobacillaceae;g__Weissella;s__	taxonomic classification defined by topology and ANI	topological placement and ANI have congruent species assignments	GCF_005405545.1, s__Weissella hellenica, 95.0, 90.55, 0.85; GCF_900094835.1, s__Weissella bombi, 95.0, 85.14, 0.84; GCF_005405465.1, s__Weissella thailandensis, 95.0, 80.43, 0.56; GCF_000160575.1, s__Weissella paramesenteroides, 95.0, 80.33, 0.58; GCA_001436895.1, s__Weissella confusa, 95.0, 79.08, 0.22; GCF_004766315.1, s__Weissella confusa_A, 95.0, 78.98, 0.22; GCF_004771295.1, s__Weissella con…	81.89	11	N/A	N/A
C40B_bin.3	d__Bacteria;p__Firmicutes;c__Bacilli;o__Lactobacillales;f__Lactobacillaceae;g__Weissella;s__Weissella hellenica	GCF_006777025.1	95	d__Bacteria;p__Firmicutes;c__Bacilli;o__Lactobacillales;f__Lactobacillaceae;g__Weissella;s__Weissella hellenica	99.29	0.92	GCF_006777025.1	95	d__Bacteria;p__Firmicutes;c__Bacilli;o__Lactobacillales;f__Lactobacillaceae;g__Weissella;s__Weissella hellenica_B	99.29	0.92	d__Bacteria;p__Firmicutes;c__Bacilli;o__Lactobacillales;f__Lactobacillaceae;g__Weissella;s__	taxonomic classification defined by topology and ANI	topological placement and ANI have congruent species assignments	GCF_005405545.1, s__Weissella hellenica, 95.0, 90.45, 0.87; GCF_900094835.1, s__Weissella bombi, 95.0, 85.17, 0.8; GCF_005405465.1, s__Weissella thailandensis, 95.0, 80.65, 0.57; GCF_000160575.1, s__Weissella paramesenteroides, 95.0, 80.35, 0.6; GCA_001436895.1, s__Weissella confusa, 95.0, 79.22, 0.21; GCF_003862435.1, s__Weissella viridescens_A, 95.0, 78.8, 0.15; GCF_004771295.1, s__Weissella co…	78.93	11	N/A	N/A
C40C_bin.2	d__Bacteria;p__Firmicutes;c__Bacilli;o__Lactobacillales;f__Lactobacillaceae;g__Weissella;s__Weissella hellenica	GCF_006777025.1	95	d__Bacteria;p__Firmicutes;c__Bacilli;o__Lactobacillales;f__Lactobacillaceae;g__Weissella;s__Weissella hellenica	99.19	0.96	GCF_006777025.1	95	d__Bacteria;p__Firmicutes;c__Bacilli;o__Lactobacillales;f__Lactobacillaceae;g__Weissella;s__Weissella hellenica_B	99.19	0.96	d__Bacteria;p__Firmicutes;c__Bacilli;o__Lactobacillales;f__Lactobacillaceae;g__Weissella;s__	taxonomic classification defined by topology and ANI	topological placement and ANI have congruent species assignments	GCF_005405545.1, s__Weissella hellenica, 95.0, 90.43, 0.89; GCF_900094835.1, s__Weissella bombi, 95.0, 85.07, 0.83; GCF_000160575.1, s__Weissella paramesenteroides, 95.0, 80.26, 0.58; GCF_005405465.1, s__Weissella thailandensis, 95.0, 80.17, 0.57; GCA_001436895.1, s__Weissella confusa, 95.0, 78.65, 0.2; GCF_004771295.1, s__Weissella confusa_B, 95.0, 78.61, 0.21; GCF_004766315.1, s__Weissella conf…	83.44	11	N/A	N/A
C4A_bin.1	d__Bacteria;p__Firmicutes;c__Bacilli;o__Lactobacillales;f__Lactobacillaceae;g__Weissella;s__Weissella hellenica	GCF_006777025.1	95	d__Bacteria;p__Firmicutes;c__Bacilli;o__Lactobacillales;f__Lactobacillaceae;g__Weissella;s__Weissella hellenica	99.05	0.95	GCF_006777025.1	95	d__Bacteria;p__Firmicutes;c__Bacilli;o__Lactobacillales;f__Lactobacillaceae;g__Weissella;s__Weissella hellenica_B	99.05	0.95	d__Bacteria;p__Firmicutes;c__Bacilli;o__Lactobacillales;f__Lactobacillaceae;g__Weissella;s__	taxonomic classification defined by topology and ANI	topological placement and ANI have congruent species assignments	GCF_005405545.1, s__Weissella hellenica, 95.0, 90.31, 0.87; GCF_900094835.1, s__Weissella bombi, 95.0, 84.95, 0.84; GCF_005405465.1, s__Weissella thailandensis, 95.0, 80.44, 0.58; GCF_000160575.1, s__Weissella paramesenteroides, 95.0, 79.98, 0.58; GCA_001436895.1, s__Weissella confusa, 95.0, 78.84, 0.19; GCF_004771295.1, s__Weissella confusa_B, 95.0, 78.65, 0.21; GCF_004766315.1, s__Weissella con…	84.53	11	N/A	N/A
C4B_bin.6	d__Bacteria;p__Firmicutes;c__Bacilli;o__Lactobacillales;f__Lactobacillaceae;g__Weissella;s__Weissella hellenica	GCF_006777025.1	95	d__Bacteria;p__Firmicutes;c__Bacilli;o__Lactobacillales;f__Lactobacillaceae;g__Weissella;s__Weissella hellenica	99.22	0.95	GCF_006777025.1	95	d__Bacteria;p__Firmicutes;c__Bacilli;o__Lactobacillales;f__Lactobacillaceae;g__Weissella;s__Weissella hellenica_B	99.22	0.95	d__Bacteria;p__Firmicutes;c__Bacilli;o__Lactobacillales;f__Lactobacillaceae;g__Weissella;s__	taxonomic classification defined by topology and ANI	topological placement and ANI have congruent species assignments	GCF_005405545.1, s__Weissella hellenica, 95.0, 90.3, 0.88; GCF_900094835.1, s__Weissella bombi, 95.0, 84.93, 0.82; GCF_005405465.1, s__Weissella thailandensis, 95.0, 80.47, 0.54; GCF_000160575.1, s__Weissella paramesenteroides, 95.0, 80.27, 0.56; GCA_001436895.1, s__Weissella confusa, 95.0, 78.74, 0.2; GCF_000193635.1, s__Weissella cibaria, 95.0, 78.74, 0.2; GCF_004771295.1, s__Weissella confusa_…	90.17	11	N/A	N/A
C4C_bin.9	d__Bacteria;p__Firmicutes;c__Bacilli;o__Lactobacillales;f__Lactobacillaceae;g__Weissella;s__Weissella hellenica	GCF_006777025.1	95	d__Bacteria;p__Firmicutes;c__Bacilli;o__Lactobacillales;f__Lactobacillaceae;g__Weissella;s__Weissella hellenica	99.19	0.93	GCF_006777025.1	95	d__Bacteria;p__Firmicutes;c__Bacilli;o__Lactobacillales;f__Lactobacillaceae;g__Weissella;s__Weissella hellenica_B	99.19	0.93	d__Bacteria;p__Firmicutes;c__Bacilli;o__Lactobacillales;f__Lactobacillaceae;g__Weissella;s__	taxonomic classification defined by topology and ANI	topological placement and ANI have congruent species assignments	GCF_005405545.1, s__Weissella hellenica, 95.0, 90.47, 0.86; GCF_900094835.1, s__Weissella bombi, 95.0, 85.06, 0.8; GCF_005405465.1, s__Weissella thailandensis, 95.0, 80.89, 0.54; GCF_000160575.1, s__Weissella paramesenteroides, 95.0, 80.44, 0.57; GCF_004771295.1, s__Weissella confusa_B, 95.0, 78.97, 0.18; GCA_001436895.1, s__Weissella confusa, 95.0, 78.88, 0.19; GCF_000193635.1, s__Weissella ciba…	92.08	11	N/A	N/A
C8A_bin.1	d__Bacteria;p__Firmicutes;c__Bacilli;o__Lactobacillales;f__Lactobacillaceae;g__Weissella;s__Weissella hellenica	GCF_006777025.1	95	d__Bacteria;p__Firmicutes;c__Bacilli;o__Lactobacillales;f__Lactobacillaceae;g__Weissella;s__Weissella hellenica	99.05	0.96	GCF_006777025.1	95	d__Bacteria;p__Firmicutes;c__Bacilli;o__Lactobacillales;f__Lactobacillaceae;g__Weissella;s__Weissella hellenica_B	99.05	0.96	d__Bacteria;p__Firmicutes;c__Bacilli;o__Lactobacillales;f__Lactobacillaceae;g__Weissella;s__	taxonomic classification defined by topology and ANI	topological placement and ANI have congruent species assignments	GCF_005405545.1, s__Weissella hellenica, 95.0, 90.31, 0.89; GCF_900094835.1, s__Weissella bombi, 95.0, 85.02, 0.86; GCF_005405465.1, s__Weissella thailandensis, 95.0, 80.55, 0.58; GCF_000160575.1, s__Weissella paramesenteroides, 95.0, 80.37, 0.59; GCA_001436895.1, s__Weissella confusa, 95.0, 79.22, 0.18; GCF_004771295.1, s__Weissella confusa_B, 95.0, 79.07, 0.2; GCF_004766315.1, s__Weissella conf…	86.99	11	N/A	N/A
C8B_bin.2	d__Bacteria;p__Firmicutes;c__Bacilli;o__Lactobacillales;f__Lactobacillaceae;g__Weissella;s__Weissella hellenica	GCF_006777025.1	95	d__Bacteria;p__Firmicutes;c__Bacilli;o__Lactobacillales;f__Lactobacillaceae;g__Weissella;s__Weissella hellenica	99.36	0.96	GCF_006777025.1	95	d__Bacteria;p__Firmicutes;c__Bacilli;o__Lactobacillales;f__Lactobacillaceae;g__Weissella;s__Weissella hellenica_B	99.36	0.96	d__Bacteria;p__Firmicutes;c__Bacilli;o__Lactobacillales;f__Lactobacillaceae;g__Weissella;s__	taxonomic classification defined by topology and ANI	topological placement and ANI have congruent species assignments	GCF_005405545.1, s__Weissella hellenica, 95.0, 90.72, 0.9; GCF_900094835.1, s__Weissella bombi, 95.0, 85.33, 0.84; GCF_000160575.1, s__Weissella paramesenteroides, 95.0, 80.47, 0.61; GCF_005405465.1, s__Weissella thailandensis, 95.0, 80.27, 0.6; GCF_004771295.1, s__Weissella confusa_B, 95.0, 79.38, 0.19; GCA_001436895.1, s__Weissella confusa, 95.0, 79.35, 0.19; GCF_000691805.2, s__Weissella oryza…	86.44	11	N/A	N/A
C8C_bin.2	d__Bacteria;p__Firmicutes;c__Bacilli;o__Lactobacillales;f__Lactobacillaceae;g__Weissella;s__Weissella hellenica	GCF_006777025.1	95	d__Bacteria;p__Firmicutes;c__Bacilli;o__Lactobacillales;f__Lactobacillaceae;g__Weissella;s__Weissella hellenica	99.31	0.95	GCF_006777025.1	95	d__Bacteria;p__Firmicutes;c__Bacilli;o__Lactobacillales;f__Lactobacillaceae;g__Weissella;s__Weissella hellenica_B	99.31	0.95	d__Bacteria;p__Firmicutes;c__Bacilli;o__Lactobacillales;f__Lactobacillaceae;g__Weissella;s__	taxonomic classification defined by topology and ANI	topological placement and ANI have congruent species assignments	GCF_005405545.1, s__Weissella hellenica, 95.0, 90.62, 0.91; GCF_900094835.1, s__Weissella bombi, 95.0, 85.11, 0.84; GCF_000160575.1, s__Weissella paramesenteroides, 95.0, 80.46, 0.58; GCF_005405465.1, s__Weissella thailandensis, 95.0, 80.34, 0.57; GCF_004766315.1, s__Weissella confusa_A, 95.0, 79.16, 0.19; GCF_001437355.1, s__Weissella viridescens, 95.0, 78.96, 0.15; GCF_000193635.1, s__Weissella…	86.62	11	N/A	N/A
C40C_bin.8	d__Bacteria;p__Firmicutes;c__Bacilli;o__Lactobacillales;f__Lactobacillaceae;g__Weissella;s__Weissella paramesenteroides	GCF_000160575.1	95	d__Bacteria;p__Firmicutes;c__Bacilli;o__Lactobacillales;f__Lactobacillaceae;g__Weissella;s__Weissella paramesenteroides	98.85	0.8	GCF_000160575.1	95	d__Bacteria;p__Firmicutes;c__Bacilli;o__Lactobacillales;f__Lactobacillaceae;g__Weissella;s__Weissella paramesenteroides	98.85	0.8	d__Bacteria;p__Firmicutes;c__Bacilli;o__Lactobacillales;f__Lactobacillaceae;g__Weissella;s__	taxonomic classification defined by topology and ANI	topological placement and ANI have congruent species assignments	GCF_005405465.1, s__Weissella thailandensis, 95.0, 82.98, 0.7; GCF_006777025.1, s__Weissella hellenica_B, 95.0, 80.49, 0.51; GCF_900094835.1, s__Weissella bombi, 95.0, 79.65, 0.51; GCF_005405545.1, s__Weissella hellenica, 95.0, 79.62, 0.49; GCF_004766315.1, s__Weissella confusa_A, 95.0, 77.91, 0.08; GCF_004771295.1, s__Weissella confusa_B, 95.0, 77.48, 0.18; GCF_000193635.1, s__Weissella cibaria,…	51.37	11	N/A	N/A
C4C_bin.8	d__Bacteria;p__Firmicutes;c__Bacilli;o__Lactobacillales;f__Streptococcaceae;g__Lactococcus;s__Lactococcus sp	N/A	N/A	N/A	N/A	N/A	GCF_000739975.1	95	d__Bacteria;p__Firmicutes;c__Bacilli;o__Lactobacillales;f__Streptococcaceae;g__Lactococcus;s__Lactococcus garvieae	97.45	0.38	d__Bacteria;p__Firmicutes;c__Bacilli;o__Lactobacillales;f__Streptococcaceae;g__Lactococcus;s__	taxonomic classification defined by topology and ANI	classification based on placement in class-level tree	GCF_002154895.1, s__Lactococcus petauri, 95.0, 92.58, 0.38; GCF_018403745.1, s__Lactococcus formosensis, 95.0, 90.84, 0.37; GCF_016758115.1, s__Lactococcus sp002492185, 95.0, 83.48, 0.32; GCF_016027715.1, s__Lactococcus garvieae_A, 95.0, 82.75, 0.34; GCF_900099625.1, s__Lactococcus lactis, 95.0, 81.28, 0.18; GCF_001591705.1, s__Lactococcus cremoris, 95.0, 79.43, 0.15; GCF_004210295.1, s__Lactococ…	72.02	11	0.999619	N/A
C8A_bin.4	d__Bacteria;p__Firmicutes;c__Bacilli;o__Lactobacillales;f__Streptococcaceae;g__Lactococcus;s__Lactococcus sp	N/A	N/A	N/A	N/A	N/A	GCF_000739975.1	95	d__Bacteria;p__Firmicutes;c__Bacilli;o__Lactobacillales;f__Streptococcaceae;g__Lactococcus;s__Lactococcus garvieae	96.49	0.25	d__Bacteria;p__Firmicutes;c__Bacilli;o__Lactobacillales;f__Streptococcaceae;g__Lactococcus;s__	taxonomic classification defined by topology and ANI	classification based on placement in class-level tree	GCF_002154895.1, s__Lactococcus petauri, 95.0, 90.94, 0.24; GCF_018403745.1, s__Lactococcus formosensis, 95.0, 89.86, 0.25; GCF_016758115.1, s__Lactococcus sp002492185, 95.0, 83.44, 0.18; GCF_900099625.1, s__Lactococcus lactis, 95.0, 83.22, 0.22; GCF_001591705.1, s__Lactococcus cremoris, 95.0, 82.59, 0.16; GCF_016027715.1, s__Lactococcus garvieae_A, 95.0, 82.37, 0.23	49.42	11	0.999701	N/A
C15B_bin.5	d__Bacteria;p__Firmicutes;c__Bacilli;o__Lactobacillales;f__Streptococcaceae;g__Lactococcus;s__Lactococcus lactis	GCF_900099625.1	95	d__Bacteria;p__Firmicutes;c__Bacilli;o__Lactobacillales;f__Streptococcaceae;g__Lactococcus;s__Lactococcus lactis	99.31	0.94	GCF_900099625.1	95	d__Bacteria;p__Firmicutes;c__Bacilli;o__Lactobacillales;f__Streptococcaceae;g__Lactococcus;s__Lactococcus lactis	99.31	0.94	d__Bacteria;p__Firmicutes;c__Bacilli;o__Lactobacillales;f__Streptococcaceae;g__Lactococcus;s__	taxonomic classification defined by topology and ANI	topological placement and ANI have congruent species assignments	GCF_001591705.1, s__Lactococcus cremoris, 95.0, 88.16, 0.86; GCF_014905395.1, s__Lactococcus taiwanensis, 95.0, 84.59, 0.59; GCF_004210295.1, s__Lactococcus sp004210295, 95.0, 81.33, 0.59; GCF_003627095.1, s__Lactococcus allomyrinae, 95.0, 79.38, 0.52; GCF_006965445.1, s__Lactococcus sp006965445, 95.0, 79.09, 0.53; GCF_016027715.1, s__Lactococcus garvieae_A, 95.0, 78.73, 0.25; GCF_018403745.1, s_…	82.84	11	N/A	N/A
C15C_bin.1	d__Bacteria;p__Firmicutes;c__Bacilli;o__Lactobacillales;f__Streptococcaceae;g__Lactococcus;s__Lactococcus lactis	GCF_900099625.1	95	d__Bacteria;p__Firmicutes;c__Bacilli;o__Lactobacillales;f__Streptococcaceae;g__Lactococcus;s__Lactococcus lactis	99.06	0.88	GCF_900099625.1	95	d__Bacteria;p__Firmicutes;c__Bacilli;o__Lactobacillales;f__Streptococcaceae;g__Lactococcus;s__Lactococcus lactis	99.06	0.88	d__Bacteria;p__Firmicutes;c__Bacilli;o__Lactobacillales;f__Streptococcaceae;g__Lactococcus;s__	taxonomic classification defined by topology and ANI	topological placement and ANI have congruent species assignments	GCF_001591705.1, s__Lactococcus cremoris, 95.0, 87.34, 0.79; GCF_014905395.1, s__Lactococcus taiwanensis, 95.0, 84.67, 0.52; GCF_004210295.1, s__Lactococcus sp004210295, 95.0, 81.28, 0.52; GCF_003627095.1, s__Lactococcus allomyrinae, 95.0, 78.95, 0.49; GCF_006965445.1, s__Lactococcus sp006965445, 95.0, 78.95, 0.48; GCF_018403745.1, s__Lactococcus formosensis, 95.0, 78.31, 0.19; GCF_016027715.1, s…	62.41	11	N/A	N/A
C2A_bin.2	d__Bacteria;p__Firmicutes;c__Bacilli;o__Lactobacillales;f__Streptococcaceae;g__Lactococcus;s__Lactococcus lactis	GCF_900099625.1	95	d__Bacteria;p__Firmicutes;c__Bacilli;o__Lactobacillales;f__Streptococcaceae;g__Lactococcus;s__Lactococcus lactis	99.21	0.95	GCF_900099625.1	95	d__Bacteria;p__Firmicutes;c__Bacilli;o__Lactobacillales;f__Streptococcaceae;g__Lactococcus;s__Lactococcus lactis	99.21	0.95	d__Bacteria;p__Firmicutes;c__Bacilli;o__Lactobacillales;f__Streptococcaceae;g__Lactococcus;s__	taxonomic classification defined by topology and ANI	topological placement and ANI have congruent species assignments	GCF_001591705.1, s__Lactococcus cremoris, 95.0, 88.09, 0.89; GCF_014905395.1, s__Lactococcus taiwanensis, 95.0, 84.68, 0.56; GCF_004210295.1, s__Lactococcus sp004210295, 95.0, 81.45, 0.57; GCF_003627095.1, s__Lactococcus allomyrinae, 95.0, 79.72, 0.53; GCF_006965445.1, s__Lactococcus sp006965445, 95.0, 79.63, 0.52; GCF_018403745.1, s__Lactococcus formosensis, 95.0, 79.25, 0.21; GCF_016027715.1, s…	81.18	11	N/A	N/A
C2B_bin.2	d__Bacteria;p__Firmicutes;c__Bacilli;o__Lactobacillales;f__Streptococcaceae;g__Lactococcus;s__Lactococcus lactis	GCF_900099625.1	95	d__Bacteria;p__Firmicutes;c__Bacilli;o__Lactobacillales;f__Streptococcaceae;g__Lactococcus;s__Lactococcus lactis	99.32	0.97	GCF_900099625.1	95	d__Bacteria;p__Firmicutes;c__Bacilli;o__Lactobacillales;f__Streptococcaceae;g__Lactococcus;s__Lactococcus lactis	99.32	0.97	d__Bacteria;p__Firmicutes;c__Bacilli;o__Lactobacillales;f__Streptococcaceae;g__Lactococcus;s__	taxonomic classification defined by topology and ANI	topological placement and ANI have congruent species assignments	GCF_001591705.1, s__Lactococcus cremoris, 95.0, 88.27, 0.87; GCF_014905395.1, s__Lactococcus taiwanensis, 95.0, 85.22, 0.57; GCF_004210295.1, s__Lactococcus sp004210295, 95.0, 81.81, 0.59; GCF_003627095.1, s__Lactococcus allomyrinae, 95.0, 79.7, 0.52; GCF_006965445.1, s__Lactococcus sp006965445, 95.0, 79.5, 0.52; GCF_016027715.1, s__Lactococcus garvieae_A, 95.0, 79.04, 0.24; GCF_018403745.1, s__L…	86.1	11	N/A	N/A
C2C_bin.5	d__Bacteria;p__Firmicutes;c__Bacilli;o__Lactobacillales;f__Streptococcaceae;g__Lactococcus;s__Lactococcus lactis	GCF_900099625.1	95	d__Bacteria;p__Firmicutes;c__Bacilli;o__Lactobacillales;f__Streptococcaceae;g__Lactococcus;s__Lactococcus lactis	99.21	0.97	GCF_900099625.1	95	d__Bacteria;p__Firmicutes;c__Bacilli;o__Lactobacillales;f__Streptococcaceae;g__Lactococcus;s__Lactococcus lactis	99.21	0.97	d__Bacteria;p__Firmicutes;c__Bacilli;o__Lactobacillales;f__Streptococcaceae;g__Lactococcus;s__	taxonomic classification defined by topology and ANI	topological placement and ANI have congruent species assignments	GCF_001591705.1, s__Lactococcus cremoris, 95.0, 88.01, 0.85; GCF_014905395.1, s__Lactococcus taiwanensis, 95.0, 84.67, 0.53; GCF_004210295.1, s__Lactococcus sp004210295, 95.0, 81.33, 0.54; GCF_006965445.1, s__Lactococcus sp006965445, 95.0, 79.32, 0.5; GCF_003627095.1, s__Lactococcus allomyrinae, 95.0, 79.29, 0.52; GCF_018403745.1, s__Lactococcus formosensis, 95.0, 78.8, 0.2; GCF_009601015.1, s__L…	93.47	11	N/A	N/A
C40C_bin.3	d__Bacteria;p__Firmicutes;c__Bacilli;o__Lactobacillales;f__Streptococcaceae;g__Lactococcus;s__Lactococcus lactis	GCF_900099625.1	95	d__Bacteria;p__Firmicutes;c__Bacilli;o__Lactobacillales;f__Streptococcaceae;g__Lactococcus;s__Lactococcus lactis	97.6	0.87	GCF_900099625.1	95	d__Bacteria;p__Firmicutes;c__Bacilli;o__Lactobacillales;f__Streptococcaceae;g__Lactococcus;s__Lactococcus lactis	97.6	0.87	d__Bacteria;p__Firmicutes;c__Bacilli;o__Lactobacillales;f__Streptococcaceae;g__Lactococcus;s__	taxonomic classification defined by topology and ANI	topological placement and ANI have congruent species assignments	GCF_001591705.1, s__Lactococcus cremoris, 95.0, 87.4, 0.76; GCF_014905395.1, s__Lactococcus taiwanensis, 95.0, 84.48, 0.52; GCF_004210295.1, s__Lactococcus sp004210295, 95.0, 81.27, 0.55; GCF_003627095.1, s__Lactococcus allomyrinae, 95.0, 79.87, 0.4; GCF_006965445.1, s__Lactococcus sp006965445, 95.0, 79.0, 0.41; GCF_018403765.1, s__Lactococcus nasutitermitis, 95.0, 78.17, 0.08; GCF_009601015.1, s…	62.99	11	N/A	N/A
C4A_bin.2	d__Bacteria;p__Firmicutes;c__Bacilli;o__Lactobacillales;f__Streptococcaceae;g__Lactococcus;s__Lactococcus lactis	GCF_900099625.1	95	d__Bacteria;p__Firmicutes;c__Bacilli;o__Lactobacillales;f__Streptococcaceae;g__Lactococcus;s__Lactococcus lactis	99.22	0.97	GCF_900099625.1	95	d__Bacteria;p__Firmicutes;c__Bacilli;o__Lactobacillales;f__Streptococcaceae;g__Lactococcus;s__Lactococcus lactis	99.22	0.97	d__Bacteria;p__Firmicutes;c__Bacilli;o__Lactobacillales;f__Streptococcaceae;g__Lactococcus;s__	taxonomic classification defined by topology and ANI	topological placement and ANI have congruent species assignments	GCF_001591705.1, s__Lactococcus cremoris, 95.0, 88.06, 0.86; GCF_014905395.1, s__Lactococcus taiwanensis, 95.0, 84.9, 0.55; GCF_004210295.1, s__Lactococcus sp004210295, 95.0, 81.52, 0.56; GCF_006965445.1, s__Lactococcus sp006965445, 95.0, 79.39, 0.49; GCF_003627095.1, s__Lactococcus allomyrinae, 95.0, 79.38, 0.49; GCF_009601015.1, s__Lactococcus hircilactis, 95.0, 78.99, 0.25; GCF_018403745.1, s_…	94.82	11	N/A	N/A
C4B_bin.2	d__Bacteria;p__Firmicutes;c__Bacilli;o__Lactobacillales;f__Streptococcaceae;g__Lactococcus;s__Lactococcus lactis	GCF_900099625.1	95	d__Bacteria;p__Firmicutes;c__Bacilli;o__Lactobacillales;f__Streptococcaceae;g__Lactococcus;s__Lactococcus lactis	99.19	0.94	GCF_900099625.1	95	d__Bacteria;p__Firmicutes;c__Bacilli;o__Lactobacillales;f__Streptococcaceae;g__Lactococcus;s__Lactococcus lactis	99.19	0.94	d__Bacteria;p__Firmicutes;c__Bacilli;o__Lactobacillales;f__Streptococcaceae;g__Lactococcus;s__	taxonomic classification defined by topology and ANI	topological placement and ANI have congruent species assignments	GCF_001591705.1, s__Lactococcus cremoris, 95.0, 88.01, 0.81; GCF_014905395.1, s__Lactococcus taiwanensis, 95.0, 84.72, 0.51; GCF_004210295.1, s__Lactococcus sp004210295, 95.0, 81.32, 0.53; GCF_003627095.1, s__Lactococcus allomyrinae, 95.0, 79.48, 0.48; GCF_006965445.1, s__Lactococcus sp006965445, 95.0, 79.43, 0.49; GCF_018403745.1, s__Lactococcus formosensis, 95.0, 79.04, 0.19; GCF_016027715.1, s…	95.21	11	N/A	N/A
C4C_bin.2	d__Bacteria;p__Firmicutes;c__Bacilli;o__Lactobacillales;f__Streptococcaceae;g__Lactococcus;s__Lactococcus lactis	GCF_900099625.1	95	d__Bacteria;p__Firmicutes;c__Bacilli;o__Lactobacillales;f__Streptococcaceae;g__Lactococcus;s__Lactococcus lactis	99.34	0.88	GCF_900099625.1	95	d__Bacteria;p__Firmicutes;c__Bacilli;o__Lactobacillales;f__Streptococcaceae;g__Lactococcus;s__Lactococcus lactis	99.34	0.88	d__Bacteria;p__Firmicutes;c__Bacilli;o__Lactobacillales;f__Streptococcaceae;g__Lactococcus;s__	taxonomic classification defined by topology and ANI	topological placement and ANI have congruent species assignments	GCF_001591705.1, s__Lactococcus cremoris, 95.0, 88.03, 0.8; GCF_014905395.1, s__Lactococcus taiwanensis, 95.0, 84.55, 0.5; GCF_004210295.1, s__Lactococcus sp004210295, 95.0, 81.4, 0.53; GCF_003627095.1, s__Lactococcus allomyrinae, 95.0, 79.74, 0.47; GCF_006965445.1, s__Lactococcus sp006965445, 95.0, 79.64, 0.45; GCF_016027715.1, s__Lactococcus garvieae_A, 95.0, 79.25, 0.21; GCF_018403745.1, s__La…	90.75	11	N/A	N/A
C8A_bin.2	d__Bacteria;p__Firmicutes;c__Bacilli;o__Lactobacillales;f__Streptococcaceae;g__Lactococcus;s__Lactococcus lactis	GCF_900099625.1	95	d__Bacteria;p__Firmicutes;c__Bacilli;o__Lactobacillales;f__Streptococcaceae;g__Lactococcus;s__Lactococcus lactis	99.27	0.99	GCF_900099625.1	95	d__Bacteria;p__Firmicutes;c__Bacilli;o__Lactobacillales;f__Streptococcaceae;g__Lactococcus;s__Lactococcus lactis	99.27	0.99	d__Bacteria;p__Firmicutes;c__Bacilli;o__Lactobacillales;f__Streptococcaceae;g__Lactococcus;s__	taxonomic classification defined by topology and ANI	topological placement and ANI have congruent species assignments	GCF_001591705.1, s__Lactococcus cremoris, 95.0, 87.9, 0.86; GCF_014905395.1, s__Lactococcus taiwanensis, 95.0, 84.88, 0.55; GCF_004210295.1, s__Lactococcus sp004210295, 95.0, 81.29, 0.57; GCF_003627095.1, s__Lactococcus allomyrinae, 95.0, 79.44, 0.52; GCF_006965445.1, s__Lactococcus sp006965445, 95.0, 79.25, 0.52; GCF_009601015.1, s__Lactococcus hircilactis, 95.0, 79.01, 0.26; GCF_016027715.1, s_…	96.7	11	N/A	N/A
C8B_bin.6	d__Bacteria;p__Firmicutes;c__Bacilli;o__Lactobacillales;f__Streptococcaceae;g__Lactococcus;s__Lactococcus lactis	GCF_900099625.1	95	d__Bacteria;p__Firmicutes;c__Bacilli;o__Lactobacillales;f__Streptococcaceae;g__Lactococcus;s__Lactococcus lactis	99.27	0.98	GCF_900099625.1	95	d__Bacteria;p__Firmicutes;c__Bacilli;o__Lactobacillales;f__Streptococcaceae;g__Lactococcus;s__Lactococcus lactis	99.27	0.98	d__Bacteria;p__Firmicutes;c__Bacilli;o__Lactobacillales;f__Streptococcaceae;g__Lactococcus;s__	taxonomic classification defined by topology and ANI	topological placement and ANI have congruent species assignments	GCF_001591705.1, s__Lactococcus cremoris, 95.0, 87.99, 0.87; GCF_014905395.1, s__Lactococcus taiwanensis, 95.0, 84.72, 0.54; GCF_004210295.1, s__Lactococcus sp004210295, 95.0, 81.3, 0.56; GCF_003627095.1, s__Lactococcus allomyrinae, 95.0, 79.47, 0.5; GCF_006965445.1, s__Lactococcus sp006965445, 95.0, 79.3, 0.51; GCF_009601015.1, s__Lactococcus hircilactis, 95.0, 78.85, 0.25; GCF_016027715.1, s__L…	92.95	11	N/A	N/A
C8C_bin.3	d__Bacteria;p__Firmicutes;c__Bacilli;o__Lactobacillales;f__Streptococcaceae;g__Lactococcus;s__Lactococcus lactis	GCF_900099625.1	95	d__Bacteria;p__Firmicutes;c__Bacilli;o__Lactobacillales;f__Streptococcaceae;g__Lactococcus;s__Lactococcus lactis	99.33	0.98	GCF_900099625.1	95	d__Bacteria;p__Firmicutes;c__Bacilli;o__Lactobacillales;f__Streptococcaceae;g__Lactococcus;s__Lactococcus lactis	99.33	0.98	d__Bacteria;p__Firmicutes;c__Bacilli;o__Lactobacillales;f__Streptococcaceae;g__Lactococcus;s__	taxonomic classification defined by topology and ANI	topological placement and ANI have congruent species assignments	GCF_001591705.1, s__Lactococcus cremoris, 95.0, 87.92, 0.88; GCF_014905395.1, s__Lactococcus taiwanensis, 95.0, 84.51, 0.56; GCF_004210295.1, s__Lactococcus sp004210295, 95.0, 81.02, 0.59; GCF_003627095.1, s__Lactococcus allomyrinae, 95.0, 79.19, 0.53; GCF_006965445.1, s__Lactococcus sp006965445, 95.0, 79.14, 0.53; GCF_016027715.1, s__Lactococcus garvieae_A, 95.0, 78.66, 0.24; GCF_018403745.1, s_…	77.01	11	N/A	N/A
C2B_bin.3	d__Bacteria;p__Firmicutes;c__Bacilli;o__Paenibacillales;f__Paenibacillaceae;g__Paenibacillus_J;s__Paenibacillus nuruki	GCF_001721045.1	95	d__Bacteria;p__Firmicutes;c__Bacilli;o__Paenibacillales;f__Paenibacillaceae;g__Paenibacillus_J;s__Paenibacillus nuruki	99.05	1	GCF_001721045.1	95	d__Bacteria;p__Firmicutes;c__Bacilli;o__Paenibacillales;f__Paenibacillaceae;g__Paenibacillus_J;s__Paenibacillus_J nuruki	99.05	1	d__Bacteria;p__Firmicutes;c__Bacilli;o__Paenibacillales;f__Paenibacillaceae;g__Paenibacillus_J;s__	taxonomic classification defined by topology and ANI	topological placement and ANI have congruent species assignments	GCF_016908805.1, s__Paenibacillus_J nicotianae, 95.0, 88.67, 0.98; GCF_000971985.1, s__Paenibacillus_J dauci, 95.0, 79.16, 0.31; GCF_001421015.2, s__Paenibacillus_J bovis, 95.0, 78.91, 0.32; GCF_000971965.1, s__Paenibacillus_J wulumuqiensis, 95.0, 78.7, 0.3; GCF_014645615.1, s__Paenibacillus_J hunanensis, 95.0, 78.69, 0.28	68.88	11	N/A	N/A
C2C_bin.6	d__Bacteria;p__Firmicutes;c__Bacilli;o__Paenibacillales;f__Paenibacillaceae;g__Paenibacillus_J;s__Paenibacillus nuruki	GCF_001721045.1	95	d__Bacteria;p__Firmicutes;c__Bacilli;o__Paenibacillales;f__Paenibacillaceae;g__Paenibacillus_J;s__Paenibacillus nuruki	98.89	1	GCF_001721045.1	95	d__Bacteria;p__Firmicutes;c__Bacilli;o__Paenibacillales;f__Paenibacillaceae;g__Paenibacillus_J;s__Paenibacillus_J nuruki	98.89	1	d__Bacteria;p__Firmicutes;c__Bacilli;o__Paenibacillales;f__Paenibacillaceae;g__Paenibacillus_J;s__	taxonomic classification defined by topology and ANI	topological placement and ANI have congruent species assignments	GCF_016908805.1, s__Paenibacillus_J nicotianae, 95.0, 88.97, 0.98; GCF_001421015.2, s__Paenibacillus_J bovis, 95.0, 78.77, 0.33; GCF_000971985.1, s__Paenibacillus_J dauci, 95.0, 78.72, 0.35; GCF_000971965.1, s__Paenibacillus_J wulumuqiensis, 95.0, 78.53, 0.31; GCF_014645615.1, s__Paenibacillus_J hunanensis, 95.0, 78.1, 0.3	63.34	11	N/A	N/A
T0A_bin.4	d__Bacteria;p__Firmicutes;c__Bacilli;o__Paenibacillales;f__Paenibacillaceae;g__Paenibacillus_J;s__Paenibacillus nuruki	GCF_001721045.1	95	d__Bacteria;p__Firmicutes;c__Bacilli;o__Paenibacillales;f__Paenibacillaceae;g__Paenibacillus_J;s__Paenibacillus nuruki	99	0.99	GCF_001721045.1	95	d__Bacteria;p__Firmicutes;c__Bacilli;o__Paenibacillales;f__Paenibacillaceae;g__Paenibacillus_J;s__Paenibacillus_J nuruki	99	0.99	d__Bacteria;p__Firmicutes;c__Bacilli;o__Paenibacillales;f__Paenibacillaceae;g__Paenibacillus_J;s__	taxonomic classification defined by topology and ANI	topological placement and ANI have congruent species assignments	GCF_016908805.1, s__Paenibacillus_J nicotianae, 95.0, 88.85, 0.97; GCF_000971985.1, s__Paenibacillus_J dauci, 95.0, 78.95, 0.32; GCF_000971965.1, s__Paenibacillus_J wulumuqiensis, 95.0, 78.55, 0.3; GCF_001421015.2, s__Paenibacillus_J bovis, 95.0, 78.53, 0.32; GCF_014645615.1, s__Paenibacillus_J hunanensis, 95.0, 78.07, 0.3	78.75	11	N/A	N/A
T0B_bin.1	d__Bacteria;p__Firmicutes;c__Bacilli;o__Paenibacillales;f__Paenibacillaceae;g__Paenibacillus_J;s__Paenibacillus nuruki	GCF_001721045.1	95	d__Bacteria;p__Firmicutes;c__Bacilli;o__Paenibacillales;f__Paenibacillaceae;g__Paenibacillus_J;s__Paenibacillus nuruki	98.98	0.99	GCF_001721045.1	95	d__Bacteria;p__Firmicutes;c__Bacilli;o__Paenibacillales;f__Paenibacillaceae;g__Paenibacillus_J;s__Paenibacillus_J nuruki	98.98	0.99	d__Bacteria;p__Firmicutes;c__Bacilli;o__Paenibacillales;f__Paenibacillaceae;g__Paenibacillus_J;s__	taxonomic classification defined by topology and ANI	topological placement and ANI have congruent species assignments	GCF_016908805.1, s__Paenibacillus_J nicotianae, 95.0, 88.53, 0.96; GCF_000971985.1, s__Paenibacillus_J dauci, 95.0, 78.15, 0.3; GCF_000971965.1, s__Paenibacillus_J wulumuqiensis, 95.0, 78.04, 0.27; GCF_001421015.2, s__Paenibacillus_J bovis, 95.0, 78.01, 0.31; GCF_014645615.1, s__Paenibacillus_J hunanensis, 95.0, 77.44, 0.25	62.13	11	N/A	N/A
T0C_bin.2	d__Bacteria;p__Firmicutes;c__Bacilli;o__Paenibacillales;f__Paenibacillaceae;g__Paenibacillus_J;s__Paenibacillus nuruki	GCF_001721045.1	95	d__Bacteria;p__Firmicutes;c__Bacilli;o__Paenibacillales;f__Paenibacillaceae;g__Paenibacillus_J;s__Paenibacillus nuruki	98.95	1	GCF_001721045.1	95	d__Bacteria;p__Firmicutes;c__Bacilli;o__Paenibacillales;f__Paenibacillaceae;g__Paenibacillus_J;s__Paenibacillus_J nuruki	98.95	1	d__Bacteria;p__Firmicutes;c__Bacilli;o__Paenibacillales;f__Paenibacillaceae;g__Paenibacillus_J;s__	taxonomic classification defined by topology and ANI	topological placement and ANI have congruent species assignments	GCF_016908805.1, s__Paenibacillus_J nicotianae, 95.0, 88.9, 0.97; GCF_001421015.2, s__Paenibacillus_J bovis, 95.0, 78.8, 0.34; GCF_000971985.1, s__Paenibacillus_J dauci, 95.0, 78.8, 0.36; GCF_000971965.1, s__Paenibacillus_J wulumuqiensis, 95.0, 78.32, 0.35; GCF_014645615.1, s__Paenibacillus_J hunanensis, 95.0, 78.16, 0.32	78.63	11	N/A	N/A
C15A_bin.4	d__Bacteria;p__Proteobacteria;c__Gammaproteobacteria;o__Enterobacterales;f__Enterobacteriaceae;g__Pantoea;s__Pantoea agglomerans	GCF_001598475.1	95	d__Bacteria;p__Proteobacteria;c__Gammaproteobacteria;o__Enterobacterales;f__Enterobacteriaceae;g__Pantoea;s__Pantoea agglomerans	99.06	0.93	GCF_001598475.1	95	d__Bacteria;p__Proteobacteria;c__Gammaproteobacteria;o__Enterobacterales;f__Enterobacteriaceae;g__Pantoea;s__Pantoea agglomerans	99.06	0.93	d__Bacteria;p__Proteobacteria;c__Gammaproteobacteria;o__Enterobacterales;f__Enterobacteriaceae;g__Pantoea;s__	taxonomic classification defined by topology and ANI	topological placement and ANI have congruent species assignments	GCF_900115075.1, s__Pantoea sp900115075, 95.0, 93.74, 0.93; GCF_004792415.1, s__Pantoea vagans, 95.0, 93.13, 0.93; GCF_013415305.1, s__Pantoea sp002419935, 95.0, 93.05, 0.91; GCF_009905795.1, s__Pantoea sp003512445, 95.0, 93.04, 0.93; GCF_009646115.1, s__Pantoea eucalypti, 95.0, 92.52, 0.91; GCF_008632075.1, s__Pantoea sp008632075, 95.0, 92.36, 0.93; GCF_006494375.1, s__Pantoea anthophila, 95.0, …	70.97	11	N/A	N/A
C2A_bin.3	d__Bacteria;p__Proteobacteria;c__Gammaproteobacteria;o__Enterobacterales;f__Enterobacteriaceae;g__Pantoea;s__Pantoea agglomerans	GCF_001598475.1	95	d__Bacteria;p__Proteobacteria;c__Gammaproteobacteria;o__Enterobacterales;f__Enterobacteriaceae;g__Pantoea;s__Pantoea agglomerans	99.24	0.92	GCF_001598475.1	95	d__Bacteria;p__Proteobacteria;c__Gammaproteobacteria;o__Enterobacterales;f__Enterobacteriaceae;g__Pantoea;s__Pantoea agglomerans	99.24	0.92	d__Bacteria;p__Proteobacteria;c__Gammaproteobacteria;o__Enterobacterales;f__Enterobacteriaceae;g__Pantoea;s__	taxonomic classification defined by topology and ANI	topological placement and ANI have congruent species assignments	GCF_900115075.1, s__Pantoea sp900115075, 95.0, 93.72, 0.92; GCF_013415305.1, s__Pantoea sp002419935, 95.0, 93.05, 0.92; GCF_004792415.1, s__Pantoea vagans, 95.0, 93.02, 0.92; GCF_009905795.1, s__Pantoea sp003512445, 95.0, 92.82, 0.9; GCF_009646115.1, s__Pantoea eucalypti, 95.0, 92.63, 0.92; GCF_008632075.1, s__Pantoea sp008632075, 95.0, 92.34, 0.9; GCF_006494375.1, s__Pantoea anthophila, 95.0, 90…	68.39	11	N/A	N/A
C2C_bin.4	d__Bacteria;p__Proteobacteria;c__Gammaproteobacteria;o__Enterobacterales;f__Enterobacteriaceae;g__Pantoea;s__Pantoea agglomerans	GCF_001598475.1	95	d__Bacteria;p__Proteobacteria;c__Gammaproteobacteria;o__Enterobacterales;f__Enterobacteriaceae;g__Pantoea;s__Pantoea agglomerans	99.22	0.98	GCF_001598475.1	95	d__Bacteria;p__Proteobacteria;c__Gammaproteobacteria;o__Enterobacterales;f__Enterobacteriaceae;g__Pantoea;s__Pantoea agglomerans	99.22	0.98	d__Bacteria;p__Proteobacteria;c__Gammaproteobacteria;o__Enterobacterales;f__Enterobacteriaceae;g__Pantoea;s__	taxonomic classification defined by topology and ANI	topological placement and ANI have congruent species assignments	GCF_900115075.1, s__Pantoea sp900115075, 95.0, 93.45, 0.98; GCF_009905795.1, s__Pantoea sp003512445, 95.0, 92.73, 0.97; GCF_004792415.1, s__Pantoea vagans, 95.0, 92.64, 0.99; GCF_013415305.1, s__Pantoea sp002419935, 95.0, 92.57, 0.97; GCF_008632075.1, s__Pantoea sp008632075, 95.0, 92.15, 0.97; GCF_009646115.1, s__Pantoea eucalypti, 95.0, 92.03, 0.97; GCF_006494375.1, s__Pantoea anthophila, 95.0, …	60.07	11	N/A	N/A
C40B_bin.5	d__Bacteria;p__Proteobacteria;c__Gammaproteobacteria;o__Enterobacterales;f__Enterobacteriaceae;g__Pantoea;s__Pantoea agglomerans	GCF_001598475.1	95	d__Bacteria;p__Proteobacteria;c__Gammaproteobacteria;o__Enterobacterales;f__Enterobacteriaceae;g__Pantoea;s__Pantoea agglomerans	98.44	0.91	GCF_001598475.1	95	d__Bacteria;p__Proteobacteria;c__Gammaproteobacteria;o__Enterobacterales;f__Enterobacteriaceae;g__Pantoea;s__Pantoea agglomerans	98.44	0.91	d__Bacteria;p__Proteobacteria;c__Gammaproteobacteria;o__Enterobacterales;f__Enterobacteriaceae;g__Pantoea;s__	taxonomic classification defined by topology and ANI	topological placement and ANI have congruent species assignments	GCF_900115075.1, s__Pantoea sp900115075, 95.0, 93.17, 0.89; GCF_009905795.1, s__Pantoea sp003512445, 95.0, 92.38, 0.85; GCF_004792415.1, s__Pantoea vagans, 95.0, 92.37, 0.87; GCF_013415305.1, s__Pantoea sp002419935, 95.0, 92.2, 0.86; GCF_008632075.1, s__Pantoea sp008632075, 95.0, 92.03, 0.83; GCF_009646115.1, s__Pantoea eucalypti, 95.0, 92.01, 0.86; GCF_006494375.1, s__Pantoea anthophila, 95.0, 8…	52.86	11	N/A	N/A
C4A_bin.4	d__Bacteria;p__Proteobacteria;c__Gammaproteobacteria;o__Enterobacterales;f__Enterobacteriaceae;g__Pantoea;s__Pantoea agglomerans	GCF_001598475.1	95	d__Bacteria;p__Proteobacteria;c__Gammaproteobacteria;o__Enterobacterales;f__Enterobacteriaceae;g__Pantoea;s__Pantoea agglomerans	99.25	0.97	GCF_001598475.1	95	d__Bacteria;p__Proteobacteria;c__Gammaproteobacteria;o__Enterobacterales;f__Enterobacteriaceae;g__Pantoea;s__Pantoea agglomerans	99.25	0.97	d__Bacteria;p__Proteobacteria;c__Gammaproteobacteria;o__Enterobacterales;f__Enterobacteriaceae;g__Pantoea;s__	taxonomic classification defined by topology and ANI	topological placement and ANI have congruent species assignments	GCF_900115075.1, s__Pantoea sp900115075, 95.0, 93.64, 0.97; GCF_009905795.1, s__Pantoea sp003512445, 95.0, 93.1, 0.96; GCF_004792415.1, s__Pantoea vagans, 95.0, 92.93, 0.97; GCF_013415305.1, s__Pantoea sp002419935, 95.0, 92.65, 0.97; GCF_009646115.1, s__Pantoea eucalypti, 95.0, 92.33, 0.96; GCF_008632075.1, s__Pantoea sp008632075, 95.0, 92.24, 0.97; GCF_006494375.1, s__Pantoea anthophila, 95.0, 9…	73.53	11	N/A	N/A
C4B_bin.3	d__Bacteria;p__Proteobacteria;c__Gammaproteobacteria;o__Enterobacterales;f__Enterobacteriaceae;g__Pantoea;s__Pantoea agglomerans	GCF_001598475.1	95	d__Bacteria;p__Proteobacteria;c__Gammaproteobacteria;o__Enterobacterales;f__Enterobacteriaceae;g__Pantoea;s__Pantoea agglomerans	99.17	0.96	GCF_001598475.1	95	d__Bacteria;p__Proteobacteria;c__Gammaproteobacteria;o__Enterobacterales;f__Enterobacteriaceae;g__Pantoea;s__Pantoea agglomerans	99.17	0.96	d__Bacteria;p__Proteobacteria;c__Gammaproteobacteria;o__Enterobacterales;f__Enterobacteriaceae;g__Pantoea;s__	taxonomic classification defined by topology and ANI	topological placement and ANI have congruent species assignments	GCF_900115075.1, s__Pantoea sp900115075, 95.0, 93.43, 0.96; GCF_004792415.1, s__Pantoea vagans, 95.0, 92.66, 0.96; GCF_009905795.1, s__Pantoea sp003512445, 95.0, 92.56, 0.93; GCF_013415305.1, s__Pantoea sp002419935, 95.0, 92.37, 0.95; GCF_009646115.1, s__Pantoea eucalypti, 95.0, 92.02, 0.94; GCF_008632075.1, s__Pantoea sp008632075, 95.0, 92.0, 0.94; GCF_006494375.1, s__Pantoea anthophila, 95.0, 9…	81.73	11	N/A	N/A
C4C_bin.7	d__Bacteria;p__Proteobacteria;c__Gammaproteobacteria;o__Enterobacterales;f__Enterobacteriaceae;g__Pantoea;s__Pantoea agglomerans	GCF_001598475.1	95	d__Bacteria;p__Proteobacteria;c__Gammaproteobacteria;o__Enterobacterales;f__Enterobacteriaceae;g__Pantoea;s__Pantoea agglomerans	99.14	0.96	GCF_001598475.1	95	d__Bacteria;p__Proteobacteria;c__Gammaproteobacteria;o__Enterobacterales;f__Enterobacteriaceae;g__Pantoea;s__Pantoea agglomerans	99.14	0.96	d__Bacteria;p__Proteobacteria;c__Gammaproteobacteria;o__Enterobacterales;f__Enterobacteriaceae;g__Pantoea;s__	taxonomic classification defined by topology and ANI	topological placement and ANI have congruent species assignments	GCF_900115075.1, s__Pantoea sp900115075, 95.0, 93.53, 0.96; GCF_004792415.1, s__Pantoea vagans, 95.0, 92.79, 0.95; GCF_009905795.1, s__Pantoea sp003512445, 95.0, 92.64, 0.95; GCF_013415305.1, s__Pantoea sp002419935, 95.0, 92.58, 0.95; GCF_008632075.1, s__Pantoea sp008632075, 95.0, 92.01, 0.95; GCF_009646115.1, s__Pantoea eucalypti, 95.0, 92.01, 0.97; GCF_006494375.1, s__Pantoea anthophila, 95.0, …	63.19	11	N/A	N/A
C8B_bin.5	d__Bacteria;p__Proteobacteria;c__Gammaproteobacteria;o__Enterobacterales;f__Enterobacteriaceae;g__Pantoea;s__Pantoea agglomerans	GCF_001598475.1	95	d__Bacteria;p__Proteobacteria;c__Gammaproteobacteria;o__Enterobacterales;f__Enterobacteriaceae;g__Pantoea;s__Pantoea agglomerans	99.18	0.95	GCF_001598475.1	95	d__Bacteria;p__Proteobacteria;c__Gammaproteobacteria;o__Enterobacterales;f__Enterobacteriaceae;g__Pantoea;s__Pantoea agglomerans	99.18	0.95	d__Bacteria;p__Proteobacteria;c__Gammaproteobacteria;o__Enterobacterales;f__Enterobacteriaceae;g__Pantoea;s__	taxonomic classification defined by topology and ANI	topological placement and ANI have congruent species assignments	GCF_900115075.1, s__Pantoea sp900115075, 95.0, 93.66, 0.94; GCF_004792415.1, s__Pantoea vagans, 95.0, 92.61, 0.95; GCF_009905795.1, s__Pantoea sp003512445, 95.0, 92.61, 0.94; GCF_013415305.1, s__Pantoea sp002419935, 95.0, 92.51, 0.94; GCF_008632075.1, s__Pantoea sp008632075, 95.0, 92.04, 0.93; GCF_009646115.1, s__Pantoea eucalypti, 95.0, 92.04, 0.92; GCF_006494375.1, s__Pantoea anthophila, 95.0, …	76.79	11	N/A	N/A
T0A_bin.2	d__Bacteria;p__Proteobacteria;c__Gammaproteobacteria;o__Enterobacterales;f__Enterobacteriaceae;g__Pantoea;s__Pantoea agglomerans	GCF_001598475.1	95	d__Bacteria;p__Proteobacteria;c__Gammaproteobacteria;o__Enterobacterales;f__Enterobacteriaceae;g__Pantoea;s__Pantoea agglomerans	99.16	0.98	GCF_001598475.1	95	d__Bacteria;p__Proteobacteria;c__Gammaproteobacteria;o__Enterobacterales;f__Enterobacteriaceae;g__Pantoea;s__Pantoea agglomerans	99.16	0.98	d__Bacteria;p__Proteobacteria;c__Gammaproteobacteria;o__Enterobacterales;f__Enterobacteriaceae;g__Pantoea;s__	taxonomic classification defined by topology and ANI	topological placement and ANI have congruent species assignments	GCF_900115075.1, s__Pantoea sp900115075, 95.0, 92.95, 0.96; GCF_009905795.1, s__Pantoea sp003512445, 95.0, 92.2, 0.94; GCF_004792415.1, s__Pantoea vagans, 95.0, 92.02, 0.98; GCF_013415305.1, s__Pantoea sp002419935, 95.0, 91.88, 0.97; GCF_008632075.1, s__Pantoea sp008632075, 95.0, 91.53, 0.94; GCF_009646115.1, s__Pantoea eucalypti, 95.0, 91.35, 0.96; GCF_006494375.1, s__Pantoea anthophila, 95.0, 8…	73.89	11	N/A	N/A
T0B_bin.2	d__Bacteria;p__Proteobacteria;c__Gammaproteobacteria;o__Enterobacterales;f__Enterobacteriaceae;g__Pantoea;s__Pantoea agglomerans	GCF_001598475.1	95	d__Bacteria;p__Proteobacteria;c__Gammaproteobacteria;o__Enterobacterales;f__Enterobacteriaceae;g__Pantoea;s__Pantoea agglomerans	99.15	0.96	GCF_001598475.1	95	d__Bacteria;p__Proteobacteria;c__Gammaproteobacteria;o__Enterobacterales;f__Enterobacteriaceae;g__Pantoea;s__Pantoea agglomerans	99.15	0.96	d__Bacteria;p__Proteobacteria;c__Gammaproteobacteria;o__Enterobacterales;f__Enterobacteriaceae;g__Pantoea;s__	taxonomic classification defined by topology and ANI	topological placement and ANI have congruent species assignments	GCF_900115075.1, s__Pantoea sp900115075, 95.0, 92.89, 0.94; GCF_009905795.1, s__Pantoea sp003512445, 95.0, 92.13, 0.93; GCF_004792415.1, s__Pantoea vagans, 95.0, 91.96, 0.95; GCF_013415305.1, s__Pantoea sp002419935, 95.0, 91.83, 0.94; GCF_008632075.1, s__Pantoea sp008632075, 95.0, 91.39, 0.93; GCF_009646115.1, s__Pantoea eucalypti, 95.0, 91.26, 0.93; GCF_006494375.1, s__Pantoea anthophila, 95.0, …	67.61	11	N/A	N/A
T0C_bin.4	d__Bacteria;p__Proteobacteria;c__Gammaproteobacteria;o__Enterobacterales;f__Enterobacteriaceae;g__Pantoea;s__Pantoea agglomerans	GCF_001598475.1	95	d__Bacteria;p__Proteobacteria;c__Gammaproteobacteria;o__Enterobacterales;f__Enterobacteriaceae;g__Pantoea;s__Pantoea agglomerans	99.15	0.95	GCF_001598475.1	95	d__Bacteria;p__Proteobacteria;c__Gammaproteobacteria;o__Enterobacterales;f__Enterobacteriaceae;g__Pantoea;s__Pantoea agglomerans	99.15	0.95	d__Bacteria;p__Proteobacteria;c__Gammaproteobacteria;o__Enterobacterales;f__Enterobacteriaceae;g__Pantoea;s__	taxonomic classification defined by topology and ANI	topological placement and ANI have congruent species assignments	GCF_900115075.1, s__Pantoea sp900115075, 95.0, 93.12, 0.94; GCF_009905795.1, s__Pantoea sp003512445, 95.0, 92.18, 0.92; GCF_004792415.1, s__Pantoea vagans, 95.0, 92.12, 0.94; GCF_013415305.1, s__Pantoea sp002419935, 95.0, 92.01, 0.94; GCF_008632075.1, s__Pantoea sp008632075, 95.0, 91.6, 0.92; GCF_009646115.1, s__Pantoea eucalypti, 95.0, 91.41, 0.93; GCF_006494375.1, s__Pantoea anthophila, 95.0, 8…	70.75	11	N/A	N/A
T0A_bin.3	d__Bacteria;p__Proteobacteria;c__Gammaproteobacteria;o__Enterobacterales;f__Enterobacteriaceae;g__Pantoea;s__Pantoea ananatis	GCF_000710035.2	95	d__Bacteria;p__Proteobacteria;c__Gammaproteobacteria;o__Enterobacterales;f__Enterobacteriaceae;g__Pantoea;s__Pantoea ananatis	98.91	0.94	GCF_000710035.2	95	d__Bacteria;p__Proteobacteria;c__Gammaproteobacteria;o__Enterobacterales;f__Enterobacteriaceae;g__Pantoea;s__Pantoea ananatis	98.91	0.94	d__Bacteria;p__Proteobacteria;c__Gammaproteobacteria;o__Enterobacterales;f__Enterobacteriaceae;g__Pantoea;s__	taxonomic classification defined by topology and ANI	topological placement and ANI have congruent species assignments	GCF_002307475.1, s__Pantoea allii, 95.0, 88.96, 0.88; GCF_008801695.1, s__Pantoea stewartii, 95.0, 85.19, 0.72; GCA_002095305.1, s__Pantoea brenneri, 95.0, 81.47, 0.56; GCA_002434205.1, s__Pantoea sp002434205, 95.0, 81.39, 0.57; GCF_002095315.1, s__Pantoea conspicua, 95.0, 81.32, 0.56; GCF_001598475.1, s__Pantoea agglomerans, 95.0, 81.28, 0.58; GCF_009646115.1, s__Pantoea eucalypti, 95.0, 81.28, …	86.28	11	N/A	N/A
T0B_bin.3	d__Bacteria;p__Proteobacteria;c__Gammaproteobacteria;o__Enterobacterales;f__Enterobacteriaceae;g__Pantoea;s__Pantoea ananatis	GCF_000710035.2	95	d__Bacteria;p__Proteobacteria;c__Gammaproteobacteria;o__Enterobacterales;f__Enterobacteriaceae;g__Pantoea;s__Pantoea ananatis	99.06	0.97	GCF_000710035.2	95	d__Bacteria;p__Proteobacteria;c__Gammaproteobacteria;o__Enterobacterales;f__Enterobacteriaceae;g__Pantoea;s__Pantoea ananatis	99.06	0.97	d__Bacteria;p__Proteobacteria;c__Gammaproteobacteria;o__Enterobacterales;f__Enterobacteriaceae;g__Pantoea;s__	taxonomic classification defined by topology and ANI	topological placement and ANI have congruent species assignments	GCF_002307475.1, s__Pantoea allii, 95.0, 88.97, 0.92; GCF_008801695.1, s__Pantoea stewartii, 95.0, 85.12, 0.74; GCF_002095315.1, s__Pantoea conspicua, 95.0, 81.42, 0.56; GCF_001598475.1, s__Pantoea agglomerans, 95.0, 81.4, 0.59; GCA_002095305.1, s__Pantoea brenneri, 95.0, 81.35, 0.58; GCA_002434205.1, s__Pantoea sp002434205, 95.0, 81.34, 0.6; GCF_900115075.1, s__Pantoea sp900115075, 95.0, 81.18, …	79.23	11	N/A	N/A
T0C_bin.3	d__Bacteria;p__Proteobacteria;c__Gammaproteobacteria;o__Enterobacterales;f__Enterobacteriaceae;g__Pantoea;s__Pantoea ananatis	GCF_000710035.2	95	d__Bacteria;p__Proteobacteria;c__Gammaproteobacteria;o__Enterobacterales;f__Enterobacteriaceae;g__Pantoea;s__Pantoea ananatis	99.09	0.98	GCF_000710035.2	95	d__Bacteria;p__Proteobacteria;c__Gammaproteobacteria;o__Enterobacterales;f__Enterobacteriaceae;g__Pantoea;s__Pantoea ananatis	99.09	0.98	d__Bacteria;p__Proteobacteria;c__Gammaproteobacteria;o__Enterobacterales;f__Enterobacteriaceae;g__Pantoea;s__	taxonomic classification defined by topology and ANI	topological placement and ANI have congruent species assignments	GCF_002307475.1, s__Pantoea allii, 95.0, 89.05, 0.92; GCF_008801695.1, s__Pantoea stewartii, 95.0, 85.09, 0.78; GCA_002434205.1, s__Pantoea sp002434205, 95.0, 81.44, 0.61; GCF_002095315.1, s__Pantoea conspicua, 95.0, 81.4, 0.58; GCA_002095305.1, s__Pantoea brenneri, 95.0, 81.34, 0.62; GCA_009830035.1, s__Pantoea sp009830035, 95.0, 81.23, 0.53; GCF_004792415.1, s__Pantoea vagans, 95.0, 81.22, 0.62…	76.09	11	N/A	N/A
T0A_bin.1	d__Bacteria;p__Proteobacteria;c__Gammaproteobacteria;o__Enterobacterales;f__Enterobacteriaceae;g__Rosenbergiella;s__Rosenbergiella epipactidis	GCF_018494055.1	95	d__Bacteria;p__Proteobacteria;c__Gammaproteobacteria;o__Enterobacterales;f__Enterobacteriaceae;g__Rosenbergiella;s__Rosenbergiella epipactidis	99.07	0.95	GCF_018494055.1	95	d__Bacteria;p__Proteobacteria;c__Gammaproteobacteria;o__Enterobacterales;f__Enterobacteriaceae;g__Rosenbergiella;s__Rosenbergiella epipactidis	99.07	0.95	d__Bacteria;p__Proteobacteria;c__Gammaproteobacteria;o__Enterobacterales;f__Enterobacteriaceae;g__Rosenbergiella;s__	taxonomic classification defined by topology and ANI	topological placement and ANI have congruent species assignments	GCF_900111105.1, s__Rosenbergiella nectarea, 95.0, 87.65, 0.89; GCF_018494065.1, s__Rosenbergiella sp018494065, 95.0, 84.73, 0.8; GCF_018494085.1, s__Rosenbergiella collisarenosi, 95.0, 82.01, 0.66; GCF_018494035.1, s__Rosenbergiella australiborealis, 95.0, 81.37, 0.57	77.12	11	N/A	N/A
T0B_bin.4	d__Bacteria;p__Proteobacteria;c__Gammaproteobacteria;o__Enterobacterales;f__Enterobacteriaceae;g__Rosenbergiella;s__Rosenbergiella epipactidis	GCF_018494055.1	95	d__Bacteria;p__Proteobacteria;c__Gammaproteobacteria;o__Enterobacterales;f__Enterobacteriaceae;g__Rosenbergiella;s__Rosenbergiella epipactidis	98.96	0.95	GCF_018494055.1	95	d__Bacteria;p__Proteobacteria;c__Gammaproteobacteria;o__Enterobacterales;f__Enterobacteriaceae;g__Rosenbergiella;s__Rosenbergiella epipactidis	98.96	0.95	d__Bacteria;p__Proteobacteria;c__Gammaproteobacteria;o__Enterobacterales;f__Enterobacteriaceae;g__Rosenbergiella;s__	taxonomic classification defined by topology and ANI	topological placement and ANI have congruent species assignments	GCF_900111105.1, s__Rosenbergiella nectarea, 95.0, 87.52, 0.85; GCF_018494065.1, s__Rosenbergiella sp018494065, 95.0, 84.31, 0.8; GCF_018494085.1, s__Rosenbergiella collisarenosi, 95.0, 81.55, 0.67; GCF_018494035.1, s__Rosenbergiella australiborealis, 95.0, 80.95, 0.57	63.09	11	N/A	N/A
T0C_bin.1	d__Bacteria;p__Proteobacteria;c__Gammaproteobacteria;o__Enterobacterales;f__Enterobacteriaceae;g__Rosenbergiella;s__Rosenbergiella epipactidis	GCF_018494055.1	95	d__Bacteria;p__Proteobacteria;c__Gammaproteobacteria;o__Enterobacterales;f__Enterobacteriaceae;g__Rosenbergiella;s__Rosenbergiella epipactidis	99.16	0.93	GCF_018494055.1	95	d__Bacteria;p__Proteobacteria;c__Gammaproteobacteria;o__Enterobacterales;f__Enterobacteriaceae;g__Rosenbergiella;s__Rosenbergiella epipactidis	99.16	0.93	d__Bacteria;p__Proteobacteria;c__Gammaproteobacteria;o__Enterobacterales;f__Enterobacteriaceae;g__Rosenbergiella;s__	taxonomic classification defined by topology and ANI	topological placement and ANI have congruent species assignments	GCF_900111105.1, s__Rosenbergiella nectarea, 95.0, 87.65, 0.86; GCF_018494065.1, s__Rosenbergiella sp018494065, 95.0, 84.75, 0.79; GCF_018494085.1, s__Rosenbergiella collisarenosi, 95.0, 81.99, 0.66; GCF_018494035.1, s__Rosenbergiella australiborealis, 95.0, 81.37, 0.55	74.17	11	N/A	N/A

## Sheet: Table S3
gene_id	gene_description	module	header	subheader	C15B_bin.6	C2A_bin.5	C2B_bin.4	C2C_bin.7	C40A_bin.1	C40A_bin.2	C40C_bin.5	C40C_bin.6	C40C_bin.8	C4B_bin.1	C4C_bin.3	C4C_bin.8	C8A_bin.2	C8A_bin.3	C8A_bin.6	T0B_bin.2	T0B_bin.3	T0B_bin.4	T0C_bin.2	sum
GH13	GH13 alpha-amylase (EC 3.2.1.1); pullulanase (EC 3.2.1.41); cyclomaltodextrin glucanotransferase (EC 2.4.1.19); cyclomaltodextrinase (EC 3.2.1.54); trehalose-6-phosphate hydrolase (EC 3.2.1.93); oligo-alpha-glucosidase (EC 3.2.1.10); maltogenic amylase (EC 3.2.1.133); neopullulanase (EC 3.2.1.135); alpha-glucosidase (EC 3.2.1.20); maltotetraose-forming alpha-amylase (EC 3.2.1.60); isoamylase (EC …	Glycoside Hydrolases	CAZY	Starch Backbone Cleavage	2	5	4	3	3	2	3	12	2	4	2	4	6	2	7	5	6	1	4	77
GH1	GH1 beta-glucosidase (EC 3.2.1.21); beta-galactosidase (EC 3.2.1.23); beta-mannosidase (EC 3.2.1.25); beta-glucuronidase (EC 3.2.1.31); beta-xylosidase (EC 3.2.1.37); beta-D-fucosidase (EC 3.2.1.38); phlorizin hydrolase (EC 3.2.1.62); exo-beta-1,4-glucanase (EC 3.2.1.74); 6-phospho-beta-galactosidase (EC 3.2.1.85); 6-phospho-beta-glucosidase (EC 3.2.1.86); strictosidine beta-glucosidase (EC 3.2.1…	Glycoside Hydrolases	CAZY	Amorphous Cellulose Oligo Cleavage, Mixed-Linkage glucans Oligo Cleavage (Hemicellulose), Beta-galactan (pectic galactan) Oligo Cleavage	1	4	5	3	0	0	0	9	2	3	0	6	6	6	4	1	5	1	1	57
GH73	GH73 lysozyme (EC 3.2.1.17); mannosyl-glycoprotein endo-beta-N-acetylglucosaminidase (EC 3.2.1.96); peptidoglycan hydrolase with endo-beta-N-acetylglucosaminidase specificity (EC 3.2.1.-)	Glycoside Hydrolases	CAZY	Chitin Backbone Cleavage	2	1	3	2	4	0	4	3	1	2	2	2	4	3	3	1	1	0	0	38
GH109	GH109 alpha-N-acetylgalactosaminidase (EC 3.2.1.49)	Glycoside Hydrolases	CAZY	Mucin Oligo Cleavage	0	0	1	0	0	5	5	2	0	1	0	2	1	0	1	2	3	2	2	27
GH43	GH43 beta-xylosidase (EC 3.2.1.37); alpha-L-arabinofuranosidase (EC 3.2.1.55); xylanase (EC 3.2.1.8); alpha-1,2-L-arabinofuranosidase (EC 3.2.1.-); exo-alpha-1,5-L-arabinofuranosidase (EC 3.2.1.-); [inverting] exo-alpha-1,5-L-arabinanase (EC 3.2.1.-); beta-1,3-xylosidase (EC 3.2.1.-); [inverting] exo-alpha-1,5-L-arabinanase (EC 3.2.1.-); [inverting] endo-alpha-1,5-L-arabinanase (EC 3.2.1.99); exo…	Glycoside Hydrolases	CAZY	Xyloglucan Oligo Cleavage (Hemicellulose), Arabinan Backbone Cleavage, Arabinan Oligo Cleavage	4	1	2	1	1	0	5	0	0	0	1	0	1	2	1	0	1	1	4	25
GH2	GH2 beta-galactosidase (EC 3.2.1.23) ; beta-mannosidase (EC 3.2.1.25); beta-glucuronidase (EC 3.2.1.31); alpha-L-arabinofuranosidase (EC 3.2.1.55); mannosylglycoprotein endo-beta-mannosidase (EC 3.2.1.152); exo-beta-glucosaminidase (EC 3.2.1.165); alpha-L-arabinopyranosidase (EC 3.2.1.-); beta-galacturonidase (EC 3.2.1.-); beta-xylosidase (EC 3.2.1.37); beta-D-galactofuranosidase (EC 3.2.1.146);	Glycoside Hydrolases	CAZY	Amorphous Cellulose Oligo Cleavage, Xyloglucan Oligo Cleavage (Hemicellulose), Beta-mannan Oligo Cleavage (Hemicellulose), Pectin Oligo Cleavage, Beta-galactan (pectic galactan) Oligo Cleavage, Arabinose Oligo cleavage	1	2	1	1	3	0	3	1	2	1	1	0	1	1	1	0	1	0	3	23
GH3	GH3 beta-glucosidase (EC 3.2.1.21); xylan 1,4-beta-xylosidase (EC 3.2.1.37); beta-glucosylceramidase (EC 3.2.1.45); beta-N-acetylhexosaminidase (EC 3.2.1.52); alpha-L-arabinofuranosidase (EC 3.2.1.55); glucan 1,3-beta-glucosidase (EC 3.2.1.58); glucan 1,4-beta-glucosidase (EC 3.2.1.74); isoprimeverose-producing oligoxyloglucan hydrolase (EC 3.2.1.120); coniferin beta-glucosidase (EC 3.2.1.126); e…	Glycoside Hydrolases	CAZY	Amorphous Cellulose Oligo Cleavage, Xylan Oligo Cleavage (Hemicellulose), Mixed-Linkage glucans Oligo Cleavage (Hemicellulose), Arabinan Oligo Cleavage, Chitin Oligo Cleavage	1	0	2	2	1	0	1	0	2	0	0	1	1	0	1	1	3	2	2	20
CE4	CE4 acetyl xylan esterase (EC 3.1.1.72); chitin deacetylase (EC 3.5.1.41); chitooligosaccharide deacetylase (EC 3.5.1.-); peptidoglycan GlcNAc deacetylase (EC 3.5.1.-); peptidoglycan N-acetylmuramic acid deacetylase (EC 3.5.1.-).	Carbohydrate Esterases	CAZY	Chitin Oligo Cleavage	2	0	0	0	2	4	2	1	0	0	2	0	2	0	0	0	1	1	2	19
GH23	GH23 lysozyme type G (EC 3.2.1.17); peptidoglycan lyase (EC 4.2.2.n1) also known in the literature as peptidoglycan lytic transglycosylase; chitinase (EC 3.2.1.14)	Glycoside Hydrolases	CAZY	Chitin Backbone Cleavage	0	0	0	0	0	2	0	0	0	0	0	0	0	0	0	5	5	5	0	17
GH31	GH31 alpha-glucosidase (EC 3.2.1.20); alpha-galactosidase (EC 3.2.1.22); alpha-mannosidase (EC 3.2.1.24); alpha-1,3-glucosidase (EC 3.2.1.84); sucrase-isomaltase (EC 3.2.1.48) (EC 3.2.1.10); alpha-xylosidase (EC 3.2.1.177); alpha-glucan lyase (EC 4.2.2.13); isomaltosyltransferase (EC 2.4.1.-); oligosaccharide alpha-1,4-glucosyltransferase (EC 2.4.1.161); sulfoquinovosidase (EC 3.2.1.-)	Glycoside Hydrolases	CAZY	Xyloglucan Oligo Cleavage (Hemicellulose), Xylan Oligo Cleavage (Hemicellulose), Alpha-galactans Oligo Cleavage, Alpha-galactans Oligo Cleavage, Mucin Oligo Cleavage	3	1	1	0	1	0	4	1	0	0	1	0	0	1	0	0	1	0	1	15
GH51	GH51 endoglucanase (EC 3.2.1.4); endo-beta-1,4-xylanase (EC 3.2.1.8); beta-xylosidase (EC 3.2.1.37); alpha-L-arabinofuranosidase (EC 3.2.1.55); lichenase / endo-beta-1,3-1,4-glucanase (EC 3.2.1.73)	Glycoside Hydrolases	CAZY	Arabinan Oligo Cleavage	2	2	0	1	2	0	4	0	0	0	1	0	0	0	0	0	1	0	1	14
AA1	AA1 Laccase / p-diphenol:oxygen oxidoreductase / ferroxidase (EC 1.10.3.2); ; ferroxidase (EC 1.10.3.-); Laccase-like multicopper oxidase (EC 1.10.3.-)	Auxiliary Activities	CAZY	Polyphenolics Cleavage	0	0	0	0	1	0	1	1	0	0	1	0	0	0	0	1	2	2	1	10
GH36	GH36 alpha-galactosidase (EC 3.2.1.22); alpha-N-acetylgalactosaminidase (EC 3.2.1.49); stachyose synthase (EC 2.4.1.67); raffinose synthase (EC 2.4.1.82)	Glycoside Hydrolases	CAZY	Alpha-galactans Oligo Cleavage, Mucin Oligo Cleavage	0	2	0	1	1	0	1	3	0	0	1	0	0	0	1	0	0	0	0	10
GH78	GH78 alpha-L-rhamnosidase (EC 3.2.1.40); rhamnogalacturonan alpha-L-rhamnohydrolase (EC 3.2.1.174); L-Rhap-alpha-1,3-D-Apif -specific alpha-1,3-L-rhamnosidase (EC 3.2.1.-)	Glycoside Hydrolases	CAZY	Pectin Oligo Cleavage, Rhamnose Oligo cleavage	0	0	0	1	4	0	2	2	0	0	0	1	0	0	0	0	0	0	0	10
GH8	GH8 chitosanase (EC 3.2.1.132); cellulase (EC 3.2.1.4); licheninase (EC 3.2.1.73); endo-1,4-beta-xylanase (EC 3.2.1.8); reducing-end-xylose releasing exo-oligoxylanase (EC 3.2.1.156)	Glycoside Hydrolases	CAZY	Amorphous Cellulose Backbone Cleavage, Xylan Backbone Cleavage (Hemicellulose), Mixed-Linkage glucans Backbone Cleavage (Hemicellulose)	0	0	2	4	0	0	0	0	0	1	1	0	0	0	0	1	1	0	0	10
AA4	AA4 vanillyl-alcohol oxidase (EC 1.1.3.38)	Auxiliary Activities	CAZY	Polyphenolics Cleavage	0	1	0	0	0	3	2	1	1	0	0	0	0	0	0	0	0	0	0	8
GH20	GH20 beta-hexosaminidase (EC 3.2.1.52); lacto-N-biosidase (EC 3.2.1.140); beta-1,6-N-acetylglucosaminidase (EC 3.2.1.-); beta-6-SO3-N-acetylglucosaminidase (EC 3.2.1.-)	Glycoside Hydrolases	CAZY	Chitin Oligo Cleavage	0	0	0	0	1	0	1	1	0	0	0	0	1	0	0	2	1	0	0	7
GH146	GH146 beta-L-arabinofuranosidase (EC 3.2.1.185)	Glycoside Hydrolases	CAZY	Arabinose Oligo cleavage	0	0	0	0	2	0	2	0	1	0	0	0	0	0	0	0	1	0	0	6
GH30	GH30 endo-beta-1,4-xylanase (EC 3.2.1.8); beta-glucosidase (3.2.1.21); beta-glucuronidase (EC 3.2.1.31); beta-xylosidase (EC 3.2.1.37); beta-fucosidase (EC 3.2.1.38); glucosylceramidase (EC 3.2.1.45); beta-1,6-glucanase (EC 3.2.1.75); glucuronoarabinoxylan endo-beta-1,4-xylanase (EC 3.2.1.136); endo-beta-1,6-galactanase (EC:3.2.1.164); [reducing end] beta-xylosidase (EC 3.2.1.-)	Glycoside Hydrolases	CAZY	Xylan Backbone Cleavage (Hemicellulose), Mixed-Linkage glucans Backbone Cleavage (Hemicellulose)	1	0	0	0	1	0	3	0	0	0	1	0	0	0	0	0	0	0	0	6
GH38	GH38 alpha-mannosidase (EC 3.2.1.24); mannosyl-oligosaccharide alpha-1,2-mannosidase (EC 3.2.1.113); mannosyl-oligosaccharide alpha-1,3-1,6-mannosidase (EC 3.2.1.114); alpha-2-O-mannosylglycerate hydrolase (EC 3.2.1.170); mannosyl-oligosaccharide alpha-1,3-mannosidase (EC 3.2.1.-)	Glycoside Hydrolases	CAZY	Alpha-mannan Oligo Cleavage (Hemicellulose)	0	0	0	0	0	0	0	1	0	0	0	3	1	0	0	0	1	0	0	6
GH127	GH127 beta-L-arabinofuranosidase (EC 3.2.1.185); 3-C-carboxy-5-deoxy-L-xylose (aceric acid) hydrolase (EC 3.2.1.-)	Glycoside Hydrolases	CAZY	Arabinose Oligo cleavage	0	0	0	0	2	0	1	0	1	0	0	0	0	0	0	0	1	0	0	5
GH4	GH4 maltose-6-phosphate glucosidase (EC 3.2.1.122); alpha-glucosidase (EC 3.2.1.20); alpha-galactosidase (EC 3.2.1.22); 6-phospho-beta-glucosidase (EC 3.2.1.86); alpha-glucuronidase (EC 3.2.1.139); alpha-galacturonase (EC 3.2.1.67); palatinase (EC 3.2.1.-)	Glycoside Hydrolases	CAZY	Pectin Oligo Cleavage, Alpha-galactans Oligo Cleavage	0	0	0	0	0	0	0	0	0	0	0	0	0	0	0	0	2	1	2	5
GH105	GH105 unsaturated rhamnogalacturonyl hydrolase (EC 3.2.1.172); d-4,5-unsaturated beta-glucuronyl hydrolase (EC 3.2.1.-); d-4,5-unsaturated alpha-galacturonidase (EC 3.2.1.-)	Glycoside Hydrolases	CAZY	Pectin Oligo Cleavage	1	0	0	0	0	0	0	0	0	0	0	1	0	0	0	1	1	0	0	4
GH120	GH120 beta-xylosidase (EC 3.2.1.37)	Glycoside Hydrolases	CAZY	Xylan Oligo Cleavage (Hemicellulose)	0	0	1	0	0	0	3	0	0	0	0	0	0	0	0	0	0	0	0	4
GH15	GH15 glucoamylase (EC 3.2.1.3); glucodextranase (EC 3.2.1.70); alpha,alpha-trehalase (EC 3.2.1.28); dextran dextrinase (EC 2.4.1.2)	Glycoside Hydrolases	CAZY	Starch Oligo Cleavage	0	0	0	0	0	0	0	0	0	0	0	0	0	0	0	1	2	1	0	4
GH28	GH28 polygalacturonase (EC 3.2.1.15); alpha-L-rhamnosidase (EC 3.2.1.40); exo-polygalacturonase (EC 3.2.1.67); exo-polygalacturonosidase (EC 3.2.1.82); rhamnogalacturonase (EC 3.2.1.171); rhamnogalacturonan alpha-1,2-galacturonohydrolase (EC 3.2.1.173); endo-xylogalacturonan hydrolase (EC 3.2.1.-)	Glycoside Hydrolases	CAZY	Pectin Backbone Cleavage	1	0	0	0	0	0	0	0	0	0	0	0	0	0	0	1	2	0	0	4
GH42	GH42 beta-galactosidase (EC 3.2.1.23); alpha-L-arabinopyranosidase (EC 3.2.1.-)	Glycoside Hydrolases	CAZY	Beta-galactan (pectic galactan) Oligo Cleavage	0	1	0	0	0	0	1	1	0	0	0	0	0	0	0	1	0	0	0	4
CE12	CE12 pectin acetylesterase (EC 3.1.1.-); rhamnogalacturonan acetylesterase (EC 3.1.1.-); acetyl xylan esterase (EC 3.1.1.72)	Carbohydrate Esterases	CAZY	Pectin Oligo Cleavage	0	0	0	0	0	0	0	0	2	0	0	0	0	0	0	0	0	0	1	3
GH125	GH125 exo-alpha-1,6-mannosidase (EC 3.2.1.-)	Glycoside Hydrolases	CAZY	Alpha-mannan Oligo Cleavage (Hemicellulose)	0	0	0	0	0	0	0	1	0	0	0	0	1	0	0	0	0	0	1	3
GH59	GH59 beta-galactosidase (EC 3.2.1.23); galactocerebrosidase (EC 3.2.1.46)	Glycoside Hydrolases	CAZY	Beta-galactan (pectic galactan) Oligo Cleavage	0	0	0	0	1	0	2	0	0	0	0	0	0	0	0	0	0	0	0	3
AA10	AA10 (formerly CBM33) proteins are copper-dependent lytic polysaccharide monooxygenases (LPMOs); some proteins have been shown to act on chitin, others on cellulose; lytic cellulose monooxygenase (C1-hydroxylating) (EC 1.14.99.54); lytic cellulose monooxygenase (C4-dehydrogenating)(EC 1.14.99.56); lytic chitin monooxygenase (EC 1.14.99.53)	Auxiliary Activities	CAZY	Crystalline Cellulose Backbone Cleavage, Crystalline Cellulose Backbone Cleavage, Chitin Oligo Cleavage	0	0	0	0	0	0	0	1	0	0	0	0	1	0	0	0	0	0	0	2
AA2	AA2 manganese peroxidase (EC 1.11.1.13); versatile peroxidase (EC 1.11.1.16); lignin peroxidase (EC 1.11.1.14); peroxidase (EC 1.11.1.-)	Auxiliary Activities	CAZY	Polyphenolics Cleavage	0	0	0	0	0	0	0	0	0	0	0	0	0	0	0	1	1	0	0	2
CE2	CE2 acetyl xylan esterase (EC 3.1.1.72).	Carbohydrate Esterases	CAZY	Beta-mannan Oligo Cleavage (Hemicellulose)	0	0	0	0	0	0	0	1	0	1	0	0	0	0	0	0	0	0	0	2
GH18	GH18 chitinase (EC 3.2.1.14); lysozyme (EC 3.2.1.17); endo-beta-N-acetylglucosaminidase (EC 3.2.1.96); peptidoglycan hydrolase with endo-beta-N-acetylglucosaminidase specificity (EC 3.2.1.-); Nod factor hydrolase (EC 3.2.1.-); xylanase inhibitor; concanavalin B; narbonin	Glycoside Hydrolases	CAZY	Chitin Backbone Cleavage	0	0	0	0	0	1	0	0	0	0	0	0	1	0	0	0	0	0	0	2
GH5	GH5 endo-beta-1,4-glucanase / cellulase (EC 3.2.1.4); endo-beta-1,4-xylanase (EC 3.2.1.8); beta-glucosidase (EC 3.2.1.21); beta-mannosidase (EC 3.2.1.25); beta-glucosylceramidase (EC 3.2.1.45); glucan beta-1,3-glucosidase (EC 3.2.1.58); licheninase (EC 3.2.1.73); exo-beta-1,4-glucanase / cellodextrinase (EC 3.2.1.74); glucan endo-1,6-beta-glucosidase (EC 3.2.1.75); mannan endo-beta-1,4-mannosidas…	Glycoside Hydrolases	CAZY	Amorphous Cellulose Backbone Cleavage, Amorphous Cellulose Oligo Cleavage, Xyloglucan Backbone Cleavage (Hemicellulose), Xylan Backbone Cleavage (Hemicellulose), Beta-mannan Backbone Cleavage (Hemicellulose), Mixed-Linkage glucans Backbone Cleavage (Hemicellulose), Chitin Oligo Cleavage	0	0	0	0	0	0	1	0	0	0	0	0	0	0	0	0	0	0	1	2
GH53	GH53 endo-beta-1,4-galactanase (EC 3.2.1.89).	Glycoside Hydrolases	CAZY	Beta-galactan (pectic galactan) Backbone Cleavage	0	0	0	1	0	0	0	0	0	0	0	0	0	0	0	1	0	0	0	2
GH92	GH92 mannosyl-oligosaccharide alpha-1,2-mannosidase (EC 3.2.1.113); mannosyl-oligosaccharide alpha-1,3-mannosidase (EC 3.2.1.-); mannosyl-oligosaccharide alpha-1,6-mannosidase (EC 3.2.1.-); alpha-mannosidase (EC 3.2.1.24); alpha-1,2-mannosidase (EC 3.2.1.-); alpha-1,3-mannosidase (EC 3.2.1.-); alpha-1,4-mannosidase (EC 3.2.1.-); mannosyl-1-phosphodiester alpha-1,P-mannosidase (EC 3.2.1.-)	Glycoside Hydrolases	CAZY	Alpha-mannan Oligo Cleavage (Hemicellulose)	0	0	0	0	0	0	0	1	0	0	0	0	1	0	0	0	0	0	0	2
GH93	GH93 exo-alpha-L-1,5-arabinanase (EC 3.2.1.-)	Glycoside Hydrolases	CAZY	Arabinan Oligo Cleavage	0	0	0	0	0	0	2	0	0	0	0	0	0	0	0	0	0	0	0	2
GH94	GH94 cellobiose phosphorylase (EC 2.4.1.20); laminaribiose phosphorylase (EC 2.4.1.31); cellodextrin phosphorylase (EC 2.4.1.49); chitobiose phosphorylase (EC 2.4.1.-); cyclic beta-1,2-glucan synthase (EC 2.4.1.-); cellobionic acid phosphorylase (EC 2.4.1.321); beta-1,2-oligoglucan phosphorylase (EC 2.4.1.-)	Glycoside Hydrolases	CAZY	Amorphous Cellulose Oligo Cleavage	0	0	0	0	0	1	0	0	0	0	0	0	0	0	0	0	0	0	1	2
PL1	PL1 pectate lyase (EC 4.2.2.2); exo-pectate lyase (EC 4.2.2.9); pectin lyase (EC 4.2.2.10).	Polysaccharide Lyases	CAZY	Pectin Backbone Cleavage	0	0	0	0	0	0	0	0	0	1	0	0	0	0	0	0	0	0	1	2
PL22	PL22 oligogalacturonate lyase / oligogalacturonide lyase (EC 4.2.2.6)	Polysaccharide Lyases	CAZY	Pectin Backbone Cleavage	0	0	0	0	0	0	0	0	0	0	0	0	0	0	0	1	1	0	0	2
PL4	PL4 rhamnogalacturonan endolyase (EC 4.2.2.23).	Polysaccharide Lyases	CAZY	Pectin Backbone Cleavage	0	0	0	0	0	0	0	0	2	0	0	0	0	0	0	0	0	0	0	2
CE8	CE8 pectin methylesterase (EC 3.1.1.11).	Carbohydrate Esterases	CAZY	Pectin Oligo Cleavage	0	0	0	0	0	0	0	0	0	0	0	0	0	0	0	0	0	0	1	1
GH10	GH10 endo-1,4-beta-xylanase (EC 3.2.1.8); endo-1,3-beta-xylanase (EC 3.2.1.32); tomatinase (EC 3.2.1.-); xylan endotransglycosylase (EC 2.4.2.-); endo-beta-1,4-glucanase (EC 3.2.1.4)	Glycoside Hydrolases	CAZY	Amorphous Cellulose Backbone Cleavage, Xyloglucan Oligo Cleavage (Hemicellulose), Xylan Backbone Cleavage (Hemicellulose)	0	0	0	0	0	0	0	0	0	0	0	0	0	0	0	0	1	0	0	1
GH115	GH115 xylan alpha-1,2-glucuronidase (3.2.1.131); alpha-(4-O-methyl)-glucuronidase (3.2.1.-)	Glycoside Hydrolases	CAZY	Xylan Oligo Cleavage (Hemicellulose)	0	0	0	0	0	0	1	0	0	0	0	0	0	0	0	0	0	0	0	1
GH141	GH141 alpha-L-fucosidase (EC 3.2.1.51); xylanase (EC 3.2.1.8)	Glycoside Hydrolases	CAZY	Xylan Backbone Cleavage (Hemicellulose), Fucose Oligo Cleavage	0	0	0	0	0	0	0	0	0	0	0	0	0	0	0	0	0	0	1	1
GH27	GH27 alpha-galactosidase (EC 3.2.1.22); alpha-N-acetylgalactosaminidase (EC 3.2.1.49); isomalto-dextranase (EC 3.2.1.94); beta-L-arabinopyranosidase (EC 3.2.1.88); galactan:galactan galactosyltransferase (EC 2.4.1.-)	Glycoside Hydrolases	CAZY	Alpha-galactans Oligo Cleavage, Mucin Oligo Cleavage	0	0	0	0	1	0	0	0	0	0	0	0	0	0	0	0	0	0	0	1
GH29	GH29 alpha-L-fucosidase (EC 3.2.1.51); alpha-1,3/1,4-L-fucosidase (EC 3.2.1.111)	Glycoside Hydrolases	CAZY	Fucose Oligo Cleavage	0	0	0	0	0	0	0	0	0	0	0	0	0	0	0	0	0	0	1	1
GH35	GH35 beta-galactosidase (EC 3.2.1.23); exo-beta-glucosaminidase (EC 3.2.1.165); exo-beta-1,4-galactanase (EC 3.2.1.-); beta-1,3-galactosidase (EC 3.2.1.-)	Glycoside Hydrolases	CAZY	Beta-galactan (pectic galactan) Oligo Cleavage	0	0	0	0	0	0	1	0	0	0	0	0	0	0	0	0	0	0	0	1
GH39	GH39 alpha-L-iduronidase (EC 3.2.1.76); beta-xylosidase (EC 3.2.1.37).	Glycoside Hydrolases	CAZY	Xylan Oligo Cleavage (Hemicellulose)	0	0	0	0	0	0	0	0	0	0	0	0	0	0	0	0	0	0	1	1
GH64	GH64 beta-1,3-glucanase (EC 3.2.1.39)	Glycoside Hydrolases	CAZY	Mixed-Linkage glucans Backbone Cleavage (Hemicellulose)	0	0	0	0	0	0	0	0	0	0	0	0	0	0	0	0	0	0	1	1
GH67	GH67 alpha-glucuronidase (EC 3.2.1.139); xylan alpha-1,2-glucuronidase (EC 3.2.1.131)	Glycoside Hydrolases	CAZY	Xylan Oligo Cleavage (Hemicellulose)	0	0	1	0	0	0	0	0	0	0	0	0	0	0	0	0	0	0	0	1
GH95	GH95 alpha-L-fucosidase (EC 3.2.1.51); alpha-1,2-L-fucosidase (EC 3.2.1.63); alpha-L-galactosidase (EC 3.2.1.-)	Glycoside Hydrolases	CAZY	Fucose Oligo Cleavage	0	0	0	0	0	0	0	0	0	0	0	0	0	0	0	0	0	0	1	1
PL11	PL11 rhamnogalacturonan endolyase (EC 4.2.2.23); rhamnogalacturonan exolyase (EC 4.2.2.24)	Polysaccharide Lyases	CAZY	Pectin Backbone Cleavage	0	0	0	0	0	0	0	0	0	0	0	0	0	0	0	0	0	0	1	1
PL33	PL33 hyaluronate lyase (EC 4.2.2.1); gellan lyase (EC 4.2.2.25); chondroitin sulfate lyase (EC 4.2.2.20)	Polysaccharide Lyases	CAZY	Sulf-Polysachharides Backbone Cleavage	0	0	0	0	0	0	0	0	0	0	0	0	0	0	0	0	0	0	1	1

## Sheet: Table S4
Organism Scientific Name	source	category_source	Organism Qualifier	Taxonomy id	Assembly Name	Assembly Accession	Source	Annotation	Level	Contig N50	Size	Submission Date	Gene Count	BioProject	BioSample
Lactococcus allomyrinae	Trypoxylus dichotomus	Insect	strain: 1JSPR-7	2419773	ASM362709v1	GCF_003627095.1	RefSeq	NCBI Prokaryotic Genome Annotation Pipeline (PGAP)	Complete Genome	2695154	2758410	2018-10-07	2665	PRJNA493670	SAMN10141031
Lactococcus carnosus	Meat	Food	strain: TMW 2.1612	2749961	ASM677026v1	GCF_006770265.1	RefSeq	NCBI Prokaryotic Genome Annotation Pipeline (PGAP)	Complete Genome	2156377	2156377	2019-07-09	2103	PRJNA342276	SAMN05756389
Lactococcus formosensis	Fermented broccoli stems	Fermented product	strain: NBRC 109475	1281486	ASM1840374v1	GCF_018403745.1	RefSeq	NCBI Prokaryotic Genome Annotation Pipeline (PGAP)	Contig	337726	2117277	2021-04-29	2077	PRJDB7793	SAMD00298583
Lactococcus fujiensis JCM 16395	Chinese cabbage	Fermented product	strain: JCM 16395	1291764	ASM244165v1	GCF_002441655.1	RefSeq	NCBI Prokaryotic Genome Annotation Pipeline (PGAP)	Contig	147753	2075869	2017-10-04	2063	PRJNA270383	SAMN03267150
Lactococcus garvieae	Human/Patogen	Human	strain: FDAARGOS_929	1363	ASM1602669v1	GCF_016026695.1	RefSeq	NCBI Prokaryotic Genome Annotation Pipeline (PGAP)	Complete Genome	2049769	2084337	2020-12-14	2104	PRJNA231221	SAMN13450459
Lactococcus hodotermopsidis	termite gut	Insect	strain: Hs30E4-3	2709157	ASM1117008v1	GCF_011170085.1	RefSeq	NCBI Prokaryotic Genome Annotation Pipeline (PGAP)	Contig	29636	2297451	2020-02-21	2223	PRJDB9332	SAMD00206659
Lactococcus insecticola	termite gut	Insect	strain: Hs20B0-1	2709158	ASM1117006v1	GCF_011170065.1	RefSeq	NCBI Prokaryotic Genome Annotation Pipeline (PGAP)	Contig	142093	1979452	2020-02-21	1925	PRJDB9331	SAMD00206658
Lactococcus lactis	Fermented batter of rice	Fermented product	strain: LAC460	1358	ASM2046375v1	GCF_020463755.1	RefSeq	NCBI Prokaryotic Genome Annotation Pipeline (PGAP)	Complete Genome	2426597	2426597	2021-10-13	2386	PRJNA645372	SAMN15502559
Lactococcus lactis subsp. cremoris KW2	fermented corn	Fermented product	strain: KW2	1295826	ASM46895v1	GCF_000468955.1	RefSeq	NCBI Prokaryotic Genome Annotation Pipeline (PGAP)	Complete Genome	2427048	2427048	2013-09-16	2353	PRJNA189982	SAMN02602975
Lactococcus laudensis	raw milk	Food	strain: DSM 28961	1494461	ASM1344973v1	GCF_013449735.1	RefSeq	NCBI Prokaryotic Genome Annotation Pipeline (PGAP)	Contig	98215	2296468	2020-07-21	2318	PRJNA644534	SAMN15463234
Lactococcus nasutitermitis	termite gut	Insect	strain: NBRC 111537	1652957	ASM1840376v1	GCF_018403765.1	RefSeq	NCBI Prokaryotic Genome Annotation Pipeline (PGAP)	Contig	277178	2189889	2021-04-29	2154	PRJDB7793	SAMD00298584
Lactococcus paracarnosus	Meat	Food	strain: TMW 2.1615	2749962	ASM677028v1	GCF_006770285.1	RefSeq	NCBI Prokaryotic Genome Annotation Pipeline (PGAP)	Complete Genome	2265140	2265140	2019-07-09	2248	PRJNA342276	SAMN05756390
Lactococcus petauri	Human	Human	strain: RJAA.1	1940789	ASM1483022v1	GCF_014830225.1	RefSeq	NCBI Prokaryotic Genome Annotation Pipeline (PGAP)	Contig	210163	2069988	2020-09-30	1995	PRJNA484321	SAMN09762690
Lactococcus plantarum NBRC 100936			strain: NBRC 100936	1348632	ASM159174v1	GCF_001591745.1	RefSeq	NCBI Prokaryotic Genome Annotation Pipeline (PGAP)	Contig	159696	1977763	2016-02-27	1899	PRJDB1323	SAMD00046919
Lactococcus protaetiae	Gut of Protaetia brevitarsis seulensis	Insect	strain: KACC 19320	2592653	ASM696544v1	GCF_006965445.1	RefSeq	NCBI Prokaryotic Genome Annotation Pipeline (PGAP)	Complete Genome	2696018	2696018	2019-07-14	2611	PRJNA552184	SAMN12179534
Lactococcus raffinolactis	kimchi	Fermented product	strain: WiKim0068	1366	ASM231047v1	GCF_002310475.1	RefSeq	NCBI Prokaryotic Genome Annotation Pipeline (PGAP)	Complete Genome	2217417	2292235	2017-09-18	2273	PRJNA404006	SAMN07627433
Lactococcus reticulitermitis	Reticulitermes speratus	Insect	strain: Rs-Y01	2025039	ASM226084v1	GCF_002260845.1	RefSeq	NCBI Prokaryotic Genome Annotation Pipeline (PGAP)	Contig	461990	2169598	2017-08-10	2168	PRJDB6150	SAMD00089645
Lactococcus taiwanensis	Grasshopper	Insect	strain: K_LL004	1151742	ASM1706835v1	GCF_017068355.1	RefSeq	NCBI Prokaryotic Genome Annotation Pipeline (PGAP)	Complete Genome	1995099	1995099	2021-02-28	1963	PRJNA702868	SAMN17981207
Lactococcus termiticola	Nasutitermes takasagoensis	Insect	strain: NtB2	2169526	ASM311683v1	GCF_003116835.1	RefSeq	NCBI Prokaryotic Genome Annotation Pipeline (PGAP)	Contig	181959	1734781	2018-05-08	1693	PRJDB6944	SAMD00115858

## Sheet: Table S5
GenomeA	GenomeB	score	index
C4C_bin8	Lactococcus lactis subsp. cremoris KW2	70.3	aai
C4C_bin8	Lactococcus plantarum	62.24	aai
C4C_bin8	Lactococcus reticulitermitis	61.75	aai
C4C_bin8	Lactococcus raffinolactis	61.98	aai
C4C_bin8	Lactococcus fujiensis	68.01	aai
C4C_bin8	Lactococcus termiticola	68.49	aai
C4C_bin8	Lactococcus allomyrinae	69.41	aai
C4C_bin8	Lactococcus carnosus	61.13	aai
C4C_bin8	Lactococcus paracarnosus	62.03	aai
C4C_bin8	Lactococcus protaetiae	69.51	aai
C4C_bin8	Lactococcus insecticola	62.59	aai
C4C_bin8	Lactococcus hodotermopsidis	61.98	aai
C4C_bin8	Lactococcus laudensis	61.5	aai
C4C_bin8	Lactococcus petauri	94.26	aai
C4C_bin8	Lactococcus garvieae	95.48	aai
C4C_bin8	Lactococcus taiwanensis	70.27	aai
C4C_bin8	Lactococcus formosensis	92.37	aai
C4C_bin8	Lactococcus nasutitermitis	69.04	aai
C4C_bin8	Lactococcus lactis	71.95	aai
C4C_bin8	C4C_bin8	100	aai
Lactococcus formosensis	C4C_bin8	94.07	caai
Lactococcus lactis subsp. cremoris KW2	C4C_bin8	71.3	caai
Lactococcus fujiensis	C4C_bin8	69.94	caai
Lactococcus insecticola	C4C_bin8	64.16	caai
Lactococcus hodotermopsidis	C4C_bin8	64.02	caai
Lactococcus lactis	C4C_bin8	72.76	caai
Lactococcus garvieae	C4C_bin8	97.76	caai
Lactococcus petauri	C4C_bin8	95.99	caai
Lactococcus taiwanensis	C4C_bin8	71.78	caai
Lactococcus allomyrinae	C4C_bin8	71.51	caai
Lactococcus protaetiae	C4C_bin8	71.8	caai
Lactococcus termiticola	C4C_bin8	69.64	caai
Lactococcus nasutitermitis	C4C_bin8	71.21	caai
Lactococcus raffinolactis	C4C_bin8	64.63	caai
Lactococcus plantarum	C4C_bin8	64.04	caai
Lactococcus paracarnosus	C4C_bin8	63.3	caai
Lactococcus laudensis	C4C_bin8	63.84	caai
Lactococcus carnosus	C4C_bin8	62.98	caai
Lactococcus reticulitermitis	C4C_bin8	63.81	caai
C4C_bin8	Lactococcus lactis subsp. cremoris KW2	50	ani
C4C_bin8	Lactococcus plantarum	50	ani
C4C_bin8	Lactococcus reticulitermitis	50	ani
C4C_bin8	Lactococcus raffinolactis	50	ani
C4C_bin8	Lactococcus fujiensis	50	ani
C4C_bin8	Lactococcus termiticola	50	ani
C4C_bin8	Lactococcus allomyrinae	50	ani
C4C_bin8	Lactococcus carnosus	50	ani
C4C_bin8	Lactococcus paracarnosus	50	ani
C4C_bin8	Lactococcus protaetiae	50	ani
C4C_bin8	Lactococcus insecticola	50	ani
C4C_bin8	Lactococcus hodotermopsidis	50	ani
C4C_bin8	Lactococcus laudensis	50	ani
C4C_bin8	Lactococcus petauri	52.62	pocp
C4C_bin8	Lactococcus garvieae	97.57	ani
C4C_bin8	Lactococcus taiwanensis	50	ani
C4C_bin8	Lactococcus formosensis	52.55	pocp
C4C_bin8	Lactococcus nasutitermitis	50	ani
C4C_bin8	Lactococcus lactis	50	ani
C4C_bin8	C4C_bin8	100	ani
Lactococcus formosensis	C4C_bin8	90.84	ani
Lactococcus lactis subsp. cremoris KW2	C4C_bin8	30	pocp
Lactococcus fujiensis	C4C_bin8	30	pocp
Lactococcus insecticola	C4C_bin8	30	pocp
Lactococcus hodotermopsidis	C4C_bin8	30	pocp
Lactococcus lactis	C4C_bin8	30	pocp
Lactococcus garvieae	C4C_bin8	54.74	pocp
Lactococcus petauri	C4C_bin8	92.46	ani
Lactococcus taiwanensis	C4C_bin8	45.64	pocp
Lactococcus allomyrinae	C4C_bin8	41.32	pocp
Lactococcus protaetiae	C4C_bin8	41.06	pocp
Lactococcus termiticola	C4C_bin8	40.19	pocp
Lactococcus nasutitermitis	C4C_bin8	40.03	pocp
Lactococcus raffinolactis	C4C_bin8	35.9	pocp
Lactococcus plantarum	C4C_bin8	35.07	pocp
Lactococcus paracarnosus	C4C_bin8	34.55	pocp
Lactococcus laudensis	C4C_bin8	34.49	pocp
Lactococcus carnosus	C4C_bin8	34.17	pocp
Lactococcus reticulitermitis	C4C_bin8	33.98	pocp

## Sheet: Table S6
contig_id	contig_length	provirus	proviral_length	gene_count	viral_genes	host_genes	checkv_quality	miuvig_quality	completeness	completeness_method	contamination	kmer_freq	warnings	total_length
C15A_NODE_107_length_27396_cov_1.653343	27396	No	NA	34	14	1	Low-quality	Genome-fragment	32.41	HMM-based (lower-bound)	0	1	NA	27396
C15A_NODE_11_length_211176_cov_41.662614_0_partial	112301	Yes	41187	130	25	46	Medium-quality	Genome-fragment	55.37	HMM-based (lower-bound)	63.32	1	low-confidence Provirus	41187
C15A_NODE_139_length_22044_cov_2.321394	22044	No	NA	26	18	1	Medium-quality	Genome-fragment	55.09	AAI-based (high-confidence)	0	1	NA	22044
C15A_NODE_170_length_19067_cov_1.186325	19067	No	NA	26	19	0	Low-quality	Genome-fragment	47.83	AAI-based (medium-confidence)	0	1	NA	19067
C15A_NODE_171_length_19018_cov_1.563761	19018	No	NA	24	4	2	Low-quality	Genome-fragment	33.14	HMM-based (lower-bound)	0	1	NA	19018
C15A_NODE_252_length_13859_cov_1.541436	13859	No	NA	28	7	2	Low-quality	Genome-fragment	37.96	AAI-based (high-confidence)	0	1.01	NA	13859
C15A_NODE_330_length_11641_cov_1.835591	11641	No	NA	13	5	0	Low-quality	Genome-fragment	30.84	AAI-based (medium-confidence)	0	1	NA	11641
C15A_NODE_349_length_11170_cov_3.892149	11170	No	NA	24	6	1	Low-quality	Genome-fragment	23.3	AAI-based (medium-confidence)	0	1	NA	11170
C15A_NODE_362_length_10807_cov_9.076685	10807	No	NA	16	1	0	Low-quality	Genome-fragment	7.85	HMM-based (lower-bound)	0	1	NA	10807
C15A_NODE_408_length_10068_cov_1.249170	10068	No	NA	6	0	0	Not-determined	Genome-fragment	NA	NA	0	1	no viral genes detected	10068
C15A_NODE_53_length_55985_cov_9.832719_full	55985	Yes	28783	80	24	22	Medium-quality	Genome-fragment	75.78	AAI-based (medium-confidence)	48.59	1	NA	28783
C15A_NODE_57_length_52500_cov_6.765127	52500	Yes	40862	75	29	9	High-quality	High-quality	97.93	AAI-based (high-confidence)	22.17	1	NA	40862
C15B_NODE_118_length_25566_cov_4.589017_full	25566	Yes	17977	34	6	9	Low-quality	Genome-fragment	25.33	HMM-based (lower-bound)	29.68	1	NA	17977
C15B_NODE_188_length_19249_cov_3.546543	19249	No	NA	27	10	0	Low-quality	Genome-fragment	41.26	AAI-based (medium-confidence)	0	1	NA	19249
C15B_NODE_194_length_18906_cov_1.085415	18906	No	NA	22	18	0	Low-quality	Genome-fragment	16.17	AAI-based (medium-confidence)	0	1	NA	18906
C15B_NODE_219_length_17493_cov_1.866463_full	17493	No	NA	20	3	0	High-quality	High-quality	100	AAI-based (high-confidence)	0	1	NA	17493
C15B_NODE_409_length_12625_cov_2.022244	12625	No	NA	14	13	0	Low-quality	Genome-fragment	32.59	AAI-based (high-confidence)	0	1	NA	12625
C15B_NODE_448_length_12018_cov_0.937179_full	12018	No	NA	19	1	1	Low-quality	Genome-fragment	6.97	HMM-based (lower-bound)	0	1	NA	12018
C15B_NODE_573_length_10565_cov_2.408603	10565	No	NA	11	1	2	Low-quality	Genome-fragment	5.24	AAI-based (medium-confidence)	0	1	NA	10565
C15B_NODE_600_length_10322_cov_1.374497	10322	No	NA	18	7	0	Low-quality	Genome-fragment	22.97	AAI-based (medium-confidence)	0	1	NA	10322
C15B_NODE_60_length_49438_cov_2.809617	49438	Yes	39883	59	24	3	Medium-quality	Genome-fragment	84.12	AAI-based (medium-confidence)	19.33	1	NA	39883
C15B_NODE_91_length_31916_cov_1.851143_full	31916	Yes	13924	33	12	9	Low-quality	Genome-fragment	25.46	HMM-based (lower-bound)	56.37	1	NA	13924
C15C_NODE_124_length_23663_cov_10.055277	23663	No	NA	35	6	2	Low-quality	Genome-fragment	44.36	HMM-based (lower-bound)	0	1.4	NA	23663
C15C_NODE_156_length_20443_cov_14.038492	20443	No	NA	37	13	1	Medium-quality	Genome-fragment	50.9	AAI-based (medium-confidence)	0	1	NA	20443
C15C_NODE_162_length_19868_cov_1.332557_full	19868	No	NA	23	2	2	Low-quality	Genome-fragment	42.04	HMM-based (lower-bound)	0	1	NA	19868
C15C_NODE_20_length_117275_cov_2.942790_0_partial	11637	No	NA	17	1	3	Low-quality	Genome-fragment	10.55	HMM-based (lower-bound)	0	1	NA	11637
C15C_NODE_266_length_14469_cov_0.935644	14469	No	NA	15	14	0	Low-quality	Genome-fragment	34.24	AAI-based (high-confidence)	0	1	NA	14469
C15C_NODE_276_length_14165_cov_9.089329	14165	Yes	13328	15	8	2	Low-quality	Genome-fragment	32.61	AAI-based (medium-confidence)	5.91	1.01	NA	13328
C15C_NODE_280_length_14077_cov_2.966523	14077	No	NA	17	12	1	Low-quality	Genome-fragment	37.36	AAI-based (medium-confidence)	0	1	NA	14077
C15C_NODE_2_length_724735_cov_31.759834_1_partial	38481	Yes	36120	44	23	3	Medium-quality	Genome-fragment	84.34	AAI-based (high-confidence)	6.14	1	NA	36120
C15C_NODE_455_length_10210_cov_0.816027	10210	No	NA	15	13	0	Low-quality	Genome-fragment	26.93	AAI-based (high-confidence)	0	1	NA	10210
C15C_NODE_478_length_10031_cov_0.766761	10031	No	NA	14	11	0	Low-quality	Genome-fragment	14.79	HMM-based (lower-bound)	0	1	NA	10031
C2A_NODE_151_length_20865_cov_1.303983	20865	No	NA	19	13	0	Medium-quality	Genome-fragment	54.58	AAI-based (medium-confidence)	0	1	NA	20865
C2A_NODE_263_length_15094_cov_1.364068	15094	No	NA	19	15	0	Low-quality	Genome-fragment	36.89	AAI-based (medium-confidence)	0	1	NA	15094
C2A_NODE_288_length_14252_cov_1.450549	14252	No	NA	21	1	0	Low-quality	Genome-fragment	25.37	HMM-based (lower-bound)	0	1.01	low-confidence DTR	14252
C2A_NODE_324_length_13419_cov_16.683494	13419	No	NA	9	5	0	Low-quality	Genome-fragment	35.11	AAI-based (medium-confidence)	0	1	NA	13419
C2A_NODE_349_length_13033_cov_3.792345_full	13033	No	NA	24	3	1	Low-quality	Genome-fragment	8.03	HMM-based (lower-bound)	0	1	NA	13033
C2A_NODE_378_length_12471_cov_0.960467	12471	No	NA	15	6	1	Low-quality	Genome-fragment	26.2	HMM-based (lower-bound)	0	1	NA	12471
C2A_NODE_399_length_12024_cov_16.523157	12024	No	NA	25	9	0	Low-quality	Genome-fragment	14.81	HMM-based (lower-bound)	0	1	NA	12024
C2A_NODE_9_length_109088_cov_8.302778_full	109088	Yes	33111	134	23	51	Medium-quality	Genome-fragment	61.77	HMM-based (lower-bound)	69.65	1	NA	33111
C2B_NODE_125_length_24045_cov_10.820888	24045	No	NA	41	19	1	Medium-quality	Genome-fragment	66.29	AAI-based (high-confidence)	0	1	NA	24045
C2B_NODE_140_length_22790_cov_1.426643	22790	No	NA	33	12	0	Medium-quality	Genome-fragment	57.37	AAI-based (medium-confidence)	0	1	NA	22790
C2B_NODE_224_length_16440_cov_13.937351	16440	No	NA	25	13	0	Low-quality	Genome-fragment	44.49	AAI-based (medium-confidence)	0	1	NA	16440
C2B_NODE_347_length_12620_cov_3.667414_full	12620	No	NA	16	5	0	Low-quality	Genome-fragment	41.02	AAI-based (medium-confidence)	0	1	NA	12620
C2B_NODE_36_length_47053_cov_4.738759_full	47053	Yes	35064	62	28	12	High-quality	High-quality	94.9	AAI-based (medium-confidence)	25.48	1	NA	35064
C2B_NODE_421_length_11094_cov_1.337011	11094	No	NA	34	11	0	Low-quality	Genome-fragment	7.52	AAI-based (high-confidence)	0	1	NA	11094
C2B_NODE_425_length_11026_cov_0.905312	11026	No	NA	16	11	0	Low-quality	Genome-fragment	32.79	AAI-based (medium-confidence)	0	1	NA	11026
C2B_NODE_451_length_10673_cov_2.675517_full	10673	No	NA	17	5	1	Low-quality	Genome-fragment	20.31	HMM-based (lower-bound)	0	1	NA	10673
C2B_NODE_502_length_10118_cov_2.648884	10118	No	NA	18	3	1	Low-quality	Genome-fragment	23.03	AAI-based (medium-confidence)	0	1	NA	10118
C2B_NODE_89_length_29067_cov_1.172564	29067	No	NA	44	28	0	Medium-quality	Genome-fragment	72.44	AAI-based (medium-confidence)	0	1	NA	29067
C2C_NODE_135_length_20576_cov_1.142843	20576	No	NA	22	18	0	Low-quality	Genome-fragment	45.17	AAI-based (medium-confidence)	0	1	NA	20576
C2C_NODE_194_length_16880_cov_1.535367	16880	No	NA	17	16	0	Low-quality	Genome-fragment	42.94	AAI-based (high-confidence)	0	1	NA	16880
C2C_NODE_276_length_13888_cov_8.876535	13888	No	NA	14	1	7	Low-quality	Genome-fragment	4.09	HMM-based (lower-bound)	0	1.38	NA	13888
C2C_NODE_410_length_11475_cov_17.766567	11475	No	NA	23	3	1	Low-quality	Genome-fragment	24.91	HMM-based (lower-bound)	0	1	NA	11475
C2C_NODE_438_length_11187_cov_7.431917	11187	No	NA	11	4	0	Low-quality	Genome-fragment	31.02	AAI-based (medium-confidence)	0	1	NA	11187
C2C_NODE_82_length_30459_cov_1.717097	30459	No	NA	42	25	0	Medium-quality	Genome-fragment	75.2	AAI-based (medium-confidence)	0	1	NA	30459
C40A_NODE_15_length_149055_cov_20.127041_full	149055	Yes	44293	185	27	71	Complete	High-quality	100	Provirus (high-confidence)	70.28	1	contig >1.5x longer than expected genome length	44293
C40A_NODE_176_length_19785_cov_1.611049	19785	No	NA	16	11	0	Medium-quality	Genome-fragment	52.05	AAI-based (medium-confidence)	0	1	NA	19785
C40A_NODE_193_length_18366_cov_2.134328	18366	No	NA	36	13	0	Low-quality	Genome-fragment	13.59	AAI-based (medium-confidence)	0	1	NA	18366
C40A_NODE_234_length_16128_cov_1.596400	16128	No	NA	18	10	0	Low-quality	Genome-fragment	27.31	AAI-based (high-confidence)	0	1	NA	16128
C40A_NODE_280_length_14573_cov_1.378236	14573	No	NA	35	19	0	Low-quality	Genome-fragment	30.42	AAI-based (high-confidence)	0	1	NA	14573
C40A_NODE_297_length_13929_cov_1.374801	13929	No	NA	19	13	0	Low-quality	Genome-fragment	29.69	AAI-based (high-confidence)	0	1	NA	13929
C40A_NODE_298_length_13914_cov_1.305868	13914	No	NA	28	6	0	Low-quality	Genome-fragment	9.44	AAI-based (high-confidence)	0	1	NA	13914
C40A_NODE_304_length_13711_cov_1.332744	13711	No	NA	14	12	0	Low-quality	Genome-fragment	32.36	AAI-based (high-confidence)	0	1	NA	13711
C40A_NODE_321_length_13433_cov_1.957613	13433	No	NA	20	10	0	Low-quality	Genome-fragment	8.94	AAI-based (high-confidence)	0	1	NA	13433
C40A_NODE_324_length_13335_cov_1.236599	13335	No	NA	15	11	0	Low-quality	Genome-fragment	28.31	AAI-based (high-confidence)	0	1	NA	13335
C40A_NODE_341_length_13029_cov_1.512324	13029	No	NA	19	4	1	Low-quality	Genome-fragment	20.96	HMM-based (lower-bound)	0	1	NA	13029
C40A_NODE_370_length_12488_cov_3.290349	12488	No	NA	21	5	0	Low-quality	Genome-fragment	24.56	AAI-based (medium-confidence)	0	1	NA	12488
C40A_NODE_418_length_11774_cov_1.767837	11774	No	NA	12	8	0	Low-quality	Genome-fragment	25.51	AAI-based (medium-confidence)	0	1	NA	11774
C40A_NODE_437_length_11382_cov_1.282097	11382	No	NA	14	2	1	Low-quality	Genome-fragment	41.14	AAI-based (medium-confidence)	0	1	NA	11382
C40A_NODE_446_length_11339_cov_1.609882	11339	No	NA	12	6	0	Low-quality	Genome-fragment	17.32	AAI-based (high-confidence)	0	1	NA	11339
C40A_NODE_471_length_10926_cov_3.060746	10926	No	NA	27	10	0	Low-quality	Genome-fragment	5.96	AAI-based (medium-confidence)	0	1	NA	10926
C40A_NODE_517_length_10311_cov_2.897192	10311	No	NA	16	4	1	Low-quality	Genome-fragment	17.96	HMM-based (lower-bound)	0	1	NA	10311
C40A_NODE_553_length_10025_cov_1.199838	10025	No	NA	15	6	0	Low-quality	Genome-fragment	21.51	AAI-based (high-confidence)	0	1	NA	10025
C40A_NODE_72_length_44446_cov_3.724994	44446	No	NA	60	34	2	High-quality	High-quality	100	AAI-based (high-confidence)	0	1	NA	44446
C40B_NODE_236_length_13087_cov_3.465432	13087	No	NA	33	6	0	Low-quality	Genome-fragment	30.32	AAI-based (medium-confidence)	0	1	NA	13087
C40B_NODE_297_length_11220_cov_1.744343	11220	No	NA	24	5	0	Low-quality	Genome-fragment	29.19	AAI-based (high-confidence)	0	1	NA	11220
C40B_NODE_300_length_11168_cov_1.131872	11168	No	NA	12	6	0	Low-quality	Genome-fragment	29.43	AAI-based (medium-confidence)	0	1	NA	11168
C40B_NODE_74_length_27901_cov_1.480449_0_partial	10532	No	NA	14	5	0	Low-quality	Genome-fragment	26.42	AAI-based (medium-confidence)	0	1	NA	10532
C40C_NODE_103_length_33924_cov_5.073912	33924	No	NA	38	4	2	Medium-quality	Genome-fragment	72.66	AAI-based (medium-confidence)	0	1	NA	33924
C40C_NODE_108_length_33034_cov_2.202632	33034	No	NA	43	11	2	High-quality	High-quality	99.11	AAI-based (medium-confidence)	0	1	NA	33034
C40C_NODE_121_length_28843_cov_3.998677	28843	Yes	24448	47	23	3	Medium-quality	Genome-fragment	67.4	AAI-based (high-confidence)	15.24	1	NA	24448
C40C_NODE_122_length_28549_cov_1.615685	28549	No	NA	43	25	0	Medium-quality	Genome-fragment	65.95	AAI-based (medium-confidence)	0	1	NA	28549
C40C_NODE_173_length_20720_cov_1.447045	20720	No	NA	27	24	0	Low-quality	Genome-fragment	44.03	AAI-based (high-confidence)	0	1	NA	20720
C40C_NODE_190_length_18913_cov_1.816832_full	18913	No	NA	25	1	1	Low-quality	Genome-fragment	5.67	HMM-based (lower-bound)	0	1	NA	18913
C40C_NODE_219_length_16901_cov_5.167998	16901	No	NA	29	9	0	Low-quality	Genome-fragment	33.14	AAI-based (medium-confidence)	0	1	NA	16901
C40C_NODE_229_length_16587_cov_2.066768	16587	No	NA	25	14	0	Low-quality	Genome-fragment	39.75	AAI-based (high-confidence)	0	1	NA	16587
C40C_NODE_271_length_14858_cov_0.976241	14858	No	NA	17	12	0	Low-quality	Genome-fragment	30.82	AAI-based (high-confidence)	0	1	NA	14858
C40C_NODE_316_length_13436_cov_1.245849	13436	No	NA	30	18	0	Low-quality	Genome-fragment	31.4	AAI-based (high-confidence)	0	1	NA	13436
C40C_NODE_359_length_12282_cov_1.333114	12282	No	NA	15	10	0	Low-quality	Genome-fragment	28.02	AAI-based (medium-confidence)	0	1	NA	12282
C40C_NODE_466_length_10593_cov_1.811389	10593	No	NA	16	13	0	Low-quality	Genome-fragment	7.05	AAI-based (high-confidence)	0	1	NA	10593
C40C_NODE_94_length_37073_cov_1.324474	37073	No	NA	69	11	0	High-quality	High-quality	92.76	AAI-based (high-confidence)	0	1	NA	37073
C4A_NODE_161_length_20719_cov_1.028700	20719	No	NA	28	18	0	Medium-quality	Genome-fragment	54.26	AAI-based (medium-confidence)	0	1	NA	20719
C4A_NODE_299_length_14835_cov_2.529032	14835	No	NA	22	12	0	Low-quality	Genome-fragment	32.19	AAI-based (medium-confidence)	0	1	NA	14835
C4A_NODE_301_length_14830_cov_4.368428	14830	No	NA	21	12	0	Low-quality	Genome-fragment	15.92	HMM-based (lower-bound)	0	1	NA	14830
C4A_NODE_324_length_14089_cov_7.333978	14089	No	NA	35	15	0	Low-quality	Genome-fragment	38.27	AAI-based (high-confidence)	0	1	NA	14089
C4A_NODE_429_length_12019_cov_0.881349	12019	No	NA	22	3	1	Low-quality	Genome-fragment	19.47	HMM-based (lower-bound)	0	1	NA	12019
C4A_NODE_431_length_11952_cov_2.213953	11952	No	NA	21	7	0	Low-quality	Genome-fragment	18.92	HMM-based (lower-bound)	0	1	NA	11952
C4A_NODE_447_length_11609_cov_11.594409	11609	No	NA	15	2	0	Low-quality	Genome-fragment	24.39	HMM-based (lower-bound)	0	1	NA	11609
C4A_NODE_517_length_10747_cov_3.789454	10747	No	NA	24	3	0	Low-quality	Genome-fragment	15.84	HMM-based (lower-bound)	0	1	NA	10747
C4A_NODE_542_length_10478_cov_2.009951_full	10478	No	NA	13	1	2	Low-quality	Genome-fragment	14.58	HMM-based (lower-bound)	0	1	NA	10478
C4A_NODE_546_length_10455_cov_0.840046	10455	No	NA	19	8	0	Low-quality	Genome-fragment	7.09	AAI-based (high-confidence)	0	1	NA	10455
C4A_NODE_90_length_27574_cov_1.395708	27574	Yes	24913	37	23	3	Medium-quality	Genome-fragment	65.4	AAI-based (medium-confidence)	9.65	1	NA	24913
C4A_NODE_94_length_26946_cov_20.324956	26946	No	NA	43	20	0	Medium-quality	Genome-fragment	64.71	AAI-based (high-confidence)	0	1	NA	26946
C4B_NODE_112_length_22147_cov_1.638692	22147	No	NA	42	14	2	Low-quality	Genome-fragment	14.78	AAI-based (high-confidence)	0	1	NA	22147
C4B_NODE_163_length_17595_cov_1.339707	17595	No	NA	33	17	1	Low-quality	Genome-fragment	44.06	AAI-based (medium-confidence)	0	1	NA	17595
C4B_NODE_276_length_13326_cov_1.109705	13326	No	NA	23	12	0	Low-quality	Genome-fragment	9.04	AAI-based (high-confidence)	0	1	NA	13326
C4B_NODE_307_length_12613_cov_1.169630	12613	No	NA	18	15	0	Low-quality	Genome-fragment	8.4	AAI-based (high-confidence)	0	1	NA	12613
C4B_NODE_405_length_11071_cov_1.776681	11071	No	NA	11	6	0	Low-quality	Genome-fragment	27.09	AAI-based (high-confidence)	0	1	NA	11071
C4B_NODE_406_length_11069_cov_1.581886	11069	No	NA	13	2	0	Low-quality	Genome-fragment	11.27	AAI-based (high-confidence)	0	1	NA	11069
C4B_NODE_415_length_10937_cov_1.235338	10937	No	NA	13	1	1	Low-quality	Genome-fragment	44.72	AAI-based (high-confidence)	0	1	NA	10937
C4B_NODE_461_length_10445_cov_1.033824	10445	No	NA	13	13	0	Low-quality	Genome-fragment	34.11	AAI-based (medium-confidence)	0	1	NA	10445
C4B_NODE_481_length_10229_cov_1.152940	10229	No	NA	13	11	1	Low-quality	Genome-fragment	29.28	AAI-based (high-confidence)	0	1	NA	10229
C4C_NODE_138_length_26640_cov_6.889450	26640	No	NA	33	10	2	Medium-quality	Genome-fragment	65.59	AAI-based (high-confidence)	0	1	NA	26640
C4C_NODE_216_length_18946_cov_9.986662	18946	No	NA	33	8	1	Low-quality	Genome-fragment	30.7	HMM-based (lower-bound)	0	1	NA	18946
C4C_NODE_228_length_18512_cov_0.965461	18512	No	NA	36	8	1	Low-quality	Genome-fragment	28.18	HMM-based (lower-bound)	0	1	NA	18512
C4C_NODE_257_length_17445_cov_6.970955	17445	No	NA	31	2	0	High-quality	High-quality	100	AAI-based (high-confidence)	0	1	NA	17445
C4C_NODE_258_length_17407_cov_2.554514	17407	No	NA	26	5	0	Low-quality	Genome-fragment	27.28	HMM-based (lower-bound)	0	1.04	NA	17407
C4C_NODE_32_length_60613_cov_1.667460_full	60613	Yes	40171	70	25	9	Medium-quality	Genome-fragment	76.59	HMM-based (lower-bound)	33.73	1.01	NA	40171
C4C_NODE_503_length_11531_cov_5.594879	11531	No	NA	13	2	0	Low-quality	Genome-fragment	27.26	HMM-based (lower-bound)	0	1.04	NA	11531
C4C_NODE_560_length_10814_cov_11.328436	10814	No	NA	19	10	0	Low-quality	Genome-fragment	27.08	AAI-based (medium-confidence)	0	1	NA	10814
C4C_NODE_614_length_10359_cov_6.929828	10359	No	NA	18	9	0	Low-quality	Genome-fragment	30.76	AAI-based (medium-confidence)	0	1	NA	10359
C8A_NODE_143_length_25652_cov_1.555416_full	25652	No	NA	23	1	17	Low-quality	Genome-fragment	28.28	HMM-based (lower-bound)	0	1	NA	25652
C8A_NODE_190_length_22270_cov_1.441042	22270	No	NA	42	17	3	Low-quality	Genome-fragment	46.19	AAI-based (high-confidence)	0	1	NA	22270
C8A_NODE_232_length_20059_cov_2.810706	20059	No	NA	40	14	0	Medium-quality	Genome-fragment	50.15	AAI-based (high-confidence)	0	1	NA	20059
C8A_NODE_235_length_19512_cov_1.776425	19512	No	NA	26	23	0	Low-quality	Genome-fragment	49.82	AAI-based (medium-confidence)	0	1	NA	19512
C8A_NODE_260_length_18562_cov_2.800054	18562	Yes	17066	45	10	2	Low-quality	Genome-fragment	45.28	AAI-based (high-confidence)	8.06	1	NA	17066
C8A_NODE_276_length_17811_cov_0.874689	17811	No	NA	18	15	0	Low-quality	Genome-fragment	46.73	AAI-based (medium-confidence)	0	1	NA	17811
C8A_NODE_280_length_17466_cov_9.071227	17466	No	NA	16	9	0	Low-quality	Genome-fragment	44.38	AAI-based (high-confidence)	0	1	NA	17466
C8A_NODE_33_length_66532_cov_30.567036_full	66532	Yes	34759	82	23	26	Medium-quality	Genome-fragment	87.56	AAI-based (medium-confidence)	47.76	1	contig >1.5x longer than expected genome length	34759
C8A_NODE_366_length_14898_cov_0.958771	14898	No	NA	20	19	0	Low-quality	Genome-fragment	31.09	AAI-based (high-confidence)	0	1	NA	14898
C8A_NODE_414_length_13876_cov_1.554440	13876	No	NA	23	7	0	Low-quality	Genome-fragment	33.11	AAI-based (high-confidence)	0	1	NA	13876
C8A_NODE_487_length_12726_cov_0.872450	12726	No	NA	19	16	0	Low-quality	Genome-fragment	37.87	AAI-based (high-confidence)	0	1	NA	12726
C8A_NODE_573_length_11507_cov_1.761424	11507	No	NA	16	7	0	Low-quality	Genome-fragment	18.19	HMM-based (lower-bound)	0	1	NA	11507
C8A_NODE_610_length_11082_cov_1.564217	11082	No	NA	17	12	0	Low-quality	Genome-fragment	14.69	AAI-based (high-confidence)	0	1	NA	11082
C8A_NODE_64_length_43104_cov_1.344044	43104	No	NA	53	7	0	High-quality	High-quality	97.48	AAI-based (medium-confidence)	0	1	NA	43104
C8A_NODE_701_length_10266_cov_9.885886	10266	No	NA	15	1	1	Low-quality	Genome-fragment	23.49	HMM-based (lower-bound)	0	1	NA	10266
C8A_NODE_704_length_10256_cov_0.746767	10256	No	NA	26	2	0	Low-quality	Genome-fragment	25.41	AAI-based (high-confidence)	0	1	NA	10256
C8A_NODE_97_length_33743_cov_19.339481	33743	No	NA	35	2	6	Medium-quality	Genome-fragment	56.48	HMM-based (lower-bound)	0	1.01	NA	33743
C8B_NODE_123_length_29759_cov_7.274332	29759	No	NA	53	27	0	Medium-quality	Genome-fragment	75.51	AAI-based (high-confidence)	0	1	NA	29759
C8B_NODE_150_length_25728_cov_1.916019	25728	No	NA	31	7	0	Medium-quality	Genome-fragment	51.88	HMM-based (lower-bound)	0	1.01	NA	25728
C8B_NODE_263_length_17809_cov_4.638276_full	17809	No	NA	13	1	9	Low-quality	Genome-fragment	11.24	HMM-based (lower-bound)	0	1	NA	17809
C8B_NODE_284_length_17072_cov_1.510416	17072	No	NA	28	9	0	Low-quality	Genome-fragment	42.29	AAI-based (high-confidence)	0	1	NA	17072
C8B_NODE_576_length_10622_cov_1.413626	10622	No	NA	13	0	0	Not-determined	Genome-fragment	NA	NA	0	1.01	no viral genes detected	10622
C8B_NODE_87_length_37876_cov_2.718562	37876	Yes	36576	55	31	3	Medium-quality	Genome-fragment	89.67	AAI-based (medium-confidence)	3.43	1	NA	36576
C8C_NODE_194_length_20689_cov_1.376228	20689	No	NA	19	6	0	Low-quality	Genome-fragment	22.49	AAI-based (high-confidence)	0	1	NA	20689
C8C_NODE_44_length_70873_cov_9.149846_full	70873	Yes	37064	80	25	18	Medium-quality	Genome-fragment	53.22	AAI-based (high-confidence)	47.7	1	low-confidence Provirus	37064
C8C_NODE_530_length_10663_cov_1.485383	10663	No	NA	18	2	6	Low-quality	Genome-fragment	21.34	HMM-based (lower-bound)	0	1	NA	10663
C8C_NODE_55_length_55025_cov_13.215818_full	55025	Yes	16068	52	12	26	Low-quality	Genome-fragment	33.02	AAI-based (medium-confidence)	70.8	1	NA	16068
C8C_NODE_69_length_47254_cov_41.871263_full	47254	Yes	22338	55	19	16	Low-quality	Genome-fragment	41.76	HMM-based (lower-bound)	52.73	1	NA	22338
C8C_NODE_71_length_45431_cov_3.062025	45431	No	NA	52	39	0	High-quality	High-quality	100	AAI-based (high-confidence)	0	1	NA	45431
T0A_NODE_121_length_19981_cov_2.000302	19981	No	NA	27	22	0	Low-quality	Genome-fragment	13.28	AAI-based (medium-confidence)	0	1	NA	19981
T0A_NODE_138_length_18750_cov_1.681845	18750	No	NA	23	17	0	Low-quality	Genome-fragment	40.62	AAI-based (high-confidence)	0	1	NA	18750
T0A_NODE_143_length_18291_cov_1.757212	18291	No	NA	28	21	0	Low-quality	Genome-fragment	45.65	AAI-based (high-confidence)	0	1	NA	18291
T0A_NODE_153_length_17523_cov_1.087664	17523	No	NA	34	18	0	Low-quality	Genome-fragment	36.73	AAI-based (high-confidence)	0	1	NA	17523
T0A_NODE_160_length_16972_cov_2.045948	16972	No	NA	22	18	0	Low-quality	Genome-fragment	36.09	AAI-based (high-confidence)	0	1	NA	16972
T0A_NODE_183_length_15877_cov_1.341016	15877	No	NA	15	13	0	Low-quality	Genome-fragment	32.22	AAI-based (high-confidence)	0	1	NA	15877
T0A_NODE_18_length_64197_cov_2.956032	64197	No	NA	73	24	0	High-quality	High-quality	100	AAI-based (high-confidence)	0	1.02	NA	64197
T0A_NODE_192_length_15478_cov_0.878444_0_partial	11465	No	NA	20	1	1	Low-quality	Genome-fragment	14.13	HMM-based (lower-bound)	0	1	NA	11465
T0A_NODE_193_length_15474_cov_2.166352	15474	No	NA	39	15	0	Low-quality	Genome-fragment	36.89	AAI-based (high-confidence)	0	1	NA	15474
T0A_NODE_196_length_15382_cov_3.023271	15382	No	NA	20	12	0	Low-quality	Genome-fragment	35.68	AAI-based (high-confidence)	0	1	NA	15382
T0A_NODE_202_length_15043_cov_1.401113	15043	No	NA	16	15	0	Low-quality	Genome-fragment	25.99	AAI-based (high-confidence)	0	1	NA	15043
T0A_NODE_211_length_14683_cov_1.277068	14683	No	NA	12	11	0	Low-quality	Genome-fragment	25.37	AAI-based (high-confidence)	0	1	NA	14683
T0A_NODE_221_length_14412_cov_0.969058	14412	No	NA	19	14	0	Low-quality	Genome-fragment	33.8	AAI-based (medium-confidence)	0	1	NA	14412
T0A_NODE_293_length_12112_cov_0.772632	12112	No	NA	19	2	0	Low-quality	Genome-fragment	6.03	HMM-based (lower-bound)	0	1	NA	12112
T0A_NODE_298_length_11923_cov_2.588250	11923	No	NA	16	14	0	Low-quality	Genome-fragment	25.26	AAI-based (high-confidence)	0	1	NA	11923
T0A_NODE_301_length_11835_cov_1.763837	11835	No	NA	24	13	0	Low-quality	Genome-fragment	12.97	HMM-based (lower-bound)	0	1	NA	11835
T0A_NODE_323_length_11468_cov_1.852482	11468	No	NA	16	14	0	Low-quality	Genome-fragment	28.6	AAI-based (high-confidence)	0	1	NA	11468
T0A_NODE_331_length_11353_cov_2.165954	11353	No	NA	25	11	0	Low-quality	Genome-fragment	26.28	AAI-based (high-confidence)	0	1	NA	11353
T0A_NODE_364_length_10660_cov_2.543910_full	10660	No	NA	16	4	0	Low-quality	Genome-fragment	21.71	AAI-based (medium-confidence)	0	1	NA	10660
T0A_NODE_389_length_10369_cov_0.786077	10369	No	NA	18	10	0	Low-quality	Genome-fragment	10.54	AAI-based (medium-confidence)	0	1	NA	10369
T0A_NODE_75_length_25348_cov_1.160818	25348	No	NA	43	20	0	Low-quality	Genome-fragment	43.8	AAI-based (high-confidence)	0	1	NA	25348
T0B_NODE_107_length_23474_cov_42.111449_0_partial	20342	Yes	16073	19	3	5	Low-quality	Genome-fragment	20.11	HMM-based (lower-bound)	20.99	1	NA	16073
T0B_NODE_118_length_22753_cov_2.389331	22753	No	NA	22	13	0	Medium-quality	Genome-fragment	56.37	AAI-based (high-confidence)	0	1	NA	22753
T0B_NODE_123_length_22418_cov_3.068503	22418	No	NA	21	18	0	Medium-quality	Genome-fragment	55.93	AAI-based (high-confidence)	0	1	NA	22418
T0B_NODE_125_length_21931_cov_1.183132	21931	No	NA	17	5	2	Low-quality	Genome-fragment	21.91	AAI-based (medium-confidence)	0	1	NA	21931
T0B_NODE_131_length_21560_cov_2.646153	21560	No	NA	36	18	0	Low-quality	Genome-fragment	49.39	AAI-based (high-confidence)	0	1	NA	21560
T0B_NODE_189_length_18263_cov_2.246692	18263	No	NA	23	18	0	Low-quality	Genome-fragment	37.68	AAI-based (high-confidence)	0	1	NA	18263
T0B_NODE_198_length_17871_cov_1.476217	17871	No	NA	25	0	0	Not-determined	Genome-fragment	NA	NA	0	1	no viral genes detected	17871
T0B_NODE_211_length_17229_cov_1.549877	17229	No	NA	19	2	0	Low-quality	Genome-fragment	4.21	HMM-based (lower-bound)	0	1	NA	17229
T0B_NODE_213_length_17106_cov_1.411273_full	17106	No	NA	26	7	2	Low-quality	Genome-fragment	40.12	AAI-based (medium-confidence)	0	1	NA	17106
T0B_NODE_230_length_16482_cov_1.119719	16482	No	NA	26	8	0	Low-quality	Genome-fragment	40.83	AAI-based (high-confidence)	0	1	NA	16482
T0B_NODE_236_length_16100_cov_0.881174	16100	No	NA	30	4	1	Low-quality	Genome-fragment	6.08	HMM-based (lower-bound)	0	1	NA	16100
T0B_NODE_239_length_16035_cov_2.690847	16035	No	NA	10	9	0	Low-quality	Genome-fragment	36	AAI-based (high-confidence)	0	1	NA	16035
T0B_NODE_284_length_14954_cov_1.340527_full	14954	No	NA	12	1	3	Low-quality	Genome-fragment	37.37	AAI-based (medium-confidence)	0	1	NA	14954
T0B_NODE_289_length_14805_cov_2.949176	14805	No	NA	22	15	0	Low-quality	Genome-fragment	35.03	AAI-based (high-confidence)	0	1	NA	14805
T0B_NODE_295_length_14669_cov_0.891005	14669	No	NA	18	2	0	Low-quality	Genome-fragment	7.13	HMM-based (lower-bound)	0	1	NA	14669
T0B_NODE_320_length_14099_cov_2.788506	14099	No	NA	17	16	0	Low-quality	Genome-fragment	32.52	AAI-based (high-confidence)	0	1	NA	14099
T0B_NODE_324_length_13981_cov_2.200881	13981	No	NA	14	10	0	Low-quality	Genome-fragment	30.96	AAI-based (high-confidence)	0	1	NA	13981
T0B_NODE_328_length_13913_cov_1.343102	13913	No	NA	17	15	0	Low-quality	Genome-fragment	32.5	AAI-based (medium-confidence)	0	1	NA	13913
T0B_NODE_329_length_13899_cov_34.399288	13899	No	NA	14	7	1	Low-quality	Genome-fragment	43.17	AAI-based (high-confidence)	0	1	NA	13899
T0B_NODE_377_length_13017_cov_1.470675	13017	No	NA	16	0	0	Not-determined	Genome-fragment	NA	NA	0	1	no viral genes detected	13017
T0B_NODE_379_length_12997_cov_1.165657	12997	No	NA	16	14	0	Low-quality	Genome-fragment	26.45	AAI-based (high-confidence)	0	1	NA	12997
T0B_NODE_394_length_12692_cov_1.088420	12692	No	NA	16	0	0	Not-determined	Genome-fragment	NA	NA	0	1.01	no viral genes detected	12692
T0B_NODE_416_length_12437_cov_1.127620	12437	No	NA	15	6	0	Low-quality	Genome-fragment	30.81	AAI-based (high-confidence)	0	1	NA	12437
T0B_NODE_418_length_12430_cov_1.291311	12430	No	NA	11	9	0	Low-quality	Genome-fragment	30.79	AAI-based (high-confidence)	0	1	NA	12430
T0B_NODE_425_length_12276_cov_1.099926_full	12276	No	NA	10	0	0	Not-determined	Genome-fragment	NA	NA	0	1	no viral genes detected	12276
T0B_NODE_42_length_41656_cov_1.647572	41656	No	NA	50	23	0	Complete	High-quality	100	DTR (high-confidence)	0	1	NA	41656
T0B_NODE_431_length_12189_cov_1.346957	12189	No	NA	20	2	0	Low-quality	Genome-fragment	6.07	HMM-based (lower-bound)	0	1	NA	12189
T0B_NODE_435_length_12155_cov_1.384021_full	12155	No	NA	18	7	1	Low-quality	Genome-fragment	28.03	AAI-based (high-confidence)	0	1	NA	12155
T0B_NODE_444_length_12069_cov_1.136242	12069	No	NA	17	9	0	Low-quality	Genome-fragment	13.38	AAI-based (medium-confidence)	0	1	NA	12069
T0B_NODE_452_length_12013_cov_1.735066	12013	No	NA	13	0	0	Not-determined	Genome-fragment	NA	NA	0	1	no viral genes detected	12013
T0B_NODE_461_length_11885_cov_1.382803	11885	No	NA	6	3	0	Low-quality	Genome-fragment	11.97	AAI-based (medium-confidence)	0	1	NA	11885
T0B_NODE_488_length_11574_cov_1.136368_full	11574	No	NA	20	8	0	Low-quality	Genome-fragment	24.39	AAI-based (high-confidence)	0	1	NA	11574
T0B_NODE_501_length_11444_cov_1.104356	11444	No	NA	28	11	0	Low-quality	Genome-fragment	7.6	AAI-based (medium-confidence)	0	1	NA	11444
T0B_NODE_516_length_11302_cov_2.401969	11302	No	NA	17	14	0	Low-quality	Genome-fragment	28.21	AAI-based (high-confidence)	0	1	NA	11302
T0B_NODE_547_length_10924_cov_1.262295	10924	No	NA	9	0	0	Not-determined	Genome-fragment	NA	NA	0	1	no viral genes detected	10924
T0B_NODE_55_length_35838_cov_36.268965_full	35838	No	NA	27	5	17	Low-quality	Genome-fragment	41.74	HMM-based (lower-bound)	0	1	NA	35838
T0B_NODE_568_length_10797_cov_1.263636	10797	No	NA	17	3	0	Low-quality	Genome-fragment	5.46	HMM-based (lower-bound)	0	1	NA	10797
T0B_NODE_592_length_10486_cov_1.596390	10486	No	NA	12	8	0	Low-quality	Genome-fragment	23.31	AAI-based (high-confidence)	0	1	NA	10486
T0B_NODE_601_length_10427_cov_1.305631	10427	No	NA	12	2	0	Low-quality	Genome-fragment	3.22	HMM-based (lower-bound)	0	1	NA	10427
T0B_NODE_605_length_10403_cov_0.944142	10403	No	NA	23	4	0	Low-quality	Genome-fragment	5.87	HMM-based (lower-bound)	0	1	NA	10403
T0B_NODE_607_length_10375_cov_1.592603	10375	No	NA	13	2	0	Low-quality	Genome-fragment	17.77	HMM-based (lower-bound)	0	1.01	low-confidence DTR	10375
T0B_NODE_614_length_10312_cov_1.050270	10312	No	NA	17	15	0	Low-quality	Genome-fragment	30.2	AAI-based (high-confidence)	0	1	NA	10312
T0B_NODE_622_length_10271_cov_1.067823	10271	No	NA	24	11	0	Low-quality	Genome-fragment	7.02	AAI-based (medium-confidence)	0	1	NA	10271
T0B_NODE_629_length_10193_cov_0.888138	10193	No	NA	18	3	0	Low-quality	Genome-fragment	31.26	AAI-based (medium-confidence)	0	1	NA	10193
T0B_NODE_64_length_33331_cov_1.517648	33331	No	NA	35	2	5	Low-quality	Genome-fragment	47.63	HMM-based (lower-bound)	0	1	NA	33331
T0B_NODE_92_length_26384_cov_1.285752	26384	Yes	23897	29	2	3	Low-quality	Genome-fragment	5.61	HMM-based (lower-bound)	9.43	1	NA	23897
T0C_NODE_101_length_20668_cov_1.145465	20668	No	NA	31	21	0	Low-quality	Genome-fragment	14.12	AAI-based (medium-confidence)	0	1	NA	20668
T0C_NODE_102_length_20620_cov_21.529547_full	20620	Yes	12058	25	15	6	Low-quality	Genome-fragment	36.59	AAI-based (high-confidence)	41.52	1	NA	12058
T0C_NODE_125_length_18146_cov_1.425107	18146	No	NA	41	17	0	Low-quality	Genome-fragment	12.07	AAI-based (medium-confidence)	0	1	NA	18146
T0C_NODE_127_length_18006_cov_1.148610	18006	No	NA	41	20	0	Low-quality	Genome-fragment	10.26	AAI-based (high-confidence)	0	1	NA	18006
T0C_NODE_139_length_17393_cov_3.030117	17393	No	NA	16	2	0	Low-quality	Genome-fragment	19.12	AAI-based (high-confidence)	0	1	NA	17393
T0C_NODE_147_length_17109_cov_1.213697	17109	No	NA	18	16	0	Low-quality	Genome-fragment	18.9	AAI-based (medium-confidence)	0	1	NA	17109
T0C_NODE_193_length_15118_cov_1.165566	15118	No	NA	15	1	0	Low-quality	Genome-fragment	6.58	HMM-based (lower-bound)	0	1	NA	15118
T0C_NODE_212_length_14354_cov_1.415126	14354	No	NA	19	14	0	Low-quality	Genome-fragment	25.9	AAI-based (high-confidence)	0	1	NA	14354
T0C_NODE_243_length_13302_cov_0.964706	13302	No	NA	14	1	1	Low-quality	Genome-fragment	9.28	AAI-based (high-confidence)	0	1.02	NA	13302
T0C_NODE_249_length_13204_cov_2.836048	13204	No	NA	27	10	0	Low-quality	Genome-fragment	8.95	AAI-based (high-confidence)	0	1	NA	13204
T0C_NODE_24_length_42565_cov_3.486451	42565	No	NA	59	24	0	High-quality	High-quality	100	AAI-based (high-confidence)	0	1	NA	42565
T0C_NODE_270_length_12610_cov_1.618681	12610	No	NA	10	10	0	Low-quality	Genome-fragment	31.47	AAI-based (high-confidence)	0	1	NA	12610
T0C_NODE_283_length_12437_cov_1.047360	12437	No	NA	22	2	0	Low-quality	Genome-fragment	3.55	HMM-based (lower-bound)	0	1	NA	12437
T0C_NODE_289_length_12361_cov_0.981445	12361	No	NA	19	0	0	Not-determined	Genome-fragment	NA	NA	0	1	no viral genes detected	12361
T0C_NODE_307_length_12017_cov_1.123802	12017	No	NA	18	2	1	Low-quality	Genome-fragment	20.55	HMM-based (lower-bound)	0	1	NA	12017
T0C_NODE_342_length_11416_cov_1.182390	11416	No	NA	26	3	0	Low-quality	Genome-fragment	10.06	HMM-based (lower-bound)	0	1	NA	11416
T0C_NODE_344_length_11392_cov_1.288327	11392	No	NA	12	12	0	Low-quality	Genome-fragment	6.45	AAI-based (high-confidence)	0	1	NA	11392
T0C_NODE_352_length_11143_cov_1.091231	11143	No	NA	13	3	1	Low-quality	Genome-fragment	3.17	HMM-based (lower-bound)	0	1	NA	11143
T0C_NODE_389_length_10646_cov_1.069683	10646	No	NA	15	1	0	Low-quality	Genome-fragment	4.94	HMM-based (lower-bound)	0	1	NA	10646
T0C_NODE_50_length_29781_cov_2.254637	29781	No	NA	28	25	0	Medium-quality	Genome-fragment	74.24	AAI-based (high-confidence)	0	1	NA	29781
T0C_NODE_59_length_26297_cov_1.103707	26297	No	NA	31	1	1	Low-quality	Genome-fragment	11.63	HMM-based (lower-bound)	0	1	NA	26297
T0C_NODE_84_length_22228_cov_1.164382	22228	No	NA	24	4	3	Low-quality	Genome-fragment	13.64	AAI-based (medium-confidence)	0	1	NA	22228

## Sheet: Table S7
contig_name	idx	prediction
C15A_NODE_11_length_211176_cov_41.662614_0_partial_1	0_0	Drexlerviridae_like
C15A_NODE_53_length_55985_cov_9.832719_full_1	0_1	Bronfenbrennervirinae
C15A_NODE_57_length_52500_cov_6.765127_1	0_2	Tybeckvirinae
C15B_NODE_118_length_25566_cov_4.589017_full_1	0_3	Obolenskvirus
C15B_NODE_60_length_49438_cov_2.809617_1	0_4	Triavirus
C15C_NODE_276_length_14165_cov_9.089329_1	0_6	Efquatrovirus
C15C_NODE_2_length_724735_cov_31.759834_1_partial_1	0_7	Tybeckvirinae
C2A_NODE_9_length_109088_cov_8.302778_full_1	0_8	Bronfenbrennervirinae
C2B_NODE_36_length_47053_cov_4.738759_full_1	0_9	Efquatrovirus
C40A_NODE_15_length_149055_cov_20.127041_full_1	0_10	Azeredovirinae
C40C_NODE_121_length_28843_cov_3.998677_1	0_11	Bronfenbrennervirinae
C4A_NODE_90_length_27574_cov_1.395708_1	0_12	Azeredovirinae
C4C_NODE_32_length_60613_cov_1.667460_full_1	0_13	Azeredovirinae
C8A_NODE_260_length_18562_cov_2.800054_1	0_14	Azeredovirinae
C8A_NODE_33_length_66532_cov_30.567036_full_1	0_15	Bronfenbrennervirinae
C8C_NODE_44_length_70873_cov_9.149846_full_1	0_17	Bronfenbrennervirinae
C8C_NODE_55_length_55025_cov_13.215818_full_1	0_18	Efquatrovirus
C8C_NODE_69_length_47254_cov_41.871263_full_1	0_19	Efquatrovirus
T0C_NODE_102_length_20620_cov_21.529547_full_1	0_22	Peduoviridae
C15A_NODE_107_length_27396_cov_1.653343	0_23	Drexlerviridae_like
C15A_NODE_139_length_22044_cov_2.321394	0_24	Bronfenbrennervirinae
C15A_NODE_170_length_19067_cov_1.186325	0_25	Azeredovirinae_like
C15A_NODE_252_length_13859_cov_1.541436	0_27	Azeredovirinae
C15A_NODE_330_length_11641_cov_1.835591	0_28	Tybeckvirinae_like
C15A_NODE_349_length_11170_cov_3.892149	0_29	Azeredovirinae
C15A_NODE_408_length_10068_cov_1.249170	0_31	Bronfenbrennervirinae
C15B_NODE_188_length_19249_cov_3.546543	0_32	Triavirus
C15B_NODE_194_length_18906_cov_1.085415	0_33	Stephanstirmvirinae
C15B_NODE_219_length_17493_cov_1.866463_full	0_34	Skunavirus_like
C15B_NODE_573_length_10565_cov_2.408603	0_37	Phycodnaviridae
C15B_NODE_600_length_10322_cov_1.374497	0_38	Triavirus
C15C_NODE_156_length_20443_cov_14.038492	0_40	Azeredovirinae
C15C_NODE_280_length_14077_cov_2.966523	0_44	Tybeckvirinae_like
C15C_NODE_455_length_10210_cov_0.816027	0_45	Azeredovirinae
C2A_NODE_324_length_13419_cov_16.683494	0_50	Mccleskeyvirinae
C2A_NODE_399_length_12024_cov_16.523157	0_53	Azeredovirinae_like
C2B_NODE_125_length_24045_cov_10.820888	0_54	Bronfenbrennervirinae
C2B_NODE_140_length_22790_cov_1.426643	0_55	Efquatrovirus
C2B_NODE_224_length_16440_cov_13.937351	0_56	Efquatrovirus
C2B_NODE_347_length_12620_cov_3.667414_full	0_57	Skunavirus
C2B_NODE_421_length_11094_cov_1.337011	0_58	Stephanstirmvirinae
C2B_NODE_425_length_11026_cov_0.905312	0_59	Mccleskeyvirinae
C2B_NODE_451_length_10673_cov_2.675517_full	0_60	Inoviridae_like
C2B_NODE_502_length_10118_cov_2.648884	0_61	Tybeckvirinae_like
C2B_NODE_89_length_29067_cov_1.172564	0_62	Azeredovirinae
C2C_NODE_135_length_20576_cov_1.142843	0_63	Hendrixvirinae
C2C_NODE_194_length_16880_cov_1.535367	0_64	Tybeckvirinae_like
C2C_NODE_438_length_11187_cov_7.431917	0_67	Skunavirus_like
C2C_NODE_82_length_30459_cov_1.717097	0_68	Herelleviridae
C40A_NODE_176_length_19785_cov_1.611049	0_69	Tybeckvirinae_like
C40A_NODE_193_length_18366_cov_2.134328	0_70	Stephanstirmvirinae
C40A_NODE_234_length_16128_cov_1.596400	0_71	Casjensviridae
C40A_NODE_280_length_14573_cov_1.378236	0_72	Obolenskvirus
C40A_NODE_297_length_13929_cov_1.374801	0_73	Obolenskvirus
C40A_NODE_298_length_13914_cov_1.305868	0_74	Stephanstirmvirinae
C40A_NODE_304_length_13711_cov_1.332744	0_75	Triavirus
C40A_NODE_321_length_13433_cov_1.957613	0_76	Stephanstirmvirinae
C40A_NODE_324_length_13335_cov_1.236599	0_77	Autographiviridae
C40A_NODE_341_length_13029_cov_1.512324	0_78	Skunavirus_like
C40A_NODE_370_length_12488_cov_3.290349	0_79	Azeredovirinae
C40A_NODE_418_length_11774_cov_1.767837	0_80	Triavirus
C40A_NODE_446_length_11339_cov_1.609882	0_82	Tybeckvirinae
C40A_NODE_471_length_10926_cov_3.060746	0_83	Vequintavirinae
C40A_NODE_517_length_10311_cov_2.897192	0_84	Inoviridae_like
C40A_NODE_553_length_10025_cov_1.199838	0_85	Drexlerviridae
C40A_NODE_72_length_44446_cov_3.724994	0_86	Skunavirus_like
C40B_NODE_236_length_13087_cov_3.465432	0_87	Azeredovirinae_like
C40B_NODE_297_length_11220_cov_1.744343	0_88	Tybeckvirinae_like
C40B_NODE_300_length_11168_cov_1.131872	0_89	Efquatrovirus
C40B_NODE_74_length_27901_cov_1.480449_0_partial	0_90	Mccleskeyvirinae
C40C_NODE_103_length_33924_cov_5.073912	0_91	Fernvirus
C40C_NODE_108_length_33034_cov_2.202632	0_92	Mccleskeyvirinae
C40C_NODE_122_length_28549_cov_1.615685	0_93	Azeredovirinae
C40C_NODE_173_length_20720_cov_1.447045	0_94	Obolenskvirus
C40C_NODE_219_length_16901_cov_5.167998	0_96	Eucampyvirinae_like
C40C_NODE_229_length_16587_cov_2.066768	0_97	Tybeckvirinae_like
C40C_NODE_271_length_14858_cov_0.976241	0_98	Tybeckvirinae
C40C_NODE_316_length_13436_cov_1.245849	0_99	Hendrixvirinae
C40C_NODE_466_length_10593_cov_1.811389	0_101	Stephanstirmvirinae
C40C_NODE_94_length_37073_cov_1.324474	0_102	Obolenskvirus
C4A_NODE_161_length_20719_cov_1.028700	0_103	Azeredovirinae
C4A_NODE_299_length_14835_cov_2.529032	0_104	Triavirus
C4A_NODE_324_length_14089_cov_7.333978	0_106	Triavirus_like
C4A_NODE_431_length_11952_cov_2.213953	0_108	Chaseviridae_like
C4A_NODE_517_length_10747_cov_3.789454	0_110	Mccleskeyvirinae
C4A_NODE_546_length_10455_cov_0.840046	0_112	Demerecviridae_like
C4A_NODE_94_length_26946_cov_20.324956	0_113	Azeredovirinae
C4B_NODE_112_length_22147_cov_1.638692	0_114	Stephanstirmvirinae
C4B_NODE_163_length_17595_cov_1.339707	0_115	Azeredovirinae
C4B_NODE_276_length_13326_cov_1.109705	0_116	Stephanstirmvirinae
C4B_NODE_307_length_12613_cov_1.169630	0_117	Stephanstirmvirinae
C4B_NODE_406_length_11069_cov_1.581886	0_119	Schitoviridae
C4B_NODE_461_length_10445_cov_1.033824	0_121	Skunavirus
C4C_NODE_138_length_26640_cov_6.889450	0_123	Efquatrovirus
C4C_NODE_216_length_18946_cov_9.986662	0_124	Azeredovirinae
C4C_NODE_228_length_18512_cov_0.965461	0_125	Azeredovirinae
C4C_NODE_258_length_17407_cov_2.554514	0_127	Fernvirus
C4C_NODE_560_length_10814_cov_11.328436	0_129	Obolenskvirus_like
C4C_NODE_614_length_10359_cov_6.929828	0_130	Herelleviridae
C8A_NODE_143_length_25652_cov_1.555416_full	0_131	Peduoviridae
C8A_NODE_232_length_20059_cov_2.810706	0_133	Bronfenbrennervirinae
C8A_NODE_235_length_19512_cov_1.776425	0_134	Azeredovirinae_like
C8A_NODE_276_length_17811_cov_0.874689	0_135	Tybeckvirinae_like
C8A_NODE_280_length_17466_cov_9.071227	0_136	Skunavirus_like
C8A_NODE_366_length_14898_cov_0.958771	0_137	Hendrixvirinae_like
C8A_NODE_414_length_13876_cov_1.554440	0_138	Weiservirinae
C8A_NODE_487_length_12726_cov_0.872450	0_139	Herelleviridae
C8A_NODE_573_length_11507_cov_1.761424	0_140	Obolenskvirus_like
C8A_NODE_610_length_11082_cov_1.564217	0_141	Schitoviridae
C8B_NODE_123_length_29759_cov_7.274332	0_146	Skunavirus_like
C8B_NODE_284_length_17072_cov_1.510416	0_149	Peduoviridae_like
C8C_NODE_71_length_45431_cov_3.062025	0_153	Autographiviridae
T0A_NODE_121_length_19981_cov_2.000302	0_154	Stephanstirmvirinae
T0A_NODE_138_length_18750_cov_1.681845	0_155	Queuovirinae
T0A_NODE_143_length_18291_cov_1.757212	0_156	Autographiviridae
T0A_NODE_153_length_17523_cov_1.087664	0_157	Zobellviridae
T0A_NODE_160_length_16972_cov_2.045948	0_158	Obolenskvirus
T0A_NODE_183_length_15877_cov_1.341016	0_159	Zobellviridae
T0A_NODE_18_length_64197_cov_2.956032	0_160	Sepvirinae
T0A_NODE_192_length_15478_cov_0.878444_0_partial	0_161	Hendrixvirinae
T0A_NODE_193_length_15474_cov_2.166352	0_162	Hendrixvirinae
T0A_NODE_202_length_15043_cov_1.401113	0_164	Casjensviridae
T0A_NODE_211_length_14683_cov_1.277068	0_165	Casjensviridae
T0A_NODE_221_length_14412_cov_0.969058	0_166	Hendrixvirinae
T0A_NODE_298_length_11923_cov_2.588250	0_168	Queuovirinae
T0A_NODE_301_length_11835_cov_1.763837	0_169	Stephanstirmvirinae_like
T0A_NODE_323_length_11468_cov_1.852482	0_170	Autographiviridae
T0A_NODE_331_length_11353_cov_2.165954	0_171	Sepvirinae
T0A_NODE_389_length_10369_cov_0.786077	0_173	Ounavirinae
T0A_NODE_75_length_25348_cov_1.160818	0_174	Casjensviridae
T0B_NODE_118_length_22753_cov_2.389331	0_175	Peduoviridae_like
T0B_NODE_123_length_22418_cov_3.068503	0_176	Autographiviridae
T0B_NODE_131_length_21560_cov_2.646153	0_178	Autographiviridae
T0B_NODE_189_length_18263_cov_2.246692	0_179	Hendrixvirinae
T0B_NODE_213_length_17106_cov_1.411273_full	0_182	Sepvirinae
T0B_NODE_230_length_16482_cov_1.119719	0_183	Peduoviridae_like
T0B_NODE_236_length_16100_cov_0.881174	0_184	Vequintavirinae
T0B_NODE_239_length_16035_cov_2.690847	0_185	Autographiviridae
T0B_NODE_289_length_14805_cov_2.949176	0_187	Chaseviridae
T0B_NODE_320_length_14099_cov_2.788506	0_189	Hendrixvirinae
T0B_NODE_324_length_13981_cov_2.200881	0_190	Autographiviridae
T0B_NODE_328_length_13913_cov_1.343102	0_191	Hendrixvirinae
T0B_NODE_329_length_13899_cov_34.399288	0_192	Peduoviridae
T0B_NODE_379_length_12997_cov_1.165657	0_194	Drexlerviridae
T0B_NODE_394_length_12692_cov_1.088420	0_195	Adenoviridae
T0B_NODE_416_length_12437_cov_1.127620	0_196	Peduoviridae_like
T0B_NODE_418_length_12430_cov_1.291311	0_197	Peduoviridae_like
T0B_NODE_42_length_41656_cov_1.647572	0_199	Peduoviridae_like
T0B_NODE_435_length_12155_cov_1.384021_full	0_201	Peduoviridae
T0B_NODE_444_length_12069_cov_1.136242	0_202	Ounavirinae
T0B_NODE_488_length_11574_cov_1.136368_full	0_205	Sepvirinae
T0B_NODE_501_length_11444_cov_1.104356	0_206	Stephanstirmvirinae
T0B_NODE_516_length_11302_cov_2.401969	0_207	Autographiviridae
T0B_NODE_55_length_35838_cov_36.268965_full	0_209	Peduoviridae
T0B_NODE_592_length_10486_cov_1.596390	0_211	Autographiviridae
T0B_NODE_614_length_10312_cov_1.050270	0_215	Peduoviridae
T0B_NODE_622_length_10271_cov_1.067823	0_216	Stephanstirmvirinae
T0B_NODE_629_length_10193_cov_0.888138	0_217	Peduoviridae
T0C_NODE_101_length_20668_cov_1.145465	0_219	Stephanstirmvirinae
T0C_NODE_125_length_18146_cov_1.425107	0_220	Stephanstirmvirinae
T0C_NODE_127_length_18006_cov_1.148610	0_221	Straboviridae
T0C_NODE_147_length_17109_cov_1.213697	0_223	Ounavirinae
T0C_NODE_212_length_14354_cov_1.415126	0_225	Gracegardnervirinae
T0C_NODE_243_length_13302_cov_0.964706	0_226	Anelloviridae
T0C_NODE_249_length_13204_cov_2.836048	0_227	Stephanstirmvirinae
T0C_NODE_24_length_42565_cov_3.486451	0_228	Hendrixvirinae
T0C_NODE_270_length_12610_cov_1.618681	0_229	Autographiviridae
T0C_NODE_344_length_11392_cov_1.288327	0_234	Straboviridae
T0C_NODE_352_length_11143_cov_1.091231	0_235	Peduoviridae
T0C_NODE_50_length_29781_cov_2.254637	0_237	Autographiviridae
T0C_NODE_84_length_22228_cov_1.164382	0_239	Straboviridae

## Sheet: Table S8
Virus	AAI to closest RaFAH reference	Host genus	Confidence score	List of methods
C15A_NODE_107_length_27396_cov_1.653343	16.09	d__Bacteria;p__Firmicutes;c__Bacilli;o__Lactobacillales;f__Lactobacillaceae;g__Limosilactobacillus	97.2	RaFAH;97.00 iPHoP-RF;66.50
C15A_NODE_107_length_27396_cov_1.653343	16.09	d__Bacteria;p__Firmicutes;c__Bacilli;o__Lactobacillales;f__Lactobacillaceae;g__Lacticaseibacillus	95.7	RaFAH;97.00
C15A_NODE_107_length_27396_cov_1.653343	16.09	d__Bacteria;p__Firmicutes;c__Bacilli;o__Lactobacillales;f__Lactobacillaceae;g__Lactobacillus	95.7	RaFAH;97.00
C15A_NODE_107_length_27396_cov_1.653343	16.09	d__Bacteria;p__Firmicutes;c__Bacilli;o__Lactobacillales;f__Lactobacillaceae;g__Ligilactobacillus	95.7	RaFAH;97.00
C15A_NODE_107_length_27396_cov_1.653343	16.09	d__Bacteria;p__Firmicutes;c__Bacilli;o__Lactobacillales;f__Lactobacillaceae;g__Levilactobacillus	91.5	blast;93.80 iPHoP-RF;87.30 CRISPR;74.00
C15A_NODE_11_length_211176_cov_41.662614_0_partial_1	23.57	d__Bacteria;p__Firmicutes;c__Bacilli;o__Lactobacillales;f__Lactobacillaceae;g__Lacticaseibacillus	92.9	RaFAH;94.90
C15A_NODE_11_length_211176_cov_41.662614_0_partial_1	23.57	d__Bacteria;p__Firmicutes;c__Bacilli;o__Lactobacillales;f__Lactobacillaceae;g__Lactobacillus	92.9	RaFAH;94.90
C15A_NODE_11_length_211176_cov_41.662614_0_partial_1	23.57	d__Bacteria;p__Firmicutes;c__Bacilli;o__Lactobacillales;f__Lactobacillaceae;g__Ligilactobacillus	92.9	RaFAH;94.90
C15A_NODE_11_length_211176_cov_41.662614_0_partial_1	23.57	d__Bacteria;p__Firmicutes;c__Bacilli;o__Lactobacillales;f__Lactobacillaceae;g__Limosilactobacillus	92.9	RaFAH;94.90
C15A_NODE_11_length_211176_cov_41.662614_0_partial_1	23.57	d__Bacteria;p__Firmicutes;c__Bacilli;o__Lactobacillales;f__Lactobacillaceae;g__Lentilactobacillus	91.4	blast;93.70 iPHoP-RF;90.50 CRISPR;54.60
C15A_NODE_139_length_22044_cov_2.321394	40.39	d__Bacteria;p__Firmicutes;c__Bacilli;o__Lactobacillales;f__Streptococcaceae;g__Lactococcus	95.7	blast;96.70 iPHoP-RF;95.10 RaFAH;54.80
C15A_NODE_171_length_19018_cov_1.563761	4.36	d__Bacteria;p__Firmicutes;c__Bacilli;o__Lactobacillales;f__Lactobacillaceae;g__Lacticaseibacillus	99.3	RaFAH;99.40
C15A_NODE_171_length_19018_cov_1.563761	4.36	d__Bacteria;p__Firmicutes;c__Bacilli;o__Lactobacillales;f__Lactobacillaceae;g__Lactobacillus	99.3	RaFAH;99.40
C15A_NODE_171_length_19018_cov_1.563761	4.36	d__Bacteria;p__Firmicutes;c__Bacilli;o__Lactobacillales;f__Lactobacillaceae;g__Ligilactobacillus	99.3	RaFAH;99.40
C15A_NODE_171_length_19018_cov_1.563761	4.36	d__Bacteria;p__Firmicutes;c__Bacilli;o__Lactobacillales;f__Lactobacillaceae;g__Limosilactobacillus	99.3	RaFAH;99.40
C15A_NODE_252_length_13859_cov_1.541436	19.55	d__Bacteria;p__Firmicutes;c__Bacilli;o__Lactobacillales;f__Streptococcaceae;g__Lactococcus	99.9	blast;98.40 iPHoP-RF;95.70 RaFAH;92.20
C15A_NODE_330_length_11641_cov_1.835591	12.01	d__Bacteria;p__Firmicutes;c__Bacilli;o__Lactobacillales;f__Lactobacillaceae;g__Limosilactobacillus	97.6	blast;91.90 RaFAH;89.50
C15A_NODE_330_length_11641_cov_1.835591	12.01	d__Bacteria;p__Firmicutes;c__Bacilli;o__Lactobacillales;f__Lactobacillaceae;g__Lactiplantibacillus	91.5	blast;93.80 iPHoP-RF;73.70
C15A_NODE_362_length_10807_cov_9.076685	3.61	d__Bacteria;p__Firmicutes;c__Bacilli;o__Lactobacillales;f__Lactobacillaceae;g__Weissella	91.4	blast;93.70 iPHoP-RF;75.20
C15A_NODE_53_length_55985_cov_9.832719_full_1	35.24	d__Bacteria;p__Firmicutes;c__Bacilli;o__Lactobacillales;f__Lactobacillaceae;g__Leuconostoc	94.5	iPHoP-RF;96.10 blast;95.50 CRISPR;58.90
C15A_NODE_57_length_52500_cov_6.765127_1	57.14	d__Bacteria;p__Firmicutes;c__Bacilli;o__Lactobacillales;f__Lactobacillaceae;g__Lactiplantibacillus	95.2	blast;96.60 iPHoP-RF;72.80 CRISPR;51.50
C15B_NODE_188_length_19249_cov_3.546543	64.28	d__Bacteria;p__Firmicutes_A;c__Clostridia;o__Clostridiales;f__Clostridiaceae;g__Clostridium_B	91.7	blast;94.00 iPHoP-RF;66.30
C15B_NODE_219_length_17493_cov_1.866463_full	38.14	d__Bacteria;p__Firmicutes;c__Bacilli;o__Lactobacillales;f__Streptococcaceae;g__Lactococcus	96.9	blast;96.90 iPHoP-RF;95.70 RaFAH;64.70
C15B_NODE_448_length_12018_cov_0.937179_full	4.11	d__Bacteria;p__Firmicutes;c__Bacilli;o__Lactobacillales;f__Lactobacillaceae;g__Lactobacillus	93.2	blast;95.20 iPHoP-RF;70.00
C15B_NODE_600_length_10322_cov_1.374497	10.99	d__Bacteria;p__Firmicutes;c__Bacilli;o__Lactobacillales;f__Streptococcaceae;g__Lactococcus	94.9	iPHoP-RF;96.40 blast;92.10
C15C_NODE_156_length_20443_cov_14.038492	13.41	d__Bacteria;p__Firmicutes;c__Bacilli;o__Lactobacillales;f__Lactobacillaceae;g__Weissella	93.5	iPHoP-RF;95.40 blast;94.60
C15C_NODE_162_length_19868_cov_1.332557_full	7.98	d__Bacteria;p__Firmicutes;c__Bacilli;o__Lactobacillales;f__Streptococcaceae;g__Lactococcus	95.4	blast;96.80 iPHoP-RF;94.10
C15C_NODE_20_length_117275_cov_2.942790_0_partial	4.78	d__Bacteria;p__Firmicutes;c__Bacilli;o__Lactobacillales;f__Lactobacillaceae;g__Leuconostoc	94.5	blast;96.10 iPHoP-RF;85.70
C15C_NODE_266_length_14469_cov_0.935644	84.23	d__Bacteria;p__Firmicutes;c__Bacilli;o__Lactobacillales;f__Lactobacillaceae;g__Lactiplantibacillus	94.6	blast;96.20 CRISPR;94.50 iPHoP-RF;50.70
C15C_NODE_266_length_14469_cov_0.935644	84.23	d__Bacteria;p__Firmicutes;c__Bacilli;o__Lactobacillales;f__Lactobacillaceae;g__Lacticaseibacillus	91	RaFAH;93.40
C15C_NODE_266_length_14469_cov_0.935644	84.23	d__Bacteria;p__Firmicutes;c__Bacilli;o__Lactobacillales;f__Lactobacillaceae;g__Lactobacillus	91	RaFAH;93.40
C15C_NODE_266_length_14469_cov_0.935644	84.23	d__Bacteria;p__Firmicutes;c__Bacilli;o__Lactobacillales;f__Lactobacillaceae;g__Ligilactobacillus	91	RaFAH;93.40
C15C_NODE_266_length_14469_cov_0.935644	84.23	d__Bacteria;p__Firmicutes;c__Bacilli;o__Lactobacillales;f__Lactobacillaceae;g__Limosilactobacillus	91	RaFAH;93.40
C15C_NODE_276_length_14165_cov_9.089329_1	61.96	d__Bacteria;p__Firmicutes;c__Bacilli;o__Lactobacillales;f__Lactobacillaceae;g__Lactiplantibacillus	97.6	blast;98.30 iPHoP-RF;79.50
C15C_NODE_276_length_14165_cov_9.089329_1	61.96	d__Bacteria;p__Firmicutes;c__Bacilli;o__Lactobacillales;f__Lactobacillaceae;g__Lacticaseibacillus	94.3	RaFAH;96.00
C15C_NODE_276_length_14165_cov_9.089329_1	61.96	d__Bacteria;p__Firmicutes;c__Bacilli;o__Lactobacillales;f__Lactobacillaceae;g__Lactobacillus	94.3	RaFAH;96.00
C15C_NODE_276_length_14165_cov_9.089329_1	61.96	d__Bacteria;p__Firmicutes;c__Bacilli;o__Lactobacillales;f__Lactobacillaceae;g__Ligilactobacillus	94.3	RaFAH;96.00
C15C_NODE_276_length_14165_cov_9.089329_1	61.96	d__Bacteria;p__Firmicutes;c__Bacilli;o__Lactobacillales;f__Lactobacillaceae;g__Limosilactobacillus	94.3	RaFAH;96.00
C15C_NODE_280_length_14077_cov_2.966523	12.31	d__Bacteria;p__Firmicutes;c__Bacilli;o__Lactobacillales;f__Lactobacillaceae;g__Weissella	94.5	blast;96.10 iPHoP-RF;86.00
C15C_NODE_2_length_724735_cov_31.759834_1_partial_1	89.39	d__Bacteria;p__Firmicutes;c__Bacilli;o__Lactobacillales;f__Lactobacillaceae;g__Lacticaseibacillus	98.5	RaFAH;98.90
C15C_NODE_2_length_724735_cov_31.759834_1_partial_1	89.39	d__Bacteria;p__Firmicutes;c__Bacilli;o__Lactobacillales;f__Lactobacillaceae;g__Lactobacillus	98.5	RaFAH;98.90
C15C_NODE_2_length_724735_cov_31.759834_1_partial_1	89.39	d__Bacteria;p__Firmicutes;c__Bacilli;o__Lactobacillales;f__Lactobacillaceae;g__Ligilactobacillus	98.5	RaFAH;98.90
C15C_NODE_2_length_724735_cov_31.759834_1_partial_1	89.39	d__Bacteria;p__Firmicutes;c__Bacilli;o__Lactobacillales;f__Lactobacillaceae;g__Limosilactobacillus	98.5	RaFAH;98.90
C15C_NODE_2_length_724735_cov_31.759834_1_partial_1	89.39	d__Bacteria;p__Firmicutes;c__Bacilli;o__Lactobacillales;f__Lactobacillaceae;g__Lentilactobacillus	94.2	blast;95.90 iPHoP-RF;95.70 CRISPR;52.90
C15C_NODE_478_length_10031_cov_0.766761	18.04	d__Bacteria;p__Firmicutes;c__Bacilli;o__Lactobacillales;f__Lactobacillaceae;g__Lactiplantibacillus	92	blast;94.20 iPHoP-RF;72.80
C2A_NODE_151_length_20865_cov_1.303983	16.29	d__Bacteria;p__Firmicutes;c__Bacilli;o__Lactobacillales;f__Lactobacillaceae;g__Leuconostoc	95.9	iPHoP-RF;97.10 blast;93.90
C2A_NODE_151_length_20865_cov_1.303983	16.29	d__Bacteria;p__Firmicutes;c__Bacilli;o__Lactobacillales;f__Lactobacillaceae;g__Companilactobacillus	91.8	iPHoP-RF;94.10
C2A_NODE_288_length_14252_cov_1.450549	3.3	d__Bacteria;p__Firmicutes;c__Bacilli;o__Lactobacillales;f__Lactobacillaceae;g__Weissella	91.2	blast;93.60
C2A_NODE_288_length_14252_cov_1.450549	3.3	d__Bacteria;p__Proteobacteria;c__Gammaproteobacteria;o__Enterobacterales;f__Alteromonadaceae;g__Pseudoalteromonas	91	iPHoP-RF;93.40
C2A_NODE_349_length_13033_cov_3.792345_full	3.95	d__Bacteria;p__Firmicutes;c__Bacilli;o__Lactobacillales;f__Lactobacillaceae;g__Leuconostoc	95.4	blast;96.80 iPHoP-RF;93.10
C2A_NODE_378_length_12471_cov_0.960467	8.08	d__Bacteria;p__Firmicutes;c__Bacilli;o__Lactobacillales;f__Lactobacillaceae;g__Weissella	90.9	blast;93.30 iPHoP-RF;69.10
C2A_NODE_399_length_12024_cov_16.523157	6.24	d__Bacteria;p__Firmicutes;c__Bacilli;o__Lactobacillales;f__Lactobacillaceae;g__Weissella	90.7	iPHoP-RF;93.10 blast;91.70
C2A_NODE_9_length_109088_cov_8.302778_full_1	28.74	d__Bacteria;p__Firmicutes;c__Bacilli;o__Lactobacillales;f__Lactobacillaceae;g__Weissella	95.2	blast;96.60 iPHoP-RF;77.30
C2A_NODE_9_length_109088_cov_8.302778_full_1	28.74	d__Bacteria;p__Firmicutes;c__Bacilli;o__Lactobacillales;f__Lactobacillaceae;g__Lacticaseibacillus	91.4	RaFAH;93.70
C2A_NODE_9_length_109088_cov_8.302778_full_1	28.74	d__Bacteria;p__Firmicutes;c__Bacilli;o__Lactobacillales;f__Lactobacillaceae;g__Lactobacillus	91.4	RaFAH;93.70
C2A_NODE_9_length_109088_cov_8.302778_full_1	28.74	d__Bacteria;p__Firmicutes;c__Bacilli;o__Lactobacillales;f__Lactobacillaceae;g__Ligilactobacillus	91.4	RaFAH;93.70
C2A_NODE_9_length_109088_cov_8.302778_full_1	28.74	d__Bacteria;p__Firmicutes;c__Bacilli;o__Lactobacillales;f__Lactobacillaceae;g__Limosilactobacillus	91.4	RaFAH;93.70
C2B_NODE_125_length_24045_cov_10.820888	29.22	d__Bacteria;p__Firmicutes;c__Bacilli;o__Lactobacillales;f__Streptococcaceae;g__Lactococcus	95	blast;96.50 iPHoP-RF;94.70
C2B_NODE_125_length_24045_cov_10.820888	29.22	d__Bacteria;p__Firmicutes;c__Bacilli;o__Lactobacillales;f__Streptococcaceae;g__Streptococcus	91.1	RaFAH;79.80 blast;75.40 iPHoP-RF;67.30
C2B_NODE_140_length_22790_cov_1.426643	15.07	d__Bacteria;p__Firmicutes;c__Bacilli;o__Lactobacillales;f__Lactobacillaceae;g__Weissella	93.9	blast;95.70 iPHoP-RF;64.80
C2B_NODE_224_length_16440_cov_13.937351	25.52	d__Bacteria;p__Firmicutes;c__Bacilli;o__Lactobacillales;f__Lactobacillaceae;g__Weissella	94	blast;95.80 iPHoP-RF;94.40
C2B_NODE_224_length_16440_cov_13.937351	25.52	d__Bacteria;p__Firmicutes;c__Bacilli;o__Lactobacillales;f__Lactobacillaceae;g__Lacticaseibacillus	93.1	RaFAH;95.10
C2B_NODE_224_length_16440_cov_13.937351	25.52	d__Bacteria;p__Firmicutes;c__Bacilli;o__Lactobacillales;f__Lactobacillaceae;g__Lactobacillus	93.1	RaFAH;95.10
C2B_NODE_224_length_16440_cov_13.937351	25.52	d__Bacteria;p__Firmicutes;c__Bacilli;o__Lactobacillales;f__Lactobacillaceae;g__Ligilactobacillus	93.1	RaFAH;95.10
C2B_NODE_224_length_16440_cov_13.937351	25.52	d__Bacteria;p__Firmicutes;c__Bacilli;o__Lactobacillales;f__Lactobacillaceae;g__Limosilactobacillus	93.1	RaFAH;95.10
C2B_NODE_347_length_12620_cov_3.667414_full	14.7	d__Bacteria;p__Firmicutes;c__Bacilli;o__Lactobacillales;f__Streptococcaceae;g__Lactococcus	95.3	blast;96.70 iPHoP-RF;51.50
C2B_NODE_36_length_47053_cov_4.738759_full_1	22.45	d__Bacteria;p__Firmicutes;c__Bacilli;o__Lactobacillales;f__Lactobacillaceae;g__Weissella	95	blast;96.50 iPHoP-RF;79.00
C2B_NODE_451_length_10673_cov_2.675517_full	3.82	d__Bacteria;p__Firmicutes;c__Bacilli;o__Lactobacillales;f__Lactobacillaceae;g__Weissella	93.6	blast;95.50 iPHoP-RF;86.70
C2B_NODE_502_length_10118_cov_2.648884	11.41	d__Bacteria;p__Firmicutes;c__Bacilli;o__Lactobacillales;f__Lactobacillaceae;g__Weissella	91.4	blast;93.70 iPHoP-RF;59.80
C2B_NODE_89_length_29067_cov_1.172564	18.78	d__Bacteria;p__Firmicutes;c__Bacilli;o__Lactobacillales;f__Lactobacillaceae;g__Leuconostoc	95.3	CRISPR;96.70 blast;96.50 iPHoP-RF;93.40
C2C_NODE_194_length_16880_cov_1.535367	66.29	d__Bacteria;p__Firmicutes;c__Bacilli;o__Lactobacillales;f__Streptococcaceae;g__Lactococcus	95.4	blast;94.80 iPHoP-RF;91.10 RaFAH;69.60
C2C_NODE_276_length_13888_cov_8.876535	8.86	d__Bacteria;p__Firmicutes;c__Bacilli;o__Lactobacillales;f__Lactobacillaceae;g__Leuconostoc	94.2	blast;95.90 iPHoP-RF;92.80
C2C_NODE_410_length_11475_cov_17.766567	1.89	d__Bacteria;p__Firmicutes;c__Bacilli;o__Lactobacillales;f__Lactobacillaceae;g__Leuconostoc	95.2	blast;96.60 iPHoP-RF;75.70
C2C_NODE_438_length_11187_cov_7.431917	22.26	d__Bacteria;p__Firmicutes;c__Bacilli;o__Lactobacillales;f__Streptococcaceae;g__Lactococcus	92.9	blast;94.90 iPHoP-RF;92.40
C2C_NODE_82_length_30459_cov_1.717097	48.8	d__Bacteria;p__Firmicutes;c__Bacilli;o__Lactobacillales;f__Lactobacillaceae;g__Leuconostoc	95.3	CRISPR;96.70 blast;96.50 iPHoP-RF;95.70
C40A_NODE_15_length_149055_cov_20.127041_full_1	12.72	d__Bacteria;p__Firmicutes;c__Bacilli;o__Lactobacillales;f__Lactobacillaceae;g__Lentilactobacillus	97.5	CRISPR;98.20 iPHoP-RF;94.40 blast;93.60
C40A_NODE_15_length_149055_cov_20.127041_full_1	12.72	d__Bacteria;p__Firmicutes;c__Bacilli;o__Lactobacillales;f__Lactobacillaceae;g__Lacticaseibacillus	96.6	RaFAH;97.60
C40A_NODE_15_length_149055_cov_20.127041_full_1	12.72	d__Bacteria;p__Firmicutes;c__Bacilli;o__Lactobacillales;f__Lactobacillaceae;g__Lactobacillus	96.6	RaFAH;97.60
C40A_NODE_15_length_149055_cov_20.127041_full_1	12.72	d__Bacteria;p__Firmicutes;c__Bacilli;o__Lactobacillales;f__Lactobacillaceae;g__Ligilactobacillus	96.6	RaFAH;97.60
C40A_NODE_15_length_149055_cov_20.127041_full_1	12.72	d__Bacteria;p__Firmicutes;c__Bacilli;o__Lactobacillales;f__Lactobacillaceae;g__Limosilactobacillus	96.6	RaFAH;97.60
C40A_NODE_176_length_19785_cov_1.611049	41.97	d__Bacteria;p__Firmicutes;c__Bacilli;o__Lactobacillales;f__Lactobacillaceae;g__Lactobacillus	100	RaFAH;98.10 CRISPR;97.60 iPHoP-RF;97.10 blast;92.60
C40A_NODE_176_length_19785_cov_1.611049	41.97	d__Bacteria;p__Firmicutes;c__Bacilli;o__Lactobacillales;f__Lactobacillaceae;g__Lacticaseibacillus	97.3	RaFAH;98.10
C40A_NODE_176_length_19785_cov_1.611049	41.97	d__Bacteria;p__Firmicutes;c__Bacilli;o__Lactobacillales;f__Lactobacillaceae;g__Ligilactobacillus	97.3	RaFAH;98.10
C40A_NODE_176_length_19785_cov_1.611049	41.97	d__Bacteria;p__Firmicutes;c__Bacilli;o__Lactobacillales;f__Lactobacillaceae;g__Limosilactobacillus	97.3	RaFAH;98.10
C40A_NODE_297_length_13929_cov_1.374801	39.07	d__Bacteria;p__Proteobacteria;c__Gammaproteobacteria;o__Enterobacterales;f__Enterobacteriaceae;g__Pantoea	91.1	blast;93.50 iPHoP-RF;76.40
C40A_NODE_321_length_13433_cov_1.957613	40.76	d__Bacteria;p__Proteobacteria;c__Gammaproteobacteria;o__Enterobacterales;f__Enterobacteriaceae;g__Escherichia	90.3	iPHoP-RF;92.80
C40A_NODE_324_length_13335_cov_1.236599	35.98	d__Bacteria;p__Proteobacteria;c__Gammaproteobacteria;o__Enterobacterales;f__Enterobacteriaceae;g__Escherichia	91.4	iPHoP-RF;93.70
C40A_NODE_341_length_13029_cov_1.512324	9.74	d__Bacteria;p__Firmicutes;c__Bacilli;o__Lactobacillales;f__Lactobacillaceae;g__Weissella	90	blast;92.50 iPHoP-RF;83.60
C40A_NODE_370_length_12488_cov_3.290349	44.87	d__Bacteria;p__Firmicutes_A;c__Clostridia;o__Clostridiales;f__Clostridiaceae;g__Clostridium_B	95	blast;96.50 iPHoP-RF;83.90
C40A_NODE_437_length_11382_cov_1.282097	20.24	d__Bacteria;p__Firmicutes;c__Bacilli;o__Lactobacillales;f__Streptococcaceae;g__Lactococcus	95.9	blast;97.10 iPHoP-RF;94.70
C40A_NODE_446_length_11339_cov_1.609882	54.2	d__Bacteria;p__Firmicutes;c__Bacilli;o__Lactobacillales;f__Lactobacillaceae;g__Lactiplantibacillus	97.5	blast;98.20 iPHoP-RF;77.50 CRISPR;55.90
C40A_NODE_517_length_10311_cov_2.897192	5.49	d__Bacteria;p__Firmicutes;c__Bacilli;o__Lactobacillales;f__Lactobacillaceae;g__Weissella	94.5	blast;96.10 iPHoP-RF;79.80
C40A_NODE_72_length_44446_cov_3.724994	86.11	d__Bacteria;p__Firmicutes;c__Bacilli;o__Lactobacillales;f__Streptococcaceae;g__Lactococcus	99.3	blast;96.80 CRISPR;96.70 iPHoP-RF;94.10 RaFAH;90.30
C40B_NODE_236_length_13087_cov_3.465432	6.83	d__Bacteria;p__Firmicutes;c__Bacilli;o__Lactobacillales;f__Lactobacillaceae;g__Weissella	91.6	blast;93.90 iPHoP-RF;90.80
C40B_NODE_297_length_11220_cov_1.744343	10.06	d__Bacteria;p__Firmicutes;c__Bacilli;o__Lactobacillales;f__Lactobacillaceae;g__Weissella	90.4	blast;92.90 iPHoP-RF;69.30
C40B_NODE_74_length_27901_cov_1.480449_0_partial	21.29	d__Bacteria;p__Firmicutes;c__Bacilli;o__Lactobacillales;f__Lactobacillaceae;g__Leuconostoc	92.2	blast;94.40 iPHoP-RF;90.10
C40C_NODE_103_length_33924_cov_5.073912	50.19	d__Bacteria;p__Firmicutes_A;c__Clostridia;o__Clostridiales;f__Clostridiaceae;g__Clostridium_B	95.3	blast;96.70 iPHoP-RF;94.40
C40C_NODE_108_length_33034_cov_2.202632	25.14	d__Bacteria;p__Firmicutes;c__Bacilli;o__Lactobacillales;f__Lactobacillaceae;g__Weissella	93.6	blast;95.50 iPHoP-RF;90.80
C40C_NODE_121_length_28843_cov_3.998677_1	33.09	d__Bacteria;p__Firmicutes;c__Bacilli;o__Lactobacillales;f__Streptococcaceae;g__Lactococcus	96.9	blast;97.80 iPHoP-RF;95.70
C40C_NODE_122_length_28549_cov_1.615685	15.4	d__Bacteria;p__Firmicutes;c__Bacilli;o__Lactobacillales;f__Lactobacillaceae;g__Lacticaseibacillus	98.2	RaFAH;98.70
C40C_NODE_122_length_28549_cov_1.615685	15.4	d__Bacteria;p__Firmicutes;c__Bacilli;o__Lactobacillales;f__Lactobacillaceae;g__Lactobacillus	98.2	RaFAH;98.70
C40C_NODE_122_length_28549_cov_1.615685	15.4	d__Bacteria;p__Firmicutes;c__Bacilli;o__Lactobacillales;f__Lactobacillaceae;g__Ligilactobacillus	98.2	RaFAH;98.70
C40C_NODE_122_length_28549_cov_1.615685	15.4	d__Bacteria;p__Firmicutes;c__Bacilli;o__Lactobacillales;f__Lactobacillaceae;g__Limosilactobacillus	98.2	RaFAH;98.70
C40C_NODE_122_length_28549_cov_1.615685	15.4	d__Bacteria;p__Firmicutes;c__Bacilli;o__Lactobacillales;f__Lactobacillaceae;g__Loigolactobacillus	96.3	CRISPR;97.40
C40C_NODE_122_length_28549_cov_1.615685	15.4	d__Bacteria;p__Firmicutes;c__Bacilli;o__Lactobacillales;f__Lactobacillaceae;g__Lactiplantibacillus	95.6	blast;96.90 iPHoP-RF;84.20 CRISPR;50.40
C40C_NODE_173_length_20720_cov_1.447045	53	d__Bacteria;p__Proteobacteria;c__Gammaproteobacteria;o__Enterobacterales;f__Enterobacteriaceae;g__Erwinia	91.5	blast;93.80 iPHoP-RF;83.60 CRISPR;63.20
C40C_NODE_173_length_20720_cov_1.447045	53	d__Bacteria;p__Proteobacteria;c__Gammaproteobacteria;o__Enterobacterales;f__Enterobacteriaceae;g__Escherichia	90.7	iPHoP-RF;93.10
C40C_NODE_219_length_16901_cov_5.167998	43.08	d__Bacteria;p__Firmicutes_A;c__Clostridia;o__Clostridiales;f__Clostridiaceae;g__Clostridium_B	91.4	blast;93.70 iPHoP-RF;75.40
C40C_NODE_229_length_16587_cov_2.066768	58.68	d__Bacteria;p__Firmicutes;c__Bacilli;o__Lactobacillales;f__Lactobacillaceae;g__Lactiplantibacillus	95.9	blast;97.10 iPHoP-RF;74.10
C40C_NODE_271_length_14858_cov_0.976241	75.59	d__Bacteria;p__Firmicutes;c__Bacilli;o__Lactobacillales;f__Lactobacillaceae;g__Levilactobacillus	93.2	blast;95.20 iPHoP-RF;85.40
C40C_NODE_316_length_13436_cov_1.245849	18.58	d__Bacteria;p__Proteobacteria;c__Gammaproteobacteria;o__Enterobacterales;f__Enterobacteriaceae;g__Pantoea	90.3	blast;92.80 iPHoP-RF;92.80
C40C_NODE_359_length_12282_cov_1.333114	98.79	d__Bacteria;p__Firmicutes;c__Bacilli;o__Lactobacillales;f__Lactobacillaceae;g__Lactiplantibacillus	94.7	blast;96.30 iPHoP-RF;80.60
C40C_NODE_466_length_10593_cov_1.811389	50.86	d__Bacteria;p__Proteobacteria;c__Gammaproteobacteria;o__Enterobacterales;f__Enterobacteriaceae;g__Chania	95.9	iPHoP-RF;97.10
C40C_NODE_466_length_10593_cov_1.811389	50.86	d__Bacteria;p__Proteobacteria;c__Gammaproteobacteria;o__Enterobacterales;f__Enterobacteriaceae;g__Escherichia	95.9	iPHoP-RF;97.10
C40C_NODE_466_length_10593_cov_1.811389	50.86	d__Bacteria;p__Proteobacteria;c__Gammaproteobacteria;o__Enterobacterales;f__Enterobacteriaceae;g__Yersinia	95.9	iPHoP-RF;97.10
C40C_NODE_466_length_10593_cov_1.811389	50.86	d__Bacteria;p__Proteobacteria;c__Gammaproteobacteria;o__Enterobacterales;f__Enterobacteriaceae;g__Xenorhabdus	95.3	iPHoP-RF;96.70
C40C_NODE_466_length_10593_cov_1.811389	50.86	d__Bacteria;p__Proteobacteria;c__Gammaproteobacteria;o__Enterobacterales;f__Enterobacteriaceae;g__Citrobacter	94.9	iPHoP-RF;96.40
C40C_NODE_466_length_10593_cov_1.811389	50.86	d__Bacteria;p__Proteobacteria;c__Gammaproteobacteria;o__Enterobacterales;f__Enterobacteriaceae;g__Serratia	94.9	iPHoP-RF;96.40
C40C_NODE_466_length_10593_cov_1.811389	50.86	d__Bacteria;p__Proteobacteria;c__Gammaproteobacteria;o__Enterobacterales;f__Enterobacteriaceae;g__Ewingella	94.5	iPHoP-RF;96.10
C40C_NODE_466_length_10593_cov_1.811389	50.86	d__Bacteria;p__Proteobacteria;c__Gammaproteobacteria;o__Enterobacterales;f__Enterobacteriaceae;g__Pantoea	94.5	iPHoP-RF;96.10
C40C_NODE_466_length_10593_cov_1.811389	50.86	d__Bacteria;p__Proteobacteria;c__Gammaproteobacteria;o__Enterobacterales;f__Enterobacteriaceae;g__Rouxiella	93.9	iPHoP-RF;95.70
C40C_NODE_466_length_10593_cov_1.811389	50.86	d__Bacteria;p__Proteobacteria;c__Gammaproteobacteria;o__Enterobacterales;f__Enterobacteriaceae;g__RHBSTW-00994	92.6	iPHoP-RF;94.70
C40C_NODE_466_length_10593_cov_1.811389	50.86	d__Bacteria;p__Proteobacteria;c__Gammaproteobacteria;o__Enterobacterales;f__Enterobacteriaceae;g__Edaphovirga	92.2	iPHoP-RF;94.40
C40C_NODE_466_length_10593_cov_1.811389	50.86	d__Bacteria;p__Proteobacteria;c__Gammaproteobacteria;o__Enterobacterales;f__Enterobacteriaceae;g__Limnobaculum	91.4	iPHoP-RF;93.70
C40C_NODE_466_length_10593_cov_1.811389	50.86	d__Bacteria;p__Proteobacteria;c__Gammaproteobacteria;o__Enterobacterales;f__Enterobacteriaceae;g__Photorhabdus	91	iPHoP-RF;93.40
C4A_NODE_161_length_20719_cov_1.028700	20.26	d__Bacteria;p__Firmicutes;c__Bacilli;o__Lactobacillales;f__Streptococcaceae;g__Lactococcus	91.8	iPHoP-RF;94.10 blast;93.90
C4A_NODE_299_length_14835_cov_2.529032	16.24	d__Bacteria;p__Firmicutes;c__Bacilli;o__Lactobacillales;f__Streptococcaceae;g__Lactococcus	96.9	blast;97.80 iPHoP-RF;80.00
C4A_NODE_301_length_14830_cov_4.368428	56.11	d__Bacteria;p__Firmicutes;c__Bacilli;o__Lactobacillales;f__Lactobacillaceae;g__Weissella	91.2	blast;93.60 iPHoP-RF;80.60
C4A_NODE_324_length_14089_cov_7.333978	21.82	d__Bacteria;p__Firmicutes;c__Bacilli;o__Lactobacillales;f__Streptococcaceae;g__Lactococcus	99	blast;96.20 iPHoP-RF;96.10 RaFAH;89.10
C4A_NODE_429_length_12019_cov_0.881349	17.18	d__Bacteria;p__Firmicutes;c__Bacilli;o__Lactobacillales;f__Streptococcaceae;g__Lactococcus	96.4	blast;97.50 iPHoP-RF;86.70
C4A_NODE_431_length_11952_cov_2.213953	5.55	d__Bacteria;p__Firmicutes;c__Bacilli;o__Lactobacillales;f__Lactobacillaceae;g__Lacticaseibacillus	98.5	RaFAH;98.90
C4A_NODE_431_length_11952_cov_2.213953	5.55	d__Bacteria;p__Firmicutes;c__Bacilli;o__Lactobacillales;f__Lactobacillaceae;g__Lactobacillus	98.5	RaFAH;98.90
C4A_NODE_431_length_11952_cov_2.213953	5.55	d__Bacteria;p__Firmicutes;c__Bacilli;o__Lactobacillales;f__Lactobacillaceae;g__Ligilactobacillus	98.5	RaFAH;98.90
C4A_NODE_431_length_11952_cov_2.213953	5.55	d__Bacteria;p__Firmicutes;c__Bacilli;o__Lactobacillales;f__Lactobacillaceae;g__Limosilactobacillus	98.5	RaFAH;98.90
C4A_NODE_447_length_11609_cov_11.594409	4.87	d__Bacteria;p__Firmicutes;c__Bacilli;o__Lactobacillales;f__Streptococcaceae;g__Lactococcus	95.4	blast;96.80 iPHoP-RF;77.30
C4A_NODE_517_length_10747_cov_3.789454	7.86	d__Bacteria;p__Firmicutes;c__Bacilli;o__Lactobacillales;f__Lactobacillaceae;g__Lacticaseibacillus	98.5	RaFAH;98.90
C4A_NODE_517_length_10747_cov_3.789454	7.86	d__Bacteria;p__Firmicutes;c__Bacilli;o__Lactobacillales;f__Lactobacillaceae;g__Lactobacillus	98.5	RaFAH;98.90
C4A_NODE_517_length_10747_cov_3.789454	7.86	d__Bacteria;p__Firmicutes;c__Bacilli;o__Lactobacillales;f__Lactobacillaceae;g__Ligilactobacillus	98.5	RaFAH;98.90
C4A_NODE_517_length_10747_cov_3.789454	7.86	d__Bacteria;p__Firmicutes;c__Bacilli;o__Lactobacillales;f__Lactobacillaceae;g__Limosilactobacillus	98.5	RaFAH;98.90
C4A_NODE_517_length_10747_cov_3.789454	7.86	d__Bacteria;p__Firmicutes;c__Bacilli;o__Lactobacillales;f__Lactobacillaceae;g__Weissella	92.7	blast;94.80 iPHoP-RF;70.90
C4A_NODE_542_length_10478_cov_2.009951_full	10.39	d__Bacteria;p__Proteobacteria;c__Gammaproteobacteria;o__Enterobacterales;f__Enterobacteriaceae;g__Pantoea	91.6	blast;93.90 iPHoP-RF;92.40
C4A_NODE_546_length_10455_cov_0.840046	10.29	d__Bacteria;p__Proteobacteria;c__Gammaproteobacteria;o__Enterobacterales;f__Enterobacteriaceae;g__Erwinia	92.2	RaFAH;94.40
C4A_NODE_546_length_10455_cov_0.840046	10.29	d__Bacteria;p__Proteobacteria;c__Gammaproteobacteria;o__Enterobacterales;f__Enterobacteriaceae;g__Ewingella	91	iPHoP-RF;93.40
C4A_NODE_546_length_10455_cov_0.840046	10.29	d__Bacteria;p__Proteobacteria;c__Gammaproteobacteria;o__Enterobacterales;f__Enterobacteriaceae;g__Pectobacterium	91	iPHoP-RF;93.40
C4A_NODE_546_length_10455_cov_0.840046	10.29	d__Bacteria;p__Proteobacteria;c__Gammaproteobacteria;o__Enterobacterales;f__Enterobacteriaceae;g__Superficieibacter	91	iPHoP-RF;93.40
C4A_NODE_546_length_10455_cov_0.840046	10.29	d__Bacteria;p__Proteobacteria;c__Gammaproteobacteria;o__Enterobacterales;f__Enterobacteriaceae;g__Leminorella	90.7	iPHoP-RF;93.10
C4A_NODE_546_length_10455_cov_0.840046	10.29	d__Bacteria;p__Proteobacteria;c__Gammaproteobacteria;o__Enterobacterales;f__Enterobacteriaceae;g__Escherichia	90.3	iPHoP-RF;92.80
C4A_NODE_90_length_27574_cov_1.395708_1	26.84	d__Bacteria;p__Firmicutes;c__Bacilli;o__Lactobacillales;f__Streptococcaceae;g__Lactococcus	93.6	blast;95.50 iPHoP-RF;92.80
C4A_NODE_90_length_27574_cov_1.395708_1	26.84	d__Bacteria;p__Firmicutes;c__Bacilli;o__Lactobacillales;f__Streptococcaceae;g__Streptococcus	91.6	RaFAH;87.80 iPHoP-RF;75.20
C4A_NODE_94_length_26946_cov_20.324956	31.27	d__Bacteria;p__Firmicutes;c__Bacilli;o__Lactobacillales;f__Streptococcaceae;g__Lactococcus	94.7	blast;96.30 iPHoP-RF;90.80
C4B_NODE_112_length_22147_cov_1.638692	27.58	d__Bacteria;p__Proteobacteria;c__Gammaproteobacteria;o__Enterobacterales;f__Enterobacteriaceae;g__Escherichia	91.4	iPHoP-RF;93.70
C4B_NODE_163_length_17595_cov_1.339707	29.37	d__Bacteria;p__Firmicutes;c__Bacilli;o__Lactobacillales;f__Streptococcaceae;g__Lactococcus	99	blast;96.40 iPHoP-RF;94.10 RaFAH;89.10
C4B_NODE_405_length_11071_cov_1.776681	43.9	d__Bacteria;p__Firmicutes;c__Bacilli;o__Lactobacillales;f__Streptococcaceae;g__Lactococcus	92.1	blast;94.30 iPHoP-RF;90.50
C4B_NODE_415_length_10937_cov_1.235338	19.25	d__Bacteria;p__Firmicutes;c__Bacilli;o__Lactobacillales;f__Streptococcaceae;g__Lactococcus	94.5	iPHoP-RF;96.10 blast;95.90
C4B_NODE_461_length_10445_cov_1.033824	39.83	d__Bacteria;p__Firmicutes;c__Bacilli;o__Lactobacillales;f__Streptococcaceae;g__Lactococcus	92.5	blast;94.60 iPHoP-RF;83.60
C4B_NODE_481_length_10229_cov_1.152940	86.42	d__Bacteria;p__Firmicutes;c__Bacilli;o__Lactobacillales;f__Streptococcaceae;g__Lactococcus	98.5	blast;98.90 iPHoP-RF;94.40
C4C_NODE_138_length_26640_cov_6.889450	11.78	d__Bacteria;p__Firmicutes;c__Bacilli;o__Lactobacillales;f__Lactobacillaceae;g__Lacticaseibacillus	97.2	RaFAH;98.00
C4C_NODE_138_length_26640_cov_6.889450	11.78	d__Bacteria;p__Firmicutes;c__Bacilli;o__Lactobacillales;f__Lactobacillaceae;g__Lactobacillus	97.2	RaFAH;98.00
C4C_NODE_138_length_26640_cov_6.889450	11.78	d__Bacteria;p__Firmicutes;c__Bacilli;o__Lactobacillales;f__Lactobacillaceae;g__Ligilactobacillus	97.2	RaFAH;98.00
C4C_NODE_138_length_26640_cov_6.889450	11.78	d__Bacteria;p__Firmicutes;c__Bacilli;o__Lactobacillales;f__Lactobacillaceae;g__Limosilactobacillus	97.2	RaFAH;98.00
C4C_NODE_138_length_26640_cov_6.889450	11.78	d__Bacteria;p__Firmicutes;c__Bacilli;o__Lactobacillales;f__Lactobacillaceae;g__Weissella	92.3	blast;94.50 iPHoP-RF;88.50
C4C_NODE_216_length_18946_cov_9.986662	9.74	d__Bacteria;p__Firmicutes;c__Bacilli;o__Lactobacillales;f__Lactobacillaceae;g__Lacticaseibacillus	97.8	RaFAH;98.40
C4C_NODE_216_length_18946_cov_9.986662	9.74	d__Bacteria;p__Firmicutes;c__Bacilli;o__Lactobacillales;f__Lactobacillaceae;g__Lactobacillus	97.8	RaFAH;98.40
C4C_NODE_216_length_18946_cov_9.986662	9.74	d__Bacteria;p__Firmicutes;c__Bacilli;o__Lactobacillales;f__Lactobacillaceae;g__Ligilactobacillus	97.8	RaFAH;98.40
C4C_NODE_216_length_18946_cov_9.986662	9.74	d__Bacteria;p__Firmicutes;c__Bacilli;o__Lactobacillales;f__Lactobacillaceae;g__Limosilactobacillus	97.8	RaFAH;98.40
C4C_NODE_216_length_18946_cov_9.986662	9.74	d__Bacteria;p__Firmicutes;c__Bacilli;o__Lactobacillales;f__Lactobacillaceae;g__Weissella	92.5	blast;94.60 iPHoP-RF;89.80
C4C_NODE_257_length_17445_cov_6.970955	15.95	d__Bacteria;p__Firmicutes;c__Bacilli;o__Lactobacillales;f__Streptococcaceae;g__Lactococcus	96.2	blast;97.30 iPHoP-RF;88.90
C4C_NODE_258_length_17407_cov_2.554514	7.49	d__Bacteria;p__Firmicutes;c__Bacilli;o__Lactobacillales;f__Lactobacillaceae;g__Lacticaseibacillus	96.2	RaFAH;97.30
C4C_NODE_258_length_17407_cov_2.554514	7.49	d__Bacteria;p__Firmicutes;c__Bacilli;o__Lactobacillales;f__Lactobacillaceae;g__Lactobacillus	96.2	RaFAH;97.30
C4C_NODE_258_length_17407_cov_2.554514	7.49	d__Bacteria;p__Firmicutes;c__Bacilli;o__Lactobacillales;f__Lactobacillaceae;g__Ligilactobacillus	96.2	RaFAH;97.30
C4C_NODE_258_length_17407_cov_2.554514	7.49	d__Bacteria;p__Firmicutes;c__Bacilli;o__Lactobacillales;f__Lactobacillaceae;g__Limosilactobacillus	96.2	RaFAH;97.30
C4C_NODE_258_length_17407_cov_2.554514	7.49	d__Bacteria;p__Firmicutes;c__Bacilli;o__Lactobacillales;f__Lactobacillaceae;g__Weissella	91.4	blast;93.70 iPHoP-RF;64.00
C4C_NODE_32_length_60613_cov_1.667460_full_1	26.07	d__Bacteria;p__Firmicutes;c__Bacilli;o__Lactobacillales;f__Lactobacillaceae;g__Lactiplantibacillus	95.4	CRISPR;96.80 blast;96.80 iPHoP-RF;80.80
C4C_NODE_32_length_60613_cov_1.667460_full_1	26.07	d__Bacteria;p__Firmicutes;c__Bacilli;o__Lactobacillales;f__Lactobacillaceae;g__Lacticaseibacillus	93.1	RaFAH;95.10
C4C_NODE_32_length_60613_cov_1.667460_full_1	26.07	d__Bacteria;p__Firmicutes;c__Bacilli;o__Lactobacillales;f__Lactobacillaceae;g__Lactobacillus	93.1	RaFAH;95.10
C4C_NODE_32_length_60613_cov_1.667460_full_1	26.07	d__Bacteria;p__Firmicutes;c__Bacilli;o__Lactobacillales;f__Lactobacillaceae;g__Ligilactobacillus	93.1	RaFAH;95.10
C4C_NODE_32_length_60613_cov_1.667460_full_1	26.07	d__Bacteria;p__Firmicutes;c__Bacilli;o__Lactobacillales;f__Lactobacillaceae;g__Limosilactobacillus	93.1	RaFAH;95.10
C4C_NODE_503_length_11531_cov_5.594879	9.29	d__Bacteria;p__Firmicutes;c__Bacilli;o__Lactobacillales;f__Streptococcaceae;g__Lactococcus	95.3	blast;96.70 iPHoP-RF;64.30
C4C_NODE_614_length_10359_cov_6.929828	21.33	d__Bacteria;p__Firmicutes;c__Bacilli;o__Lactobacillales;f__Lactobacillaceae;g__Weissella	90.9	blast;93.30 iPHoP-RF;68.20
C8A_NODE_190_length_22270_cov_1.441042	52.24	d__Bacteria;p__Firmicutes;c__Bacilli;o__Lactobacillales;f__Lactobacillaceae;g__Levilactobacillus	96	CRISPR;97.20 blast;96.20 iPHoP-RF;82.80
C8A_NODE_190_length_22270_cov_1.441042	52.24	d__Bacteria;p__Firmicutes;c__Bacilli;o__Lactobacillales;f__Lactobacillaceae;g__Lacticaseibacillus	95.4	RaFAH;96.80
C8A_NODE_190_length_22270_cov_1.441042	52.24	d__Bacteria;p__Firmicutes;c__Bacilli;o__Lactobacillales;f__Lactobacillaceae;g__Lactobacillus	95.4	RaFAH;96.80
C8A_NODE_190_length_22270_cov_1.441042	52.24	d__Bacteria;p__Firmicutes;c__Bacilli;o__Lactobacillales;f__Lactobacillaceae;g__Ligilactobacillus	95.4	RaFAH;96.80
C8A_NODE_190_length_22270_cov_1.441042	52.24	d__Bacteria;p__Firmicutes;c__Bacilli;o__Lactobacillales;f__Lactobacillaceae;g__Limosilactobacillus	95.4	RaFAH;96.80
C8A_NODE_190_length_22270_cov_1.441042	52.24	d__Bacteria;p__Firmicutes;c__Bacilli;o__Lactobacillales;f__Lactobacillaceae;g__Secundilactobacillus	92.2	CRISPR;94.40
C8A_NODE_232_length_20059_cov_2.810706	21.69	d__Bacteria;p__Firmicutes;c__Bacilli;o__Lactobacillales;f__Lactobacillaceae;g__Leuconostoc	96.4	CRISPR;97.50 iPHoP-RF;96.10 blast;95.50
C8A_NODE_260_length_18562_cov_2.800054_1	26.14	d__Bacteria;p__Firmicutes;c__Bacilli;o__Lactobacillales;f__Lactobacillaceae;g__Leuconostoc	92.6	blast;94.70 CRISPR;92.30 iPHoP-RF;84.50
C8A_NODE_276_length_17811_cov_0.874689	23.43	d__Bacteria;p__Firmicutes;c__Bacilli;o__Lactobacillales;f__Lactobacillaceae;g__Leuconostoc	93.4	blast;95.30 iPHoP-RF;94.70
C8A_NODE_280_length_17466_cov_9.071227	59.22	d__Bacteria;p__Firmicutes;c__Bacilli;o__Lactobacillales;f__Streptococcaceae;g__Lactococcus	94.6	blast;95.80 iPHoP-RF;86.70 RaFAH;54.60
C8A_NODE_33_length_66532_cov_30.567036_full_1	18.9	d__Bacteria;p__Firmicutes;c__Bacilli;o__Lactobacillales;f__Lactobacillaceae;g__Leuconostoc	95.9	iPHoP-RF;97.10 CRISPR;96.80 blast;96.30
C8A_NODE_366_length_14898_cov_0.958771	57.52	d__Bacteria;p__Proteobacteria;c__Gammaproteobacteria;o__Enterobacterales;f__Enterobacteriaceae;g__Pantoea	93.6	blast;95.50 iPHoP-RF;92.10
C8A_NODE_414_length_13876_cov_1.554440	16.31	d__Bacteria;p__Firmicutes;c__Bacilli;o__Lactobacillales;f__Lactobacillaceae;g__Levilactobacillus	91.6	blast;93.90 iPHoP-RF;58.70
C8A_NODE_487_length_12726_cov_0.872450	80.38	d__Bacteria;p__Firmicutes;c__Bacilli;o__Lactobacillales;f__Streptococcaceae;g__Lactococcus	94.3	blast;96.00 iPHoP-RF;89.80
C8A_NODE_573_length_11507_cov_1.761424	12.03	d__Bacteria;p__Firmicutes;c__Bacilli;o__Lactobacillales;f__Lactobacillaceae;g__Lacticaseibacillus	99.4	RaFAH;99.50
C8A_NODE_573_length_11507_cov_1.761424	12.03	d__Bacteria;p__Firmicutes;c__Bacilli;o__Lactobacillales;f__Lactobacillaceae;g__Lactobacillus	99.4	RaFAH;99.50
C8A_NODE_573_length_11507_cov_1.761424	12.03	d__Bacteria;p__Firmicutes;c__Bacilli;o__Lactobacillales;f__Lactobacillaceae;g__Ligilactobacillus	99.4	RaFAH;99.50
C8A_NODE_573_length_11507_cov_1.761424	12.03	d__Bacteria;p__Firmicutes;c__Bacilli;o__Lactobacillales;f__Lactobacillaceae;g__Limosilactobacillus	99.4	RaFAH;99.50
C8A_NODE_573_length_11507_cov_1.761424	12.03	d__Bacteria;p__Firmicutes;c__Bacilli;o__Lactobacillales;f__Lactobacillaceae;g__Weissella	90.9	blast;93.30 iPHoP-RF;76.80
C8A_NODE_610_length_11082_cov_1.564217	43.29	d__Bacteria;p__Proteobacteria;c__Gammaproteobacteria;o__Enterobacterales;f__Enterobacteriaceae;g__Erwinia	99.3	RaFAH;94.90 iPHoP-RF;94.10
C8A_NODE_610_length_11082_cov_1.564217	43.29	d__Bacteria;p__Proteobacteria;c__Gammaproteobacteria;o__Enterobacterales;f__Enterobacteriaceae;g__Pragia	92.2	iPHoP-RF;94.40
C8A_NODE_610_length_11082_cov_1.564217	43.29	d__Bacteria;p__Proteobacteria;c__Gammaproteobacteria;o__Enterobacterales;f__Enterobacteriaceae;g__Limnobaculum	90.3	iPHoP-RF;92.80
C8A_NODE_701_length_10266_cov_9.885886	4.52	d__Bacteria;p__Firmicutes;c__Bacilli;o__Lactobacillales;f__Streptococcaceae;g__Lactococcus	96.3	blast;97.40 iPHoP-RF;87.30
C8A_NODE_97_length_33743_cov_19.339481	7.83	d__Bacteria;p__Firmicutes;c__Bacilli;o__Lactobacillales;f__Streptococcaceae;g__Lactococcus	98.1	blast;98.60 iPHoP-RF;96.40
C8B_NODE_123_length_29759_cov_7.274332	98.01	d__Bacteria;p__Firmicutes;c__Bacilli;o__Lactobacillales;f__Streptococcaceae;g__Lactococcus	98.2	blast;96.80 iPHoP-RF;89.80 RaFAH;79.10 CRISPR;71.70
C8B_NODE_263_length_17809_cov_4.638276_full	5.07	d__Bacteria;p__Firmicutes;c__Bacilli;o__Lactobacillales;f__Lactobacillaceae;g__Lactiplantibacillus	94.7	blast;96.30 iPHoP-RF;83.10
C8B_NODE_576_length_10622_cov_1.413626	4.17	d__Bacteria;p__Firmicutes;c__Bacilli;o__Lactobacillales;f__Lactobacillaceae;g__Weissella	90.9	blast;93.30 iPHoP-RF;92.80
C8B_NODE_87_length_37876_cov_2.718562_1	34.47	d__Bacteria;p__Firmicutes;c__Bacilli;o__Lactobacillales;f__Streptococcaceae;g__Lactococcus	95.9	iPHoP-RF;97.10 blast;96.10
C8C_NODE_194_length_20689_cov_1.376228	94.37	d__Bacteria;p__Proteobacteria;c__Gammaproteobacteria;o__Enterobacterales;f__Enterobacteriaceae;g__Pantoea	90.2	blast;92.70 iPHoP-RF;84.50
C8C_NODE_44_length_70873_cov_9.149846_full_1	66.27	d__Bacteria;p__Firmicutes;c__Bacilli;o__Lactobacillales;f__Lactobacillaceae;g__Lactiplantibacillus	95.2	blast;96.60 iPHoP-RF;81.60 CRISPR;54.00
C8C_NODE_530_length_10663_cov_1.485383	13.01	d__Bacteria;p__Firmicutes;c__Bacilli;o__Lactobacillales;f__Streptococcaceae;g__Lactococcus	94.2	blast;95.90 iPHoP-RF;87.60
C8C_NODE_55_length_55025_cov_13.215818_full_1	57.24	d__Bacteria;p__Firmicutes;c__Bacilli;o__Lactobacillales;f__Lactobacillaceae;g__Limosilactobacillus	94.3	RaFAH;93.90 iPHoP-RF;59.80 blast;58.90
C8C_NODE_55_length_55025_cov_13.215818_full_1	57.24	d__Bacteria;p__Firmicutes;c__Bacilli;o__Lactobacillales;f__Lactobacillaceae;g__Lacticaseibacillus	91.6	RaFAH;93.90
C8C_NODE_55_length_55025_cov_13.215818_full_1	57.24	d__Bacteria;p__Firmicutes;c__Bacilli;o__Lactobacillales;f__Lactobacillaceae;g__Lactobacillus	91.6	RaFAH;93.90
C8C_NODE_55_length_55025_cov_13.215818_full_1	57.24	d__Bacteria;p__Firmicutes;c__Bacilli;o__Lactobacillales;f__Lactobacillaceae;g__Ligilactobacillus	91.6	RaFAH;93.90
C8C_NODE_55_length_55025_cov_13.215818_full_1	57.24	d__Bacteria;p__Firmicutes;c__Bacilli;o__Lactobacillales;f__Lactobacillaceae;g__Lactiplantibacillus	91.5	blast;93.80 iPHoP-RF;63.00
C8C_NODE_69_length_47254_cov_41.871263_full_1	20.01	d__Bacteria;p__Firmicutes;c__Bacilli;o__Lactobacillales;f__Lactobacillaceae;g__Weissella	91	iPHoP-RF;93.40 blast;92.20
C8C_NODE_69_length_47254_cov_41.871263_full_1	20.01	d__Bacteria;p__Firmicutes;c__Bacilli;o__Lactobacillales;f__Lactobacillaceae;g__Lacticaseibacillus	90.4	RaFAH;92.90
C8C_NODE_69_length_47254_cov_41.871263_full_1	20.01	d__Bacteria;p__Firmicutes;c__Bacilli;o__Lactobacillales;f__Lactobacillaceae;g__Lactobacillus	90.4	RaFAH;92.90
C8C_NODE_69_length_47254_cov_41.871263_full_1	20.01	d__Bacteria;p__Firmicutes;c__Bacilli;o__Lactobacillales;f__Lactobacillaceae;g__Ligilactobacillus	90.4	RaFAH;92.90
C8C_NODE_69_length_47254_cov_41.871263_full_1	20.01	d__Bacteria;p__Firmicutes;c__Bacilli;o__Lactobacillales;f__Lactobacillaceae;g__Limosilactobacillus	90.4	RaFAH;92.90
C8C_NODE_71_length_45431_cov_3.062025	63.22	d__Bacteria;p__Proteobacteria;c__Gammaproteobacteria;o__Enterobacterales;f__Enterobacteriaceae;g__Erwinia	99.3	RaFAH;95.10 iPHoP-RF;94.10
T0A_NODE_138_length_18750_cov_1.681845	32.87	d__Bacteria;p__Proteobacteria;c__Gammaproteobacteria;o__Enterobacterales;f__Enterobacteriaceae;g__Pantoea	92.1	blast;94.30 iPHoP-RF;91.40 CRISPR;65.90
T0A_NODE_160_length_16972_cov_2.045948	53.48	d__Bacteria;p__Proteobacteria;c__Gammaproteobacteria;o__Enterobacterales;f__Enterobacteriaceae;g__Pantoea	91.7	blast;94.00 iPHoP-RF;83.10
T0A_NODE_193_length_15474_cov_2.166352	18.63	d__Bacteria;p__Proteobacteria;c__Gammaproteobacteria;o__Enterobacterales;f__Enterobacteriaceae;g__Pantoea	95.3	iPHoP-RF;96.70 blast;93.60 CRISPR;58.80
T0A_NODE_193_length_15474_cov_2.166352	18.63	d__Bacteria;p__Proteobacteria;c__Gammaproteobacteria;o__Enterobacterales;f__Enterobacteriaceae;g__Erwinia	90.3	iPHoP-RF;92.80
T0A_NODE_196_length_15382_cov_3.023271	33.09	d__Bacteria;p__Proteobacteria;c__Gammaproteobacteria;o__Enterobacterales;f__Enterobacteriaceae;g__Pantoea	94.3	blast;96.00 iPHoP-RF;88.20
T0A_NODE_221_length_14412_cov_0.969058	49.82	d__Bacteria;p__Proteobacteria;c__Gammaproteobacteria;o__Enterobacterales;f__Enterobacteriaceae;g__Escherichia	91.8	iPHoP-RF;94.10
T0A_NODE_221_length_14412_cov_0.969058	49.82	d__Bacteria;p__Proteobacteria;c__Gammaproteobacteria;o__Enterobacterales;f__Enterobacteriaceae;g__Erwinia	90.8	blast;93.20 iPHoP-RF;82.20
T0A_NODE_293_length_12112_cov_0.772632	1.54	d__Bacteria;p__Proteobacteria;c__Alphaproteobacteria;o__Rhizobiales_A;f__Rhizobiaceae_A;g__Bartonella	90.3	iPHoP-RF;92.80
T0A_NODE_298_length_11923_cov_2.588250	45.23	d__Bacteria;p__Proteobacteria;c__Gammaproteobacteria;o__Enterobacterales;f__Enterobacteriaceae;g__Pantoea	91.6	blast;93.90 iPHoP-RF;93.70
T0A_NODE_323_length_11468_cov_1.852482	66.63	d__Bacteria;p__Proteobacteria;c__Gammaproteobacteria;o__Enterobacterales;f__Enterobacteriaceae;g__Pantoea	94.9	iPHoP-RF;96.40
T0A_NODE_331_length_11353_cov_2.165954	15.99	d__Bacteria;p__Proteobacteria;c__Gammaproteobacteria;o__Enterobacterales;f__Enterobacteriaceae;g__Pantoea	90.6	blast;93.00 iPHoP-RF;92.80
T0A_NODE_364_length_10660_cov_2.543910_full	47.99	d__Bacteria;p__Proteobacteria;c__Gammaproteobacteria;o__Enterobacterales;f__Enterobacteriaceae;g__Pantoea	97.2	blast;98.00 iPHoP-RF;87.00
T0A_NODE_389_length_10369_cov_0.786077	28.08	d__Bacteria;p__Proteobacteria;c__Gammaproteobacteria;o__Enterobacterales;f__Enterobacteriaceae;g__Pantoea	94.5	iPHoP-RF;96.10
T0A_NODE_389_length_10369_cov_0.786077	28.08	d__Bacteria;p__Proteobacteria;c__Gammaproteobacteria;o__Enterobacterales;f__Enterobacteriaceae;g__Ewingella	90.7	iPHoP-RF;93.10
T0A_NODE_389_length_10369_cov_0.786077	28.08	d__Bacteria;p__Proteobacteria;c__Gammaproteobacteria;o__Enterobacterales;f__Enterobacteriaceae;g__Erwinia	90.3	iPHoP-RF;92.80
T0B_NODE_107_length_23474_cov_42.111449_0_partial_1	10.57	d__Bacteria;p__Proteobacteria;c__Gammaproteobacteria;o__Enterobacterales;f__Enterobacteriaceae;g__Escherichia	94.5	iPHoP-RF;96.10
T0B_NODE_107_length_23474_cov_42.111449_0_partial_1	10.57	d__Bacteria;p__Proteobacteria;c__Gammaproteobacteria;o__Enterobacterales;f__Enterobacteriaceae;g__Pantoea	93.5	blast;95.40 iPHoP-RF;84.80
T0B_NODE_123_length_22418_cov_3.068503	61.49	d__Bacteria;p__Proteobacteria;c__Gammaproteobacteria;o__Enterobacterales;f__Enterobacteriaceae;g__Erwinia	90.7	RaFAH;93.10
T0B_NODE_125_length_21931_cov_1.183132	27.81	d__Bacteria;p__Proteobacteria;c__Gammaproteobacteria;o__Enterobacterales;f__Enterobacteriaceae;g__Escherichia	94.5	RaFAH;96.10
T0B_NODE_125_length_21931_cov_1.183132	27.81	d__Bacteria;p__Proteobacteria;c__Gammaproteobacteria;o__Enterobacterales;f__Enterobacteriaceae;g__Rosenbergiella	93	blast;95.00 iPHoP-RF;68.60
T0B_NODE_131_length_21560_cov_2.646153	31.42	d__Bacteria;p__Proteobacteria;c__Gammaproteobacteria;o__Enterobacterales;f__Enterobacteriaceae;g__Kluyvera	94.5	iPHoP-RF;96.10
T0B_NODE_131_length_21560_cov_2.646153	31.42	d__Bacteria;p__Proteobacteria;c__Gammaproteobacteria;o__Enterobacterales;f__Enterobacteriaceae;g__Pseudocitrobacter	93.1	iPHoP-RF;95.10
T0B_NODE_131_length_21560_cov_2.646153	31.42	d__Bacteria;p__Proteobacteria;c__Gammaproteobacteria;o__Enterobacterales;f__Enterobacteriaceae;g__	92.6	iPHoP-RF;94.70
T0B_NODE_189_length_18263_cov_2.246692	44.37	d__Bacteria;p__Proteobacteria;c__Gammaproteobacteria;o__Enterobacterales;f__Enterobacteriaceae;g__Pantoea	93.9	iPHoP-RF;95.70 blast;94.50
T0B_NODE_189_length_18263_cov_2.246692	44.37	d__Bacteria;p__Proteobacteria;c__Gammaproteobacteria;o__Enterobacterales;f__Enterobacteriaceae;g__Erwinia	90.3	iPHoP-RF;92.80 blast;88.00
T0B_NODE_213_length_17106_cov_1.411273_full	14.85	d__Bacteria;p__Proteobacteria;c__Gammaproteobacteria;o__Enterobacterales;f__Enterobacteriaceae;g__Pantoea	94.5	blast;96.10 iPHoP-RF;93.40
T0B_NODE_239_length_16035_cov_2.690847	73.16	d__Bacteria;p__Proteobacteria;c__Gammaproteobacteria;o__Enterobacterales;f__Enterobacteriaceae;g__Erwinia	98.4	iPHoP-RF;96.10 RaFAH;84.50
T0B_NODE_239_length_16035_cov_2.690847	73.16	d__Bacteria;p__Proteobacteria;c__Gammaproteobacteria;o__Enterobacterales;f__Enterobacteriaceae;g__Scandinavium	94.9	iPHoP-RF;96.40
T0B_NODE_239_length_16035_cov_2.690847	73.16	d__Bacteria;p__Proteobacteria;c__Gammaproteobacteria;o__Enterobacterales;f__Enterobacteriaceae;g__Buttiauxella	93.9	iPHoP-RF;95.70
T0B_NODE_239_length_16035_cov_2.690847	73.16	d__Bacteria;p__Proteobacteria;c__Gammaproteobacteria;o__Enterobacterales;f__Enterobacteriaceae;g__Superficieibacter	92.2	iPHoP-RF;94.40
T0B_NODE_239_length_16035_cov_2.690847	73.16	d__Bacteria;p__Proteobacteria;c__Gammaproteobacteria;o__Enterobacterales;f__Enterobacteriaceae;g__Citrobacter	91	iPHoP-RF;93.40
T0B_NODE_239_length_16035_cov_2.690847	73.16	d__Bacteria;p__Proteobacteria;c__Gammaproteobacteria;o__Enterobacterales;f__Enterobacteriaceae;g__Citrobacter_C	91	iPHoP-RF;93.40
T0B_NODE_239_length_16035_cov_2.690847	73.16	d__Bacteria;p__Proteobacteria;c__Gammaproteobacteria;o__Enterobacterales;f__Enterobacteriaceae;g__BIGb0383	90.7	iPHoP-RF;93.10
T0B_NODE_239_length_16035_cov_2.690847	73.16	d__Bacteria;p__Proteobacteria;c__Gammaproteobacteria;o__Enterobacterales;f__Enterobacteriaceae;g__LSJC7	90.7	iPHoP-RF;93.10
T0B_NODE_289_length_14805_cov_2.949176	57.6	d__Bacteria;p__Proteobacteria;c__Gammaproteobacteria;o__Enterobacterales;f__Enterobacteriaceae;g__Pantoea	93.9	blast;95.70 iPHoP-RF;90.80
T0B_NODE_320_length_14099_cov_2.788506	50.46	d__Bacteria;p__Proteobacteria;c__Gammaproteobacteria;o__Enterobacterales;f__Enterobacteriaceae;g__Pantoea	95.3	blast;96.70 iPHoP-RF;87.60
T0B_NODE_328_length_13913_cov_1.343102	44.77	d__Bacteria;p__Proteobacteria;c__Gammaproteobacteria;o__Enterobacterales;f__Enterobacteriaceae;g__Erwinia	95.3	iPHoP-RF;96.70 blast;93.50
T0B_NODE_329_length_13899_cov_34.399288	57.38	d__Bacteria;p__Proteobacteria;c__Gammaproteobacteria;o__Enterobacterales;f__Enterobacteriaceae;g__Pantoea	95.3	blast;96.70 iPHoP-RF;88.90
T0B_NODE_418_length_12430_cov_1.291311	25.55	d__Bacteria;p__Proteobacteria;c__Gammaproteobacteria;o__Enterobacterales;f__Enterobacteriaceae;g__Erwinia	91.2	RaFAH;91.80 iPHoP-RF;60.90
T0B_NODE_435_length_12155_cov_1.384021_full	10.28	d__Bacteria;p__Proteobacteria;c__Gammaproteobacteria;o__Enterobacterales;f__Enterobacteriaceae;g__Pantoea	93.1	iPHoP-RF;95.10 blast;94.30
T0B_NODE_444_length_12069_cov_1.136242	24.24	d__Bacteria;p__Proteobacteria;c__Gammaproteobacteria;o__Enterobacterales;f__Enterobacteriaceae;g__Erwinia	94.9	iPHoP-RF;96.40
T0B_NODE_444_length_12069_cov_1.136242	24.24	d__Bacteria;p__Proteobacteria;c__Gammaproteobacteria;o__Enterobacterales;f__Enterobacteriaceae;g__Tatumella	94.5	iPHoP-RF;96.10
T0B_NODE_444_length_12069_cov_1.136242	24.24	d__Bacteria;p__Proteobacteria;c__Gammaproteobacteria;o__Enterobacterales;f__Enterobacteriaceae;g__Pantoea	93.5	iPHoP-RF;95.40
T0B_NODE_488_length_11574_cov_1.136368_full	18.26	d__Bacteria;p__Proteobacteria;c__Gammaproteobacteria;o__Enterobacterales;f__Enterobacteriaceae;g__Pantoea	90.4	blast;92.90 iPHoP-RF;77.30
T0B_NODE_501_length_11444_cov_1.104356	5.61	d__Bacteria;p__Proteobacteria;c__Alphaproteobacteria;o__Rhodobacterales;f__Rhodobacteraceae;g__MED-G52	93.5	iPHoP-RF;95.40
T0B_NODE_55_length_35838_cov_36.268965_full	19.3	d__Bacteria;p__Proteobacteria;c__Gammaproteobacteria;o__Enterobacterales;f__Enterobacteriaceae;g__Pantoea	98.2	blast;98.70 iPHoP-RF;76.80
T0B_NODE_55_length_35838_cov_36.268965_full	19.3	d__Bacteria;p__Proteobacteria;c__Gammaproteobacteria;o__Enterobacterales;f__Enterobacteriaceae;g__Erwinia	92.1	RaFAH;94.30
T0B_NODE_614_length_10312_cov_1.050270	96.83	d__Bacteria;p__Proteobacteria;c__Gammaproteobacteria;o__Enterobacterales;f__Enterobacteriaceae;g__Pantoea	93.9	iPHoP-RF;95.70
T0B_NODE_629_length_10193_cov_0.888138	43.15	d__Bacteria;p__Proteobacteria;c__Gammaproteobacteria;o__Enterobacterales;f__Enterobacteriaceae;g__Erwinia	92.6	blast;94.70 iPHoP-RF;92.80
T0C_NODE_102_length_20620_cov_21.529547_full_1	86.41	d__Bacteria;p__Proteobacteria;c__Gammaproteobacteria;o__Enterobacterales;f__Enterobacteriaceae;g__Pantoea	94.5	blast;96.10 iPHoP-RF;83.60
T0C_NODE_139_length_17393_cov_3.030117	71.99	d__Bacteria;p__Proteobacteria;c__Gammaproteobacteria;o__Enterobacterales;f__Enterobacteriaceae;g__Pantoea	91.5	blast;93.80 iPHoP-RF;90.50
T0C_NODE_147_length_17109_cov_1.213697	45.71	d__Bacteria;p__Proteobacteria;c__Gammaproteobacteria;o__Enterobacterales;f__Enterobacteriaceae;g__Escherichia	93.1	iPHoP-RF;95.10
T0C_NODE_147_length_17109_cov_1.213697	45.71	d__Bacteria;p__Proteobacteria;c__Gammaproteobacteria;o__Enterobacterales;f__Enterobacteriaceae;g__Pantoea	92.2	iPHoP-RF;94.40
T0C_NODE_212_length_14354_cov_1.415126	33.71	d__Bacteria;p__Proteobacteria;c__Gammaproteobacteria;o__Enterobacterales;f__Enterobacteriaceae;g__Pantoea	94.5	blast;96.10 iPHoP-RF;71.10
T0C_NODE_249_length_13204_cov_2.836048	8.69	d__Bacteria;p__Proteobacteria;c__Gammaproteobacteria;o__Enterobacterales;f__Enterobacteriaceae;g__Erwinia	92.2	RaFAH;94.40
T0C_NODE_270_length_12610_cov_1.618681	69.3	d__Bacteria;p__Proteobacteria;c__Gammaproteobacteria;o__Enterobacterales;f__Enterobacteriaceae;g__Pantoea	95.9	iPHoP-RF;97.10
T0C_NODE_270_length_12610_cov_1.618681	69.3	d__Bacteria;p__Proteobacteria;c__Gammaproteobacteria;o__Enterobacterales;f__Enterobacteriaceae;g__Citrobacter_A	94.5	iPHoP-RF;96.10
T0C_NODE_270_length_12610_cov_1.618681	69.3	d__Bacteria;p__Proteobacteria;c__Gammaproteobacteria;o__Enterobacterales;f__Enterobacteriaceae;g__Citrobacter	92.2	iPHoP-RF;94.40
T0C_NODE_307_length_12017_cov_1.123802	5.31	d__Bacteria;p__Proteobacteria;c__Gammaproteobacteria;o__Enterobacterales;f__Enterobacteriaceae;g__Pantoea	91.6	blast;93.90 iPHoP-RF;93.10
T0C_NODE_307_length_12017_cov_1.123802	5.31	d__Bacteria;p__Proteobacteria;c__Gammaproteobacteria;o__Enterobacterales;f__Enterobacteriaceae;g__Pectobacterium	91.1	blast;93.50 iPHoP-RF;80.30
T0C_NODE_307_length_12017_cov_1.123802	5.31	d__Bacteria;p__Proteobacteria;c__Gammaproteobacteria;o__Enterobacterales;f__Enterobacteriaceae;g__Atlantibacter	90.2	blast;92.70 iPHoP-RF;74.30
T0C_NODE_50_length_29781_cov_2.254637	85.85	d__Bacteria;p__Proteobacteria;c__Gammaproteobacteria;o__Enterobacterales;f__Enterobacteriaceae;g__Erwinia	90.6	RaFAH;93.00

## Sheet: Table S9
Contig	gene_position	start_position	end_position	strandedness	vogdb_id	vogdb_hits	vogdb_categories
C15A_NODE_107_length_27396_cov_1.653343_1	1	88	1536	-1
C15A_NODE_107_length_27396_cov_1.653343_2	2	1553	2266	-1
C15A_NODE_107_length_27396_cov_1.653343_3	3	2259	3407	-1	VOG02429	sp|P51767|BPJ_BPP2 Baseplate protein J; XhXs	Xs;Xh
C15A_NODE_107_length_27396_cov_1.653343_4	4	3391	3777	-1
C15A_NODE_107_length_27396_cov_1.653343_5	5	3767	4180	-1
C15A_NODE_107_length_27396_cov_1.653343_6	6	4189	5442	-1
C15A_NODE_107_length_27396_cov_1.653343_7	7	5442	5912	-1
C15A_NODE_107_length_27396_cov_1.653343_8	8	5927	6904	-1
C15A_NODE_107_length_27396_cov_1.653343_9	9	6964	12840	-1
C15A_NODE_107_length_27396_cov_1.653343_10	10	12833	13075	-1
C15A_NODE_107_length_27396_cov_1.653343_11	11	13041	13472	-1
C15A_NODE_107_length_27396_cov_1.653343_12	12	13518	13931	-1
C15A_NODE_107_length_27396_cov_1.653343_13	13	13947	15092	-1	VOG01694	REFSEQ hypothetical protein; Xu	Xu
C15A_NODE_107_length_27396_cov_1.653343_14	14	15076	15564	-1
C15A_NODE_107_length_27396_cov_1.653343_15	15	15551	15940	-1
C15A_NODE_107_length_27396_cov_1.653343_16	16	15933	16547	-1	VOG01679	REFSEQ hypothetical protein; Xu	Xu
C15A_NODE_107_length_27396_cov_1.653343_17	17	16544	16882	-1
C15A_NODE_107_length_27396_cov_1.653343_18	18	16894	17073	-1
C15A_NODE_107_length_27396_cov_1.653343_19	19	17089	17592	-1
C15A_NODE_107_length_27396_cov_1.653343_20	20	17675	18832	-1	VOG00864	sp|D6RRG1|CAPSD_BPKPP Major capsid protein; XhXs	Xs;Xh
C15A_NODE_107_length_27396_cov_1.653343_21	21	18845	19225	-1
C15A_NODE_107_length_27396_cov_1.653343_22	22	19237	19740	-1
C15A_NODE_107_length_27396_cov_1.653343_23	23	19753	20682	-1
C15A_NODE_107_length_27396_cov_1.653343_24	24	20682	22313	-1	VOG00031	sp|Q05220|PORTL_BPML5 Portal protein; XpXrXs	Xr;Xp;Xs
C15A_NODE_107_length_27396_cov_1.653343_25	25	22331	23839	-1	VOG00164	sp|P10310|TERL_BPT3 Terminase, large subunit; XhXr	Xr;Xh
C15A_NODE_107_length_27396_cov_1.653343_26	26	23836	24666	-1	VOG00517	sp|P45915|YQAS_BACSU Uncharacterized protein YqaS; Xu	Xu
C15A_NODE_107_length_27396_cov_1.653343_27	27	24751	25308	-1
C15A_NODE_107_length_27396_cov_1.653343_28	28	25320	25565	-1
C15A_NODE_107_length_27396_cov_1.653343_29	29	25594	25905	-1
C15A_NODE_107_length_27396_cov_1.653343_30	30	26132	26326	-1
C15A_NODE_107_length_27396_cov_1.653343_31	31	26320	26409	-1
C15A_NODE_107_length_27396_cov_1.653343_32	32	26536	27057	1
C15A_NODE_107_length_27396_cov_1.653343_33	33	27032	27142	-1
C15A_NODE_107_length_27396_cov_1.653343_34	34	27207	27395	1
C15A_NODE_11_length_211176_cov_41.662614_0_partial_1_1	1	569	967	-1
C15A_NODE_11_length_211176_cov_41.662614_0_partial_1_2	2	1116	1340	1
C15A_NODE_11_length_211176_cov_41.662614_0_partial_1_3	3	1713	1853	1
C15A_NODE_11_length_211176_cov_41.662614_0_partial_1_4	4	1869	2120	-1
C15A_NODE_11_length_211176_cov_41.662614_0_partial_1_5	5	2193	2471	-1
C15A_NODE_11_length_211176_cov_41.662614_0_partial_1_6	6	2468	2845	-1
C15A_NODE_11_length_211176_cov_41.662614_0_partial_1_7	7	2937	3185	1
C15A_NODE_11_length_211176_cov_41.662614_0_partial_1_8	8	3185	3340	1
C15A_NODE_11_length_211176_cov_41.662614_0_partial_1_9	9	3495	3656	1
C15A_NODE_11_length_211176_cov_41.662614_0_partial_1_10	10	3729	4250	1
C15A_NODE_11_length_211176_cov_41.662614_0_partial_1_11	11	4255	4578	1
C15A_NODE_11_length_211176_cov_41.662614_0_partial_1_12	12	4578	4811	1
C15A_NODE_11_length_211176_cov_41.662614_0_partial_1_13	13	5103	5279	1
C15A_NODE_11_length_211176_cov_41.662614_0_partial_1_14	14	5282	5824	1	VOG01528	sp|P06023|GAM_BPMU Putative DNA ends protecting protein gam; XhXp	Xp;Xh
C15A_NODE_11_length_211176_cov_41.662614_0_partial_1_15	15	5840	6535	1	VOG01381	sp|O31907|YORG_BACSU SPbeta prophage-derived uncharacterized protein YorG; Xu	Xu
C15A_NODE_11_length_211176_cov_41.662614_0_partial_1_16	16	6516	7085	1	VOG00172	REFSEQ hypothetical protein; Xu	Xu
C15A_NODE_11_length_211176_cov_41.662614_0_partial_1_17	17	7120	8046	1	VOG25059	REFSEQ replication protein; Xu	Xu
C15A_NODE_11_length_211176_cov_41.662614_0_partial_1_18	18	8046	8345	1
C15A_NODE_11_length_211176_cov_41.662614_0_partial_1_19	19	8342	9037	1	VOG02554	REFSEQ hypothetical protein; Xu	Xu
C15A_NODE_11_length_211176_cov_41.662614_0_partial_1_20	20	9041	9442	1
C15A_NODE_11_length_211176_cov_41.662614_0_partial_1_21	21	9439	9609	1
C15A_NODE_11_length_211176_cov_41.662614_0_partial_1_22	22	9678	9860	1
C15A_NODE_11_length_211176_cov_41.662614_0_partial_1_23	23	9841	10164	1
C15A_NODE_11_length_211176_cov_41.662614_0_partial_1_24	24	10275	10754	1	VOG00667	sp|O34055|ARPU_BPO12 Putative autolysin regulatory protein ArpU; Xu	Xu
C15A_NODE_11_length_211176_cov_41.662614_0_partial_1_25	25	11240	11446	-1	VOG13838	sp|Q9CHE9|YHJA_LACLA UPF0337 protein YhjA; Xu	Xu
C15A_NODE_11_length_211176_cov_41.662614_0_partial_1_26	26	11570	11854	-1
C15A_NODE_11_length_211176_cov_41.662614_0_partial_1_27	27	11976	12107	1
C15A_NODE_11_length_211176_cov_41.662614_0_partial_1_28	28	12094	12621	1
C15A_NODE_11_length_211176_cov_41.662614_0_partial_1_29	29	12763	13065	1
C15A_NODE_11_length_211176_cov_41.662614_0_partial_1_30	30	13081	13680	1	VOG00759	REFSEQ hypothetical protein; Xu	Xu
C15A_NODE_11_length_211176_cov_41.662614_0_partial_1_31	31	13661	15112	1	VOG00164	sp|P10310|TERL_BPT3 Terminase, large subunit; XhXr	Xr;Xh
C15A_NODE_11_length_211176_cov_41.662614_0_partial_1_32	32	15124	16569	1	VOG01334	sp|P44183|Y1409_HAEIN Uncharacterized protein HI_1409; Xu	Xu
C15A_NODE_11_length_211176_cov_41.662614_0_partial_1_33	33	16578	17420	1	VOG00088	sp|P45918|YQBB_BACSU Uncharacterized protein YqbB; Xu	Xu
C15A_NODE_11_length_211176_cov_41.662614_0_partial_1_34	34	17543	18043	1
C15A_NODE_11_length_211176_cov_41.662614_0_partial_1_35	35	18056	19210	1	VOG00409	sp|P44180|Y1405_HAEIN Uncharacterized protein HI_1405; Xu	Xu
C15A_NODE_11_length_211176_cov_41.662614_0_partial_1_36	36	19210	19716	1	VOG22450	REFSEQ gp7; Xu	Xu
C15A_NODE_11_length_211176_cov_41.662614_0_partial_1_37	37	19736	20623	1	VOG01619	sp|A0A0U5AF03|CAPSD_BPK22 Major capsid protein; Xs	Xs
C15A_NODE_11_length_211176_cov_41.662614_0_partial_1_38	38	20635	21015	1
C15A_NODE_11_length_211176_cov_41.662614_0_partial_1_39	39	21029	21409	1
C15A_NODE_11_length_211176_cov_41.662614_0_partial_1_40	40	21406	21996	1	VOG01679	REFSEQ hypothetical protein; Xu	Xu
C15A_NODE_11_length_211176_cov_41.662614_0_partial_1_41	41	21998	22378	1
C15A_NODE_11_length_211176_cov_41.662614_0_partial_1_42	42	22362	22844	1
C15A_NODE_11_length_211176_cov_41.662614_0_partial_1_43	43	22847	23902	1	VOG01694	REFSEQ hypothetical protein; Xu	Xu
C15A_NODE_11_length_211176_cov_41.662614_0_partial_1_44	44	23916	24332	1	VOG03216	sp|D6RRG7|ORF10_BPKPP Structural protein ORF10; Xs	Xs
C15A_NODE_11_length_211176_cov_41.662614_0_partial_1_45	45	24414	24764	1
C15A_NODE_11_length_211176_cov_41.662614_0_partial_1_46	46	24799	24978	1
C15A_NODE_11_length_211176_cov_41.662614_0_partial_1_47	47	25009	30846	1
C15A_NODE_11_length_211176_cov_41.662614_0_partial_1_48	48	30843	31778	1
C15A_NODE_11_length_211176_cov_41.662614_0_partial_1_49	49	31790	32218	1	VOG00120	REFSEQ hypothetical protein; Xu	Xu
C15A_NODE_11_length_211176_cov_41.662614_0_partial_1_50	50	32211	33257	1	VOG00860	REFSEQ hypothetical protein; Xu	Xu
C15A_NODE_11_length_211176_cov_41.662614_0_partial_1_51	51	33268	33723	1
C15A_NODE_11_length_211176_cov_41.662614_0_partial_1_52	52	33723	34130	1
C15A_NODE_11_length_211176_cov_41.662614_0_partial_1_53	53	34120	35295	1	VOG02429	sp|P51767|BPJ_BPP2 Baseplate protein J; XhXs	Xs;Xh
C15A_NODE_11_length_211176_cov_41.662614_0_partial_1_54	54	35288	35905	1
C15A_NODE_11_length_211176_cov_41.662614_0_partial_1_55	55	35905	37551	1
C15A_NODE_11_length_211176_cov_41.662614_0_partial_1_56	56	38067	38318	1	VOG00343	sp|Q51647|YISX_BURM1 Insertion element IS401 uncharacterized 12.4 kDa protein; Xu	Xu
C15A_NODE_11_length_211176_cov_41.662614_0_partial_1_57	57	38372	39214	1	VOG00636	sp|P16942|T629_SHISO Transposase for insertion sequence element IS629; Xr	Xr
C15A_NODE_11_length_211176_cov_41.662614_0_partial_1_58	58	40699	41187	1	VOG00271	REFSEQ holin; Xu	Xu
C15A_NODE_139_length_22044_cov_2.321394_1	1	123	1007	-1
C15A_NODE_139_length_22044_cov_2.321394_2	2	1008	1211	-1	VOG02198	sp|O03978|HOLIN_BPDP1 Holin; XhXp	Xp;Xh
C15A_NODE_139_length_22044_cov_2.321394_3	3	1224	1595	-1	VOG15562	REFSEQ hypothetical protein; Xu	Xu
C15A_NODE_139_length_22044_cov_2.321394_4	4	1614	2981	-1	VOG02999	REFSEQ BppU family baseplate upper protein; Xu	Xu
C15A_NODE_139_length_22044_cov_2.321394_5	5	2963	5179	-1	VOG00378	REFSEQ tail protein; Xu	Xu
C15A_NODE_139_length_22044_cov_2.321394_6	6	5176	5937	-1	VOG00248	sp|O31977|YOMH_BACSU SPbeta prophage-derived uncharacterized protein YomH; Xu	Xu
C15A_NODE_139_length_22044_cov_2.321394_7	7	5937	9812	-1	VOG01168	REFSEQ hypothetical protein; Xu	Xu
C15A_NODE_139_length_22044_cov_2.321394_8	8	9927	10529	-1
C15A_NODE_139_length_22044_cov_2.321394_9	9	10804	11109	-1
C15A_NODE_139_length_22044_cov_2.321394_10	10	11175	11756	-1	VOG01659	REFSEQ tail protein; Xu	Xu
C15A_NODE_139_length_22044_cov_2.321394_11	11	11771	12160	-1
C15A_NODE_139_length_22044_cov_2.321394_12	12	12157	12561	-1	VOG17674	REFSEQ hypothetical protein; Xu	Xu
C15A_NODE_139_length_22044_cov_2.321394_13	13	12554	12940	-1
C15A_NODE_139_length_22044_cov_2.321394_14	14	12906	13238	-1	VOG03921	REFSEQ head-tail adapter protein; Xu	Xu
C15A_NODE_139_length_22044_cov_2.321394_15	15	13256	13513	-1
C15A_NODE_139_length_22044_cov_2.321394_16	16	13574	14707	-1	VOG00323	sp|P85500|CAPSD_BPPAJ Capsid polyprotein; XhXs	Xs;Xh
C15A_NODE_139_length_22044_cov_2.321394_17	17	14707	15492	-1	VOG15472	REFSEQ ATP-dependent Clp protease proteolytic subunit; Xu	Xu
C15A_NODE_139_length_22044_cov_2.321394_18	18	15479	16672	-1	VOG00045	sp|Q6QGD5|PORTL_BPT5 Portal protein; XhXpXrXs	Xr;Xs;Xp;Xh
C15A_NODE_139_length_22044_cov_2.321394_19	19	16864	18603	-1	VOG06541	sp|Q05219|VG13_BPML5 Gene 13 protein; Xu	Xu
C15A_NODE_139_length_22044_cov_2.321394_20	20	18600	19193	-1	VOG04012	REFSEQ P27 family terminase small subunit; Xu	Xu
C15A_NODE_139_length_22044_cov_2.321394_21	21	19183	19302	-1
C15A_NODE_139_length_22044_cov_2.321394_22	22	19320	19619	-1	VOG00802	REFSEQ hypothetical protein; Xu	Xu
C15A_NODE_139_length_22044_cov_2.321394_23	23	19668	19967	-1
C15A_NODE_139_length_22044_cov_2.321394_24	24	20162	20959	-1
C15A_NODE_139_length_22044_cov_2.321394_25	25	20963	21514	-1	VOG13760	REFSEQ LemA family protein; Xu	Xu
C15A_NODE_139_length_22044_cov_2.321394_26	26	21633	22043	-1
C15A_NODE_170_length_19067_cov_1.186325_1	1	3	413	1
C15A_NODE_170_length_19067_cov_1.186325_2	2	428	1021	1	VOG00172	REFSEQ hypothetical protein; Xu	Xu
C15A_NODE_170_length_19067_cov_1.186325_3	3	1034	3355	1	VOG01314	sp|P10277|PRIM_BPP4 Putative P4-specific DNA primase; XhXr	Xr;Xh
C15A_NODE_170_length_19067_cov_1.186325_4	4	3942	4160	1
C15A_NODE_170_length_19067_cov_1.186325_5	5	4177	4506	1
C15A_NODE_170_length_19067_cov_1.186325_6	6	4509	4994	1	VOG02081	REFSEQ hypothetical protein; Xu	Xu
C15A_NODE_170_length_19067_cov_1.186325_7	7	5002	5205	1
C15A_NODE_170_length_19067_cov_1.186325_8	8	5205	5732	1	VOG01721	REFSEQ hypothetical protein; Xu	Xu
C15A_NODE_170_length_19067_cov_1.186325_9	9	5845	6474	1
C15A_NODE_170_length_19067_cov_1.186325_10	10	6497	6931	1	VOG00570	sp|P68928|TERS_BPSF6 Terminase small subunit; Xr	Xr
C15A_NODE_170_length_19067_cov_1.186325_11	11	6924	8168	1	VOG04913	sp|P54308|TERL_BPSPP Terminase, large subunit; XhXr	Xr;Xh
C15A_NODE_170_length_19067_cov_1.186325_12	12	8159	9577	1	VOG00031	sp|Q05220|PORTL_BPML5 Portal protein; XpXrXs	Xr;Xp;Xs
C15A_NODE_170_length_19067_cov_1.186325_13	13	9543	10598	1
C15A_NODE_170_length_19067_cov_1.186325_14	14	10631	10960	1	VOG04449	REFSEQ YjcQ family protein; Xu	Xu
C15A_NODE_170_length_19067_cov_1.186325_15	15	11087	11635	1	VOG16074	REFSEQ scaffold; Xu	Xu
C15A_NODE_170_length_19067_cov_1.186325_16	16	11657	12568	1	VOG02639	sp|P19727|CAPSB_BPT7 Minor capsid protein; XrXs	Xr;Xs
C15A_NODE_170_length_19067_cov_1.186325_17	17	12645	12956	1
C15A_NODE_170_length_19067_cov_1.186325_18	18	12968	13357	1
C15A_NODE_170_length_19067_cov_1.186325_19	19	13354	13731	1	VOG06744	REFSEQ hypothetical protein; Xu	Xu
C15A_NODE_170_length_19067_cov_1.186325_20	20	13731	14135	1	VOG00110	REFSEQ HK97 gp10 family protein; Xu	Xu
C15A_NODE_170_length_19067_cov_1.186325_21	21	14135	14554	1	VOG02258	REFSEQ hypothetical protein; Xu	Xu
C15A_NODE_170_length_19067_cov_1.186325_22	22	14538	14690	1
C15A_NODE_170_length_19067_cov_1.186325_23	23	14692	16113	1	VOG00614	sp|P85225|VPN1_BPPHE Putative tail sheath protein; Xs	Xs
C15A_NODE_170_length_19067_cov_1.186325_24	24	16137	16625	1	VOG07901	sp|P45929|YQBM_BACSU Uncharacterized protein YqbM; Xu	Xu
C15A_NODE_170_length_19067_cov_1.186325_25	25	16642	17046	1	VOG04110	sp|P45930|YQBN_BACSU Uncharacterized protein YqbN; Xu	Xu
C15A_NODE_170_length_19067_cov_1.186325_26	26	17269	19065	1
C15A_NODE_171_length_19018_cov_1.563761_1	1	691	1005	1
C15A_NODE_171_length_19018_cov_1.563761_2	2	1452	2066	-1
C15A_NODE_171_length_19018_cov_1.563761_3	3	2083	2382	-1
C15A_NODE_171_length_19018_cov_1.563761_4	4	2539	3285	-1
C15A_NODE_171_length_19018_cov_1.563761_5	5	3285	4385	-1
C15A_NODE_171_length_19018_cov_1.563761_6	6	4660	6564	-1
C15A_NODE_171_length_19018_cov_1.563761_7	7	6709	8415	1
C15A_NODE_171_length_19018_cov_1.563761_8	8	8415	8729	1
C15A_NODE_171_length_19018_cov_1.563761_9	9	9817	10023	-1
C15A_NODE_171_length_19018_cov_1.563761_10	10	10669	10839	-1
C15A_NODE_171_length_19018_cov_1.563761_11	11	11714	12016	-1
C15A_NODE_171_length_19018_cov_1.563761_12	12	12075	12602	-1
C15A_NODE_171_length_19018_cov_1.563761_13	13	12665	13117	-1	VOG00667	sp|O34055|ARPU_BPO12 Putative autolysin regulatory protein ArpU; Xu	Xu
C15A_NODE_171_length_19018_cov_1.563761_14	14	13907	14272	-1
C15A_NODE_171_length_19018_cov_1.563761_15	15	14284	14547	-1
C15A_NODE_171_length_19018_cov_1.563761_16	16	14552	14761	-1
C15A_NODE_171_length_19018_cov_1.563761_17	17	14703	14885	-1
C15A_NODE_171_length_19018_cov_1.563761_18	18	14959	15384	-1
C15A_NODE_171_length_19018_cov_1.563761_19	19	15487	15756	-1
C15A_NODE_171_length_19018_cov_1.563761_20	20	15773	16465	-1	VOG02089	REFSEQ Rha family transcriptional regulator; Xu	Xu
C15A_NODE_171_length_19018_cov_1.563761_21	21	16462	16653	-1
C15A_NODE_171_length_19018_cov_1.563761_22	22	16646	16831	-1
C15A_NODE_171_length_19018_cov_1.563761_23	23	17001	17579	1
C15A_NODE_171_length_19018_cov_1.563761_24	24	17637	18785	1	VOG00012	sp|P22877|INTR_SACER Integrase; XhXr	Xr;Xh
C15A_NODE_252_length_13859_cov_1.541436_1	1	27	875	-1
C15A_NODE_252_length_13859_cov_1.541436_2	2	978	1316	-1
C15A_NODE_252_length_13859_cov_1.541436_3	3	1423	1962	-1
C15A_NODE_252_length_13859_cov_1.541436_4	4	2093	2215	-1
C15A_NODE_252_length_13859_cov_1.541436_5	5	2230	2817	-1	VOG00414	sp|P10426|YIM2_BPPH1 Uncharacterized immunity region protein 2; Xu	Xu
C15A_NODE_252_length_13859_cov_1.541436_6	6	2828	3352	-1
C15A_NODE_252_length_13859_cov_1.541436_7	7	3605	3790	1
C15A_NODE_252_length_13859_cov_1.541436_8	8	3747	4163	-1
C15A_NODE_252_length_13859_cov_1.541436_9	9	4347	4538	1
C15A_NODE_252_length_13859_cov_1.541436_10	10	4545	4784	-1	VOG07089	REFSEQ hypothetical protein; Xu	Xu
C15A_NODE_252_length_13859_cov_1.541436_11	11	4889	5137	1
C15A_NODE_252_length_13859_cov_1.541436_12	12	5153	5941	1	VOG01163	REFSEQ hypothetical protein; Xu	Xu
C15A_NODE_252_length_13859_cov_1.541436_13	13	5955	6293	1
C15A_NODE_252_length_13859_cov_1.541436_14	14	6307	6453	1
C15A_NODE_252_length_13859_cov_1.541436_15	15	6524	6748	-1
C15A_NODE_252_length_13859_cov_1.541436_16	16	6844	7080	1	VOG26707	REFSEQ DUF1408 domain-containing protein; Xu	Xu
C15A_NODE_252_length_13859_cov_1.541436_17	17	7181	7576	1	VOG16339	REFSEQ hypothetical protein; Xu	Xu
C15A_NODE_252_length_13859_cov_1.541436_18	18	7585	8343	1	VOG09967	REFSEQ recombinase; Xu	Xu
C15A_NODE_252_length_13859_cov_1.541436_19	19	8336	8761	1	VOG00805	sp|O21902|SSB_BPLSK SSB protein; Xh	Xh
C15A_NODE_252_length_13859_cov_1.541436_20	20	8905	9231	1
C15A_NODE_252_length_13859_cov_1.541436_21	21	9231	10034	1	VOG00146	REFSEQ helix-turn-helix domain-containing protein; Xu	Xu
C15A_NODE_252_length_13859_cov_1.541436_22	22	10015	10236	1	VOG23823	REFSEQ hypothetical protein; Xu	Xu
C15A_NODE_252_length_13859_cov_1.541436_23	23	10338	11006	-1
C15A_NODE_252_length_13859_cov_1.541436_24	24	11204	11590	-1
C15A_NODE_252_length_13859_cov_1.541436_25	25	11810	12001	-1
C15A_NODE_252_length_13859_cov_1.541436_26	26	12086	12355	-1
C15A_NODE_252_length_13859_cov_1.541436_27	27	12472	12861	1	VOG00153	sp|Q03182|RINA_BPPHA Transcriptional activator rinA; Xu	Xu
C15A_NODE_252_length_13859_cov_1.541436_28	28	13142	13837	1
C15A_NODE_330_length_11641_cov_1.835591_1	1	502	990	-1
C15A_NODE_330_length_11641_cov_1.835591_2	2	1429	1719	-1	VOG00089	REFSEQ head-tail connector protein; Xu	Xu
C15A_NODE_330_length_11641_cov_1.835591_3	3	1792	3303	-1	VOG00395	sp|O64210|CAPSD_BPMD2 Probable major capsid protein gp17; Xs	Xs
C15A_NODE_330_length_11641_cov_1.835591_4	4	3296	4336	-1	VOG00045	sp|Q6QGD5|PORTL_BPT5 Portal protein; XhXpXrXs	Xr;Xs;Xp;Xh
C15A_NODE_330_length_11641_cov_1.835591_5	5	4333	4539	-1
C15A_NODE_330_length_11641_cov_1.835591_6	6	4493	6193	-1	VOG06541	sp|Q05219|VG13_BPML5 Gene 13 protein; Xu	Xu
C15A_NODE_330_length_11641_cov_1.835591_7	7	6186	6629	-1
C15A_NODE_330_length_11641_cov_1.835591_8	8	6651	6779	-1
C15A_NODE_330_length_11641_cov_1.835591_9	9	6832	7218	-1
C15A_NODE_330_length_11641_cov_1.835591_10	10	7211	7576	-1
C15A_NODE_330_length_11641_cov_1.835591_11	11	7650	8414	-1
C15A_NODE_330_length_11641_cov_1.835591_12	12	9223	9372	-1
C15A_NODE_330_length_11641_cov_1.835591_13	13	11025	11537	1
C15A_NODE_349_length_11170_cov_3.892149_1	1	21	548	-1
C15A_NODE_349_length_11170_cov_3.892149_2	2	738	1058	-1	VOG03071	REFSEQ hypothetical protein; Xu	Xu
C15A_NODE_349_length_11170_cov_3.892149_3	3	1036	1734	-1	VOG02554	REFSEQ hypothetical protein; Xu	Xu
C15A_NODE_349_length_11170_cov_3.892149_4	4	1735	2553	-1
C15A_NODE_349_length_11170_cov_3.892149_5	5	2556	3599	-1	VOG02364	sp|P03698|VBET_LAMBD Recombination protein bet; Xr	Xr
C15A_NODE_349_length_11170_cov_3.892149_6	6	3583	3780	-1
C15A_NODE_349_length_11170_cov_3.892149_7	7	3821	4072	-1
C15A_NODE_349_length_11170_cov_3.892149_8	8	4056	4316	-1
C15A_NODE_349_length_11170_cov_3.892149_9	9	4352	4693	-1
C15A_NODE_349_length_11170_cov_3.892149_10	10	4697	5440	-1	VOG17574	sp|P03037|RANT_BPP22 Antirepressor protein ant; Xu	Xu
C15A_NODE_349_length_11170_cov_3.892149_11	11	5528	5845	1
C15A_NODE_349_length_11170_cov_3.892149_12	12	5820	5960	-1
C15A_NODE_349_length_11170_cov_3.892149_13	13	5962	6162	-1
C15A_NODE_349_length_11170_cov_3.892149_14	14	6224	6418	-1
C15A_NODE_349_length_11170_cov_3.892149_15	15	6584	6967	1
C15A_NODE_349_length_11170_cov_3.892149_16	16	6971	7414	1
C15A_NODE_349_length_11170_cov_3.892149_17	17	7404	7592	1
C15A_NODE_349_length_11170_cov_3.892149_18	18	7592	8533	1
C15A_NODE_349_length_11170_cov_3.892149_19	19	8484	8708	-1
C15A_NODE_349_length_11170_cov_3.892149_20	20	8820	8993	1
C15A_NODE_349_length_11170_cov_3.892149_21	21	9029	9979	1
C15A_NODE_349_length_11170_cov_3.892149_22	22	9998	10312	1
C15A_NODE_349_length_11170_cov_3.892149_23	23	10315	10881	1
C15A_NODE_349_length_11170_cov_3.892149_24	24	11040	11168	1
C15A_NODE_362_length_10807_cov_9.076685_1	1	3	1058	1
C15A_NODE_362_length_10807_cov_9.076685_2	2	1269	1517	1
C15A_NODE_362_length_10807_cov_9.076685_3	3	1550	1696	1
C15A_NODE_362_length_10807_cov_9.076685_4	4	2324	2650	1
C15A_NODE_362_length_10807_cov_9.076685_5	5	2647	2883	1
C15A_NODE_362_length_10807_cov_9.076685_6	6	2904	3230	1
C15A_NODE_362_length_10807_cov_9.076685_7	7	3254	3685	1
C15A_NODE_362_length_10807_cov_9.076685_8	8	3695	4714	1
C15A_NODE_362_length_10807_cov_9.076685_9	9	5024	5332	1
C15A_NODE_362_length_10807_cov_9.076685_10	10	5346	6122	1	VOG18133	sp|P26295|DRN1_STREQ Deoxyribonuclease; Xu	Xu
C15A_NODE_362_length_10807_cov_9.076685_11	11	6134	6814	1
C15A_NODE_362_length_10807_cov_9.076685_12	12	6753	7154	1
C15A_NODE_362_length_10807_cov_9.076685_13	13	7147	8562	1
C15A_NODE_362_length_10807_cov_9.076685_14	14	8647	8916	1
C15A_NODE_362_length_10807_cov_9.076685_15	15	8963	9181	1
C15A_NODE_362_length_10807_cov_9.076685_16	16	9511	10689	1
C15A_NODE_408_length_10068_cov_1.249170_1	1	2	232	1
C15A_NODE_408_length_10068_cov_1.249170_2	2	589	1614	1	VOG03105	sp|Q45618|TRA6_GEOSE Putative transposase for insertion sequence element IS5376; Xr	Xr
C15A_NODE_408_length_10068_cov_1.249170_3	3	1688	3229	1
C15A_NODE_408_length_10068_cov_1.249170_4	4	3311	7708	1	VOG00561	sp|P20703|UVSW_BPT4 ATP-dependent DNA helicase uvsW; Xh	Xh
C15A_NODE_408_length_10068_cov_1.249170_5	5	7708	8448	1
C15A_NODE_408_length_10068_cov_1.249170_6	6	8480	10066	1
C15A_NODE_53_length_55985_cov_9.832719_full_1_1	1	8	418	-1
C15A_NODE_53_length_55985_cov_9.832719_full_1_2	2	411	737	-1
C15A_NODE_53_length_55985_cov_9.832719_full_1_3	3	963	1196	1
C15A_NODE_53_length_55985_cov_9.832719_full_1_4	4	1208	1402	1
C15A_NODE_53_length_55985_cov_9.832719_full_1_5	5	1408	2124	1	VOG00701	REFSEQ putative antirepressor; Xu	Xu
C15A_NODE_53_length_55985_cov_9.832719_full_1_6	6	2134	2265	1
C15A_NODE_53_length_55985_cov_9.832719_full_1_7	7	2271	2633	-1
C15A_NODE_53_length_55985_cov_9.832719_full_1_8	8	2734	2952	-1
C15A_NODE_53_length_55985_cov_9.832719_full_1_9	9	3042	3269	1
C15A_NODE_53_length_55985_cov_9.832719_full_1_10	10	3360	3560	1
C15A_NODE_53_length_55985_cov_9.832719_full_1_11	11	3557	3766	1
C15A_NODE_53_length_55985_cov_9.832719_full_1_12	12	3769	4674	1	VOG02848	REFSEQ DUF1351 domain-containing protein; Xu	Xu
C15A_NODE_53_length_55985_cov_9.832719_full_1_13	13	4674	5303	1	VOG10058	sp|P04892|ERF_BPP22 Essential recombination function protein; Xh	Xh
C15A_NODE_53_length_55985_cov_9.832719_full_1_14	14	5303	5728	1	VOG00805	sp|O21902|SSB_BPLSK SSB protein; Xh	Xh
C15A_NODE_53_length_55985_cov_9.832719_full_1_15	15	5739	6569	1	VOG08000	REFSEQ hypothetical protein; Xu	Xu
C15A_NODE_53_length_55985_cov_9.832719_full_1_16	16	6539	6817	1
C15A_NODE_53_length_55985_cov_9.832719_full_1_17	17	6804	7100	1
C15A_NODE_53_length_55985_cov_9.832719_full_1_18	18	7097	7801	1	VOG02554	REFSEQ hypothetical protein; Xu	Xu
C15A_NODE_53_length_55985_cov_9.832719_full_1_19	19	8049	8450	1
C15A_NODE_53_length_55985_cov_9.832719_full_1_20	20	8447	8581	1
C15A_NODE_53_length_55985_cov_9.832719_full_1_21	21	8776	9294	1
C15A_NODE_53_length_55985_cov_9.832719_full_1_22	22	9420	9998	1
C15A_NODE_53_length_55985_cov_9.832719_full_1_23	23	9995	10102	1
C15A_NODE_53_length_55985_cov_9.832719_full_1_24	24	10403	10573	1
C15A_NODE_53_length_55985_cov_9.832719_full_1_25	25	10573	11790	1	VOG00232	sp|O31948|YONJ_BACSU SPbeta prophage-derived uncharacterized protein YonJ; Xu	Xu
C15A_NODE_53_length_55985_cov_9.832719_full_1_26	26	11820	12296	1
C15A_NODE_53_length_55985_cov_9.832719_full_1_27	27	12355	13077	1
C15A_NODE_53_length_55985_cov_9.832719_full_1_28	28	13152	13403	1
C15A_NODE_53_length_55985_cov_9.832719_full_1_29	29	13471	14157	1
C15A_NODE_53_length_55985_cov_9.832719_full_1_30	30	14201	14491	1
C15A_NODE_53_length_55985_cov_9.832719_full_1_31	31	14469	14963	1	VOG01321	sp|O64200|VG04_BPMD2 Gene 4 protein; Xu	Xu
C15A_NODE_53_length_55985_cov_9.832719_full_1_32	32	15148	15615	1	VOG00623	REFSEQ P27 family terminase small subunit; Xu	Xu
C15A_NODE_53_length_55985_cov_9.832719_full_1_33	33	15602	17479	1	VOG04908	REFSEQ putative terminase small subunit; Xu	Xu
C15A_NODE_53_length_55985_cov_9.832719_full_1_34	34	17476	17673	1	VOG22357	REFSEQ DUF1056 family protein; Xu	Xu
C15A_NODE_53_length_55985_cov_9.832719_full_1_35	35	17670	18842	1	VOG00045	sp|Q6QGD5|PORTL_BPT5 Portal protein; XhXpXrXs	Xr;Xs;Xp;Xh
C15A_NODE_53_length_55985_cov_9.832719_full_1_36	36	18826	19560	1	VOG15472	REFSEQ ATP-dependent Clp protease proteolytic subunit; Xu	Xu
C15A_NODE_53_length_55985_cov_9.832719_full_1_37	37	19566	20786	1	VOG00395	sp|O64210|CAPSD_BPMD2 Probable major capsid protein gp17; Xs	Xs
C15A_NODE_53_length_55985_cov_9.832719_full_1_38	38	20848	21186	1	VOG00089	REFSEQ head-tail connector protein; Xu	Xu
C15A_NODE_53_length_55985_cov_9.832719_full_1_39	39	21167	21511	1	VOG00063	sp|O48446|HCP16_BPSPP Head completion protein gp16; XpXrXs	Xr;Xp;Xs
C15A_NODE_53_length_55985_cov_9.832719_full_1_40	40	21504	21932	1
C15A_NODE_53_length_55985_cov_9.832719_full_1_41	41	21929	22300	1	VOG01028	REFSEQ DUF806 family protein; Xu	Xu
C15A_NODE_53_length_55985_cov_9.832719_full_1_42	42	22304	22942	1	VOG01659	REFSEQ tail protein; Xu	Xu
C15A_NODE_53_length_55985_cov_9.832719_full_1_43	43	23020	23427	1
C15A_NODE_53_length_55985_cov_9.832719_full_1_44	44	23667	27572	1	VOG03675	REFSEQ tail protein; Xu	Xu
C15A_NODE_53_length_55985_cov_9.832719_full_1_45	45	27652	28782	1
C15A_NODE_57_length_52500_cov_6.765127_1_1	1	14	682	-1	VOG00317	REFSEQ hypothetical protein; Xu	Xu
C15A_NODE_57_length_52500_cov_6.765127_1_2	2	666	827	-1
C15A_NODE_57_length_52500_cov_6.765127_1_3	3	831	1085	-1	VOG23877	REFSEQ hypothetical protein; Xu	Xu
C15A_NODE_57_length_52500_cov_6.765127_1_4	4	1078	3843	-1	VOG15818	REFSEQ tail fiber protein; Xu	Xu
C15A_NODE_57_length_52500_cov_6.765127_1_5	5	3860	6229	-1	VOG22638	REFSEQ baseplate protein tal-like protein; Xu	Xu
C15A_NODE_57_length_52500_cov_6.765127_1_6	6	6293	8056	-1	VOG00635	REFSEQ tail family protein; Xu	Xu
C15A_NODE_57_length_52500_cov_6.765127_1_7	7	8137	13305	-1	VOG03675	REFSEQ tail protein; Xu	Xu
C15A_NODE_57_length_52500_cov_6.765127_1_8	8	13318	13509	-1	VOG04967	REFSEQ hypothetical protein; Xu	Xu
C15A_NODE_57_length_52500_cov_6.765127_1_9	9	13506	13889	-1
C15A_NODE_57_length_52500_cov_6.765127_1_10	10	14091	14729	-1	VOG01659	REFSEQ tail protein; Xu	Xu
C15A_NODE_57_length_52500_cov_6.765127_1_11	11	14730	15113	-1	VOG01028	REFSEQ DUF806 family protein; Xu	Xu
C15A_NODE_57_length_52500_cov_6.765127_1_12	12	15110	15550	-1	VOG17424	REFSEQ hypothetical protein; Xu	Xu
C15A_NODE_57_length_52500_cov_6.765127_1_13	13	15540	15902	-1	VOG00063	sp|O48446|HCP16_BPSPP Head completion protein gp16; XpXrXs	Xr;Xp;Xs
C15A_NODE_57_length_52500_cov_6.765127_1_14	14	15886	16233	-1	VOG00089	REFSEQ head-tail connector protein; Xu	Xu
C15A_NODE_57_length_52500_cov_6.765127_1_15	15	16297	17529	-1	VOG00395	sp|O64210|CAPSD_BPMD2 Probable major capsid protein gp17; Xs	Xs
C15A_NODE_57_length_52500_cov_6.765127_1_16	16	17529	18269	-1	VOG15472	REFSEQ ATP-dependent Clp protease proteolytic subunit; Xu	Xu
C15A_NODE_57_length_52500_cov_6.765127_1_17	17	18262	19455	-1	VOG00045	sp|Q6QGD5|PORTL_BPT5 Portal protein; XhXpXrXs	Xr;Xs;Xp;Xh
C15A_NODE_57_length_52500_cov_6.765127_1_18	18	19642	21156	-1	VOG04908	REFSEQ putative terminase small subunit; Xu	Xu
C15A_NODE_57_length_52500_cov_6.765127_1_19	19	21153	21557	-1	VOG04908	REFSEQ putative terminase small subunit; Xu	Xu
C15A_NODE_57_length_52500_cov_6.765127_1_20	20	21593	22051	-1	VOG00623	REFSEQ P27 family terminase small subunit; Xu	Xu
C15A_NODE_57_length_52500_cov_6.765127_1_21	21	22182	22712	-1	VOG00006	sp|Q5UPT6|YL245_MIMIV Uncharacterized HNH endonuclease L245; Xu	Xu
C15A_NODE_57_length_52500_cov_6.765127_1_22	22	22690	23175	-1	VOG00802	REFSEQ hypothetical protein; Xu	Xu
C15A_NODE_57_length_52500_cov_6.765127_1_23	23	23220	23582	-1
C15A_NODE_57_length_52500_cov_6.765127_1_24	24	23527	23682	-1
C15A_NODE_57_length_52500_cov_6.765127_1_25	25	23736	24509	-1
C15A_NODE_57_length_52500_cov_6.765127_1_26	26	24953	25420	-1	VOG00153	sp|Q03182|RINA_BPPHA Transcriptional activator rinA; Xu	Xu
C15A_NODE_57_length_52500_cov_6.765127_1_27	27	25560	25727	-1
C15A_NODE_57_length_52500_cov_6.765127_1_28	28	25845	26276	-1	VOG00810	REFSEQ hypothetical protein; Xu	Xu
C15A_NODE_57_length_52500_cov_6.765127_1_29	29	26273	26680	-1	VOG07594	REFSEQ hypothetical protein; Xu	Xu
C15A_NODE_57_length_52500_cov_6.765127_1_30	30	26673	26837	-1
C15A_NODE_57_length_52500_cov_6.765127_1_31	31	26917	27408	-1	VOG03776	REFSEQ class I SAM-dependent methyltransferase; Xu	Xu
C15A_NODE_57_length_52500_cov_6.765127_1_32	32	27493	27801	-1	VOG03117	REFSEQ hypothetical protein; Xu	Xu
C15A_NODE_57_length_52500_cov_6.765127_1_33	33	27779	27940	-1
C15A_NODE_57_length_52500_cov_6.765127_1_34	34	27937	28722	-1	VOG02491	sp|P15026|ISTB_PSEAI Insertion sequence IS21 putative ATP-binding protein; Xh	Xh
C15A_NODE_57_length_52500_cov_6.765127_1_35	35	28722	29474	-1	VOG00146	REFSEQ helix-turn-helix domain-containing protein; Xu	Xu
C15A_NODE_57_length_52500_cov_6.765127_1_36	36	29483	30175	-1	VOG02554	REFSEQ hypothetical protein; Xu	Xu
C15A_NODE_57_length_52500_cov_6.765127_1_37	37	30195	30500	-1
C15A_NODE_57_length_52500_cov_6.765127_1_38	38	30501	30707	-1
C15A_NODE_57_length_52500_cov_6.765127_1_39	39	30955	31197	-1
C15A_NODE_57_length_52500_cov_6.765127_1_40	40	31158	31406	-1
C15A_NODE_57_length_52500_cov_6.765127_1_41	41	31419	31622	-1
C15A_NODE_57_length_52500_cov_6.765127_1_42	42	31788	32078	1	VOG07436	REFSEQ hypothetical protein; Xu	Xu
C15A_NODE_57_length_52500_cov_6.765127_1_43	43	32672	32932	-1
C15A_NODE_57_length_52500_cov_6.765127_1_44	44	33044	33346	1	VOG12356	REFSEQ hypothetical protein; Xu	Xu
C15A_NODE_57_length_52500_cov_6.765127_1_45	45	33343	33546	-1
C15A_NODE_57_length_52500_cov_6.765127_1_46	46	33557	34309	-1	VOG01163	REFSEQ hypothetical protein; Xu	Xu
C15A_NODE_57_length_52500_cov_6.765127_1_47	47	34322	34537	-1
C15A_NODE_57_length_52500_cov_6.765127_1_48	48	34793	35119	1
C15A_NODE_57_length_52500_cov_6.765127_1_49	49	35150	35539	1
C15A_NODE_57_length_52500_cov_6.765127_1_50	50	35614	36480	1
C15A_NODE_57_length_52500_cov_6.765127_1_51	51	36440	36682	1
C15A_NODE_57_length_52500_cov_6.765127_1_52	52	37016	37246	1
C15A_NODE_57_length_52500_cov_6.765127_1_53	53	37404	37604	1
C15A_NODE_57_length_52500_cov_6.765127_1_54	54	37735	37911	1
C15A_NODE_57_length_52500_cov_6.765127_1_55	55	38037	38294	1
C15A_NODE_57_length_52500_cov_6.765127_1_56	56	38477	38791	1
C15A_NODE_57_length_52500_cov_6.765127_1_57	57	38960	40123	1	VOG00012	sp|P22877|INTR_SACER Integrase; XhXr	Xr;Xh
C15B_NODE_118_length_25566_cov_4.589017_full_1_1	1	531	755	-1
C15B_NODE_118_length_25566_cov_4.589017_full_1_2	2	829	1023	-1
C15B_NODE_118_length_25566_cov_4.589017_full_1_3	3	1051	1485	-1
C15B_NODE_118_length_25566_cov_4.589017_full_1_4	4	1840	2571	-1	VOG02566	sp|A0A0H3CCP8|SOCA_CAUVN Antitoxin SocA; Xu	Xu
C15B_NODE_118_length_25566_cov_4.589017_full_1_5	5	2573	3241	-1	VOG10482	REFSEQ hypothetical protein; Xu	Xu
C15B_NODE_118_length_25566_cov_4.589017_full_1_6	6	4264	4611	-1
C15B_NODE_118_length_25566_cov_4.589017_full_1_7	7	4666	5499	-1	VOG02639	sp|P19727|CAPSB_BPT7 Minor capsid protein; XrXs	Xr;Xs
C15B_NODE_118_length_25566_cov_4.589017_full_1_8	8	5517	6065	-1
C15B_NODE_118_length_25566_cov_4.589017_full_1_9	9	6082	6498	-1
C15B_NODE_118_length_25566_cov_4.589017_full_1_10	10	6700	7338	-1
C15B_NODE_118_length_25566_cov_4.589017_full_1_11	11	7604	7762	-1
C15B_NODE_118_length_25566_cov_4.589017_full_1_12	12	7779	7991	-1
C15B_NODE_118_length_25566_cov_4.589017_full_1_13	13	7984	8301	-1
C15B_NODE_118_length_25566_cov_4.589017_full_1_14	14	8335	8604	-1
C15B_NODE_118_length_25566_cov_4.589017_full_1_15	15	9215	9490	-1
C15B_NODE_118_length_25566_cov_4.589017_full_1_16	16	9507	10040	-1
C15B_NODE_118_length_25566_cov_4.589017_full_1_17	17	10332	12518	-1	VOG01314	sp|P10277|PRIM_BPP4 Putative P4-specific DNA primase; XhXr	Xr;Xh
C15B_NODE_118_length_25566_cov_4.589017_full_1_18	18	12549	12740	-1
C15B_NODE_118_length_25566_cov_4.589017_full_1_19	19	12759	13469	-1
C15B_NODE_118_length_25566_cov_4.589017_full_1_20	20	13470	13679	-1
C15B_NODE_118_length_25566_cov_4.589017_full_1_21	21	13861	14358	1
C15B_NODE_118_length_25566_cov_4.589017_full_1_22	22	14480	15691	1	VOG00012	sp|P22877|INTR_SACER Integrase; XhXr	Xr;Xh
C15B_NODE_118_length_25566_cov_4.589017_full_1_23	23	16135	16581	1
C15B_NODE_118_length_25566_cov_4.589017_full_1_24	24	16643	17977	-1	VOG00081	sp|P04530|HELIC_BPT4 DnaB-like replicative helicase; XhXr	Xr;Xh
C15B_NODE_188_length_19249_cov_3.546543_1	1	34	1149	-1	VOG16177	REFSEQ hypothetical protein; Xu	Xu
C15B_NODE_188_length_19249_cov_3.546543_2	2	1139	1570	-1
C15B_NODE_188_length_19249_cov_3.546543_3	3	1591	4677	-1	VOG00437	sp|O64314|TMP_BPP2 Probable tape measure protein; Xs	Xs
C15B_NODE_188_length_19249_cov_3.546543_4	4	4692	5159	-1
C15B_NODE_188_length_19249_cov_3.546543_5	5	5182	5823	-1
C15B_NODE_188_length_19249_cov_3.546543_6	6	6062	6520	-1	VOG09248	REFSEQ hypothetical protein; Xu	Xu
C15B_NODE_188_length_19249_cov_3.546543_7	7	6538	7446	-1	VOG17147	REFSEQ hypothetical protein; Xu	Xu
C15B_NODE_188_length_19249_cov_3.546543_8	8	7451	7882	-1	VOG17350	REFSEQ hypothetical protein; Xu	Xu
C15B_NODE_188_length_19249_cov_3.546543_9	9	7885	8322	-1
C15B_NODE_188_length_19249_cov_3.546543_10	10	8329	8700	-1	VOG05151	REFSEQ hypothetical protein; Xu	Xu
C15B_NODE_188_length_19249_cov_3.546543_11	11	8697	8972	-1	VOG04790	REFSEQ hypothetical protein; Xu	Xu
C15B_NODE_188_length_19249_cov_3.546543_12	12	8981	9187	-1
C15B_NODE_188_length_19249_cov_3.546543_13	13	9240	10280	-1	VOG00864	sp|D6RRG1|CAPSD_BPKPP Major capsid protein; XhXs	Xs;Xh
C15B_NODE_188_length_19249_cov_3.546543_14	14	10299	10640	-1	VOG03276	REFSEQ hypothetical protein; Xu	Xu
C15B_NODE_188_length_19249_cov_3.546543_15	15	10655	11290	-1	VOG16074	REFSEQ scaffold; Xu	Xu
C15B_NODE_188_length_19249_cov_3.546543_16	16	11339	11638	-1
C15B_NODE_188_length_19249_cov_3.546543_17	17	11658	11879	-1
C15B_NODE_188_length_19249_cov_3.546543_18	18	11883	12209	-1	VOG15449	REFSEQ hypothetical protein; Xu	Xu
C15B_NODE_188_length_19249_cov_3.546543_19	19	12175	13110	-1	VOG10100	REFSEQ hypothetical protein; Xu	Xu
C15B_NODE_188_length_19249_cov_3.546543_20	20	13103	14554	-1	VOG00031	sp|Q05220|PORTL_BPML5 Portal protein; XpXrXs	Xr;Xp;Xs
C15B_NODE_188_length_19249_cov_3.546543_21	21	14554	15897	-1	VOG00943	sp|P39786|XTMB_BACSU PBSX phage terminase large subunit; Xr	Xr
C15B_NODE_188_length_19249_cov_3.546543_22	22	15897	16631	-1	VOG00517	sp|P45915|YQAS_BACSU Uncharacterized protein YqaS; Xu	Xu
C15B_NODE_188_length_19249_cov_3.546543_23	23	16711	16875	-1
C15B_NODE_188_length_19249_cov_3.546543_24	24	16977	17570	-1
C15B_NODE_188_length_19249_cov_3.546543_25	25	17686	18438	1
C15B_NODE_188_length_19249_cov_3.546543_26	26	18409	18600	-1
C15B_NODE_188_length_19249_cov_3.546543_27	27	18607	18783	-1
C15B_NODE_194_length_18906_cov_1.085415_1	1	2	823	1
C15B_NODE_194_length_18906_cov_1.085415_2	2	865	3357	1	VOG18052	REFSEQ hypothetical protein; Xu	Xu
C15B_NODE_194_length_18906_cov_1.085415_3	3	3401	4075	1	VOG20584	REFSEQ hypothetical protein; Xu	Xu
C15B_NODE_194_length_18906_cov_1.085415_4	4	4086	6101	1	VOG00099	REFSEQ hypothetical protein; Xu	Xu
C15B_NODE_194_length_18906_cov_1.085415_5	5	6240	7256	-1	VOG26339	REFSEQ hypothetical protein; Xu	Xu
C15B_NODE_194_length_18906_cov_1.085415_6	6	7280	7480	-1	VOG00141	REFSEQ hypothetical protein; Xu	Xu
C15B_NODE_194_length_18906_cov_1.085415_7	7	7553	10771	-1	VOG00011	sp|O64235|DPOL_BPMD2 DNA polymerase; XhXr	Xr;Xh
C15B_NODE_194_length_18906_cov_1.085415_8	8	10810	12618	-1	VOG00081	sp|P04530|HELIC_BPT4 DnaB-like replicative helicase; XhXr	Xr;Xh
C15B_NODE_194_length_18906_cov_1.085415_9	9	12634	12885	-1
C15B_NODE_194_length_18906_cov_1.085415_10	10	12894	13406	-1
C15B_NODE_194_length_18906_cov_1.085415_11	11	13533	13823	-1
C15B_NODE_194_length_18906_cov_1.085415_12	12	13823	14806	-1	VOG03745	REFSEQ hypothetical protein; Xu	Xu
C15B_NODE_194_length_18906_cov_1.085415_13	13	14778	15410	-1
C15B_NODE_194_length_18906_cov_1.085415_14	14	15410	15895	-1	VOG01800	REFSEQ hypothetical protein; Xu	Xu
C15B_NODE_194_length_18906_cov_1.085415_15	15	15867	16226	-1
C15B_NODE_194_length_18906_cov_1.085415_16	16	16210	16770	-1	VOG04916	REFSEQ hypothetical protein; Xu	Xu
C15B_NODE_194_length_18906_cov_1.085415_17	17	16771	16959	-1	VOG03721	REFSEQ hypothetical protein; Xu	Xu
C15B_NODE_194_length_18906_cov_1.085415_18	18	16961	17209	-1
C15B_NODE_194_length_18906_cov_1.085415_19	19	17209	17646	-1	VOG00515	REFSEQ hypothetical protein; Xu	Xu
C15B_NODE_194_length_18906_cov_1.085415_20	20	17646	17846	-1
C15B_NODE_194_length_18906_cov_1.085415_21	21	17843	18502	-1	VOG18711	REFSEQ hypothetical protein; Xu	Xu
C15B_NODE_194_length_18906_cov_1.085415_22	22	18557	18904	-1
C15B_NODE_219_length_17493_cov_1.866463_full_1	1	619	1227	1
C15B_NODE_219_length_17493_cov_1.866463_full_2	2	1625	2266	-1
C15B_NODE_219_length_17493_cov_1.866463_full_3	3	2311	2898	-1
C15B_NODE_219_length_17493_cov_1.866463_full_4	4	2920	5934	-1
C15B_NODE_219_length_17493_cov_1.866463_full_5	5	5963	6427	-1
C15B_NODE_219_length_17493_cov_1.866463_full_6	6	6813	7223	-1
C15B_NODE_219_length_17493_cov_1.866463_full_7	7	7439	9067	-1	VOG02581	REFSEQ DNA primase/helicase; Xu	Xu
C15B_NODE_219_length_17493_cov_1.866463_full_8	8	9078	9872	-1
C15B_NODE_219_length_17493_cov_1.866463_full_9	9	9884	10210	-1	VOG02304	REFSEQ hypothetical protein; Xu	Xu
C15B_NODE_219_length_17493_cov_1.866463_full_10	10	10207	10521	-1
C15B_NODE_219_length_17493_cov_1.866463_full_11	11	10518	10715	-1	VOG06382	REFSEQ hypothetical protein; Xu	Xu
C15B_NODE_219_length_17493_cov_1.866463_full_12	12	10699	10953	-1
C15B_NODE_219_length_17493_cov_1.866463_full_13	13	11001	11279	-1
C15B_NODE_219_length_17493_cov_1.866463_full_14	14	11341	11589	-1
C15B_NODE_219_length_17493_cov_1.866463_full_15	15	12419	12616	-1
C15B_NODE_219_length_17493_cov_1.866463_full_16	16	12881	13783	1
C15B_NODE_219_length_17493_cov_1.866463_full_17	17	14180	14311	1
C15B_NODE_219_length_17493_cov_1.866463_full_18	18	14714	15100	1
C15B_NODE_219_length_17493_cov_1.866463_full_19	19	15439	15603	1
C15B_NODE_219_length_17493_cov_1.866463_full_20	20	16078	17262	1	VOG00012	sp|P22877|INTR_SACER Integrase; XhXr	Xr;Xh
C15B_NODE_409_length_12625_cov_2.022244_1	1	2	4000	-1
C15B_NODE_409_length_12625_cov_2.022244_2	2	4016	4642	-1	VOG08829	REFSEQ Gp15 family bacterioprotein; Xu	Xu
C15B_NODE_409_length_12625_cov_2.022244_3	3	4646	5062	-1
C15B_NODE_409_length_12625_cov_2.022244_4	4	5118	5627	-1	VOG00687	sp|P85991|IGLVP_BPSK9 Ig-like virion protein; Xs	Xs
C15B_NODE_409_length_12625_cov_2.022244_5	5	5620	6027	-1	VOG00532	REFSEQ minor capsid protein; Xu	Xu
C15B_NODE_409_length_12625_cov_2.022244_6	6	6027	6380	-1	VOG00035	REFSEQ hypothetical protein; Xu	Xu
C15B_NODE_409_length_12625_cov_2.022244_7	7	6381	6731	-1	VOG01522	sp|Q04769|YG35_BPLLH Uncharacterized protein ORF5; Xu	Xu
C15B_NODE_409_length_12625_cov_2.022244_8	8	6728	7123	-1	VOG00996	sp|Q04768|YG34_BPLLH Uncharacterized protein ORF4; Xu	Xu
C15B_NODE_409_length_12625_cov_2.022244_9	9	7134	7379	-1
C15B_NODE_409_length_12625_cov_2.022244_10	10	7392	8306	-1	VOG02639	sp|P19727|CAPSB_BPT7 Minor capsid protein; XrXs	Xr;Xs
C15B_NODE_409_length_12625_cov_2.022244_11	11	8329	8919	-1	VOG16074	REFSEQ scaffold; Xu	Xu
C15B_NODE_409_length_12625_cov_2.022244_12	12	9011	10147	-1
C15B_NODE_409_length_12625_cov_2.022244_13	13	10151	11695	-1	VOG00031	sp|Q05220|PORTL_BPML5 Portal protein; XpXrXs	Xr;Xp;Xs
C15B_NODE_409_length_12625_cov_2.022244_14	14	11712	12623	-1
C15B_NODE_448_length_12018_cov_0.937179_full_1	1	207	758	1
C15B_NODE_448_length_12018_cov_0.937179_full_2	2	970	1308	1
C15B_NODE_448_length_12018_cov_0.937179_full_3	3	1271	2218	1
C15B_NODE_448_length_12018_cov_0.937179_full_4	4	2556	4091	1
C15B_NODE_448_length_12018_cov_0.937179_full_5	5	4088	4339	1
C15B_NODE_448_length_12018_cov_0.937179_full_6	6	4336	4599	1
C15B_NODE_448_length_12018_cov_0.937179_full_7	7	4634	5125	1
C15B_NODE_448_length_12018_cov_0.937179_full_8	8	5201	5518	1
C15B_NODE_448_length_12018_cov_0.937179_full_9	9	5515	5748	1
C15B_NODE_448_length_12018_cov_0.937179_full_10	10	5775	6350	1
C15B_NODE_448_length_12018_cov_0.937179_full_11	11	6340	7197	1
C15B_NODE_448_length_12018_cov_0.937179_full_12	12	7255	8124	1
C15B_NODE_448_length_12018_cov_0.937179_full_13	13	8553	8783	1
C15B_NODE_448_length_12018_cov_0.937179_full_14	14	8746	8910	1
C15B_NODE_448_length_12018_cov_0.937179_full_15	15	9885	10127	1
C15B_NODE_448_length_12018_cov_0.937179_full_16	16	10365	10784	1
C15B_NODE_448_length_12018_cov_0.937179_full_17	17	10825	11229	1
C15B_NODE_448_length_12018_cov_0.937179_full_18	18	11246	11539	1
C15B_NODE_448_length_12018_cov_0.937179_full_19	19	11643	12017	1
C15B_NODE_573_length_10565_cov_2.408603_1	1	2	1801	1	VOG00620	sp|P49541|YCF46_TRICV Uncharacterized AAA domain-containing protein ycf46; Xh	Xh
C15B_NODE_573_length_10565_cov_2.408603_2	2	3607	4062	1
C15B_NODE_573_length_10565_cov_2.408603_3	3	4184	5302	-1	VOG00012	sp|P22877|INTR_SACER Integrase; XhXr	Xr;Xh
C15B_NODE_573_length_10565_cov_2.408603_4	4	5280	5498	-1
C15B_NODE_573_length_10565_cov_2.408603_5	5	5501	5707	-1
C15B_NODE_573_length_10565_cov_2.408603_6	6	5726	7072	-1
C15B_NODE_573_length_10565_cov_2.408603_7	7	7431	7856	-1
C15B_NODE_573_length_10565_cov_2.408603_8	8	7865	8320	-1
C15B_NODE_573_length_10565_cov_2.408603_9	9	8317	8586	-1
C15B_NODE_573_length_10565_cov_2.408603_10	10	8806	9249	1
C15B_NODE_573_length_10565_cov_2.408603_11	11	9349	10176	1
C15B_NODE_600_length_10322_cov_1.374497_1	1	3	743	-1
C15B_NODE_600_length_10322_cov_1.374497_2	2	743	1192	-1
C15B_NODE_600_length_10322_cov_1.374497_3	3	1394	1954	-1	VOG02472	sp|Q9T1P8|VP50_BPAPS Putative protein p50; Xu	Xu
C15B_NODE_600_length_10322_cov_1.374497_4	4	1988	3154	-1	VOG02318	sp|O64262|VG69_BPMD2 Gene 69 protein; Xu	Xu
C15B_NODE_600_length_10322_cov_1.374497_5	5	3155	3553	-1
C15B_NODE_600_length_10322_cov_1.374497_6	6	3559	3921	-1
C15B_NODE_600_length_10322_cov_1.374497_7	7	3924	4544	-1	VOG00006	sp|Q5UPT6|YL245_MIMIV Uncharacterized HNH endonuclease L245; Xu	Xu
C15B_NODE_600_length_10322_cov_1.374497_8	8	4561	4956	-1
C15B_NODE_600_length_10322_cov_1.374497_9	9	5041	5343	-1
C15B_NODE_600_length_10322_cov_1.374497_10	10	5548	5754	-1
C15B_NODE_600_length_10322_cov_1.374497_11	11	5893	6123	-1
C15B_NODE_600_length_10322_cov_1.374497_12	12	6165	6368	-1
C15B_NODE_600_length_10322_cov_1.374497_13	13	6528	7058	1
C15B_NODE_600_length_10322_cov_1.374497_14	14	7063	7488	1
C15B_NODE_600_length_10322_cov_1.374497_15	15	7621	7755	1
C15B_NODE_600_length_10322_cov_1.374497_16	16	8415	8906	1
C15B_NODE_600_length_10322_cov_1.374497_17	17	8997	9098	1
C15B_NODE_600_length_10322_cov_1.374497_18	18	9038	10105	1	VOG00012	sp|P22877|INTR_SACER Integrase; XhXr	Xr;Xh
C15B_NODE_60_length_49438_cov_2.809617_1_1	1	61	294	-1
C15B_NODE_60_length_49438_cov_2.809617_1_2	2	360	2351	-1	VOG00011	sp|O64235|DPOL_BPMD2 DNA polymerase; XhXr	Xr;Xh
C15B_NODE_60_length_49438_cov_2.809617_1_3	3	2420	2983	-1	VOG02472	sp|Q9T1P8|VP50_BPAPS Putative protein p50; Xu	Xu
C15B_NODE_60_length_49438_cov_2.809617_1_4	4	2997	4118	-1	VOG02318	sp|O64262|VG69_BPMD2 Gene 69 protein; Xu	Xu
C15B_NODE_60_length_49438_cov_2.809617_1_5	5	4120	4440	-1
C15B_NODE_60_length_49438_cov_2.809617_1_6	6	4433	4633	-1
C15B_NODE_60_length_49438_cov_2.809617_1_7	7	4772	5452	-1
C15B_NODE_60_length_49438_cov_2.809617_1_8	8	5445	5855	-1	VOG24285	sp|Q92FD1|Y175_LISIN Uncharacterized protein Lin0175; Xh	Xh
C15B_NODE_60_length_49438_cov_2.809617_1_9	9	5885	7237	-1	VOG18081	REFSEQ hypothetical protein; Xu	Xu
C15B_NODE_60_length_49438_cov_2.809617_1_10	10	7363	8520	-1	VOG00414	sp|P10426|YIM2_BPPH1 Uncharacterized immunity region protein 2; Xu	Xu
C15B_NODE_60_length_49438_cov_2.809617_1_11	11	8550	9305	-1	VOG22095	REFSEQ DUF5986 family protein; Xu	Xu
C15B_NODE_60_length_49438_cov_2.809617_1_12	12	9436	10563	-1
C15B_NODE_60_length_49438_cov_2.809617_1_13	13	10565	12421	-1	VOG01780	REFSEQ peptidoglycan DD-metalloendopeptidase family protein; Xu	Xu
C15B_NODE_60_length_49438_cov_2.809617_1_14	14	12421	13128	-1	VOG00248	sp|O31977|YOMH_BACSU SPbeta prophage-derived uncharacterized protein YomH; Xu	Xu
C15B_NODE_60_length_49438_cov_2.809617_1_15	15	13129	15573	-1	VOG00893	REFSEQ tail tape measure protein; Xu	Xu
C15B_NODE_60_length_49438_cov_2.809617_1_16	16	15587	15736	-1
C15B_NODE_60_length_49438_cov_2.809617_1_17	17	15775	16059	-1	VOG01832	REFSEQ hypothetical protein; Xu	Xu
C15B_NODE_60_length_49438_cov_2.809617_1_18	18	16084	16650	-1	VOG01659	REFSEQ tail protein; Xu	Xu
C15B_NODE_60_length_49438_cov_2.809617_1_19	19	16671	16991	-1	VOG00090	REFSEQ hypothetical protein; Xu	Xu
C15B_NODE_60_length_49438_cov_2.809617_1_20	20	16988	17374	-1	VOG02497	REFSEQ HK97 gp10 family protein; Xu	Xu
C15B_NODE_60_length_49438_cov_2.809617_1_21	21	17367	17693	-1	VOG00063	sp|O48446|HCP16_BPSPP Head completion protein gp16; XpXrXs	Xr;Xp;Xs
C15B_NODE_60_length_49438_cov_2.809617_1_22	22	17690	18262	-1	VOG00255	sp|Q6QGD9|HCP_BPT5 Head completion protein; XhXs	Xs;Xh
C15B_NODE_60_length_49438_cov_2.809617_1_23	23	18305	18787	-1
C15B_NODE_60_length_49438_cov_2.809617_1_24	24	18801	20084	-1	VOG00395	sp|O64210|CAPSD_BPMD2 Probable major capsid protein gp17; Xs	Xs
C15B_NODE_60_length_49438_cov_2.809617_1_25	25	20118	20894	-1	VOG15472	REFSEQ ATP-dependent Clp protease proteolytic subunit; Xu	Xu
C15B_NODE_60_length_49438_cov_2.809617_1_26	26	20948	21316	-1
C15B_NODE_60_length_49438_cov_2.809617_1_27	27	21330	21884	-1
C15B_NODE_60_length_49438_cov_2.809617_1_28	28	22022	23296	-1	VOG00045	sp|Q6QGD5|PORTL_BPT5 Portal protein; XhXpXrXs	Xr;Xs;Xp;Xh
C15B_NODE_60_length_49438_cov_2.809617_1_29	29	23308	24858	-1	VOG06541	sp|Q05219|VG13_BPML5 Gene 13 protein; Xu	Xu
C15B_NODE_60_length_49438_cov_2.809617_1_30	30	24858	25331	-1	VOG00623	REFSEQ P27 family terminase small subunit; Xu	Xu
C15B_NODE_60_length_49438_cov_2.809617_1_31	31	25386	26396	-1
C15B_NODE_60_length_49438_cov_2.809617_1_32	32	26473	26682	-1
C15B_NODE_60_length_49438_cov_2.809617_1_33	33	26675	27427	-1
C15B_NODE_60_length_49438_cov_2.809617_1_34	34	27541	27852	-1
C15B_NODE_60_length_49438_cov_2.809617_1_35	35	27920	29164	-1	VOG00606	sp|P14243|MTC9_CITFR Type II methyltransferase M.Cfr9I; XhXp	Xp;Xh
C15B_NODE_60_length_49438_cov_2.809617_1_36	36	29696	30382	-1
C15B_NODE_60_length_49438_cov_2.809617_1_37	37	30437	30817	-1
C15B_NODE_60_length_49438_cov_2.809617_1_38	38	30894	31352	-1
C15B_NODE_60_length_49438_cov_2.809617_1_39	39	31354	31575	-1
C15B_NODE_60_length_49438_cov_2.809617_1_40	40	31568	32929	-1	VOG00140	sp|P04308|ETF1_VACCW Early transcription factor 70 kDa subunit; XhXs	Xs;Xh
C15B_NODE_60_length_49438_cov_2.809617_1_41	41	32910	33248	-1
C15B_NODE_60_length_49438_cov_2.809617_1_42	42	33335	35584	-1	VOG02581	REFSEQ DNA primase/helicase; Xu	Xu
C15B_NODE_60_length_49438_cov_2.809617_1_43	43	35581	36003	-1
C15B_NODE_60_length_49438_cov_2.809617_1_44	44	35996	36199	-1
C15B_NODE_60_length_49438_cov_2.809617_1_45	45	36211	36858	-1	VOG00275	sp|O34449|YOQD_BACSU SPbeta prophage-derived putative antirepressor protein YoqD; Xu	Xu
C15B_NODE_60_length_49438_cov_2.809617_1_46	46	36918	37418	-1
C15B_NODE_60_length_49438_cov_2.809617_1_47	47	37694	37834	-1	VOG27789	REFSEQ hypothetical protein; Xu	Xu
C15B_NODE_60_length_49438_cov_2.809617_1_48	48	38059	39168	1
C15B_NODE_60_length_49438_cov_2.809617_1_49	49	39155	39397	1
C15B_NODE_60_length_49438_cov_2.809617_1_50	50	39372	39773	1
C15B_NODE_91_length_31916_cov_1.851143_full_1_1	1	1	231	1	VOG00234	sp|Q38584|HCP15_BPSPP Head completion protein gp15; XpXrXs	Xr;Xp;Xs
C15B_NODE_91_length_31916_cov_1.851143_full_1_2	2	241	555	1	VOG01650	REFSEQ hypothetical protein; Xu	Xu
C15B_NODE_91_length_31916_cov_1.851143_full_1_3	3	572	901	1
C15B_NODE_91_length_31916_cov_1.851143_full_1_4	4	898	1293	1	VOG01633	sp|O48448|COMPL_BPSPP Tail completion protein gp17; Xs	Xs
C15B_NODE_91_length_31916_cov_1.851143_full_1_5	5	1307	1870	1	VOG00970	sp|A9CRB8|TAIL_BPMR1 Putative tail protein; Xu	Xu
C15B_NODE_91_length_31916_cov_1.851143_full_1_6	6	1994	2332	1	VOG00358	REFSEQ hypothetical protein; Xu	Xu
C15B_NODE_91_length_31916_cov_1.851143_full_1_7	7	2425	2757	1	VOG03573	REFSEQ hypothetical protein; Xu	Xu
C15B_NODE_91_length_31916_cov_1.851143_full_1_8	8	2758	6255	1
C15B_NODE_91_length_31916_cov_1.851143_full_1_9	9	6274	7080	1	VOG00248	sp|O31977|YOMH_BACSU SPbeta prophage-derived uncharacterized protein YomH; Xu	Xu
C15B_NODE_91_length_31916_cov_1.851143_full_1_10	10	7077	11348	1	VOG02105	REFSEQ gp19; Xu	Xu
C15B_NODE_91_length_31916_cov_1.851143_full_1_11	11	11358	11645	1	VOG19302	REFSEQ hypothetical protein; Xu	Xu
C15B_NODE_91_length_31916_cov_1.851143_full_1_12	12	11645	11779	1
C15B_NODE_91_length_31916_cov_1.851143_full_1_13	13	11782	12033	1
C15B_NODE_91_length_31916_cov_1.851143_full_1_14	14	12033	12515	1	VOG18002	REFSEQ hypothetical protein; Xu	Xu
C15B_NODE_91_length_31916_cov_1.851143_full_1_15	15	12475	12828	1
C15B_NODE_91_length_31916_cov_1.851143_full_1_16	16	12821	13924	1	VOG25223	REFSEQ N-acetylmuramoyl-L-alanine amidase; Xu	Xu
C15C_NODE_124_length_23663_cov_10.055277_1	1	77	286	-1	VOG03384	REFSEQ hypothetical protein; Xu	Xu
C15C_NODE_124_length_23663_cov_10.055277_2	2	289	954	-1
C15C_NODE_124_length_23663_cov_10.055277_3	3	1156	1605	-1
C15C_NODE_124_length_23663_cov_10.055277_4	4	3096	3227	-1
C15C_NODE_124_length_23663_cov_10.055277_5	5	3893	4168	-1
C15C_NODE_124_length_23663_cov_10.055277_6	6	4314	4649	1
C15C_NODE_124_length_23663_cov_10.055277_7	7	5324	5905	-1
C15C_NODE_124_length_23663_cov_10.055277_8	8	5898	6428	-1
C15C_NODE_124_length_23663_cov_10.055277_9	9	6439	6987	-1
C15C_NODE_124_length_23663_cov_10.055277_10	10	6990	7136	-1
C15C_NODE_124_length_23663_cov_10.055277_11	11	7129	7428	-1
C15C_NODE_124_length_23663_cov_10.055277_12	12	7753	9210	-1	VOG02581	REFSEQ DNA primase/helicase; Xu	Xu
C15C_NODE_124_length_23663_cov_10.055277_13	13	9186	10076	-1
C15C_NODE_124_length_23663_cov_10.055277_14	14	10060	10308	-1
C15C_NODE_124_length_23663_cov_10.055277_15	15	10301	10513	-1
C15C_NODE_124_length_23663_cov_10.055277_16	16	10702	10968	-1
C15C_NODE_124_length_23663_cov_10.055277_17	17	11034	11234	-1
C15C_NODE_124_length_23663_cov_10.055277_18	18	11394	12077	1
C15C_NODE_124_length_23663_cov_10.055277_19	19	12532	13056	1
C15C_NODE_124_length_23663_cov_10.055277_20	20	13710	14033	-1
C15C_NODE_124_length_23663_cov_10.055277_21	21	14033	14428	-1	VOG00153	sp|Q03182|RINA_BPPHA Transcriptional activator rinA; Xu	Xu
C15C_NODE_124_length_23663_cov_10.055277_22	22	14431	14745	-1
C15C_NODE_124_length_23663_cov_10.055277_23	23	14857	15066	-1	VOG03384	REFSEQ hypothetical protein; Xu	Xu
C15C_NODE_124_length_23663_cov_10.055277_24	24	15070	15633	-1
C15C_NODE_124_length_23663_cov_10.055277_25	25	15834	16334	-1
C15C_NODE_124_length_23663_cov_10.055277_26	26	16579	16926	-1
C15C_NODE_124_length_23663_cov_10.055277_27	27	18276	18407	-1
C15C_NODE_124_length_23663_cov_10.055277_28	28	19073	19348	-1
C15C_NODE_124_length_23663_cov_10.055277_29	29	19494	19829	1
C15C_NODE_124_length_23663_cov_10.055277_30	30	20504	21085	-1
C15C_NODE_124_length_23663_cov_10.055277_31	31	21078	21608	-1
C15C_NODE_124_length_23663_cov_10.055277_32	32	21619	22167	-1
C15C_NODE_124_length_23663_cov_10.055277_33	33	22170	22316	-1
C15C_NODE_124_length_23663_cov_10.055277_34	34	22309	22608	-1
C15C_NODE_124_length_23663_cov_10.055277_35	35	22933	23661	-1
C15C_NODE_156_length_20443_cov_14.038492_1	1	2	121	1
C15C_NODE_156_length_20443_cov_14.038492_2	2	180	1247	-1	VOG00012	sp|P22877|INTR_SACER Integrase; XhXr	Xr;Xh
C15C_NODE_156_length_20443_cov_14.038492_3	3	1583	1810	1
C15C_NODE_156_length_20443_cov_14.038492_4	4	1782	2216	-1
C15C_NODE_156_length_20443_cov_14.038492_5	5	2182	2652	-1
C15C_NODE_156_length_20443_cov_14.038492_6	6	2736	3233	-1
C15C_NODE_156_length_20443_cov_14.038492_7	7	3347	3643	-1	VOG08907	REFSEQ hypothetical protein; Xu	Xu
C15C_NODE_156_length_20443_cov_14.038492_8	8	3713	4111	-1
C15C_NODE_156_length_20443_cov_14.038492_9	9	4115	4462	-1
C15C_NODE_156_length_20443_cov_14.038492_10	10	4721	4849	1
C15C_NODE_156_length_20443_cov_14.038492_11	11	4846	5055	-1
C15C_NODE_156_length_20443_cov_14.038492_12	12	5142	5369	1
C15C_NODE_156_length_20443_cov_14.038492_13	13	5380	6075	1	VOG01163	REFSEQ hypothetical protein; Xu	Xu
C15C_NODE_156_length_20443_cov_14.038492_14	14	6078	6365	1
C15C_NODE_156_length_20443_cov_14.038492_15	15	6349	6522	1
C15C_NODE_156_length_20443_cov_14.038492_16	16	6509	6733	1
C15C_NODE_156_length_20443_cov_14.038492_17	17	6723	6911	1
C15C_NODE_156_length_20443_cov_14.038492_18	18	6901	7428	1
C15C_NODE_156_length_20443_cov_14.038492_19	19	7507	7695	1
C15C_NODE_156_length_20443_cov_14.038492_20	20	7698	8339	1	VOG10058	sp|P04892|ERF_BPP22 Essential recombination function protein; Xh	Xh
C15C_NODE_156_length_20443_cov_14.038492_21	21	8339	9049	1	VOG02554	REFSEQ hypothetical protein; Xu	Xu
C15C_NODE_156_length_20443_cov_14.038492_22	22	9015	9491	1	VOG00805	sp|O21902|SSB_BPLSK SSB protein; Xh	Xh
C15C_NODE_156_length_20443_cov_14.038492_23	23	9502	10302	1	VOG08000	REFSEQ hypothetical protein; Xu	Xu
C15C_NODE_156_length_20443_cov_14.038492_24	24	10302	11027	1	VOG02491	sp|P15026|ISTB_PSEAI Insertion sequence IS21 putative ATP-binding protein; Xh	Xh
C15C_NODE_156_length_20443_cov_14.038492_25	25	11030	11398	1
C15C_NODE_156_length_20443_cov_14.038492_26	26	11462	11629	1
C15C_NODE_156_length_20443_cov_14.038492_27	27	12186	12578	1	VOG00153	sp|Q03182|RINA_BPPHA Transcriptional activator rinA; Xu	Xu
C15C_NODE_156_length_20443_cov_14.038492_28	28	13172	13891	1
C15C_NODE_156_length_20443_cov_14.038492_29	29	13906	14328	1	VOG00570	sp|P68928|TERS_BPSF6 Terminase small subunit; Xr	Xr
C15C_NODE_156_length_20443_cov_14.038492_30	30	14321	15601	1	VOG06541	sp|Q05219|VG13_BPML5 Gene 13 protein; Xu	Xu
C15C_NODE_156_length_20443_cov_14.038492_31	31	15610	17157	1	VOG00031	sp|Q05220|PORTL_BPML5 Portal protein; XpXrXs	Xr;Xp;Xs
C15C_NODE_156_length_20443_cov_14.038492_32	32	17144	18079	1
C15C_NODE_156_length_20443_cov_14.038492_33	33	18197	18772	1
C15C_NODE_156_length_20443_cov_14.038492_34	34	18791	19696	1	VOG17599	REFSEQ capsid protein; Xu	Xu
C15C_NODE_156_length_20443_cov_14.038492_35	35	19719	20000	1
C15C_NODE_156_length_20443_cov_14.038492_36	36	20011	20352	1	VOG00234	sp|Q38584|HCP15_BPSPP Head completion protein gp15; XpXrXs	Xr;Xp;Xs
C15C_NODE_156_length_20443_cov_14.038492_37	37	20352	20441	1
C15C_NODE_162_length_19868_cov_1.332557_full_1	1	3	110	1
C15C_NODE_162_length_19868_cov_1.332557_full_2	2	366	1049	1	VOG09672	sp|P04152|UMUC_ECOLI Protein UmuC; Xh	Xh
C15C_NODE_162_length_19868_cov_1.332557_full_3	3	1068	1463	1
C15C_NODE_162_length_19868_cov_1.332557_full_4	4	1453	1596	1
C15C_NODE_162_length_19868_cov_1.332557_full_5	5	1834	2562	-1
C15C_NODE_162_length_19868_cov_1.332557_full_6	6	2566	3324	-1	VOG16867	sp|P07620|PARA_ECOLX Plasmid partition protein A; Xh	Xh
C15C_NODE_162_length_19868_cov_1.332557_full_7	7	3334	3567	-1
C15C_NODE_162_length_19868_cov_1.332557_full_8	8	3825	4091	-1
C15C_NODE_162_length_19868_cov_1.332557_full_9	9	4351	4647	-1
C15C_NODE_162_length_19868_cov_1.332557_full_10	10	4881	6041	-1	VOG15495	REFSEQ putative replication protein; Xu	Xu
C15C_NODE_162_length_19868_cov_1.332557_full_11	11	6337	7059	-1	VOG01324	sp|P03034|RPC1_LAMBD Repressor protein cI; Xp	Xp
C15C_NODE_162_length_19868_cov_1.332557_full_12	12	7695	7994	1
C15C_NODE_162_length_19868_cov_1.332557_full_13	13	8451	8813	1
C15C_NODE_162_length_19868_cov_1.332557_full_14	14	9085	9522	1
C15C_NODE_162_length_19868_cov_1.332557_full_15	15	9540	10502	1
C15C_NODE_162_length_19868_cov_1.332557_full_16	16	10702	14433	1
C15C_NODE_162_length_19868_cov_1.332557_full_17	17	14456	14620	1
C15C_NODE_162_length_19868_cov_1.332557_full_18	18	14657	15634	1
C15C_NODE_162_length_19868_cov_1.332557_full_19	19	15638	16036	1
C15C_NODE_162_length_19868_cov_1.332557_full_20	20	16088	16315	1
C15C_NODE_162_length_19868_cov_1.332557_full_21	21	16327	17115	1
C15C_NODE_162_length_19868_cov_1.332557_full_22	22	17117	17470	1
C15C_NODE_162_length_19868_cov_1.332557_full_23	23	17424	19814	1
C15C_NODE_20_length_117275_cov_2.942790_0_partial_1	1	229	768	-1
C15C_NODE_20_length_117275_cov_2.942790_0_partial_2	2	765	1202	-1
C15C_NODE_20_length_117275_cov_2.942790_0_partial_3	3	1526	2530	1
C15C_NODE_20_length_117275_cov_2.942790_0_partial_4	4	2793	3302	1
C15C_NODE_20_length_117275_cov_2.942790_0_partial_5	5	3438	3713	1
C15C_NODE_20_length_117275_cov_2.942790_0_partial_6	6	3815	4051	1
C15C_NODE_20_length_117275_cov_2.942790_0_partial_7	7	4142	4681	1
C15C_NODE_20_length_117275_cov_2.942790_0_partial_8	8	4853	5416	1
C15C_NODE_20_length_117275_cov_2.942790_0_partial_9	9	6076	7197	-1	VOG00012	sp|P22877|INTR_SACER Integrase; XhXr	Xr;Xh
C15C_NODE_20_length_117275_cov_2.942790_0_partial_10	10	7324	7524	-1
C15C_NODE_20_length_117275_cov_2.942790_0_partial_11	11	7525	7929	-1
C15C_NODE_20_length_117275_cov_2.942790_0_partial_12	12	8047	8466	-1
C15C_NODE_20_length_117275_cov_2.942790_0_partial_13	13	8757	10184	-1	VOG02581	REFSEQ DNA primase/helicase; Xu	Xu
C15C_NODE_20_length_117275_cov_2.942790_0_partial_14	14	10171	10995	-1
C15C_NODE_20_length_117275_cov_2.942790_0_partial_15	15	10992	11174	-1
C15C_NODE_20_length_117275_cov_2.942790_0_partial_16	16	11171	11377	-1
C15C_NODE_20_length_117275_cov_2.942790_0_partial_17	17	11380	11637	-1
C15C_NODE_266_length_14469_cov_0.935644_1	1	1	603	-1	VOG01467	REFSEQ tail family protein; Xu	Xu
C15C_NODE_266_length_14469_cov_0.935644_2	2	603	5426	-1
C15C_NODE_266_length_14469_cov_0.935644_3	3	5430	6053	-1	VOG08829	REFSEQ Gp15 family bacterioprotein; Xu	Xu
C15C_NODE_266_length_14469_cov_0.935644_4	4	6059	6490	-1	VOG00496	REFSEQ hypothetical protein; Xu	Xu
C15C_NODE_266_length_14469_cov_0.935644_5	5	6543	7079	-1	VOG00687	sp|P85991|IGLVP_BPSK9 Ig-like virion protein; Xs	Xs
C15C_NODE_266_length_14469_cov_0.935644_6	6	7112	7516	-1	VOG00532	REFSEQ minor capsid protein; Xu	Xu
C15C_NODE_266_length_14469_cov_0.935644_7	7	7516	7866	-1	VOG00035	REFSEQ hypothetical protein; Xu	Xu
C15C_NODE_266_length_14469_cov_0.935644_8	8	7866	8219	-1	VOG01522	sp|Q04769|YG35_BPLLH Uncharacterized protein ORF5; Xu	Xu
C15C_NODE_266_length_14469_cov_0.935644_9	9	8216	8644	-1	VOG00996	sp|Q04768|YG34_BPLLH Uncharacterized protein ORF4; Xu	Xu
C15C_NODE_266_length_14469_cov_0.935644_10	10	8665	9552	-1	VOG02639	sp|P19727|CAPSB_BPT7 Minor capsid protein; XrXs	Xr;Xs
C15C_NODE_266_length_14469_cov_0.935644_11	11	9566	10147	-1	VOG16074	REFSEQ scaffold; Xu	Xu
C15C_NODE_266_length_14469_cov_0.935644_12	12	10249	11391	-1
C15C_NODE_266_length_14469_cov_0.935644_13	13	11388	12914	-1	VOG00031	sp|Q05220|PORTL_BPML5 Portal protein; XpXrXs	Xr;Xp;Xs
C15C_NODE_266_length_14469_cov_0.935644_14	14	12923	14266	-1	VOG06541	sp|Q05219|VG13_BPML5 Gene 13 protein; Xu	Xu
C15C_NODE_266_length_14469_cov_0.935644_15	15	14247	14468	-1
C15C_NODE_276_length_14165_cov_9.089329_1_1	1	386	751	1
C15C_NODE_276_length_14165_cov_9.089329_1_2	2	933	1271	1	VOG00063	sp|O48446|HCP16_BPSPP Head completion protein gp16; XpXrXs	Xr;Xp;Xs
C15C_NODE_276_length_14165_cov_9.089329_1_3	3	1276	1653	1
C15C_NODE_276_length_14165_cov_9.089329_1_4	4	2363	2806	1	VOG00623	REFSEQ P27 family terminase small subunit; Xu	Xu
C15C_NODE_276_length_14165_cov_9.089329_1_5	5	2803	4506	1	VOG06541	sp|Q05219|VG13_BPML5 Gene 13 protein; Xu	Xu
C15C_NODE_276_length_14165_cov_9.089329_1_6	6	4661	5761	1	VOG00045	sp|Q6QGD5|PORTL_BPT5 Portal protein; XhXpXrXs	Xr;Xs;Xp;Xh
C15C_NODE_276_length_14165_cov_9.089329_1_7	7	5758	7278	1	VOG00395	sp|O64210|CAPSD_BPMD2 Probable major capsid protein gp17; Xs	Xs
C15C_NODE_276_length_14165_cov_9.089329_1_8	8	7378	7647	1	VOG00089	REFSEQ head-tail connector protein; Xu	Xu
C15C_NODE_276_length_14165_cov_9.089329_1_9	9	7829	8188	1	VOG00667	sp|O34055|ARPU_BPO12 Putative autolysin regulatory protein ArpU; Xu	Xu
C15C_NODE_276_length_14165_cov_9.089329_1_10	10	8258	8764	1
C15C_NODE_276_length_14165_cov_9.089329_1_11	11	10006	11223	1
C15C_NODE_276_length_14165_cov_9.089329_1_12	12	11312	12394	1	VOG00187	sp|P34877|MTSA_LACLC Type II methyltransferase M1.ScrFI; XhXp	Xp;Xh
C15C_NODE_276_length_14165_cov_9.089329_1_13	13	12381	13109	1	VOG00606	sp|P14243|MTC9_CITFR Type II methyltransferase M.Cfr9I; XhXp	Xp;Xh
C15C_NODE_280_length_14077_cov_2.966523_1	1	2	289	-1
C15C_NODE_280_length_14077_cov_2.966523_2	2	291	611	-1
C15C_NODE_280_length_14077_cov_2.966523_3	3	598	828	-1
C15C_NODE_280_length_14077_cov_2.966523_4	4	852	1013	-1	VOG00087	sp|O31968|YOMP_BACSU SPbeta prophage-derived uncharacterized protein YomP; Xu	Xu
C15C_NODE_280_length_14077_cov_2.966523_5	5	1006	1341	-1
C15C_NODE_280_length_14077_cov_2.966523_6	6	1354	2598	-1
C15C_NODE_280_length_14077_cov_2.966523_7	7	2591	4159	-1
C15C_NODE_280_length_14077_cov_2.966523_8	8	4140	4559	-1
C15C_NODE_280_length_14077_cov_2.966523_9	9	4552	5742	-1	VOG01781	REFSEQ tail protein; Xu	Xu
C15C_NODE_280_length_14077_cov_2.966523_10	10	6518	10681	-1	VOG03675	REFSEQ tail protein; Xu	Xu
C15C_NODE_280_length_14077_cov_2.966523_11	11	10905	11264	-1	VOG01629	REFSEQ hypothetical protein; Xu	Xu
C15C_NODE_280_length_14077_cov_2.966523_12	12	11360	11971	-1	VOG01659	REFSEQ tail protein; Xu	Xu
C15C_NODE_280_length_14077_cov_2.966523_13	13	12008	12394	-1	VOG01028	REFSEQ DUF806 family protein; Xu	Xu
C15C_NODE_280_length_14077_cov_2.966523_14	14	12391	12870	-1
C15C_NODE_280_length_14077_cov_2.966523_15	15	12873	13208	-1	VOG00063	sp|O48446|HCP16_BPSPP Head completion protein gp16; XpXrXs	Xr;Xp;Xs
C15C_NODE_280_length_14077_cov_2.966523_16	16	13208	13501	-1
C15C_NODE_280_length_14077_cov_2.966523_17	17	13534	14076	-1
C15C_NODE_2_length_724735_cov_31.759834_1_partial_1_1	1	521	772	-1
C15C_NODE_2_length_724735_cov_31.759834_1_partial_1_2	2	772	1596	-1
C15C_NODE_2_length_724735_cov_31.759834_1_partial_1_3	3	1609	2076	-1
C15C_NODE_2_length_724735_cov_31.759834_1_partial_1_4	4	2470	2646	-1
C15C_NODE_2_length_724735_cov_31.759834_1_partial_1_5	5	2664	3074	-1	VOG27334	REFSEQ hypothetical protein; Xu	Xu
C15C_NODE_2_length_724735_cov_31.759834_1_partial_1_6	6	3150	4937	-1	VOG04267	REFSEQ hypothetical protein; Xu	Xu
C15C_NODE_2_length_724735_cov_31.759834_1_partial_1_7	7	4930	5070	-1
C15C_NODE_2_length_724735_cov_31.759834_1_partial_1_8	8	5080	5913	-1
C15C_NODE_2_length_724735_cov_31.759834_1_partial_1_9	9	5910	8492	-1	VOG22638	REFSEQ baseplate protein tal-like protein; Xu	Xu
C15C_NODE_2_length_724735_cov_31.759834_1_partial_1_10	10	8542	9291	-1
C15C_NODE_2_length_724735_cov_31.759834_1_partial_1_11	11	9297	10529	-1	VOG00248	sp|O31977|YOMH_BACSU SPbeta prophage-derived uncharacterized protein YomH; Xu	Xu
C15C_NODE_2_length_724735_cov_31.759834_1_partial_1_12	12	10522	16098	-1	VOG03675	REFSEQ tail protein; Xu	Xu
C15C_NODE_2_length_724735_cov_31.759834_1_partial_1_13	13	16098	16241	-1
C15C_NODE_2_length_724735_cov_31.759834_1_partial_1_14	14	16307	16684	-1	VOG01629	REFSEQ hypothetical protein; Xu	Xu
C15C_NODE_2_length_724735_cov_31.759834_1_partial_1_15	15	16743	17429	-1	VOG01659	REFSEQ tail protein; Xu	Xu
C15C_NODE_2_length_724735_cov_31.759834_1_partial_1_16	16	17430	17840	-1	VOG01028	REFSEQ DUF806 family protein; Xu	Xu
C15C_NODE_2_length_724735_cov_31.759834_1_partial_1_17	17	17819	18217	-1
C15C_NODE_2_length_724735_cov_31.759834_1_partial_1_18	18	18210	18572	-1	VOG00063	sp|O48446|HCP16_BPSPP Head completion protein gp16; XpXrXs	Xr;Xp;Xs
C15C_NODE_2_length_724735_cov_31.759834_1_partial_1_19	19	18562	18828	-1
C15C_NODE_2_length_724735_cov_31.759834_1_partial_1_20	20	18916	20157	-1	VOG00395	sp|O64210|CAPSD_BPMD2 Probable major capsid protein gp17; Xs	Xs
C15C_NODE_2_length_724735_cov_31.759834_1_partial_1_21	21	20161	20862	-1	VOG15472	REFSEQ ATP-dependent Clp protease proteolytic subunit; Xu	Xu
C15C_NODE_2_length_724735_cov_31.759834_1_partial_1_22	22	20843	21967	-1	VOG00045	sp|Q6QGD5|PORTL_BPT5 Portal protein; XhXpXrXs	Xr;Xs;Xp;Xh
C15C_NODE_2_length_724735_cov_31.759834_1_partial_1_23	23	22230	24125	-1	VOG04908	REFSEQ putative terminase small subunit; Xu	Xu
C15C_NODE_2_length_724735_cov_31.759834_1_partial_1_24	24	24125	24631	-1	VOG00623	REFSEQ P27 family terminase small subunit; Xu	Xu
C15C_NODE_2_length_724735_cov_31.759834_1_partial_1_25	25	25235	25690	-1
C15C_NODE_2_length_724735_cov_31.759834_1_partial_1_26	26	25668	26564	-1
C15C_NODE_2_length_724735_cov_31.759834_1_partial_1_27	27	26638	26814	-1
C15C_NODE_2_length_724735_cov_31.759834_1_partial_1_28	28	26908	27321	-1
C15C_NODE_2_length_724735_cov_31.759834_1_partial_1_29	29	27323	27523	-1
C15C_NODE_2_length_724735_cov_31.759834_1_partial_1_30	30	27924	30224	-1	VOG01314	sp|P10277|PRIM_BPP4 Putative P4-specific DNA primase; XhXr	Xr;Xh
C15C_NODE_2_length_724735_cov_31.759834_1_partial_1_31	31	30236	30820	-1	VOG00172	REFSEQ hypothetical protein; Xu	Xu
C15C_NODE_2_length_724735_cov_31.759834_1_partial_1_32	32	30846	32201	-1	VOG00561	sp|P20703|UVSW_BPT4 ATP-dependent DNA helicase uvsW; Xh	Xh
C15C_NODE_2_length_724735_cov_31.759834_1_partial_1_33	33	32204	32881	-1	VOG01381	sp|O31907|YORG_BACSU SPbeta prophage-derived uncharacterized protein YorG; Xu	Xu
C15C_NODE_2_length_724735_cov_31.759834_1_partial_1_34	34	32884	33741	-1	VOG02848	REFSEQ DUF1351 domain-containing protein; Xu	Xu
C15C_NODE_2_length_724735_cov_31.759834_1_partial_1_35	35	33761	34030	-1
C15C_NODE_2_length_724735_cov_31.759834_1_partial_1_36	36	34297	34509	1
C15C_NODE_2_length_724735_cov_31.759834_1_partial_1_37	37	34478	34672	-1
C15C_NODE_2_length_724735_cov_31.759834_1_partial_1_38	38	34843	35118	1
C15C_NODE_2_length_724735_cov_31.759834_1_partial_1_39	39	35124	35450	-1	VOG00298	REFSEQ DUF771 domain-containing protein; Xu	Xu
C15C_NODE_2_length_724735_cov_31.759834_1_partial_1_40	40	35499	35948	1
C15C_NODE_2_length_724735_cov_31.759834_1_partial_1_41	41	35923	36120	-1
C15C_NODE_455_length_10210_cov_0.816027_1	1	2	1066	1	VOG06541	sp|Q05219|VG13_BPML5 Gene 13 protein; Xu	Xu
C15C_NODE_455_length_10210_cov_0.816027_2	2	1093	2631	1	VOG00031	sp|Q05220|PORTL_BPML5 Portal protein; XpXrXs	Xr;Xp;Xs
C15C_NODE_455_length_10210_cov_0.816027_3	3	2651	3355	1	VOG10100	REFSEQ hypothetical protein; Xu	Xu
C15C_NODE_455_length_10210_cov_0.816027_4	4	3404	3592	1
C15C_NODE_455_length_10210_cov_0.816027_5	5	3735	4388	1	VOG17837	sp|Q05222|SCAF_BPML5 Probable capsid assembly scaffolding protein; Xs	Xs
C15C_NODE_455_length_10210_cov_0.816027_6	6	4388	5209	1	VOG24106	sp|A0A0H5AXT3|CAPSD_BPK21 Major capsid protein; Xs	Xs
C15C_NODE_455_length_10210_cov_0.816027_7	7	5181	5504	-1
C15C_NODE_455_length_10210_cov_0.816027_8	8	5544	5882	1	VOG00234	sp|Q38584|HCP15_BPSPP Head completion protein gp15; XpXrXs	Xr;Xp;Xs
C15C_NODE_455_length_10210_cov_0.816027_9	9	5879	6157	1	VOG01650	REFSEQ hypothetical protein; Xu	Xu
C15C_NODE_455_length_10210_cov_0.816027_10	10	6150	6524	1	VOG02497	REFSEQ HK97 gp10 family protein; Xu	Xu
C15C_NODE_455_length_10210_cov_0.816027_11	11	6524	6877	1	VOG01633	sp|O48448|COMPL_BPSPP Tail completion protein gp17; Xs	Xs
C15C_NODE_455_length_10210_cov_0.816027_12	12	6897	7685	1	VOG00970	sp|A9CRB8|TAIL_BPMR1 Putative tail protein; Xu	Xu
C15C_NODE_455_length_10210_cov_0.816027_13	13	7706	8119	1	VOG00358	REFSEQ hypothetical protein; Xu	Xu
C15C_NODE_455_length_10210_cov_0.816027_14	14	8134	8436	1	VOG03986	REFSEQ hypothetical protein; Xu	Xu
C15C_NODE_455_length_10210_cov_0.816027_15	15	8440	10209	1
C15C_NODE_478_length_10031_cov_0.766761_1	1	1	1290	-1
C15C_NODE_478_length_10031_cov_0.766761_2	2	1290	1547	-1
C15C_NODE_478_length_10031_cov_0.766761_3	3	1622	2140	-1	VOG00358	REFSEQ hypothetical protein; Xu	Xu
C15C_NODE_478_length_10031_cov_0.766761_4	4	2169	2822	-1
C15C_NODE_478_length_10031_cov_0.766761_5	5	2871	3266	-1
C15C_NODE_478_length_10031_cov_0.766761_6	6	3269	3760	-1
C15C_NODE_478_length_10031_cov_0.766761_7	7	3761	4093	-1
C15C_NODE_478_length_10031_cov_0.766761_8	8	4090	4458	-1	VOG00234	sp|Q38584|HCP15_BPSPP Head completion protein gp15; XpXrXs	Xr;Xp;Xs
C15C_NODE_478_length_10031_cov_0.766761_9	9	4476	5585	-1	VOG00864	sp|D6RRG1|CAPSD_BPKPP Major capsid protein; XhXs	Xs;Xh
C15C_NODE_478_length_10031_cov_0.766761_10	10	5601	5972	-1	VOG03276	REFSEQ hypothetical protein; Xu	Xu
C15C_NODE_478_length_10031_cov_0.766761_11	11	5986	6645	-1
C15C_NODE_478_length_10031_cov_0.766761_12	12	6756	7667	-1
C15C_NODE_478_length_10031_cov_0.766761_13	13	7667	9403	-1	VOG00031	sp|Q05220|PORTL_BPML5 Portal protein; XpXrXs	Xr;Xp;Xs
C15C_NODE_478_length_10031_cov_0.766761_14	14	9418	10029	-1	VOG25626	REFSEQ PBSX family terminase large subunit; Xu	Xu
C2A_NODE_151_length_20865_cov_1.303983_1	1	1	231	1
C2A_NODE_151_length_20865_cov_1.303983_2	2	254	679	1	VOG00996	sp|Q04768|YG34_BPLLH Uncharacterized protein ORF4; Xu	Xu
C2A_NODE_151_length_20865_cov_1.303983_3	3	657	1025	1	VOG01522	sp|Q04769|YG35_BPLLH Uncharacterized protein ORF5; Xu	Xu
C2A_NODE_151_length_20865_cov_1.303983_4	4	1025	1381	1
C2A_NODE_151_length_20865_cov_1.303983_5	5	1381	1779	1	VOG00532	REFSEQ minor capsid protein; Xu	Xu
C2A_NODE_151_length_20865_cov_1.303983_6	6	1784	2275	1	VOG00687	sp|P85991|IGLVP_BPSK9 Ig-like virion protein; Xs	Xs
C2A_NODE_151_length_20865_cov_1.303983_7	7	2362	2775	1
C2A_NODE_151_length_20865_cov_1.303983_8	8	2775	3401	1	VOG08829	REFSEQ Gp15 family bacterioprotein; Xu	Xu
C2A_NODE_151_length_20865_cov_1.303983_9	9	3422	7720	1	VOG00710	REFSEQ tape measure protein; Xu	Xu
C2A_NODE_151_length_20865_cov_1.303983_10	10	7710	8549	1	VOG01467	REFSEQ tail family protein; Xu	Xu
C2A_NODE_151_length_20865_cov_1.303983_11	11	8549	9694	1	VOG00378	REFSEQ tail protein; Xu	Xu
C2A_NODE_151_length_20865_cov_1.303983_12	12	9657	9905	1
C2A_NODE_151_length_20865_cov_1.303983_13	13	9850	10110	1
C2A_NODE_151_length_20865_cov_1.303983_14	14	10110	13925	1
C2A_NODE_151_length_20865_cov_1.303983_15	15	13940	15688	1
C2A_NODE_151_length_20865_cov_1.303983_16	16	15700	18144	1	VOG00317	REFSEQ hypothetical protein; Xu	Xu
C2A_NODE_151_length_20865_cov_1.303983_17	17	18158	19966	1	VOG02772	REFSEQ minor tail protein; Xu	Xu
C2A_NODE_151_length_20865_cov_1.303983_18	18	19976	20467	1
C2A_NODE_151_length_20865_cov_1.303983_19	19	20469	20864	1
C2A_NODE_263_length_15094_cov_1.364068_1	1	3	338	-1
C2A_NODE_263_length_15094_cov_1.364068_2	2	338	1039	-1	VOG00325	sp|P51772|BPX_BPP2 Baseplate protein X; XhXs	Xs;Xh
C2A_NODE_263_length_15094_cov_1.364068_3	3	1049	3907	-1
C2A_NODE_263_length_15094_cov_1.364068_4	4	3910	4065	1
C2A_NODE_263_length_15094_cov_1.364068_5	5	4174	4602	-1	VOG04110	sp|P45930|YQBN_BACSU Uncharacterized protein YqbN; Xu	Xu
C2A_NODE_263_length_15094_cov_1.364068_6	6	4619	5074	-1	VOG07901	sp|P45929|YQBM_BACSU Uncharacterized protein YqbM; Xu	Xu
C2A_NODE_263_length_15094_cov_1.364068_7	7	5089	6456	-1	VOG00614	sp|P85225|VPN1_BPPHE Putative tail sheath protein; Xs	Xs
C2A_NODE_263_length_15094_cov_1.364068_8	8	6456	6857	-1
C2A_NODE_263_length_15094_cov_1.364068_9	9	6850	7281	-1	VOG02258	REFSEQ hypothetical protein; Xu	Xu
C2A_NODE_263_length_15094_cov_1.364068_10	10	7285	7692	-1	VOG00110	REFSEQ HK97 gp10 family protein; Xu	Xu
C2A_NODE_263_length_15094_cov_1.364068_11	11	7704	8087	-1	VOG06744	REFSEQ hypothetical protein; Xu	Xu
C2A_NODE_263_length_15094_cov_1.364068_12	12	8072	8485	-1
C2A_NODE_263_length_15094_cov_1.364068_13	13	8495	8875	-1
C2A_NODE_263_length_15094_cov_1.364068_14	14	8887	9876	-1	VOG24106	sp|A0A0H5AXT3|CAPSD_BPK21 Major capsid protein; Xs	Xs
C2A_NODE_263_length_15094_cov_1.364068_15	15	9887	10468	-1	VOG16074	REFSEQ scaffold; Xu	Xu
C2A_NODE_263_length_15094_cov_1.364068_16	16	10943	11335	-1
C2A_NODE_263_length_15094_cov_1.364068_17	17	11352	13946	-1	VOG01422	sp|Q38442|GP7_BPSPP Minor head protein GP7; XhXs	Xs;Xh
C2A_NODE_263_length_15094_cov_1.364068_18	18	13961	14527	-1
C2A_NODE_263_length_15094_cov_1.364068_19	19	14668	15093	-1
C2A_NODE_288_length_14252_cov_1.450549_1	1	446	703	-1
C2A_NODE_288_length_14252_cov_1.450549_2	2	1335	1799	-1
C2A_NODE_288_length_14252_cov_1.450549_3	3	1810	2157	-1
C2A_NODE_288_length_14252_cov_1.450549_4	4	2419	2679	1
C2A_NODE_288_length_14252_cov_1.450549_5	5	2928	3542	1
C2A_NODE_288_length_14252_cov_1.450549_6	6	3631	4002	1
C2A_NODE_288_length_14252_cov_1.450549_7	7	3999	4190	1
C2A_NODE_288_length_14252_cov_1.450549_8	8	4203	4454	1
C2A_NODE_288_length_14252_cov_1.450549_9	9	4447	4797	1
C2A_NODE_288_length_14252_cov_1.450549_10	10	4904	5188	1
C2A_NODE_288_length_14252_cov_1.450549_11	11	5185	6078	1
C2A_NODE_288_length_14252_cov_1.450549_12	12	6094	7566	1	VOG02581	REFSEQ DNA primase/helicase; Xu	Xu
C2A_NODE_288_length_14252_cov_1.450549_13	13	7860	7970	1
C2A_NODE_288_length_14252_cov_1.450549_14	14	8283	8669	1
C2A_NODE_288_length_14252_cov_1.450549_15	15	8671	9381	1
C2A_NODE_288_length_14252_cov_1.450549_16	16	9909	10340	1
C2A_NODE_288_length_14252_cov_1.450549_17	17	10741	11319	1
C2A_NODE_288_length_14252_cov_1.450549_18	18	11383	11550	-1
C2A_NODE_288_length_14252_cov_1.450549_19	19	12117	13331	-1	VOG00012	sp|P22877|INTR_SACER Integrase; XhXr	Xr;Xh
C2A_NODE_288_length_14252_cov_1.450549_20	20	13548	13703	-1
C2A_NODE_288_length_14252_cov_1.450549_21	21	13777	13953	-1
C2A_NODE_324_length_13419_cov_16.683494_1	1	86	985	-1	VOG05678	REFSEQ N-acetylmuramoyl-L-alanine amidase; Xu	Xu
C2A_NODE_324_length_13419_cov_16.683494_2	2	985	1299	-1
C2A_NODE_324_length_13419_cov_16.683494_3	3	1302	1526	-1
C2A_NODE_324_length_13419_cov_16.683494_4	4	1541	1789	-1
C2A_NODE_324_length_13419_cov_16.683494_5	5	1779	1919	-1
C2A_NODE_324_length_13419_cov_16.683494_6	6	1900	7389	-1	VOG20182	REFSEQ hypothetical protein; Xu	Xu
C2A_NODE_324_length_13419_cov_16.683494_7	7	7386	8117	-1	VOG00248	sp|O31977|YOMH_BACSU SPbeta prophage-derived uncharacterized protein YomH; Xu	Xu
C2A_NODE_324_length_13419_cov_16.683494_8	8	8130	13232	-1	VOG13342	REFSEQ hypothetical protein; Xu	Xu
C2A_NODE_324_length_13419_cov_16.683494_9	9	13247	13417	-1
C2A_NODE_349_length_13033_cov_3.792345_full_1	1	3	332	-1
C2A_NODE_349_length_13033_cov_3.792345_full_2	2	436	963	-1
C2A_NODE_349_length_13033_cov_3.792345_full_3	3	1032	1412	-1
C2A_NODE_349_length_13033_cov_3.792345_full_4	4	1688	2347	-1
C2A_NODE_349_length_13033_cov_3.792345_full_5	5	2481	3443	-1
C2A_NODE_349_length_13033_cov_3.792345_full_6	6	3655	3807	-1
C2A_NODE_349_length_13033_cov_3.792345_full_7	7	3804	4115	-1
C2A_NODE_349_length_13033_cov_3.792345_full_8	8	4132	4500	-1
C2A_NODE_349_length_13033_cov_3.792345_full_9	9	4717	5022	1
C2A_NODE_349_length_13033_cov_3.792345_full_10	10	5019	5282	1
C2A_NODE_349_length_13033_cov_3.792345_full_11	11	5279	5392	1
C2A_NODE_349_length_13033_cov_3.792345_full_12	12	5389	5550	1
C2A_NODE_349_length_13033_cov_3.792345_full_13	13	5552	5770	1
C2A_NODE_349_length_13033_cov_3.792345_full_14	14	5777	6100	1
C2A_NODE_349_length_13033_cov_3.792345_full_15	15	6097	6417	1
C2A_NODE_349_length_13033_cov_3.792345_full_16	16	6420	6626	1
C2A_NODE_349_length_13033_cov_3.792345_full_17	17	6623	6805	1
C2A_NODE_349_length_13033_cov_3.792345_full_18	18	6802	7626	1
C2A_NODE_349_length_13033_cov_3.792345_full_19	19	7613	9040	1	VOG02581	REFSEQ DNA primase/helicase; Xu	Xu
C2A_NODE_349_length_13033_cov_3.792345_full_20	20	9331	9750	1
C2A_NODE_349_length_13033_cov_3.792345_full_21	21	9868	10272	1
C2A_NODE_349_length_13033_cov_3.792345_full_22	22	10273	10473	1
C2A_NODE_349_length_13033_cov_3.792345_full_23	23	10600	11721	1	VOG00012	sp|P22877|INTR_SACER Integrase; XhXr	Xr;Xh
C2A_NODE_349_length_13033_cov_3.792345_full_24	24	12384	12923	-1
C2A_NODE_378_length_12471_cov_0.960467_1	1	1	366	-1
C2A_NODE_378_length_12471_cov_0.960467_2	2	589	1689	-1
C2A_NODE_378_length_12471_cov_0.960467_3	3	1670	1996	-1
C2A_NODE_378_length_12471_cov_0.960467_4	4	1950	2159	-1
C2A_NODE_378_length_12471_cov_0.960467_5	5	2205	2390	-1
C2A_NODE_378_length_12471_cov_0.960467_6	6	2383	2727	-1
C2A_NODE_378_length_12471_cov_0.960467_7	7	2775	4142	-1
C2A_NODE_378_length_12471_cov_0.960467_8	8	4139	4558	-1
C2A_NODE_378_length_12471_cov_0.960467_9	9	4619	4990	-1
C2A_NODE_378_length_12471_cov_0.960467_10	10	4987	6096	-1	VOG00378	REFSEQ tail protein; Xu	Xu
C2A_NODE_378_length_12471_cov_0.960467_11	11	6096	6965	-1	VOG01467	REFSEQ tail family protein; Xu	Xu
C2A_NODE_378_length_12471_cov_0.960467_12	12	6922	10695	-1	VOG00049	REFSEQ hypothetical protein; Xu	Xu
C2A_NODE_378_length_12471_cov_0.960467_13	13	10727	11374	-1	VOG08829	REFSEQ Gp15 family bacterioprotein; Xu	Xu
C2A_NODE_378_length_12471_cov_0.960467_14	14	11393	11827	-1
C2A_NODE_378_length_12471_cov_0.960467_15	15	11941	12471	-1	VOG00687	sp|P85991|IGLVP_BPSK9 Ig-like virion protein; Xs	Xs
C2A_NODE_399_length_12024_cov_16.523157_1	1	3	161	-1
C2A_NODE_399_length_12024_cov_16.523157_2	2	165	509	-1
C2A_NODE_399_length_12024_cov_16.523157_3	3	784	1002	1
C2A_NODE_399_length_12024_cov_16.523157_4	4	1015	1746	1	VOG00275	sp|O34449|YOQD_BACSU SPbeta prophage-derived putative antirepressor protein YoqD; Xu	Xu
C2A_NODE_399_length_12024_cov_16.523157_5	5	1750	1983	1
C2A_NODE_399_length_12024_cov_16.523157_6	6	1986	2219	1
C2A_NODE_399_length_12024_cov_16.523157_7	7	2284	2673	1
C2A_NODE_399_length_12024_cov_16.523157_8	8	2660	3136	1	VOG25406	REFSEQ siphovirus Gp157 family protein; Xu	Xu
C2A_NODE_399_length_12024_cov_16.523157_9	9	3155	3829	1	VOG01381	sp|O31907|YORG_BACSU SPbeta prophage-derived uncharacterized protein YorG; Xu	Xu
C2A_NODE_399_length_12024_cov_16.523157_10	10	3856	4416	1
C2A_NODE_399_length_12024_cov_16.523157_11	11	4420	5301	1
C2A_NODE_399_length_12024_cov_16.523157_12	12	5298	6710	1
C2A_NODE_399_length_12024_cov_16.523157_13	13	6957	7430	1
C2A_NODE_399_length_12024_cov_16.523157_14	14	7423	7776	1
C2A_NODE_399_length_12024_cov_16.523157_15	15	7814	8407	1	VOG02330	REFSEQ hypothetical protein; Xu	Xu
C2A_NODE_399_length_12024_cov_16.523157_16	16	8578	8694	1
C2A_NODE_399_length_12024_cov_16.523157_17	17	8687	9121	1
C2A_NODE_399_length_12024_cov_16.523157_18	18	9118	9303	1
C2A_NODE_399_length_12024_cov_16.523157_19	19	9303	9539	1
C2A_NODE_399_length_12024_cov_16.523157_20	20	9539	9886	1	VOG00181	sp|O34401|YOPX_BACSU SPbeta prophage-derived uncharacterized protein YopX; Xu	Xu
C2A_NODE_399_length_12024_cov_16.523157_21	21	9889	10122	1	VOG01898	REFSEQ hypothetical protein; Xu	Xu
C2A_NODE_399_length_12024_cov_16.523157_22	22	10129	10566	1
C2A_NODE_399_length_12024_cov_16.523157_23	23	10550	11263	1	VOG02412	sp|D2ZZC1|PNUC_NEIMU Nicotinamide riboside transporter PnuC; Xh	Xh
C2A_NODE_399_length_12024_cov_16.523157_24	24	11264	11551	1
C2A_NODE_399_length_12024_cov_16.523157_25	25	11554	11994	1	VOG00153	sp|Q03182|RINA_BPPHA Transcriptional activator rinA; Xu	Xu
C2A_NODE_9_length_109088_cov_8.302778_full_1_1	1	597	1850	-1
C2A_NODE_9_length_109088_cov_8.302778_full_1_2	2	1855	2313	-1	VOG02537	REFSEQ hypothetical protein; Xu	Xu
C2A_NODE_9_length_109088_cov_8.302778_full_1_3	3	2314	2631	-1
C2A_NODE_9_length_109088_cov_8.302778_full_1_4	4	2618	2848	-1
C2A_NODE_9_length_109088_cov_8.302778_full_1_5	5	2868	4061	-1
C2A_NODE_9_length_109088_cov_8.302778_full_1_6	6	4067	4459	-1
C2A_NODE_9_length_109088_cov_8.302778_full_1_7	7	4456	5310	-1
C2A_NODE_9_length_109088_cov_8.302778_full_1_8	8	5310	6386	-1	VOG01781	REFSEQ tail protein; Xu	Xu
C2A_NODE_9_length_109088_cov_8.302778_full_1_9	9	6387	7202	-1	VOG01467	REFSEQ tail family protein; Xu	Xu
C2A_NODE_9_length_109088_cov_8.302778_full_1_10	10	7222	11196	-1	VOG03675	REFSEQ tail protein; Xu	Xu
C2A_NODE_9_length_109088_cov_8.302778_full_1_11	11	11215	11403	-1
C2A_NODE_9_length_109088_cov_8.302778_full_1_12	12	11421	11771	-1	VOG01629	REFSEQ hypothetical protein; Xu	Xu
C2A_NODE_9_length_109088_cov_8.302778_full_1_13	13	11902	12513	-1	VOG01659	REFSEQ tail protein; Xu	Xu
C2A_NODE_9_length_109088_cov_8.302778_full_1_14	14	12550	12936	-1	VOG01028	REFSEQ DUF806 family protein; Xu	Xu
C2A_NODE_9_length_109088_cov_8.302778_full_1_15	15	12933	13412	-1
C2A_NODE_9_length_109088_cov_8.302778_full_1_16	16	13416	13742	-1	VOG00063	sp|O48446|HCP16_BPSPP Head completion protein gp16; XpXrXs	Xr;Xp;Xs
C2A_NODE_9_length_109088_cov_8.302778_full_1_17	17	13729	14046	-1	VOG00089	REFSEQ head-tail connector protein; Xu	Xu
C2A_NODE_9_length_109088_cov_8.302778_full_1_18	18	14063	15286	-1	VOG00395	sp|O64210|CAPSD_BPMD2 Probable major capsid protein gp17; Xs	Xs
C2A_NODE_9_length_109088_cov_8.302778_full_1_19	19	15306	16007	-1	VOG15472	REFSEQ ATP-dependent Clp protease proteolytic subunit; Xu	Xu
C2A_NODE_9_length_109088_cov_8.302778_full_1_20	20	15994	17157	-1	VOG00045	sp|Q6QGD5|PORTL_BPT5 Portal protein; XhXpXrXs	Xr;Xs;Xp;Xh
C2A_NODE_9_length_109088_cov_8.302778_full_1_21	21	17164	17415	-1
C2A_NODE_9_length_109088_cov_8.302778_full_1_22	22	17366	19246	-1	VOG04908	REFSEQ putative terminase small subunit; Xu	Xu
C2A_NODE_9_length_109088_cov_8.302778_full_1_23	23	19236	19718	-1	VOG00623	REFSEQ P27 family terminase small subunit; Xu	Xu
C2A_NODE_9_length_109088_cov_8.302778_full_1_24	24	19903	20442	-1	VOG00802	REFSEQ hypothetical protein; Xu	Xu
C2A_NODE_9_length_109088_cov_8.302778_full_1_25	25	20520	21098	-1
C2A_NODE_9_length_109088_cov_8.302778_full_1_26	26	21815	22021	-1	VOG13838	sp|Q9CHE9|YHJA_LACLA UPF0337 protein YhjA; Xu	Xu
C2A_NODE_9_length_109088_cov_8.302778_full_1_27	27	22118	22543	-1	VOG00667	sp|O34055|ARPU_BPO12 Putative autolysin regulatory protein ArpU; Xu	Xu
C2A_NODE_9_length_109088_cov_8.302778_full_1_28	28	22810	23004	-1
C2A_NODE_9_length_109088_cov_8.302778_full_1_29	29	23004	23597	-1
C2A_NODE_9_length_109088_cov_8.302778_full_1_30	30	23615	23980	-1
C2A_NODE_9_length_109088_cov_8.302778_full_1_31	31	23980	24126	-1
C2A_NODE_9_length_109088_cov_8.302778_full_1_32	32	24178	24690	-1
C2A_NODE_9_length_109088_cov_8.302778_full_1_33	33	24743	25273	-1
C2A_NODE_9_length_109088_cov_8.302778_full_1_34	34	25327	25602	1
C2A_NODE_9_length_109088_cov_8.302778_full_1_35	35	25769	26098	-1
C2A_NODE_9_length_109088_cov_8.302778_full_1_36	36	26109	26600	-1	VOG00805	sp|O21902|SSB_BPLSK SSB protein; Xh	Xh
C2A_NODE_9_length_109088_cov_8.302778_full_1_37	37	26566	27276	-1	VOG02554	REFSEQ hypothetical protein; Xu	Xu
C2A_NODE_9_length_109088_cov_8.302778_full_1_38	38	27276	27917	-1	VOG10058	sp|P04892|ERF_BPP22 Essential recombination function protein; Xh	Xh
C2A_NODE_9_length_109088_cov_8.302778_full_1_39	39	27919	28101	-1
C2A_NODE_9_length_109088_cov_8.302778_full_1_40	40	28094	28237	-1
C2A_NODE_9_length_109088_cov_8.302778_full_1_41	41	28319	28846	-1
C2A_NODE_9_length_109088_cov_8.302778_full_1_42	42	29014	29238	-1
C2A_NODE_9_length_109088_cov_8.302778_full_1_43	43	29225	29389	-1
C2A_NODE_9_length_109088_cov_8.302778_full_1_44	44	29386	29622	-1
C2A_NODE_9_length_109088_cov_8.302778_full_1_45	45	29628	29837	-1
C2A_NODE_9_length_109088_cov_8.302778_full_1_46	46	29857	30609	-1	VOG01163	REFSEQ hypothetical protein; Xu	Xu
C2A_NODE_9_length_109088_cov_8.302778_full_1_47	47	30629	30856	-1
C2A_NODE_9_length_109088_cov_8.302778_full_1_48	48	31121	31465	1
C2A_NODE_9_length_109088_cov_8.302778_full_1_49	49	31462	31869	1
C2A_NODE_9_length_109088_cov_8.302778_full_1_50	50	32090	32455	1
C2A_NODE_9_length_109088_cov_8.302778_full_1_51	51	32529	32900	1
C2A_NODE_9_length_109088_cov_8.302778_full_1_52	52	33008	33109	1
C2B_NODE_125_length_24045_cov_10.820888_1	1	3	296	-1
C2B_NODE_125_length_24045_cov_10.820888_2	2	362	943	-1	VOG01659	REFSEQ tail protein; Xu	Xu
C2B_NODE_125_length_24045_cov_10.820888_3	3	958	1347	-1
C2B_NODE_125_length_24045_cov_10.820888_4	4	1344	1748	-1	VOG17674	REFSEQ hypothetical protein; Xu	Xu
C2B_NODE_125_length_24045_cov_10.820888_5	5	1741	2127	-1
C2B_NODE_125_length_24045_cov_10.820888_6	6	2093	2425	-1	VOG03921	REFSEQ head-tail adapter protein; Xu	Xu
C2B_NODE_125_length_24045_cov_10.820888_7	7	2443	2700	-1
C2B_NODE_125_length_24045_cov_10.820888_8	8	2764	3885	-1	VOG00323	sp|P85500|CAPSD_BPPAJ Capsid polyprotein; XhXs	Xs;Xh
C2B_NODE_125_length_24045_cov_10.820888_9	9	3885	4658	-1	VOG15472	REFSEQ ATP-dependent Clp protease proteolytic subunit; Xu	Xu
C2B_NODE_125_length_24045_cov_10.820888_10	10	4645	5838	-1	VOG00045	sp|Q6QGD5|PORTL_BPT5 Portal protein; XhXpXrXs	Xr;Xs;Xp;Xh
C2B_NODE_125_length_24045_cov_10.820888_11	11	6030	7769	-1	VOG06541	sp|Q05219|VG13_BPML5 Gene 13 protein; Xu	Xu
C2B_NODE_125_length_24045_cov_10.820888_12	12	7766	8359	-1	VOG04012	REFSEQ P27 family terminase small subunit; Xu	Xu
C2B_NODE_125_length_24045_cov_10.820888_13	13	8501	8800	-1	VOG00802	REFSEQ hypothetical protein; Xu	Xu
C2B_NODE_125_length_24045_cov_10.820888_14	14	8849	9148	-1
C2B_NODE_125_length_24045_cov_10.820888_15	15	9225	9536	-1
C2B_NODE_125_length_24045_cov_10.820888_16	16	9656	10000	-1
C2B_NODE_125_length_24045_cov_10.820888_17	17	10046	10390	-1
C2B_NODE_125_length_24045_cov_10.820888_18	18	10508	10918	-1
C2B_NODE_125_length_24045_cov_10.820888_19	19	11025	12086	-1	VOG00606	sp|P14243|MTC9_CITFR Type II methyltransferase M.Cfr9I; XhXp	Xp;Xh
C2B_NODE_125_length_24045_cov_10.820888_20	20	12198	13010	-1
C2B_NODE_125_length_24045_cov_10.820888_21	21	13065	14378	-1	VOG00187	sp|P34877|MTSA_LACLC Type II methyltransferase M1.ScrFI; XhXp	Xp;Xh
C2B_NODE_125_length_24045_cov_10.820888_22	22	14419	15054	-1	VOG19807	REFSEQ hypothetical protein; Xu	Xu
C2B_NODE_125_length_24045_cov_10.820888_23	23	15051	15734	-1	VOG27436	REFSEQ gp125; Xu	Xu
C2B_NODE_125_length_24045_cov_10.820888_24	24	15731	15904	-1
C2B_NODE_125_length_24045_cov_10.820888_25	25	15904	16140	-1
C2B_NODE_125_length_24045_cov_10.820888_26	26	16116	16271	-1
C2B_NODE_125_length_24045_cov_10.820888_27	27	16275	16784	-1
C2B_NODE_125_length_24045_cov_10.820888_28	28	16781	17179	-1
C2B_NODE_125_length_24045_cov_10.820888_29	29	17172	18074	-1	VOG23450	REFSEQ hypothetical protein; Xu	Xu
C2B_NODE_125_length_24045_cov_10.820888_30	30	18085	18519	-1	VOG00805	sp|O21902|SSB_BPLSK SSB protein; Xh	Xh
C2B_NODE_125_length_24045_cov_10.820888_31	31	18509	18730	-1
C2B_NODE_125_length_24045_cov_10.820888_32	32	18727	18891	-1
C2B_NODE_125_length_24045_cov_10.820888_33	33	18979	19230	-1
C2B_NODE_125_length_24045_cov_10.820888_34	34	19232	19348	-1
C2B_NODE_125_length_24045_cov_10.820888_35	35	19370	20092	-1
C2B_NODE_125_length_24045_cov_10.820888_36	36	20128	20352	-1
C2B_NODE_125_length_24045_cov_10.820888_37	37	20521	21078	1
C2B_NODE_125_length_24045_cov_10.820888_38	38	21089	21676	1	VOG00414	sp|P10426|YIM2_BPPH1 Uncharacterized immunity region protein 2; Xu	Xu
C2B_NODE_125_length_24045_cov_10.820888_39	39	21735	22571	1
C2B_NODE_125_length_24045_cov_10.820888_40	40	22712	23842	1	VOG00012	sp|P22877|INTR_SACER Integrase; XhXr	Xr;Xh
C2B_NODE_125_length_24045_cov_10.820888_41	41	23961	24044	-1
C2B_NODE_140_length_22790_cov_1.426643_1	1	3	335	-1	VOG01659	REFSEQ tail protein; Xu	Xu
C2B_NODE_140_length_22790_cov_1.426643_2	2	370	756	-1	VOG01028	REFSEQ DUF806 family protein; Xu	Xu
C2B_NODE_140_length_22790_cov_1.426643_3	3	757	1233	-1
C2B_NODE_140_length_22790_cov_1.426643_4	4	1236	1571	-1	VOG00063	sp|O48446|HCP16_BPSPP Head completion protein gp16; XpXrXs	Xr;Xp;Xs
C2B_NODE_140_length_22790_cov_1.426643_5	5	1571	1864	-1
C2B_NODE_140_length_22790_cov_1.426643_6	6	2012	3247	-1	VOG00395	sp|O64210|CAPSD_BPMD2 Probable major capsid protein gp17; Xs	Xs
C2B_NODE_140_length_22790_cov_1.426643_7	7	3289	3873	-1
C2B_NODE_140_length_22790_cov_1.426643_8	8	3874	4983	-1	VOG00045	sp|Q6QGD5|PORTL_BPT5 Portal protein; XhXpXrXs	Xr;Xs;Xp;Xh
C2B_NODE_140_length_22790_cov_1.426643_9	9	4980	5141	-1
C2B_NODE_140_length_22790_cov_1.426643_10	10	5250	5525	-1
C2B_NODE_140_length_22790_cov_1.426643_11	11	5518	5733	-1
C2B_NODE_140_length_22790_cov_1.426643_12	12	5811	7628	-1	VOG06541	sp|Q05219|VG13_BPML5 Gene 13 protein; Xu	Xu
C2B_NODE_140_length_22790_cov_1.426643_13	13	7631	8113	-1	VOG00623	REFSEQ P27 family terminase small subunit; Xu	Xu
C2B_NODE_140_length_22790_cov_1.426643_14	14	8605	9126	-1
C2B_NODE_140_length_22790_cov_1.426643_15	15	9308	9451	-1
C2B_NODE_140_length_22790_cov_1.426643_16	16	9466	10275	-1
C2B_NODE_140_length_22790_cov_1.426643_17	17	10496	11242	-1
C2B_NODE_140_length_22790_cov_1.426643_18	18	11338	11658	-1
C2B_NODE_140_length_22790_cov_1.426643_19	19	11655	11840	-1
C2B_NODE_140_length_22790_cov_1.426643_20	20	11854	12186	-1
C2B_NODE_140_length_22790_cov_1.426643_21	21	12360	13982	-1	VOG19836	REFSEQ hypothetical protein; Xu	Xu
C2B_NODE_140_length_22790_cov_1.426643_22	22	16063	16194	-1
C2B_NODE_140_length_22790_cov_1.426643_23	23	16226	16570	-1
C2B_NODE_140_length_22790_cov_1.426643_24	24	16632	17099	-1
C2B_NODE_140_length_22790_cov_1.426643_25	25	17248	17565	-1
C2B_NODE_140_length_22790_cov_1.426643_26	26	17590	18144	-1
C2B_NODE_140_length_22790_cov_1.426643_27	27	19405	19581	-1
C2B_NODE_140_length_22790_cov_1.426643_28	28	19828	20934	-1
C2B_NODE_140_length_22790_cov_1.426643_29	29	20935	21249	-1
C2B_NODE_140_length_22790_cov_1.426643_30	30	21242	21466	-1
C2B_NODE_140_length_22790_cov_1.426643_31	31	21479	21727	-1
C2B_NODE_140_length_22790_cov_1.426643_32	32	21727	21888	-1
C2B_NODE_140_length_22790_cov_1.426643_33	33	21904	22788	-1
C2B_NODE_224_length_16440_cov_13.937351_1	1	3	3359	-1	VOG03675	REFSEQ tail protein; Xu	Xu
C2B_NODE_224_length_16440_cov_13.937351_2	2	3374	3514	-1
C2B_NODE_224_length_16440_cov_13.937351_3	3	3565	3933	-1	VOG01629	REFSEQ hypothetical protein; Xu	Xu
C2B_NODE_224_length_16440_cov_13.937351_4	4	4064	4675	-1	VOG01659	REFSEQ tail protein; Xu	Xu
C2B_NODE_224_length_16440_cov_13.937351_5	5	4703	5098	-1	VOG01028	REFSEQ DUF806 family protein; Xu	Xu
C2B_NODE_224_length_16440_cov_13.937351_6	6	5098	5574	-1
C2B_NODE_224_length_16440_cov_13.937351_7	7	5576	5911	-1	VOG00063	sp|O48446|HCP16_BPSPP Head completion protein gp16; XpXrXs	Xr;Xp;Xs
C2B_NODE_224_length_16440_cov_13.937351_8	8	5898	6206	-1
C2B_NODE_224_length_16440_cov_13.937351_9	9	6269	7564	-1	VOG00395	sp|O64210|CAPSD_BPMD2 Probable major capsid protein gp17; Xs	Xs
C2B_NODE_224_length_16440_cov_13.937351_10	10	7557	8141	-1
C2B_NODE_224_length_16440_cov_13.937351_11	11	8141	9211	-1	VOG00045	sp|Q6QGD5|PORTL_BPT5 Portal protein; XhXpXrXs	Xr;Xs;Xp;Xh
C2B_NODE_224_length_16440_cov_13.937351_12	12	9208	9372	-1
C2B_NODE_224_length_16440_cov_13.937351_13	13	9389	11215	-1	VOG06541	sp|Q05219|VG13_BPML5 Gene 13 protein; Xu	Xu
C2B_NODE_224_length_16440_cov_13.937351_14	14	11218	11682	-1	VOG00623	REFSEQ P27 family terminase small subunit; Xu	Xu
C2B_NODE_224_length_16440_cov_13.937351_15	15	12221	12427	-1	VOG13838	sp|Q9CHE9|YHJA_LACLA UPF0337 protein YhjA; Xu	Xu
C2B_NODE_224_length_16440_cov_13.937351_16	16	12507	13058	-1
C2B_NODE_224_length_16440_cov_13.937351_17	17	13000	13164	-1
C2B_NODE_224_length_16440_cov_13.937351_18	18	13166	13549	-1
C2B_NODE_224_length_16440_cov_13.937351_19	19	13611	13757	-1
C2B_NODE_224_length_16440_cov_13.937351_20	20	13750	14316	-1
C2B_NODE_224_length_16440_cov_13.937351_21	21	14868	15281	-1	VOG00667	sp|O34055|ARPU_BPO12 Putative autolysin regulatory protein ArpU; Xu	Xu
C2B_NODE_224_length_16440_cov_13.937351_22	22	15546	15740	-1
C2B_NODE_224_length_16440_cov_13.937351_23	23	15872	16006	-1
C2B_NODE_224_length_16440_cov_13.937351_24	24	16006	16173	-1
C2B_NODE_224_length_16440_cov_13.937351_25	25	16226	16438	-1
C2B_NODE_347_length_12620_cov_3.667414_full_1	1	3	140	1
C2B_NODE_347_length_12620_cov_3.667414_full_2	2	275	1249	1	VOG00012	sp|P22877|INTR_SACER Integrase; XhXr	Xr;Xh
C2B_NODE_347_length_12620_cov_3.667414_full_3	3	1643	3043	1
C2B_NODE_347_length_12620_cov_3.667414_full_4	4	3113	3268	-1
C2B_NODE_347_length_12620_cov_3.667414_full_5	5	4112	4375	1
C2B_NODE_347_length_12620_cov_3.667414_full_6	6	4439	4633	1
C2B_NODE_347_length_12620_cov_3.667414_full_7	7	4655	6538	1
C2B_NODE_347_length_12620_cov_3.667414_full_8	8	6538	7659	1	VOG27111	sp|D3KFX4|GP16_BPLP2 Baseplate protein gp16; XpXrXs	Xr;Xp;Xs
C2B_NODE_347_length_12620_cov_3.667414_full_9	9	7656	8054	1	VOG25596	REFSEQ hypothetical protein; Xu	Xu
C2B_NODE_347_length_12620_cov_3.667414_full_10	10	8057	8944	1	VOG18003	sp|O21886|RBP_BPLSK Receptor binding protein; XpXs	Xp;Xs
C2B_NODE_347_length_12620_cov_3.667414_full_11	11	8973	9293	1	VOG12151	REFSEQ holin; Xu	Xu
C2B_NODE_347_length_12620_cov_3.667414_full_12	12	9363	10340	1
C2B_NODE_347_length_12620_cov_3.667414_full_13	13	10434	10592	1
C2B_NODE_347_length_12620_cov_3.667414_full_14	14	10631	11194	1
C2B_NODE_347_length_12620_cov_3.667414_full_15	15	11142	11426	1
C2B_NODE_347_length_12620_cov_3.667414_full_16	16	11446	12042	1
C2B_NODE_36_length_47053_cov_4.738759_full_1_1	1	1	318	-1
C2B_NODE_36_length_47053_cov_4.738759_full_1_2	2	305	535	-1
C2B_NODE_36_length_47053_cov_4.738759_full_1_3	3	551	1702	-1
C2B_NODE_36_length_47053_cov_4.738759_full_1_4	4	1709	2101	-1
C2B_NODE_36_length_47053_cov_4.738759_full_1_5	5	2098	2946	-1
C2B_NODE_36_length_47053_cov_4.738759_full_1_6	6	2946	4022	-1	VOG01781	REFSEQ tail protein; Xu	Xu
C2B_NODE_36_length_47053_cov_4.738759_full_1_7	7	4023	4838	-1	VOG01467	REFSEQ tail family protein; Xu	Xu
C2B_NODE_36_length_47053_cov_4.738759_full_1_8	8	4857	8636	-1	VOG03675	REFSEQ tail protein; Xu	Xu
C2B_NODE_36_length_47053_cov_4.738759_full_1_9	9	8860	9216	-1	VOG01629	REFSEQ hypothetical protein; Xu	Xu
C2B_NODE_36_length_47053_cov_4.738759_full_1_10	10	9348	9956	-1	VOG01659	REFSEQ tail protein; Xu	Xu
C2B_NODE_36_length_47053_cov_4.738759_full_1_11	11	9985	10380	-1	VOG01028	REFSEQ DUF806 family protein; Xu	Xu
C2B_NODE_36_length_47053_cov_4.738759_full_1_12	12	10377	10856	-1
C2B_NODE_36_length_47053_cov_4.738759_full_1_13	13	10858	11193	-1	VOG00063	sp|O48446|HCP16_BPSPP Head completion protein gp16; XpXrXs	Xr;Xp;Xs
C2B_NODE_36_length_47053_cov_4.738759_full_1_14	14	11180	11485	-1
C2B_NODE_36_length_47053_cov_4.738759_full_1_15	15	11551	12846	-1	VOG00395	sp|O64210|CAPSD_BPMD2 Probable major capsid protein gp17; Xs	Xs
C2B_NODE_36_length_47053_cov_4.738759_full_1_16	16	12839	13423	-1
C2B_NODE_36_length_47053_cov_4.738759_full_1_17	17	13423	14493	-1	VOG00045	sp|Q6QGD5|PORTL_BPT5 Portal protein; XhXpXrXs	Xr;Xs;Xp;Xh
C2B_NODE_36_length_47053_cov_4.738759_full_1_18	18	14490	14654	-1
C2B_NODE_36_length_47053_cov_4.738759_full_1_19	19	14671	16497	-1	VOG06541	sp|Q05219|VG13_BPML5 Gene 13 protein; Xu	Xu
C2B_NODE_36_length_47053_cov_4.738759_full_1_20	20	16500	16964	-1	VOG00623	REFSEQ P27 family terminase small subunit; Xu	Xu
C2B_NODE_36_length_47053_cov_4.738759_full_1_21	21	17134	17637	-1
C2B_NODE_36_length_47053_cov_4.738759_full_1_22	22	17658	17918	-1
C2B_NODE_36_length_47053_cov_4.738759_full_1_23	23	18495	19379	-1
C2B_NODE_36_length_47053_cov_4.738759_full_1_24	24	19511	19924	-1	VOG00667	sp|O34055|ARPU_BPO12 Putative autolysin regulatory protein ArpU; Xu	Xu
C2B_NODE_36_length_47053_cov_4.738759_full_1_25	25	20236	20391	-1
C2B_NODE_36_length_47053_cov_4.738759_full_1_26	26	20391	20867	-1	VOG03776	REFSEQ class I SAM-dependent methyltransferase; Xu	Xu
C2B_NODE_36_length_47053_cov_4.738759_full_1_27	27	20867	21274	-1
C2B_NODE_36_length_47053_cov_4.738759_full_1_28	28	21340	22056	-1	VOG07949	REFSEQ hypothetical protein; Xu	Xu
C2B_NODE_36_length_47053_cov_4.738759_full_1_29	29	22072	22473	-1	VOG04337	REFSEQ replication terminator protein; Xu	Xu
C2B_NODE_36_length_47053_cov_4.738759_full_1_30	30	22479	23060	-1
C2B_NODE_36_length_47053_cov_4.738759_full_1_31	31	23153	25093	-1	VOG00186	sp|P32270|DDA_BPT4 ATP-dependent DNA helicase dda; XhXr	Xr;Xh
C2B_NODE_36_length_47053_cov_4.738759_full_1_32	32	25096	25953	-1
C2B_NODE_36_length_47053_cov_4.738759_full_1_33	33	26014	26460	-1
C2B_NODE_36_length_47053_cov_4.738759_full_1_34	34	26463	27245	-1	VOG00172	REFSEQ hypothetical protein; Xu	Xu
C2B_NODE_36_length_47053_cov_4.738759_full_1_35	35	27258	27932	-1	VOG01381	sp|O31907|YORG_BACSU SPbeta prophage-derived uncharacterized protein YorG; Xu	Xu
C2B_NODE_36_length_47053_cov_4.738759_full_1_36	36	27936	28847	-1	VOG02848	REFSEQ DUF1351 domain-containing protein; Xu	Xu
C2B_NODE_36_length_47053_cov_4.738759_full_1_37	37	28908	29252	-1
C2B_NODE_36_length_47053_cov_4.738759_full_1_38	38	29245	29439	-1
C2B_NODE_36_length_47053_cov_4.738759_full_1_39	39	29570	29728	-1
C2B_NODE_36_length_47053_cov_4.738759_full_1_40	40	29731	29904	-1
C2B_NODE_36_length_47053_cov_4.738759_full_1_41	41	29897	30190	-1
C2B_NODE_36_length_47053_cov_4.738759_full_1_42	42	30193	30915	-1	VOG01163	REFSEQ hypothetical protein; Xu	Xu
C2B_NODE_36_length_47053_cov_4.738759_full_1_43	43	30918	31133	-1
C2B_NODE_36_length_47053_cov_4.738759_full_1_44	44	31418	31768	1
C2B_NODE_36_length_47053_cov_4.738759_full_1_45	45	31769	32152	1
C2B_NODE_36_length_47053_cov_4.738759_full_1_46	46	32232	33278	1	VOG00389	REFSEQ PH domain-containing protein; Xu	Xu
C2B_NODE_36_length_47053_cov_4.738759_full_1_47	47	33286	33663	1	VOG02600	REFSEQ DUF2513 domain-containing protein; Xu	Xu
C2B_NODE_36_length_47053_cov_4.738759_full_1_48	48	33818	34885	1	VOG00012	sp|P22877|INTR_SACER Integrase; XhXr	Xr;Xh
C2B_NODE_36_length_47053_cov_4.738759_full_1_49	49	34944	35063	-1
C2B_NODE_421_length_11094_cov_1.337011_1	1	3	158	1
C2B_NODE_421_length_11094_cov_1.337011_2	2	229	513	1	VOG00344	REFSEQ hypothetical protein; Xu	Xu
C2B_NODE_421_length_11094_cov_1.337011_3	3	513	932	1
C2B_NODE_421_length_11094_cov_1.337011_4	4	933	1394	1
C2B_NODE_421_length_11094_cov_1.337011_5	5	1381	1920	1
C2B_NODE_421_length_11094_cov_1.337011_6	6	1920	2117	1
C2B_NODE_421_length_11094_cov_1.337011_7	7	2176	2436	1
C2B_NODE_421_length_11094_cov_1.337011_8	8	2429	2623	1
C2B_NODE_421_length_11094_cov_1.337011_9	9	2715	2921	-1
C2B_NODE_421_length_11094_cov_1.337011_10	10	2875	3693	-1	VOG27809	sp|Q7VIN2|NPD_HELHP NAD-dependent protein deacylase; Xh	Xh
C2B_NODE_421_length_11094_cov_1.337011_11	11	3686	3964	-1
C2B_NODE_421_length_11094_cov_1.337011_12	12	3952	4614	-1	VOG01750	REFSEQ hypothetical protein; Xu	Xu
C2B_NODE_421_length_11094_cov_1.337011_13	13	4669	5115	-1
C2B_NODE_421_length_11094_cov_1.337011_14	14	5127	5255	-1
C2B_NODE_421_length_11094_cov_1.337011_15	15	5245	5379	-1
C2B_NODE_421_length_11094_cov_1.337011_16	16	5379	5549	-1
C2B_NODE_421_length_11094_cov_1.337011_17	17	5552	5716	-1
C2B_NODE_421_length_11094_cov_1.337011_18	18	5716	6414	-1	VOG27135	REFSEQ hypothetical protein; Xu	Xu
C2B_NODE_421_length_11094_cov_1.337011_19	19	6411	6602	-1	VOG02534	REFSEQ hypothetical protein; Xu	Xu
C2B_NODE_421_length_11094_cov_1.337011_20	20	6590	6772	-1
C2B_NODE_421_length_11094_cov_1.337011_21	21	6774	7700	-1	VOG19143	REFSEQ hypothetical protein; Xu	Xu
C2B_NODE_421_length_11094_cov_1.337011_22	22	7743	8279	-1	VOG01112	REFSEQ hypothetical protein; Xu	Xu
C2B_NODE_421_length_11094_cov_1.337011_23	23	8288	8557	-1	VOG06436	REFSEQ hypothetical protein; Xu	Xu
C2B_NODE_421_length_11094_cov_1.337011_24	24	8557	8832	-1
C2B_NODE_421_length_11094_cov_1.337011_25	25	8829	9188	-1
C2B_NODE_421_length_11094_cov_1.337011_26	26	9199	9372	-1
C2B_NODE_421_length_11094_cov_1.337011_27	27	9362	9559	-1
C2B_NODE_421_length_11094_cov_1.337011_28	28	9570	9848	-1
C2B_NODE_421_length_11094_cov_1.337011_29	29	9848	10054	-1
C2B_NODE_421_length_11094_cov_1.337011_30	30	10054	10308	-1
C2B_NODE_421_length_11094_cov_1.337011_31	31	10305	10493	-1	VOG05819	REFSEQ hypothetical protein; Xu	Xu
C2B_NODE_421_length_11094_cov_1.337011_32	32	10490	10693	-1	VOG15380	REFSEQ hypothetical protein; Xu	Xu
C2B_NODE_421_length_11094_cov_1.337011_33	33	10690	10884	-1
C2B_NODE_421_length_11094_cov_1.337011_34	34	10948	11094	-1
C2B_NODE_425_length_11026_cov_0.905312_1	1	3	335	1	VOG03079	REFSEQ head-tail adaptor protein; Xu	Xu
C2B_NODE_425_length_11026_cov_0.905312_2	2	328	831	1	VOG02497	REFSEQ HK97 gp10 family protein; Xu	Xu
C2B_NODE_425_length_11026_cov_0.905312_3	3	828	1196	1	VOG01634	REFSEQ hypothetical protein; Xu	Xu
C2B_NODE_425_length_11026_cov_0.905312_4	4	1200	1802	1
C2B_NODE_425_length_11026_cov_0.905312_5	5	1880	2269	1	VOG02144	REFSEQ hypothetical protein; Xu	Xu
C2B_NODE_425_length_11026_cov_0.905312_6	6	2296	2583	1
C2B_NODE_425_length_11026_cov_0.905312_7	7	2583	5213	1	VOG00893	REFSEQ tail tape measure protein; Xu	Xu
C2B_NODE_425_length_11026_cov_0.905312_8	8	5222	6106	1
C2B_NODE_425_length_11026_cov_0.905312_9	9	6108	7199	1	VOG00813	REFSEQ minor tail protein; Xu	Xu
C2B_NODE_425_length_11026_cov_0.905312_10	10	7208	8197	1	VOG01265	REFSEQ H-type lectin domain-containing protein; Xu	Xu
C2B_NODE_425_length_11026_cov_0.905312_11	11	8213	8737	1
C2B_NODE_425_length_11026_cov_0.905312_12	12	9001	9315	1
C2B_NODE_425_length_11026_cov_0.905312_13	13	9485	9658	1
C2B_NODE_425_length_11026_cov_0.905312_14	14	9824	10378	1
C2B_NODE_425_length_11026_cov_0.905312_15	15	10381	10779	1	VOG18002	REFSEQ hypothetical protein; Xu	Xu
C2B_NODE_425_length_11026_cov_0.905312_16	16	10772	11026	1
C2B_NODE_451_length_10673_cov_2.675517_full_1	1	1	117	-1
C2B_NODE_451_length_10673_cov_2.675517_full_2	2	1408	1728	-1
C2B_NODE_451_length_10673_cov_2.675517_full_3	3	2363	2650	-1
C2B_NODE_451_length_10673_cov_2.675517_full_4	4	2908	3063	-1
C2B_NODE_451_length_10673_cov_2.675517_full_5	5	3378	4790	-1	VOG02581	REFSEQ DNA primase/helicase; Xu	Xu
C2B_NODE_451_length_10673_cov_2.675517_full_6	6	4801	5712	-1
C2B_NODE_451_length_10673_cov_2.675517_full_7	7	5776	6165	-1
C2B_NODE_451_length_10673_cov_2.675517_full_8	8	6185	6619	-1
C2B_NODE_451_length_10673_cov_2.675517_full_9	9	6612	6980	-1
C2B_NODE_451_length_10673_cov_2.675517_full_10	10	6993	7247	-1
C2B_NODE_451_length_10673_cov_2.675517_full_11	11	7539	8174	-1
C2B_NODE_451_length_10673_cov_2.675517_full_12	12	8223	8360	-1
C2B_NODE_451_length_10673_cov_2.675517_full_13	13	8360	9013	-1	VOG02089	REFSEQ Rha family transcriptional regulator; Xu	Xu
C2B_NODE_451_length_10673_cov_2.675517_full_14	14	9127	9327	-1
C2B_NODE_451_length_10673_cov_2.675517_full_15	15	9598	9948	1
C2B_NODE_451_length_10673_cov_2.675517_full_16	16	9949	10332	1
C2B_NODE_451_length_10673_cov_2.675517_full_17	17	10405	10671	1
C2B_NODE_502_length_10118_cov_2.648884_1	1	3	461	-1	VOG00805	sp|O21902|SSB_BPLSK SSB protein; Xh	Xh
C2B_NODE_502_length_10118_cov_2.648884_2	2	424	1134	-1	VOG02554	REFSEQ hypothetical protein; Xu	Xu
C2B_NODE_502_length_10118_cov_2.648884_3	3	1134	1769	-1	VOG10058	sp|P04892|ERF_BPP22 Essential recombination function protein; Xh	Xh
C2B_NODE_502_length_10118_cov_2.648884_4	4	1785	2204	-1	VOG16339	REFSEQ hypothetical protein; Xu	Xu
C2B_NODE_502_length_10118_cov_2.648884_5	5	2197	2385	-1
C2B_NODE_502_length_10118_cov_2.648884_6	6	2450	2659	-1
C2B_NODE_502_length_10118_cov_2.648884_7	7	2770	3003	-1
C2B_NODE_502_length_10118_cov_2.648884_8	8	3006	3287	-1
C2B_NODE_502_length_10118_cov_2.648884_9	9	3349	3918	1
C2B_NODE_502_length_10118_cov_2.648884_10	10	3788	4045	-1
C2B_NODE_502_length_10118_cov_2.648884_11	11	4141	4866	-1	VOG00275	sp|O34449|YOQD_BACSU SPbeta prophage-derived putative antirepressor protein YoqD; Xu	Xu
C2B_NODE_502_length_10118_cov_2.648884_12	12	4879	5211	-1
C2B_NODE_502_length_10118_cov_2.648884_13	13	5370	5732	1
C2B_NODE_502_length_10118_cov_2.648884_14	14	5767	6312	1
C2B_NODE_502_length_10118_cov_2.648884_15	15	6275	6691	1
C2B_NODE_502_length_10118_cov_2.648884_16	16	6935	7690	1
C2B_NODE_502_length_10118_cov_2.648884_17	17	7854	8927	1	VOG00012	sp|P22877|INTR_SACER Integrase; XhXr	Xr;Xh
C2B_NODE_502_length_10118_cov_2.648884_18	18	9040	10116	-1
C2B_NODE_89_length_29067_cov_1.172564_1	1	59	298	-1
C2B_NODE_89_length_29067_cov_1.172564_2	2	300	530	-1
C2B_NODE_89_length_29067_cov_1.172564_3	3	539	694	-1
C2B_NODE_89_length_29067_cov_1.172564_4	4	694	4377	-1	VOG00378	REFSEQ tail protein; Xu	Xu
C2B_NODE_89_length_29067_cov_1.172564_5	5	4374	5201	-1	VOG01467	REFSEQ tail family protein; Xu	Xu
C2B_NODE_89_length_29067_cov_1.172564_6	6	5201	8965	-1
C2B_NODE_89_length_29067_cov_1.172564_7	7	8934	9170	-1
C2B_NODE_89_length_29067_cov_1.172564_8	8	9263	9712	-1	VOG00358	REFSEQ hypothetical protein; Xu	Xu
C2B_NODE_89_length_29067_cov_1.172564_9	9	9752	10351	-1	VOG00970	sp|A9CRB8|TAIL_BPMR1 Putative tail protein; Xu	Xu
C2B_NODE_89_length_29067_cov_1.172564_10	10	10366	10731	-1
C2B_NODE_89_length_29067_cov_1.172564_11	11	10728	11075	-1	VOG02497	REFSEQ HK97 gp10 family protein; Xu	Xu
C2B_NODE_89_length_29067_cov_1.172564_12	12	11092	11385	-1	VOG01650	REFSEQ hypothetical protein; Xu	Xu
C2B_NODE_89_length_29067_cov_1.172564_13	13	11385	11732	-1	VOG00234	sp|Q38584|HCP15_BPSPP Head completion protein gp15; XpXrXs	Xr;Xp;Xs
C2B_NODE_89_length_29067_cov_1.172564_14	14	11919	12800	-1	VOG02639	sp|P19727|CAPSB_BPT7 Minor capsid protein; XrXs	Xr;Xs
C2B_NODE_89_length_29067_cov_1.172564_15	15	12819	13370	-1
C2B_NODE_89_length_29067_cov_1.172564_16	16	13521	13790	-1
C2B_NODE_89_length_29067_cov_1.172564_17	17	13804	14760	-1
C2B_NODE_89_length_29067_cov_1.172564_18	18	14922	16496	-1	VOG00031	sp|Q05220|PORTL_BPML5 Portal protein; XpXrXs	Xr;Xp;Xs
C2B_NODE_89_length_29067_cov_1.172564_19	19	16499	17782	-1	VOG06541	sp|Q05219|VG13_BPML5 Gene 13 protein; Xu	Xu
C2B_NODE_89_length_29067_cov_1.172564_20	20	17782	18345	-1	VOG00570	sp|P68928|TERS_BPSF6 Terminase small subunit; Xr	Xr
C2B_NODE_89_length_29067_cov_1.172564_21	21	18385	18534	-1
C2B_NODE_89_length_29067_cov_1.172564_22	22	18620	18940	-1
C2B_NODE_89_length_29067_cov_1.172564_23	23	19035	19208	-1
C2B_NODE_89_length_29067_cov_1.172564_24	24	19268	20497	-1	VOG00232	sp|O31948|YONJ_BACSU SPbeta prophage-derived uncharacterized protein YonJ; Xu	Xu
C2B_NODE_89_length_29067_cov_1.172564_25	25	20497	20784	-1
C2B_NODE_89_length_29067_cov_1.172564_26	26	21184	21576	-1	VOG00153	sp|Q03182|RINA_BPPHA Transcriptional activator rinA; Xu	Xu
C2B_NODE_89_length_29067_cov_1.172564_27	27	21592	22080	-1
C2B_NODE_89_length_29067_cov_1.172564_28	28	22077	22259	-1	VOG10760	REFSEQ hypothetical protein; Xu	Xu
C2B_NODE_89_length_29067_cov_1.172564_29	29	22286	22507	-1
C2B_NODE_89_length_29067_cov_1.172564_30	30	22607	22909	-1	VOG07811	REFSEQ hypothetical protein; Xu	Xu
C2B_NODE_89_length_29067_cov_1.172564_31	31	22906	23106	-1
C2B_NODE_89_length_29067_cov_1.172564_32	32	23109	23306	-1
C2B_NODE_89_length_29067_cov_1.172564_33	33	23309	23506	-1
C2B_NODE_89_length_29067_cov_1.172564_34	34	23503	24084	-1
C2B_NODE_89_length_29067_cov_1.172564_35	35	24077	24379	-1	VOG04969	REFSEQ hypothetical protein; Xu	Xu
C2B_NODE_89_length_29067_cov_1.172564_36	36	24379	24552	-1
C2B_NODE_89_length_29067_cov_1.172564_37	37	24552	24896	-1
C2B_NODE_89_length_29067_cov_1.172564_38	38	24916	25668	1	VOG13411	REFSEQ DUF4145 domain-containing protein; Xu	Xu
C2B_NODE_89_length_29067_cov_1.172564_39	39	25628	25813	-1
C2B_NODE_89_length_29067_cov_1.172564_40	40	25803	26219	-1	VOG00593	sp|Q9MCN8|RUSA_BPHK7 Crossover junction endodeoxyribonuclease rusA; Xr	Xr
C2B_NODE_89_length_29067_cov_1.172564_41	41	26216	26659	-1
C2B_NODE_89_length_29067_cov_1.172564_42	42	26741	27442	-1	VOG02554	REFSEQ hypothetical protein; Xu	Xu
C2B_NODE_89_length_29067_cov_1.172564_43	43	27450	28487	-1	VOG00187	sp|P34877|MTSA_LACLC Type II methyltransferase M1.ScrFI; XhXp	Xp;Xh
C2B_NODE_89_length_29067_cov_1.172564_44	44	28534	29067	-1	VOG00146	REFSEQ helix-turn-helix domain-containing protein; Xu	Xu
C2C_NODE_135_length_20576_cov_1.142843_1	1	45	443	1
C2C_NODE_135_length_20576_cov_1.142843_2	2	449	3361	1	VOG00921	REFSEQ hypothetical protein; Xu	Xu
C2C_NODE_135_length_20576_cov_1.142843_3	3	3503	4054	1
C2C_NODE_135_length_20576_cov_1.142843_4	4	4177	5580	1	VOG00395	sp|O64210|CAPSD_BPMD2 Probable major capsid protein gp17; Xs	Xs
C2C_NODE_135_length_20576_cov_1.142843_5	5	5630	5881	1
C2C_NODE_135_length_20576_cov_1.142843_6	6	6027	7103	1	VOG01060	REFSEQ hypothetical protein; Xu	Xu
C2C_NODE_135_length_20576_cov_1.142843_7	7	7169	8554	1	VOG00045	sp|Q6QGD5|PORTL_BPT5 Portal protein; XhXpXrXs	Xr;Xs;Xp;Xh
C2C_NODE_135_length_20576_cov_1.142843_8	8	8554	9498	1
C2C_NODE_135_length_20576_cov_1.142843_9	9	9498	9833	1
C2C_NODE_135_length_20576_cov_1.142843_10	10	9833	10171	1	VOG00063	sp|O48446|HCP16_BPSPP Head completion protein gp16; XpXrXs	Xr;Xp;Xs
C2C_NODE_135_length_20576_cov_1.142843_11	11	10168	10635	1
C2C_NODE_135_length_20576_cov_1.142843_12	12	10635	11012	1
C2C_NODE_135_length_20576_cov_1.142843_13	13	11067	11540	1	VOG00374	sp|P85503|STRU3_BPPAJ Structural protein 3; Xs	Xs
C2C_NODE_135_length_20576_cov_1.142843_14	14	11614	11940	1
C2C_NODE_135_length_20576_cov_1.142843_15	15	11958	12248	1
C2C_NODE_135_length_20576_cov_1.142843_16	16	12248	15286	1	VOG02044	REFSEQ tape measure protein; Xu	Xu
C2C_NODE_135_length_20576_cov_1.142843_17	17	15286	15618	1	VOG01598	sp|P03737|TIPM_LAMBD Tail tip protein M; XhXpXrXs	Xr;Xs;Xp;Xh
C2C_NODE_135_length_20576_cov_1.142843_18	18	15628	17202	1
C2C_NODE_135_length_20576_cov_1.142843_19	19	17204	17902	1	VOG00306	sp|O64332|TIPL_BPN15 Tail tip protein L; XhXpXrXs	Xr;Xs;Xp;Xh
C2C_NODE_135_length_20576_cov_1.142843_20	20	17904	18638	1
C2C_NODE_135_length_20576_cov_1.142843_21	21	18635	19261	1	VOG03070	sp|O64334|TIPI_BPN15 Tail tip assembly protein I; XhXs	Xs;Xh
C2C_NODE_135_length_20576_cov_1.142843_22	22	19266	20576	1
C2C_NODE_194_length_16880_cov_1.535367_1	1	2	367	-1
C2C_NODE_194_length_16880_cov_1.535367_2	2	364	2013	-1	VOG00635	REFSEQ tail family protein; Xu	Xu
C2C_NODE_194_length_16880_cov_1.535367_3	3	2010	7301	-1	VOG23678	REFSEQ tail tape measure protein; Xu	Xu
C2C_NODE_194_length_16880_cov_1.535367_4	4	7315	7503	-1
C2C_NODE_194_length_16880_cov_1.535367_5	5	7521	7880	-1	VOG01629	REFSEQ hypothetical protein; Xu	Xu
C2C_NODE_194_length_16880_cov_1.535367_6	6	7986	8609	-1	VOG01659	REFSEQ tail protein; Xu	Xu
C2C_NODE_194_length_16880_cov_1.535367_7	7	8640	9038	-1	VOG01028	REFSEQ DUF806 family protein; Xu	Xu
C2C_NODE_194_length_16880_cov_1.535367_8	8	9035	9541	-1
C2C_NODE_194_length_16880_cov_1.535367_9	9	9542	9889	-1	VOG00063	sp|O48446|HCP16_BPSPP Head completion protein gp16; XpXrXs	Xr;Xp;Xs
C2C_NODE_194_length_16880_cov_1.535367_10	10	9867	10184	-1	VOG00089	REFSEQ head-tail connector protein; Xu	Xu
C2C_NODE_194_length_16880_cov_1.535367_11	11	10206	11450	-1	VOG00395	sp|O64210|CAPSD_BPMD2 Probable major capsid protein gp17; Xs	Xs
C2C_NODE_194_length_16880_cov_1.535367_12	12	11463	12170	-1	VOG15472	REFSEQ ATP-dependent Clp protease proteolytic subunit; Xu	Xu
C2C_NODE_194_length_16880_cov_1.535367_13	13	12157	13326	-1	VOG00045	sp|Q6QGD5|PORTL_BPT5 Portal protein; XhXpXrXs	Xr;Xs;Xp;Xh
C2C_NODE_194_length_16880_cov_1.535367_14	14	13329	13538	-1	VOG22357	REFSEQ DUF1056 family protein; Xu	Xu
C2C_NODE_194_length_16880_cov_1.535367_15	15	13507	15477	-1	VOG04908	REFSEQ putative terminase small subunit; Xu	Xu
C2C_NODE_194_length_16880_cov_1.535367_16	16	15467	15940	-1	VOG00623	REFSEQ P27 family terminase small subunit; Xu	Xu
C2C_NODE_194_length_16880_cov_1.535367_17	17	16073	16579	-1	VOG00802	REFSEQ hypothetical protein; Xu	Xu
C2C_NODE_276_length_13888_cov_8.876535_1	1	84	674	1
C2C_NODE_276_length_13888_cov_8.876535_2	2	723	2468	1
C2C_NODE_276_length_13888_cov_8.876535_3	3	2791	3234	1
C2C_NODE_276_length_13888_cov_8.876535_4	4	3279	3842	-1	VOG21089	REFSEQ serine acetyltransferase; Xu	Xu
C2C_NODE_276_length_13888_cov_8.876535_5	5	3862	4635	-1	VOG00143	sp|P27830|RMLB2_ECOLI dTDP-glucose 4,6-dehydratase 2; Xh	Xh
C2C_NODE_276_length_13888_cov_8.876535_6	6	4819	5676	1	VOG00008	sp|Q6QGD3|ENDO1_BPT5 Putative endonuclease; Xh	Xh
C2C_NODE_276_length_13888_cov_8.876535_7	7	5730	6320	1
C2C_NODE_276_length_13888_cov_8.876535_8	8	6473	6886	1
C2C_NODE_276_length_13888_cov_8.876535_9	9	7298	8533	1
C2C_NODE_276_length_13888_cov_8.876535_10	10	9037	10191	1	VOG15495	REFSEQ putative replication protein; Xu	Xu
C2C_NODE_276_length_13888_cov_8.876535_11	11	10184	10774	1
C2C_NODE_276_length_13888_cov_8.876535_12	12	10823	12568	1
C2C_NODE_276_length_13888_cov_8.876535_13	13	12891	13334	1
C2C_NODE_276_length_13888_cov_8.876535_14	14	13379	13888	-1	VOG21089	REFSEQ serine acetyltransferase; Xu	Xu
C2C_NODE_410_length_11475_cov_17.766567_1	1	391	729	1
C2C_NODE_410_length_11475_cov_17.766567_2	2	798	905	1
C2C_NODE_410_length_11475_cov_17.766567_3	3	921	1238	1
C2C_NODE_410_length_11475_cov_17.766567_4	4	1739	2629	-1
C2C_NODE_410_length_11475_cov_17.766567_5	5	3182	3754	-1
C2C_NODE_410_length_11475_cov_17.766567_6	6	3987	4364	-1
C2C_NODE_410_length_11475_cov_17.766567_7	7	4369	4755	-1
C2C_NODE_410_length_11475_cov_17.766567_8	8	4869	5429	-1
C2C_NODE_410_length_11475_cov_17.766567_9	9	5484	6452	-1	VOG17018	REFSEQ Abi family protein; Xu	Xu
C2C_NODE_410_length_11475_cov_17.766567_10	10	6721	6960	-1
C2C_NODE_410_length_11475_cov_17.766567_11	11	7043	7543	-1
C2C_NODE_410_length_11475_cov_17.766567_12	12	7563	8135	-1
C2C_NODE_410_length_11475_cov_17.766567_13	13	8185	8775	-1
C2C_NODE_410_length_11475_cov_17.766567_14	14	8830	8982	-1
C2C_NODE_410_length_11475_cov_17.766567_15	15	8979	9293	-1
C2C_NODE_410_length_11475_cov_17.766567_16	16	9313	9681	-1
C2C_NODE_410_length_11475_cov_17.766567_17	17	9937	10203	1
C2C_NODE_410_length_11475_cov_17.766567_18	18	10200	10463	1
C2C_NODE_410_length_11475_cov_17.766567_19	19	10460	10573	1
C2C_NODE_410_length_11475_cov_17.766567_20	20	10570	10731	1
C2C_NODE_410_length_11475_cov_17.766567_21	21	10742	10960	1
C2C_NODE_410_length_11475_cov_17.766567_22	22	10976	11290	1
C2C_NODE_410_length_11475_cov_17.766567_23	23	11287	11475	1
C2C_NODE_438_length_11187_cov_7.431917_1	1	372	746	-1
C2C_NODE_438_length_11187_cov_7.431917_2	2	1711	2217	-1
C2C_NODE_438_length_11187_cov_7.431917_3	3	2172	2339	-1
C2C_NODE_438_length_11187_cov_7.431917_4	4	2681	3223	-1
C2C_NODE_438_length_11187_cov_7.431917_5	5	3296	4153	-1
C2C_NODE_438_length_11187_cov_7.431917_6	6	4155	4640	-1	VOG00271	REFSEQ holin; Xu	Xu
C2C_NODE_438_length_11187_cov_7.431917_7	7	4642	5055	-1	VOG24285	sp|Q92FD1|Y175_LISIN Uncharacterized protein Lin0175; Xh	Xh
C2C_NODE_438_length_11187_cov_7.431917_8	8	5068	5304	-1	VOG06453	REFSEQ hypothetical protein; Xu	Xu
C2C_NODE_438_length_11187_cov_7.431917_9	9	5320	8628	-1	VOG22638	REFSEQ baseplate protein tal-like protein; Xu	Xu
C2C_NODE_438_length_11187_cov_7.431917_10	10	8628	10268	-1	VOG00635	REFSEQ tail family protein; Xu	Xu
C2C_NODE_438_length_11187_cov_7.431917_11	11	10265	11185	-1
C2C_NODE_82_length_30459_cov_1.717097_1	1	414	1112	-1	VOG25223	REFSEQ N-acetylmuramoyl-L-alanine amidase; Xu	Xu
C2C_NODE_82_length_30459_cov_1.717097_2	2	1309	1779	-1	VOG00271	REFSEQ holin; Xu	Xu
C2C_NODE_82_length_30459_cov_1.717097_3	3	1789	2859	-1
C2C_NODE_82_length_30459_cov_1.717097_4	4	2900	3283	-1	VOG18002	REFSEQ hypothetical protein; Xu	Xu
C2C_NODE_82_length_30459_cov_1.717097_5	5	3297	3731	-1
C2C_NODE_82_length_30459_cov_1.717097_6	6	3743	4531	-1	VOG02291	REFSEQ receptor-binding protein; Xu	Xu
C2C_NODE_82_length_30459_cov_1.717097_7	7	4541	5632	-1	VOG02281	REFSEQ hypothetical protein; Xu	Xu
C2C_NODE_82_length_30459_cov_1.717097_8	8	5629	7104	-1	VOG10676	REFSEQ gp15; Xu	Xu
C2C_NODE_82_length_30459_cov_1.717097_9	9	7166	11995	-1	VOG03675	REFSEQ tail protein; Xu	Xu
C2C_NODE_82_length_30459_cov_1.717097_10	10	11999	12184	-1
C2C_NODE_82_length_30459_cov_1.717097_11	11	12184	12630	-1
C2C_NODE_82_length_30459_cov_1.717097_12	12	12734	13351	-1	VOG01659	REFSEQ tail protein; Xu	Xu
C2C_NODE_82_length_30459_cov_1.717097_13	13	13355	13732	-1	VOG01028	REFSEQ DUF806 family protein; Xu	Xu
C2C_NODE_82_length_30459_cov_1.717097_14	14	13732	14241	-1
C2C_NODE_82_length_30459_cov_1.717097_15	15	14234	14626	-1	VOG00063	sp|O48446|HCP16_BPSPP Head completion protein gp16; XpXrXs	Xr;Xp;Xs
C2C_NODE_82_length_30459_cov_1.717097_16	16	14593	14997	-1	VOG00089	REFSEQ head-tail connector protein; Xu	Xu
C2C_NODE_82_length_30459_cov_1.717097_17	17	15207	16466	-1	VOG00395	sp|O64210|CAPSD_BPMD2 Probable major capsid protein gp17; Xs	Xs
C2C_NODE_82_length_30459_cov_1.717097_18	18	16438	17175	-1	VOG15472	REFSEQ ATP-dependent Clp protease proteolytic subunit; Xu	Xu
C2C_NODE_82_length_30459_cov_1.717097_19	19	17175	18323	-1	VOG00045	sp|Q6QGD5|PORTL_BPT5 Portal protein; XhXpXrXs	Xr;Xs;Xp;Xh
C2C_NODE_82_length_30459_cov_1.717097_20	20	18513	20435	-1	VOG04908	REFSEQ putative terminase small subunit; Xu	Xu
C2C_NODE_82_length_30459_cov_1.717097_21	21	20437	20898	-1	VOG00623	REFSEQ P27 family terminase small subunit; Xu	Xu
C2C_NODE_82_length_30459_cov_1.717097_22	22	21151	21675	-1	VOG00802	REFSEQ hypothetical protein; Xu	Xu
C2C_NODE_82_length_30459_cov_1.717097_23	23	21726	21989	-1
C2C_NODE_82_length_30459_cov_1.717097_24	24	22128	22661	-1
C2C_NODE_82_length_30459_cov_1.717097_25	25	23247	24476	-1	VOG00232	sp|O31948|YONJ_BACSU SPbeta prophage-derived uncharacterized protein YonJ; Xu	Xu
C2C_NODE_82_length_30459_cov_1.717097_26	26	24476	24763	-1
C2C_NODE_82_length_30459_cov_1.717097_27	27	25163	25555	-1	VOG00153	sp|Q03182|RINA_BPPHA Transcriptional activator rinA; Xu	Xu
C2C_NODE_82_length_30459_cov_1.717097_28	28	25571	26059	-1
C2C_NODE_82_length_30459_cov_1.717097_29	29	26056	26238	-1	VOG10760	REFSEQ hypothetical protein; Xu	Xu
C2C_NODE_82_length_30459_cov_1.717097_30	30	26265	26486	-1
C2C_NODE_82_length_30459_cov_1.717097_31	31	26586	26888	-1	VOG07811	REFSEQ hypothetical protein; Xu	Xu
C2C_NODE_82_length_30459_cov_1.717097_32	32	26885	27085	-1
C2C_NODE_82_length_30459_cov_1.717097_33	33	27088	27285	-1
C2C_NODE_82_length_30459_cov_1.717097_34	34	27288	27485	-1
C2C_NODE_82_length_30459_cov_1.717097_35	35	27482	28063	-1
C2C_NODE_82_length_30459_cov_1.717097_36	36	28056	28358	-1	VOG04969	REFSEQ hypothetical protein; Xu	Xu
C2C_NODE_82_length_30459_cov_1.717097_37	37	28358	28531	-1
C2C_NODE_82_length_30459_cov_1.717097_38	38	28531	28875	-1
C2C_NODE_82_length_30459_cov_1.717097_39	39	28985	29647	1	VOG13411	REFSEQ DUF4145 domain-containing protein; Xu	Xu
C2C_NODE_82_length_30459_cov_1.717097_40	40	29607	29792	-1
C2C_NODE_82_length_30459_cov_1.717097_41	41	29782	30198	-1	VOG00593	sp|Q9MCN8|RUSA_BPHK7 Crossover junction endodeoxyribonuclease rusA; Xr	Xr
C2C_NODE_82_length_30459_cov_1.717097_42	42	30195	30458	-1
C40A_NODE_15_length_149055_cov_20.127041_full_1_1	1	827	1651	-1
C40A_NODE_15_length_149055_cov_20.127041_full_1_2	2	1651	2169	-1
C40A_NODE_15_length_149055_cov_20.127041_full_1_3	3	2169	2384	-1
C40A_NODE_15_length_149055_cov_20.127041_full_1_4	4	2398	2715	-1	VOG15562	REFSEQ hypothetical protein; Xu	Xu
C40A_NODE_15_length_149055_cov_20.127041_full_1_5	5	3154	3666	-1
C40A_NODE_15_length_149055_cov_20.127041_full_1_6	6	3666	4475	-1
C40A_NODE_15_length_149055_cov_20.127041_full_1_7	7	4476	5078	-1
C40A_NODE_15_length_149055_cov_20.127041_full_1_8	8	5091	6329	-1	VOG02429	sp|P51767|BPJ_BPP2 Baseplate protein J; XhXs	Xs;Xh
C40A_NODE_15_length_149055_cov_20.127041_full_1_9	9	6310	6711	-1
C40A_NODE_15_length_149055_cov_20.127041_full_1_10	10	6708	7142	-1	VOG00425	sp|P31340|SPIKE_BPP2 Spike protein; XhXpXs	Xs;Xp;Xh
C40A_NODE_15_length_149055_cov_20.127041_full_1_11	11	7135	8067	-1	VOG00860	REFSEQ hypothetical protein; Xu	Xu
C40A_NODE_15_length_149055_cov_20.127041_full_1_12	12	8067	8402	-1	VOG00120	REFSEQ hypothetical protein; Xu	Xu
C40A_NODE_15_length_149055_cov_20.127041_full_1_13	13	8402	9607	-1
C40A_NODE_15_length_149055_cov_20.127041_full_1_14	14	9604	14151	-1	VOG00049	REFSEQ hypothetical protein; Xu	Xu
C40A_NODE_15_length_149055_cov_20.127041_full_1_15	15	14240	14452	1
C40A_NODE_15_length_149055_cov_20.127041_full_1_16	16	14475	14663	-1
C40A_NODE_15_length_149055_cov_20.127041_full_1_17	17	14979	15140	-1
C40A_NODE_15_length_149055_cov_20.127041_full_1_18	18	15141	15425	-1
C40A_NODE_15_length_149055_cov_20.127041_full_1_19	19	15400	16026	-1
C40A_NODE_15_length_149055_cov_20.127041_full_1_20	20	16086	16583	-1
C40A_NODE_15_length_149055_cov_20.127041_full_1_21	21	16601	17695	-1	VOG01694	REFSEQ hypothetical protein; Xu	Xu
C40A_NODE_15_length_149055_cov_20.127041_full_1_22	22	17695	18183	-1	VOG10753	REFSEQ gp13; Xu	Xu
C40A_NODE_15_length_149055_cov_20.127041_full_1_23	23	18176	18514	-1
C40A_NODE_15_length_149055_cov_20.127041_full_1_24	24	18550	18927	-1
C40A_NODE_15_length_149055_cov_20.127041_full_1_25	25	18932	19561	-1	VOG01679	REFSEQ hypothetical protein; Xu	Xu
C40A_NODE_15_length_149055_cov_20.127041_full_1_26	26	19558	19899	-1
C40A_NODE_15_length_149055_cov_20.127041_full_1_27	27	19913	20977	-1	VOG24106	sp|A0A0H5AXT3|CAPSD_BPK21 Major capsid protein; Xs	Xs
C40A_NODE_15_length_149055_cov_20.127041_full_1_28	28	20990	21649	-1	VOG01051	REFSEQ DUF4355 domain-containing protein; Xu	Xu
C40A_NODE_15_length_149055_cov_20.127041_full_1_29	29	21859	21990	1
C40A_NODE_15_length_149055_cov_20.127041_full_1_30	30	21997	22245	1
C40A_NODE_15_length_149055_cov_20.127041_full_1_31	31	22362	23120	-1	VOG25369	REFSEQ head morphogenesis protein; Xu	Xu
C40A_NODE_15_length_149055_cov_20.127041_full_1_32	32	23215	24993	-1	VOG00031	sp|Q05220|PORTL_BPML5 Portal protein; XpXrXs	Xr;Xp;Xs
C40A_NODE_15_length_149055_cov_20.127041_full_1_33	33	24977	25303	-1
C40A_NODE_15_length_149055_cov_20.127041_full_1_34	34	25315	26634	-1	VOG25626	REFSEQ PBSX family terminase large subunit; Xu	Xu
C40A_NODE_15_length_149055_cov_20.127041_full_1_35	35	26640	27188	-1	VOG00570	sp|P68928|TERS_BPSF6 Terminase small subunit; Xr	Xr
C40A_NODE_15_length_149055_cov_20.127041_full_1_36	36	27471	27683	1	VOG13838	sp|Q9CHE9|YHJA_LACLA UPF0337 protein YhjA; Xu	Xu
C40A_NODE_15_length_149055_cov_20.127041_full_1_37	37	27707	27871	-1
C40A_NODE_15_length_149055_cov_20.127041_full_1_38	38	28306	28785	-1	VOG00667	sp|O34055|ARPU_BPO12 Putative autolysin regulatory protein ArpU; Xu	Xu
C40A_NODE_15_length_149055_cov_20.127041_full_1_39	39	28878	29087	-1
C40A_NODE_15_length_149055_cov_20.127041_full_1_40	40	29089	29367	-1
C40A_NODE_15_length_149055_cov_20.127041_full_1_41	41	29369	29599	-1
C40A_NODE_15_length_149055_cov_20.127041_full_1_42	42	29605	29814	-1
C40A_NODE_15_length_149055_cov_20.127041_full_1_43	43	29819	29992	-1
C40A_NODE_15_length_149055_cov_20.127041_full_1_44	44	29989	30204	-1
C40A_NODE_15_length_149055_cov_20.127041_full_1_45	45	30201	30512	-1
C40A_NODE_15_length_149055_cov_20.127041_full_1_46	46	30502	30861	-1	VOG00181	sp|O34401|YOPX_BACSU SPbeta prophage-derived uncharacterized protein YopX; Xu	Xu
C40A_NODE_15_length_149055_cov_20.127041_full_1_47	47	30845	31039	-1
C40A_NODE_15_length_149055_cov_20.127041_full_1_48	48	31052	31240	-1
C40A_NODE_15_length_149055_cov_20.127041_full_1_49	49	31241	31696	-1	VOG00251	REFSEQ hypothetical protein; Xu	Xu
C40A_NODE_15_length_149055_cov_20.127041_full_1_50	50	31959	32606	-1	VOG02554	REFSEQ hypothetical protein; Xu	Xu
C40A_NODE_15_length_149055_cov_20.127041_full_1_51	51	32620	33042	-1	VOG00805	sp|O21902|SSB_BPLSK SSB protein; Xh	Xh
C40A_NODE_15_length_149055_cov_20.127041_full_1_52	52	33039	33425	-1
C40A_NODE_15_length_149055_cov_20.127041_full_1_53	53	33409	34686	-1	VOG00081	sp|P04530|HELIC_BPT4 DnaB-like replicative helicase; XhXr	Xr;Xh
C40A_NODE_15_length_149055_cov_20.127041_full_1_54	54	34673	35605	-1	VOG02738	REFSEQ helix-turn-helix DNA-binding domain protein; Xu	Xu
C40A_NODE_15_length_149055_cov_20.127041_full_1_55	55	35636	36352	-1	VOG10058	sp|P04892|ERF_BPP22 Essential recombination function protein; Xh	Xh
C40A_NODE_15_length_149055_cov_20.127041_full_1_56	56	36339	36854	-1	VOG01528	sp|P06023|GAM_BPMU Putative DNA ends protecting protein gam; XhXp	Xp;Xh
C40A_NODE_15_length_149055_cov_20.127041_full_1_57	57	36857	37042	-1
C40A_NODE_15_length_149055_cov_20.127041_full_1_58	58	37039	37182	-1
C40A_NODE_15_length_149055_cov_20.127041_full_1_59	59	37175	37330	-1
C40A_NODE_15_length_149055_cov_20.127041_full_1_60	60	37336	37539	-1
C40A_NODE_15_length_149055_cov_20.127041_full_1_61	61	37542	37862	-1
C40A_NODE_15_length_149055_cov_20.127041_full_1_62	62	37866	38387	-1
C40A_NODE_15_length_149055_cov_20.127041_full_1_63	63	38461	38622	-1
C40A_NODE_15_length_149055_cov_20.127041_full_1_64	64	38713	38895	1
C40A_NODE_15_length_149055_cov_20.127041_full_1_65	65	38892	39080	-1
C40A_NODE_15_length_149055_cov_20.127041_full_1_66	66	39159	39383	1
C40A_NODE_15_length_149055_cov_20.127041_full_1_67	67	39345	39614	-1
C40A_NODE_15_length_149055_cov_20.127041_full_1_68	68	39650	40393	-1	VOG00275	sp|O34449|YOQD_BACSU SPbeta prophage-derived putative antirepressor protein YoqD; Xu	Xu
C40A_NODE_15_length_149055_cov_20.127041_full_1_69	69	40390	40680	-1
C40A_NODE_15_length_149055_cov_20.127041_full_1_70	70	40809	41528	1	VOG01324	sp|P03034|RPC1_LAMBD Repressor protein cI; Xp	Xp
C40A_NODE_15_length_149055_cov_20.127041_full_1_71	71	41548	41868	1
C40A_NODE_15_length_149055_cov_20.127041_full_1_72	72	42000	42776	1
C40A_NODE_15_length_149055_cov_20.127041_full_1_73	73	42807	43142	1
C40A_NODE_15_length_149055_cov_20.127041_full_1_74	74	43218	43718	1
C40A_NODE_15_length_149055_cov_20.127041_full_1_75	75	43681	44091	1
C40A_NODE_15_length_149055_cov_20.127041_full_1_76	76	44081	44293	-1
C40A_NODE_176_length_19785_cov_1.611049_1	1	1	192	1
C40A_NODE_176_length_19785_cov_1.611049_2	2	192	1373	1	VOG00045	sp|Q6QGD5|PORTL_BPT5 Portal protein; XhXpXrXs	Xr;Xs;Xp;Xh
C40A_NODE_176_length_19785_cov_1.611049_3	3	1378	2085	1	VOG15472	REFSEQ ATP-dependent Clp protease proteolytic subunit; Xu	Xu
C40A_NODE_176_length_19785_cov_1.611049_4	4	2086	3414	1	VOG00395	sp|O64210|CAPSD_BPMD2 Probable major capsid protein gp17; Xs	Xs
C40A_NODE_176_length_19785_cov_1.611049_5	5	3417	3782	1
C40A_NODE_176_length_19785_cov_1.611049_6	6	3739	4092	1
C40A_NODE_176_length_19785_cov_1.611049_7	7	4082	4549	1
C40A_NODE_176_length_19785_cov_1.611049_8	8	4546	4908	1	VOG01028	REFSEQ DUF806 family protein; Xu	Xu
C40A_NODE_176_length_19785_cov_1.611049_9	9	4908	5642	1	VOG01659	REFSEQ tail protein; Xu	Xu
C40A_NODE_176_length_19785_cov_1.611049_10	10	5700	6116	1
C40A_NODE_176_length_19785_cov_1.611049_11	11	6145	6327	1
C40A_NODE_176_length_19785_cov_1.611049_12	12	6332	13822	1	VOG03675	REFSEQ tail protein; Xu	Xu
C40A_NODE_176_length_19785_cov_1.611049_13	13	13809	14582	1	VOG00248	sp|O31977|YOMH_BACSU SPbeta prophage-derived uncharacterized protein YomH; Xu	Xu
C40A_NODE_176_length_19785_cov_1.611049_14	14	14582	17902	1	VOG09289	REFSEQ hypothetical protein; Xu	Xu
C40A_NODE_176_length_19785_cov_1.611049_15	15	17916	18125	1
C40A_NODE_176_length_19785_cov_1.611049_16	16	18085	19785	1	VOG02999	REFSEQ BppU family baseplate upper protein; Xu	Xu
C40A_NODE_193_length_18366_cov_2.134328_1	1	3	299	1
C40A_NODE_193_length_18366_cov_2.134328_2	2	299	565	1
C40A_NODE_193_length_18366_cov_2.134328_3	3	589	1134	1	VOG00014	sp|P13004|YLYS_BPPHV Uncharacterized protein near lysin gene (Fragment); Xu	Xu
C40A_NODE_193_length_18366_cov_2.134328_4	4	1124	1312	1
C40A_NODE_193_length_18366_cov_2.134328_5	5	1409	1873	1	VOG13506	REFSEQ hypothetical protein; Xu	Xu
C40A_NODE_193_length_18366_cov_2.134328_6	6	1864	2112	1	VOG02149	REFSEQ hypothetical protein; Xu	Xu
C40A_NODE_193_length_18366_cov_2.134328_7	7	2113	3087	1	VOG00541	sp|P00581|DPOL_BPT7 DNA-directed DNA polymerase; XhXr	Xr;Xh
C40A_NODE_193_length_18366_cov_2.134328_8	8	3124	3330	1	VOG13723	REFSEQ hypothetical protein; Xu	Xu
C40A_NODE_193_length_18366_cov_2.134328_9	9	3340	3513	1
C40A_NODE_193_length_18366_cov_2.134328_10	10	3506	3892	1	VOG03793	REFSEQ hypothetical protein; Xu	Xu
C40A_NODE_193_length_18366_cov_2.134328_11	11	3882	4451	1	VOG00225	sp|P32275|Y12F_BPT4 Uncharacterized 32.4 kDa protein in Gp30-rIII intergenic region; Xu	Xu
C40A_NODE_193_length_18366_cov_2.134328_12	12	4464	4727	1
C40A_NODE_193_length_18366_cov_2.134328_13	13	4899	5072	1
C40A_NODE_193_length_18366_cov_2.134328_14	14	5072	6115	1	VOG01523	sp|A6LP90|THYX_THEM4 Flavin-dependent thymidylate synthase; XhXr	Xr;Xh
C40A_NODE_193_length_18366_cov_2.134328_15	15	6192	6788	1
C40A_NODE_193_length_18366_cov_2.134328_16	16	6803	7051	1
C40A_NODE_193_length_18366_cov_2.134328_17	17	7074	7298	1
C40A_NODE_193_length_18366_cov_2.134328_18	18	7301	7705	1	VOG00931	sp|Q65JA6|NRDI_BACLD Protein NrdI; Xu	Xu
C40A_NODE_193_length_18366_cov_2.134328_19	19	7650	9824	1	VOG00109	sp|P00452|RIR1_ECOLI Ribonucleoside-diphosphate reductase 1 subunit alpha; XhXr	Xr;Xh
C40A_NODE_193_length_18366_cov_2.134328_20	20	9878	10852	1	VOG01413	sp|P69924|RIR2_ECOLI Ribonucleoside-diphosphate reductase 1 subunit beta; XhXr	Xr;Xh
C40A_NODE_193_length_18366_cov_2.134328_21	21	10893	11048	1
C40A_NODE_193_length_18366_cov_2.134328_22	22	11051	11458	1
C40A_NODE_193_length_18366_cov_2.134328_23	23	11467	11637	1
C40A_NODE_193_length_18366_cov_2.134328_24	24	11639	12220	1	VOG00817	sp|P13559|ENLYS_BPPRD Endolysin; XhXpXs	Xs;Xp;Xh
C40A_NODE_193_length_18366_cov_2.134328_25	25	12306	13064	1	VOG02562	sp|O07635|YLAK_BACSU Uncharacterized protein YlaK; Xh	Xh
C40A_NODE_193_length_18366_cov_2.134328_26	26	13103	13594	1	VOG23358	REFSEQ hypothetical protein; Xu	Xu
C40A_NODE_193_length_18366_cov_2.134328_27	27	13597	14454	1	VOG00086	REFSEQ hypothetical protein; Xu	Xu
C40A_NODE_193_length_18366_cov_2.134328_28	28	14444	14626	1
C40A_NODE_193_length_18366_cov_2.134328_29	29	14638	15399	1	VOG01350	sp|Q8ZNY9|PRP1_SALTY Serine/threonine-protein phosphatase 1; Xh	Xh
C40A_NODE_193_length_18366_cov_2.134328_30	30	15437	15808	1
C40A_NODE_193_length_18366_cov_2.134328_31	31	15821	16462	1
C40A_NODE_193_length_18366_cov_2.134328_32	32	16455	16952	1	VOG02330	REFSEQ hypothetical protein; Xu	Xu
C40A_NODE_193_length_18366_cov_2.134328_33	33	17004	17201	1
C40A_NODE_193_length_18366_cov_2.134328_34	34	17298	17966	1
C40A_NODE_193_length_18366_cov_2.134328_35	35	18011	18256	1
C40A_NODE_193_length_18366_cov_2.134328_36	36	18277	18366	1
C40A_NODE_234_length_16128_cov_1.596400_1	1	178	816	-1
C40A_NODE_234_length_16128_cov_1.596400_2	2	828	1277	-1
C40A_NODE_234_length_16128_cov_1.596400_3	3	1288	1935	-1	VOG01401	sp|Q38156|DAM_BPT1 DNA N-6-adenine-methyltransferase; XhXp	Xp;Xh
C40A_NODE_234_length_16128_cov_1.596400_4	4	1937	2269	-1
C40A_NODE_234_length_16128_cov_1.596400_5	5	2546	2923	1
C40A_NODE_234_length_16128_cov_1.596400_6	6	2877	3152	1
C40A_NODE_234_length_16128_cov_1.596400_7	7	3526	6366	-1	VOG00907	REFSEQ bifunctional DNA primase/polymerase; Xu	Xu
C40A_NODE_234_length_16128_cov_1.596400_8	8	6363	6566	-1
C40A_NODE_234_length_16128_cov_1.596400_9	9	6661	6909	-1	VOG00319	sp|P03040|RCRO_LAMBD Regulatory protein cro; XhXp	Xp;Xh
C40A_NODE_234_length_16128_cov_1.596400_10	10	7126	7800	1
C40A_NODE_234_length_16128_cov_1.596400_11	11	7860	9185	1	VOG02318	sp|O64262|VG69_BPMD2 Gene 69 protein; Xu	Xu
C40A_NODE_234_length_16128_cov_1.596400_12	12	9253	9852	1	VOG02472	sp|Q9T1P8|VP50_BPAPS Putative protein p50; Xu	Xu
C40A_NODE_234_length_16128_cov_1.596400_13	13	9914	12157	1	VOG00011	sp|O64235|DPOL_BPMD2 DNA polymerase; XhXr	Xr;Xh
C40A_NODE_234_length_16128_cov_1.596400_14	14	12159	12443	1
C40A_NODE_234_length_16128_cov_1.596400_15	15	12440	13903	1	VOG00140	sp|P04308|ETF1_VACCW Early transcription factor 70 kDa subunit; XhXs	Xs;Xh
C40A_NODE_234_length_16128_cov_1.596400_16	16	14007	14675	1
C40A_NODE_234_length_16128_cov_1.596400_17	17	14677	14892	1	VOG00852	REFSEQ pyocin activator PrtN family protein; Xu	Xu
C40A_NODE_234_length_16128_cov_1.596400_18	18	15025	15540	1
C40A_NODE_280_length_14573_cov_1.378236_1	1	3	92	-1
C40A_NODE_280_length_14573_cov_1.378236_2	2	44	256	-1
C40A_NODE_280_length_14573_cov_1.378236_3	3	234	581	-1
C40A_NODE_280_length_14573_cov_1.378236_4	4	553	738	-1
C40A_NODE_280_length_14573_cov_1.378236_5	5	740	898	-1
C40A_NODE_280_length_14573_cov_1.378236_6	6	895	1182	-1	VOG01361	sp|Q38665|NINX_BPP22 Putative protein ninX; Xu	Xu
C40A_NODE_280_length_14573_cov_1.378236_7	7	1179	1394	-1
C40A_NODE_280_length_14573_cov_1.378236_8	8	1455	1694	-1
C40A_NODE_280_length_14573_cov_1.378236_9	9	1789	1992	1	VOG24719	REFSEQ hypothetical protein; Xu	Xu
C40A_NODE_280_length_14573_cov_1.378236_10	10	1989	2273	1	VOG02440	REFSEQ hypothetical protein; Xu	Xu
C40A_NODE_280_length_14573_cov_1.378236_11	11	2273	2554	1	VOG26468	REFSEQ hypothetical protein; Xu	Xu
C40A_NODE_280_length_14573_cov_1.378236_12	12	2649	2798	1
C40A_NODE_280_length_14573_cov_1.378236_13	13	2957	3298	-1	VOG01674	REFSEQ hypothetical protein; Xu	Xu
C40A_NODE_280_length_14573_cov_1.378236_14	14	3282	3542	-1
C40A_NODE_280_length_14573_cov_1.378236_15	15	3715	4152	-1	VOG01255	sp|O80288|ENLYS_BPPS3 SAR-endolysin; XhXp	Xp;Xh
C40A_NODE_280_length_14573_cov_1.378236_16	16	4703	4936	1	VOG00121	REFSEQ hypothetical protein; Xu	Xu
C40A_NODE_280_length_14573_cov_1.378236_17	17	4952	5332	1
C40A_NODE_280_length_14573_cov_1.378236_18	18	5299	5568	1
C40A_NODE_280_length_14573_cov_1.378236_19	19	5608	6537	-1	VOG00381	REFSEQ hypothetical protein; Xu	Xu
C40A_NODE_280_length_14573_cov_1.378236_20	20	6524	7975	-1	VOG01334	sp|P44183|Y1409_HAEIN Uncharacterized protein HI_1409; Xu	Xu
C40A_NODE_280_length_14573_cov_1.378236_21	21	8015	8212	-1
C40A_NODE_280_length_14573_cov_1.378236_22	22	8212	8451	-1
C40A_NODE_280_length_14573_cov_1.378236_23	23	8464	8868	-1	VOG02400	REFSEQ hypothetical protein; Xu	Xu
C40A_NODE_280_length_14573_cov_1.378236_24	24	8868	9053	-1
C40A_NODE_280_length_14573_cov_1.378236_25	25	9174	9398	-1
C40A_NODE_280_length_14573_cov_1.378236_26	26	9398	9610	-1	VOG10975	REFSEQ hypothetical protein; Xu	Xu
C40A_NODE_280_length_14573_cov_1.378236_27	27	9735	10193	1	VOG00026	sp|Q6QGG9|D5_BPT5 Putative transcription factor D5; Xu	Xu
C40A_NODE_280_length_14573_cov_1.378236_28	28	10190	11623	-1	VOG06541	sp|Q05219|VG13_BPML5 Gene 13 protein; Xu	Xu
C40A_NODE_280_length_14573_cov_1.378236_29	29	11613	12050	-1	VOG23750	REFSEQ hypothetical protein; Xu	Xu
C40A_NODE_280_length_14573_cov_1.378236_30	30	12276	12518	-1
C40A_NODE_280_length_14573_cov_1.378236_31	31	12511	12960	-1	VOG00888	REFSEQ hypothetical protein; Xu	Xu
C40A_NODE_280_length_14573_cov_1.378236_32	32	12953	13405	-1
C40A_NODE_280_length_14573_cov_1.378236_33	33	13395	13820	-1
C40A_NODE_280_length_14573_cov_1.378236_34	34	13822	14442	-1
C40A_NODE_280_length_14573_cov_1.378236_35	35	14439	14573	-1
C40A_NODE_297_length_13929_cov_1.374801_1	1	1	456	1
C40A_NODE_297_length_13929_cov_1.374801_2	2	468	914	1	VOG01703	REFSEQ hypothetical protein; Xu	Xu
C40A_NODE_297_length_13929_cov_1.374801_3	3	923	1327	1	VOG02333	REFSEQ hypothetical protein; Xu	Xu
C40A_NODE_297_length_13929_cov_1.374801_4	4	1539	3314	1	VOG00185	REFSEQ lytic transglycosylase domain-containing protein; Xu	Xu
C40A_NODE_297_length_13929_cov_1.374801_5	5	3314	4117	1	VOG00373	REFSEQ hypothetical protein; Xu	Xu
C40A_NODE_297_length_13929_cov_1.374801_6	6	4117	4428	1	VOG00120	REFSEQ hypothetical protein; Xu	Xu
C40A_NODE_297_length_13929_cov_1.374801_7	7	4425	5282	1	VOG00860	REFSEQ hypothetical protein; Xu	Xu
C40A_NODE_297_length_13929_cov_1.374801_8	8	5284	5988	1	VOG00425	sp|P31340|SPIKE_BPP2 Spike protein; XhXpXs	Xs;Xp;Xh
C40A_NODE_297_length_13929_cov_1.374801_9	9	5978	6451	-1
C40A_NODE_297_length_13929_cov_1.374801_10	10	6532	6891	1
C40A_NODE_297_length_13929_cov_1.374801_11	11	6899	8137	1	VOG02429	sp|P51767|BPJ_BPP2 Baseplate protein J; XhXs	Xs;Xh
C40A_NODE_297_length_13929_cov_1.374801_12	12	8134	8820	1
C40A_NODE_297_length_13929_cov_1.374801_13	13	8798	10228	1	VOG00696	sp|P33227|STFE_ECOLI Putative uncharacterized protein StfE; Xu	Xu
C40A_NODE_297_length_13929_cov_1.374801_14	14	10225	10386	1
C40A_NODE_297_length_13929_cov_1.374801_15	15	10402	11397	-1
C40A_NODE_297_length_13929_cov_1.374801_16	16	11590	11868	1	VOG25481	REFSEQ hypothetical protein; Xu	Xu
C40A_NODE_297_length_13929_cov_1.374801_17	17	11870	12193	1	VOG03167	sp|P0AG11|UMUD_ECOLI Protein UmuD; Xh	Xh
C40A_NODE_297_length_13929_cov_1.374801_18	18	12387	13430	-1	VOG00012	sp|P22877|INTR_SACER Integrase; XhXr	Xr;Xh
C40A_NODE_297_length_13929_cov_1.374801_19	19	13749	13928	-1
C40A_NODE_298_length_13914_cov_1.305868_1	1	2	1381	1	VOG03158	sp|Q9USU3|FBH1_SCHPO F-box DNA helicase protein 1; Xh	Xh
C40A_NODE_298_length_13914_cov_1.305868_2	2	1382	1639	1
C40A_NODE_298_length_13914_cov_1.305868_3	3	1639	1800	1
C40A_NODE_298_length_13914_cov_1.305868_4	4	1855	2307	1	VOG00299	REFSEQ hypothetical protein; Xu	Xu
C40A_NODE_298_length_13914_cov_1.305868_5	5	2317	2856	1
C40A_NODE_298_length_13914_cov_1.305868_6	6	2893	3162	1
C40A_NODE_298_length_13914_cov_1.305868_7	7	3155	3718	1
C40A_NODE_298_length_13914_cov_1.305868_8	8	3718	4074	1
C40A_NODE_298_length_13914_cov_1.305868_9	9	4074	4265	1
C40A_NODE_298_length_13914_cov_1.305868_10	10	4267	4452	1
C40A_NODE_298_length_13914_cov_1.305868_11	11	4445	4981	1
C40A_NODE_298_length_13914_cov_1.305868_12	12	4978	5232	1
C40A_NODE_298_length_13914_cov_1.305868_13	13	5242	5448	1
C40A_NODE_298_length_13914_cov_1.305868_14	14	5506	5862	1
C40A_NODE_298_length_13914_cov_1.305868_15	15	5935	6168	1
C40A_NODE_298_length_13914_cov_1.305868_16	16	6267	7331	1	VOG01170	sp|P18780|TERC_ALCSP Tellurium resistance protein TerC; Xh	Xh
C40A_NODE_298_length_13914_cov_1.305868_17	17	7573	7770	1
C40A_NODE_298_length_13914_cov_1.305868_18	18	7770	8135	1
C40A_NODE_298_length_13914_cov_1.305868_19	19	8137	8307	1
C40A_NODE_298_length_13914_cov_1.305868_20	20	8327	8923	1	VOG02675	REFSEQ hypothetical protein; Xu	Xu
C40A_NODE_298_length_13914_cov_1.305868_21	21	8936	9148	1
C40A_NODE_298_length_13914_cov_1.305868_22	22	9203	9781	1	VOG00844	REFSEQ hypothetical protein; Xu	Xu
C40A_NODE_298_length_13914_cov_1.305868_23	23	9783	10331	1
C40A_NODE_298_length_13914_cov_1.305868_24	24	10347	11459	1	VOG24429	sp|P60108|TELL_STAAN TelA-like protein SA1238; Xu	Xu
C40A_NODE_298_length_13914_cov_1.305868_25	25	11461	11724	1
C40A_NODE_298_length_13914_cov_1.305868_26	26	11714	12400	1	VOG11965	REFSEQ hypothetical protein; Xu	Xu
C40A_NODE_298_length_13914_cov_1.305868_27	27	12459	13241	1
C40A_NODE_298_length_13914_cov_1.305868_28	28	13276	13875	1	VOG01174	sp|P18781|TERD_ALCSP Tellurium resistance protein TerD; Xh	Xh
C40A_NODE_304_length_13711_cov_1.332744_1	1	1	570	1
C40A_NODE_304_length_13711_cov_1.332744_2	2	959	1690	-1	VOG25223	REFSEQ N-acetylmuramoyl-L-alanine amidase; Xu	Xu
C40A_NODE_304_length_13711_cov_1.332744_3	3	1687	1896	-1	VOG02198	sp|O03978|HOLIN_BPDP1 Holin; XhXp	Xp;Xh
C40A_NODE_304_length_13711_cov_1.332744_4	4	1899	2399	-1
C40A_NODE_304_length_13711_cov_1.332744_5	5	2414	5050	-1	VOG22638	REFSEQ baseplate protein tal-like protein; Xu	Xu
C40A_NODE_304_length_13711_cov_1.332744_6	6	5051	6688	-1	VOG00635	REFSEQ tail family protein; Xu	Xu
C40A_NODE_304_length_13711_cov_1.332744_7	7	6685	10566	-1	VOG01168	REFSEQ hypothetical protein; Xu	Xu
C40A_NODE_304_length_13711_cov_1.332744_8	8	10836	11141	-1
C40A_NODE_304_length_13711_cov_1.332744_9	9	11152	11760	-1	VOG01659	REFSEQ tail protein; Xu	Xu
C40A_NODE_304_length_13711_cov_1.332744_10	10	11779	12168	-1
C40A_NODE_304_length_13711_cov_1.332744_11	11	12165	12557	-1	VOG17674	REFSEQ hypothetical protein; Xu	Xu
C40A_NODE_304_length_13711_cov_1.332744_12	12	12562	12948	-1
C40A_NODE_304_length_13711_cov_1.332744_13	13	12914	13246	-1	VOG03921	REFSEQ head-tail adapter protein; Xu	Xu
C40A_NODE_304_length_13711_cov_1.332744_14	14	13264	13710	-1
C40A_NODE_321_length_13433_cov_1.957613_1	1	3	218	-1
C40A_NODE_321_length_13433_cov_1.957613_2	2	261	479	-1
C40A_NODE_321_length_13433_cov_1.957613_3	3	482	742	-1
C40A_NODE_321_length_13433_cov_1.957613_4	4	752	1846	-1	VOG01413	sp|P69924|RIR2_ECOLI Ribonucleoside-diphosphate reductase 1 subunit beta; XhXr	Xr;Xh
C40A_NODE_321_length_13433_cov_1.957613_5	5	1846	2001	-1
C40A_NODE_321_length_13433_cov_1.957613_6	6	1985	2467	-1
C40A_NODE_321_length_13433_cov_1.957613_7	7	2504	4816	-1	VOG00109	sp|P00452|RIR1_ECOLI Ribonucleoside-diphosphate reductase 1 subunit alpha; XhXr	Xr;Xh
C40A_NODE_321_length_13433_cov_1.957613_8	8	4837	5082	-1	VOG18026	REFSEQ hypothetical protein; Xu	Xu
C40A_NODE_321_length_13433_cov_1.957613_9	9	5082	5498	-1	VOG21043	REFSEQ hypothetical protein; Xu	Xu
C40A_NODE_321_length_13433_cov_1.957613_10	10	5597	6577	-1	VOG01523	sp|A6LP90|THYX_THEM4 Flavin-dependent thymidylate synthase; XhXr	Xr;Xh
C40A_NODE_321_length_13433_cov_1.957613_11	11	6586	7173	-1	VOG00225	sp|P32275|Y12F_BPT4 Uncharacterized 32.4 kDa protein in Gp30-rIII intergenic region; Xu	Xu
C40A_NODE_321_length_13433_cov_1.957613_12	12	7175	7726	-1	VOG01427	sp|P13300|KITH_BPT4 Thymidine kinase; XhXr	Xr;Xh
C40A_NODE_321_length_13433_cov_1.957613_13	13	7803	8459	-1
C40A_NODE_321_length_13433_cov_1.957613_14	14	8636	9025	-1	VOG03793	REFSEQ hypothetical protein; Xu	Xu
C40A_NODE_321_length_13433_cov_1.957613_15	15	9068	10027	-1	VOG00541	sp|P00581|DPOL_BPT7 DNA-directed DNA polymerase; XhXr	Xr;Xh
C40A_NODE_321_length_13433_cov_1.957613_16	16	10024	11085	-1	VOG02518	sp|P13319|RNH_BPT4 Ribonuclease H; Xr	Xr
C40A_NODE_321_length_13433_cov_1.957613_17	17	11170	11367	-1
C40A_NODE_321_length_13433_cov_1.957613_18	18	11442	12320	-1	VOG00889	sp|A7MT92|RDGC_VIBCB Recombination-associated protein RdgC; Xr	Xr
C40A_NODE_321_length_13433_cov_1.957613_19	19	12364	12648	-1	VOG22154	REFSEQ hypothetical protein; Xu	Xu
C40A_NODE_321_length_13433_cov_1.957613_20	20	12648	13385	-1	VOG00065	sp|Q5UQE7|YL479_MIMIV Uncharacterized protein L479; Xu	Xu
C40A_NODE_324_length_13335_cov_1.236599_1	1	316	705	1	VOG00035	REFSEQ hypothetical protein; Xu	Xu
C40A_NODE_324_length_13335_cov_1.236599_2	2	702	1085	1	VOG01947	REFSEQ hypothetical protein; Xu	Xu
C40A_NODE_324_length_13335_cov_1.236599_3	3	1747	2229	1
C40A_NODE_324_length_13335_cov_1.236599_4	4	2229	2579	1	VOG13292	REFSEQ hypothetical protein; Xu	Xu
C40A_NODE_324_length_13335_cov_1.236599_5	5	2603	2872	-1	VOG14224	REFSEQ hypothetical protein; Xu	Xu
C40A_NODE_324_length_13335_cov_1.236599_6	6	2869	3000	-1
C40A_NODE_324_length_13335_cov_1.236599_7	7	3003	3197	-1	VOG02390	sp|P08986|BIMM_BPT4 Immunity protein; Xh	Xh
C40A_NODE_324_length_13335_cov_1.236599_8	8	3296	3997	1	VOG07054	REFSEQ hypothetical protein; Xu	Xu
C40A_NODE_324_length_13335_cov_1.236599_9	9	3990	6689	1	VOG01686	sp|Q6XQC4|TMP_BPT1 Tape measure protein; XpXrXs	Xr;Xp;Xs
C40A_NODE_324_length_13335_cov_1.236599_10	10	6689	7165	1	VOG00755	REFSEQ hypothetical protein; Xu	Xu
C40A_NODE_324_length_13335_cov_1.236599_11	11	7165	7635	1	VOG00846	REFSEQ DUF1833 family protein; Xu	Xu
C40A_NODE_324_length_13335_cov_1.236599_12	12	8007	10499	1	VOG00800	REFSEQ hypothetical protein; Xu	Xu
C40A_NODE_324_length_13335_cov_1.236599_13	13	10550	12565	1	VOG04365	REFSEQ putative capsular polysaccharide depolymerase; Xu	Xu
C40A_NODE_324_length_13335_cov_1.236599_14	14	12626	12865	1
C40A_NODE_324_length_13335_cov_1.236599_15	15	12934	13335	1	VOG01367	REFSEQ hypothetical protein; Xu	Xu
C40A_NODE_341_length_13029_cov_1.512324_1	1	261	1352	-1	VOG00012	sp|P22877|INTR_SACER Integrase; XhXr	Xr;Xh
C40A_NODE_341_length_13029_cov_1.512324_2	2	1501	2418	-1
C40A_NODE_341_length_13029_cov_1.512324_3	3	2474	4249	-1
C40A_NODE_341_length_13029_cov_1.512324_4	4	4269	5777	-1
C40A_NODE_341_length_13029_cov_1.512324_5	5	5804	5962	-1
C40A_NODE_341_length_13029_cov_1.512324_6	6	5952	6395	-1
C40A_NODE_341_length_13029_cov_1.512324_7	7	6399	6782	-1
C40A_NODE_341_length_13029_cov_1.512324_8	8	6948	7142	1
C40A_NODE_341_length_13029_cov_1.512324_9	9	7205	7945	1	VOG17574	sp|P03037|RANT_BPP22 Antirepressor protein ant; Xu	Xu
C40A_NODE_341_length_13029_cov_1.512324_10	10	7949	8290	1
C40A_NODE_341_length_13029_cov_1.512324_11	11	8293	8526	1
C40A_NODE_341_length_13029_cov_1.512324_12	12	8632	9168	1
C40A_NODE_341_length_13029_cov_1.512324_13	13	9155	9370	1
C40A_NODE_341_length_13029_cov_1.512324_14	14	9455	9604	1
C40A_NODE_341_length_13029_cov_1.512324_15	15	9608	10504	1	VOG02848	REFSEQ DUF1351 domain-containing protein; Xu	Xu
C40A_NODE_341_length_13029_cov_1.512324_16	16	10516	11484	1
C40A_NODE_341_length_13029_cov_1.512324_17	17	11498	12181	1	VOG02554	REFSEQ hypothetical protein; Xu	Xu
C40A_NODE_341_length_13029_cov_1.512324_18	18	12184	12504	1	VOG03071	REFSEQ hypothetical protein; Xu	Xu
C40A_NODE_341_length_13029_cov_1.512324_19	19	12679	13029	1
C40A_NODE_370_length_12488_cov_3.290349_1	1	2	721	-1	VOG10100	REFSEQ hypothetical protein; Xu	Xu
C40A_NODE_370_length_12488_cov_3.290349_2	2	714	2165	-1	VOG00031	sp|Q05220|PORTL_BPML5 Portal protein; XpXrXs	Xr;Xp;Xs
C40A_NODE_370_length_12488_cov_3.290349_3	3	2165	3508	-1	VOG00943	sp|P39786|XTMB_BACSU PBSX phage terminase large subunit; Xr	Xr
C40A_NODE_370_length_12488_cov_3.290349_4	4	3508	4242	-1	VOG00517	sp|P45915|YQAS_BACSU Uncharacterized protein YqaS; Xu	Xu
C40A_NODE_370_length_12488_cov_3.290349_5	5	4322	4486	-1
C40A_NODE_370_length_12488_cov_3.290349_6	6	4588	5181	-1
C40A_NODE_370_length_12488_cov_3.290349_7	7	5297	6049	1
C40A_NODE_370_length_12488_cov_3.290349_8	8	6020	6211	-1
C40A_NODE_370_length_12488_cov_3.290349_9	9	6218	6394	-1
C40A_NODE_370_length_12488_cov_3.290349_10	10	7113	7400	-1
C40A_NODE_370_length_12488_cov_3.290349_11	11	7504	7851	-1
C40A_NODE_370_length_12488_cov_3.290349_12	12	8061	8516	-1
C40A_NODE_370_length_12488_cov_3.290349_13	13	8549	8722	-1
C40A_NODE_370_length_12488_cov_3.290349_14	14	9103	9276	-1
C40A_NODE_370_length_12488_cov_3.290349_15	15	9354	9506	-1
C40A_NODE_370_length_12488_cov_3.290349_16	16	9521	10147	-1	VOG15455	REFSEQ hypothetical protein; Xu	Xu
C40A_NODE_370_length_12488_cov_3.290349_17	17	10125	10556	-1	VOG00400	sp|P00641|ENDO_BPT7 Endonuclease I; Xp	Xp
C40A_NODE_370_length_12488_cov_3.290349_18	18	10553	11266	-1
C40A_NODE_370_length_12488_cov_3.290349_19	19	11390	11653	-1	VOG02529	REFSEQ hypothetical protein; Xu	Xu
C40A_NODE_370_length_12488_cov_3.290349_20	20	11663	12313	-1	VOG02491	sp|P15026|ISTB_PSEAI Insertion sequence IS21 putative ATP-binding protein; Xh	Xh
C40A_NODE_370_length_12488_cov_3.290349_21	21	12267	12428	-1
C40A_NODE_418_length_11774_cov_1.767837_1	1	166	522	-1	VOG00133	sp|P34081|HMUI_BPSP1 DNA endonuclease I-HmuI; Xh	Xh
C40A_NODE_418_length_11774_cov_1.767837_2	2	826	1482	-1
C40A_NODE_418_length_11774_cov_1.767837_3	3	1744	2139	-1
C40A_NODE_418_length_11774_cov_1.767837_4	4	2132	3508	-1	VOG00140	sp|P04308|ETF1_VACCW Early transcription factor 70 kDa subunit; XhXs	Xs;Xh
C40A_NODE_418_length_11774_cov_1.767837_5	5	3483	3824	-1	VOG00135	sp|Q9T1Q4|VP44_BPAPS Putative nuclease p44; Xu	Xu
C40A_NODE_418_length_11774_cov_1.767837_6	6	4062	6425	-1	VOG00260	REFSEQ virulence-associated E family protein; Xu	Xu
C40A_NODE_418_length_11774_cov_1.767837_7	7	6435	9293	-1	VOG01296	sp|Q9T1Q3|DPOL_BPAPS Probable DNA polymerase; XhXr	Xr;Xh
C40A_NODE_418_length_11774_cov_1.767837_8	8	9346	9879	-1	VOG02472	sp|Q9T1P8|VP50_BPAPS Putative protein p50; Xu	Xu
C40A_NODE_418_length_11774_cov_1.767837_9	9	9927	11063	-1	VOG02318	sp|O64262|VG69_BPMD2 Gene 69 protein; Xu	Xu
C40A_NODE_418_length_11774_cov_1.767837_10	10	11060	11362	-1
C40A_NODE_418_length_11774_cov_1.767837_11	11	11349	11492	-1
C40A_NODE_418_length_11774_cov_1.767837_12	12	11570	11773	-1
C40A_NODE_437_length_11382_cov_1.282097_1	1	1698	2069	1
C40A_NODE_437_length_11382_cov_1.282097_2	2	2393	3277	-1	VOG20381	REFSEQ hypothetical protein; Xu	Xu
C40A_NODE_437_length_11382_cov_1.282097_3	3	3403	3807	-1
C40A_NODE_437_length_11382_cov_1.282097_4	4	3907	4260	-1
C40A_NODE_437_length_11382_cov_1.282097_5	5	4456	4686	-1
C40A_NODE_437_length_11382_cov_1.282097_6	6	4963	5133	-1
C40A_NODE_437_length_11382_cov_1.282097_7	7	5428	5676	-1
C40A_NODE_437_length_11382_cov_1.282097_8	8	5673	6029	-1
C40A_NODE_437_length_11382_cov_1.282097_9	9	6185	6877	-1	VOG02089	REFSEQ Rha family transcriptional regulator; Xu	Xu
C40A_NODE_437_length_11382_cov_1.282097_10	10	6976	7167	-1
C40A_NODE_437_length_11382_cov_1.282097_11	11	7308	7805	1
C40A_NODE_437_length_11382_cov_1.282097_12	12	7859	9076	1	VOG00012	sp|P22877|INTR_SACER Integrase; XhXr	Xr;Xh
C40A_NODE_437_length_11382_cov_1.282097_13	13	9309	10523	-1	VOG00012	sp|P22877|INTR_SACER Integrase; XhXr	Xr;Xh
C40A_NODE_437_length_11382_cov_1.282097_14	14	10594	11097	-1
C40A_NODE_446_length_11339_cov_1.609882_1	1	3	104	-1
C40A_NODE_446_length_11339_cov_1.609882_2	2	637	786	1
C40A_NODE_446_length_11339_cov_1.609882_3	3	764	1138	-1
C40A_NODE_446_length_11339_cov_1.609882_4	4	1177	1443	-1
C40A_NODE_446_length_11339_cov_1.609882_5	5	1806	2183	-1	VOG05747	REFSEQ holin; Xu	Xu
C40A_NODE_446_length_11339_cov_1.609882_6	6	2170	3630	-1	VOG00531	REFSEQ hypothetical protein; Xu	Xu
C40A_NODE_446_length_11339_cov_1.609882_7	7	3646	4404	-1	VOG00317	REFSEQ hypothetical protein; Xu	Xu
C40A_NODE_446_length_11339_cov_1.609882_8	8	4388	4549	-1
C40A_NODE_446_length_11339_cov_1.609882_9	9	4553	4783	-1	VOG23877	REFSEQ hypothetical protein; Xu	Xu
[truncated: 4,157 more rows]

## Sheet: Table S10
id	alias	firstCreated	firstPublic	releaseStatus	secondaryId	title	taxId	scientificName
[truncated: 18 more rows]
